# Supplementary material for: A practical approach for oligopeptide synthesis via synergistic photoredox, cobaloxime and organophosphorus triple catalysis
Source: Royal Society of Chemistry journal article supplement (doi:10.1039/d3qo00994g), 2023-01-01

## Supplementary Information

### **A Practical Approach for Oligopeptide Synthesis via Synergistic Photoredox, Cobaloxime, and Organophosphorus Triple Catalysis**

*Junqi Su,<sup>a</sup> Jia-Nan Mo,<sup>a</sup> Guofeng Zhang,<sup>a</sup> Ziyu Jiang,<sup>a</sup> and Jiannan Zhao<sup>a,\*</sup>*

<sup>a</sup>School of Chemistry, Dalian University of Technology, Dalian 116024, People's  
Republic of China.

\* To whom correspondence should be addressed:  
Email: jnzhao@dlut.edu.cn

## Table of Contents

|                                                                     |     |
|---------------------------------------------------------------------|-----|
| 1. General Information.....                                         | S2  |
| 2. Reaction Optimization .....                                      | S5  |
| 2.1 Reaction setup.....                                             | S5  |
| 2.2 General procedure.....                                          | S7  |
| 2.3 Optimization details .....                                      | S8  |
| 2.4 Comparative experiments .....                                   | S13 |
| 2.5 Characterization data.....                                      | S14 |
| 3. Dipeptide Synthesis.....                                         | S16 |
| 3.1 General procedure.....                                          | S16 |
| 3.2 Characterization data.....                                      | S16 |
| 4. Gram-scale Synthesis in Continuous-flow .....                    | S27 |
| 4.1 Flow reactor setup. ....                                        | S27 |
| 4.2 General procedure.....                                          | S28 |
| 4.3 General procedure for the deprotection of the Cbz-group .....   | S28 |
| 4.4 General procedure for the deprotection of the Boc-group .....   | S29 |
| 4.5 General procedure for hydrolysis of methyl esters .....         | S29 |
| 4.6 General procedure for multigram synthesis.....                  | S29 |
| 4.7 Characterization data.....                                      | S30 |
| 5. Peptide fragment condensation .....                              | S34 |
| 5.1 Synthesis of proglyuprol.....                                   | S34 |
| 5.2 Synthesis of LAGV in batch .....                                | S35 |
| 5.3 Synthesis of LAGV in continuous-flow .....                      | S36 |
| 5.4 Synthesis of leu-enkephalin .....                               | S37 |
| 5.5 Synthesis of ( <sup>t</sup> Bu)-fanlizhicyclopeptide B.....     | S38 |
| 5.6 Characterization data.....                                      | S41 |
| 6. Solid phase peptide synthesis (SPPS) of PAR2 .....               | S45 |
| 7. Control experiments .....                                        | S48 |
| 7.1 Radical quenching experiment.....                               | S48 |
| 7.2 Light ON/OFF experiments .....                                  | S48 |
| 7.3 Detection of hydrogen.....                                      | S49 |
| 7.4 Amidation promoted by hydrosilanes .....                        | S51 |
| 7.5 Reduction of Ph <sub>3</sub> P=O to PPh <sub>3</sub> .....      | S55 |
| 8. References.....                                                  | S57 |
| 9. Copy of <sup>1</sup> H NMR and <sup>13</sup> C NMR spectra ..... | S58 |

## 1. General Information

All reactions were performed in dry solvents under a N<sub>2</sub> atmosphere and anhydrous conditions. Acetonitrile (MeCN) was freshly distilled over CaH<sub>2</sub> prior to use. All other reagents were used as received from commercial sources. Pd/C was 10% palladium on carbon (wetted with ca. 55% water). Reactions were monitored through thin layer chromatography (TLC) on 0.25-mm silica gel plates and visualized with UV light (254 nm) and w.t.10% phosphomolybdic acid in ethanol solution. Flash column chromatography (FCC) was performed using silica gel. NMR spectra were recorded using Bruker Magnet System 400 Ascend instruments, calibrated to CD(H)Cl<sub>3</sub>, DMSO-*d*<sub>6</sub>, CD<sub>3</sub>OD as the internal reference (7.26, 2.50, 3.31 and 77.0, 39.5, 49.0 ppm for <sup>1</sup>H and <sup>13</sup>C NMR spectra, respectively). <sup>1</sup>H NMR spectral data are reported in terms of chemical shift (δ, ppm), multiplicity, coupling constant (Hz), and integration. <sup>13</sup>C NMR spectral data are reported in terms of chemical shift (δ, ppm). The following abbreviations indicate the multiplicities: s, singlet. d, doublet. t, triplet. q, quartet. m, multiplet. High-resolution mass spectra were obtained using Thermo Fisher Scientific Q Exactive Plus mass spectrometer with electrospray ionization (ESI) probe operating in positive ion mode or Thermo Fisher Scientific Exactive GC high-resolution orbitrap GC mass using electron impact. Gas chromatography (GC) was performed on a Techcomp GC 7900 instrument. High Performance Liquid Chromatography were obtained from SHIMADZU LC-2030 Plus. The photocatalysts [Ir(dF(CF<sub>3</sub>)ppy)<sub>2</sub>(dtbbpy)]PF<sub>6</sub><sup>1</sup> and the cobaloximes Co(dmgh)(dmgh<sub>2</sub>)Cl<sup>2</sup> were prepared according to previous reports.

The abbreviations and structures for all amino acids in the manuscript were shown below:

| entry | abbreviation | amino acid              | structure                                                                             |
|-------|--------------|-------------------------|---------------------------------------------------------------------------------------|
| 1     | Gly          | glycine                 | 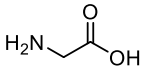   |
| 2     | Ala          | <i>L</i> -alanine       | 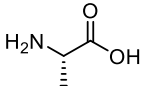   |
| 3     | Val          | <i>L</i> -valine        | 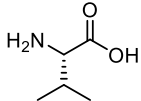   |
| 4     | Leu          | <i>L</i> -leucine       | 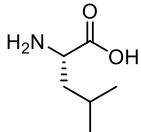   |
| 5     | Ile          | <i>L</i> -isoleucine    | 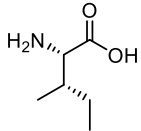   |
| 6     | Phe          | <i>L</i> -phenylalanine | 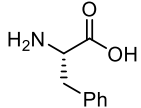  |
| 7     | Pro          | <i>L</i> -proline       | 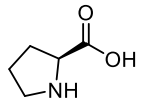 |
| 8     | Cys          | <i>L</i> -cysteine      | 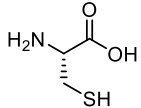 |
| 9     | Met          | <i>L</i> -methionine    | 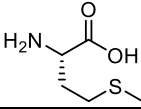 |
| 10    | Ser          | <i>L</i> -serine        | 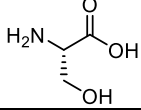 |
| 11    | Thr          | <i>L</i> -threonine     | 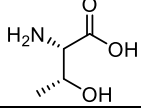 |
| 12    | Tyr          | <i>L</i> -tyrosine      | 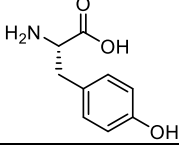 |
| 13    | Lys          | <i>L</i> -lysine        | 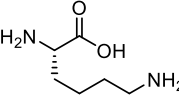 |

|    |                  |                                       |                                                                                       |
|----|------------------|---------------------------------------|---------------------------------------------------------------------------------------|
| 14 | Arg              | <i>L</i> -arginine                    | 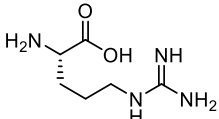   |
| 15 | His              | <i>L</i> -histidine                   | 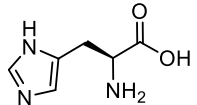   |
| 16 | Trp              | <i>L</i> -tryptophan                  | 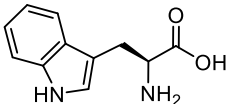   |
| 17 | Asp              | <i>L</i> -aspartic acid               | 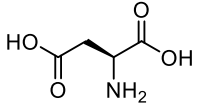   |
| 18 | Glu              | <i>L</i> -glutamic acid               | 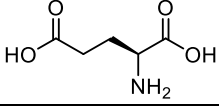   |
| 19 | Asn              | <i>L</i> -asparagine                  | 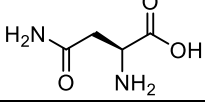   |
| 20 | Gln              | <i>L</i> -glutamine                   | 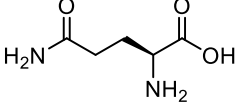  |
| 21 | Phg              | <i>L</i> -phenylglycine               | 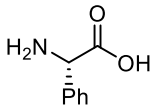 |
| 22 | Orn              | <i>L</i> -ornithine                   | 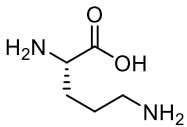 |
| 23 | $\beta$ -Ala     | $\beta$ -alanine                      | 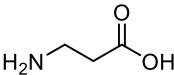 |
| 24 | Aib              | 2-aminoisobutyric acid                | 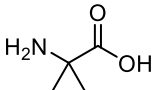 |
| 25 | A <sub>c5c</sub> | 1-aminocyclopentane-1-carboxylic acid | 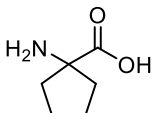 |

## 2. Reaction Optimization

### 2.1 Reaction setup

All the reactions were performed with an RLH-18 octet photocatalytic parallel reaction system (Figure S1), which was purchased from Beijing Roger tech Ltd. The reaction system was equipped with eight 456 nm 10 W blue light LEDs (Figure S2) and placed on a magnetic hotplate stirrer (DLAB MS-H-Pro<sup>A</sup>) to keep the reaction temperature at 65 °C.

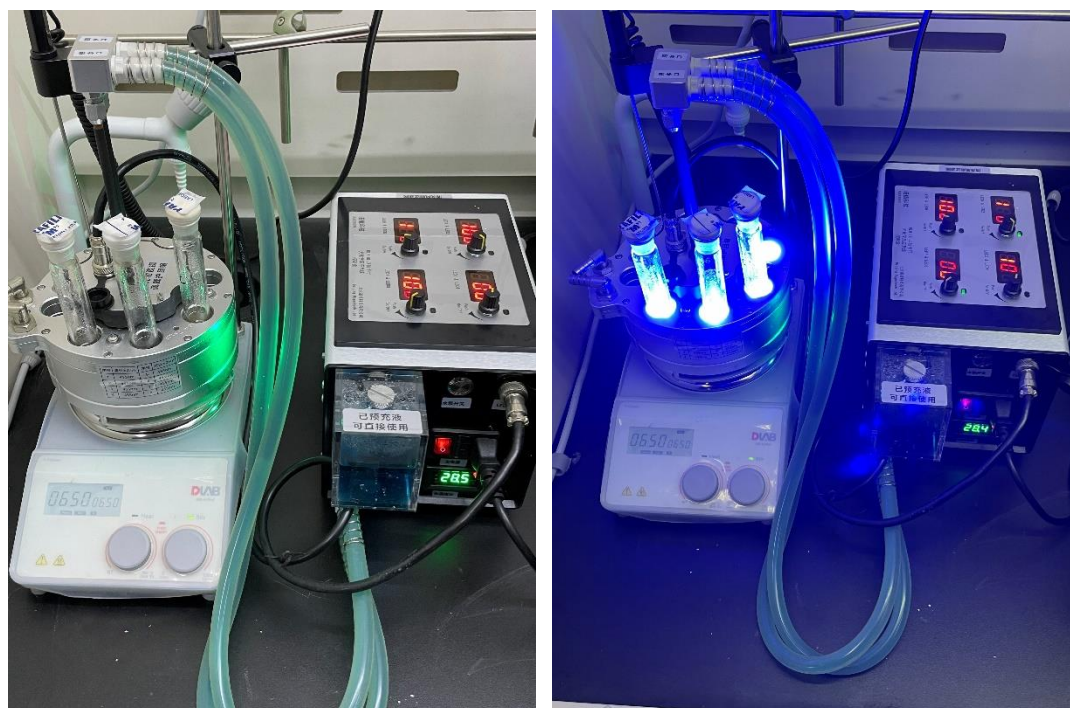

**Figure S1.** Integrated photoreactor and associated equipment

## RLH-18 10WLED Test report

### Product Mark

Model: 1-455nm(456.7)@10W  
Temperature: 20°C  
Tester: Wu

Manufacture: Beijing Rogertech Ltd  
Humidity: 65%  
Test Date: 2022-06-21,15:34:31

### Parameter

| Name                      | Value         | Name                    | Value         | Name              | Value       | Name | Value |
|---------------------------|---------------|-------------------------|---------------|-------------------|-------------|------|-------|
| ESuv(mW/cm <sup>2</sup> ) | 0.0000        | CIE u,v                 | 0.1839,0.0693 | CIE1931 Y         | 130873.648  |      |       |
| Euvc(mW/cm <sup>2</sup> ) | 0.0000        | CIE u',v'               | 0.1839,0.1039 | CIE1931 Z         | 2949318.500 |      |       |
| Euvb(mW/cm <sup>2</sup> ) | 0.0000        | SDCM                    | 100.00        | TLCI-2012         | 1           |      |       |
| Euva(mW/cm <sup>2</sup> ) | 0.0000        | Ra                      | -63.7         | Integral Time(ms) | 0.1         |      |       |
| Euv(mW/cm <sup>2</sup> )  | 0.00          | Ee(mW/cm <sup>2</sup> ) | 194.23262     | Peak Signal       | 53258       |      |       |
| Eb(mW/cm <sup>2</sup> )   | 190.91        | S/P                     | 20.108        | Dark Signal       | 2045        |      |       |
| Eg(mW/cm <sup>2</sup> )   | 1.67          | Dominant(nm)            | 461.30        | Compensate level  | 2878        |      |       |
| Er(mW/cm <sup>2</sup> )   | 0.00          | Purity(%)               | 98.5          |                   |             |      |       |
| Eir(mW/cm <sup>2</sup> )  | 0.00          | HalfWidth(nm)           | 25.2          |                   |             |      |       |
| E(lx)                     | 89386.70      | Peak(nm)                | 456.7         |                   |             |      |       |
| Candle E(fc)              | 8304.23       | Center(nm)              | 457.4         |                   |             |      |       |
| CCT(K)                    | 100000        | Centroid(nm)            | 458.5         |                   |             |      |       |
| Duv                       | -0.05186      | Color Ratio(RGB)        | 0.0,12.1,87.9 |                   |             |      |       |
| CIE x,y                   | 0.1446,0.0363 | CIE1931 X               | 520893.188    |                   |             |      |       |

### Spectrogram

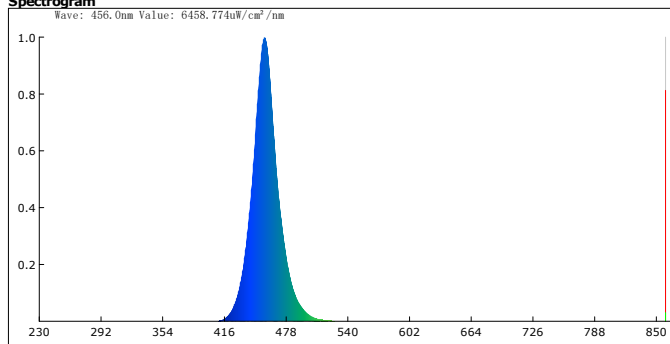

### CIE1931

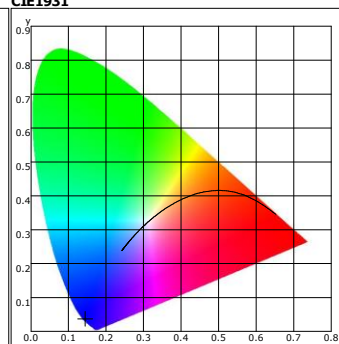

### CRI

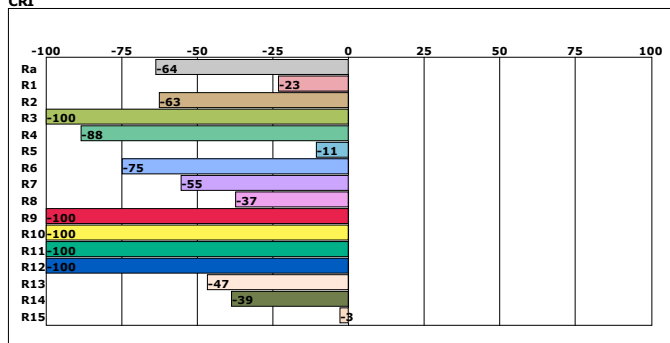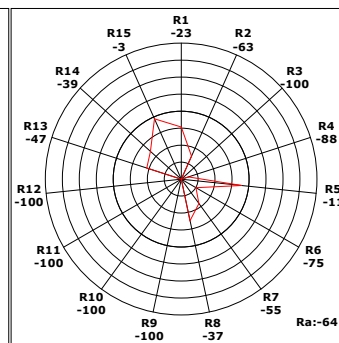

### Instrument Status

Type: OHSP-350UV  
Integral Time: 0.077ms

SN: 0  
VPeak: 53258

Scan Range: 230-850nm  
VDark: 2045

Remark:

- 1 -

Figure S2. RLH-18 10W LED Test Report

## 2.2 General procedure

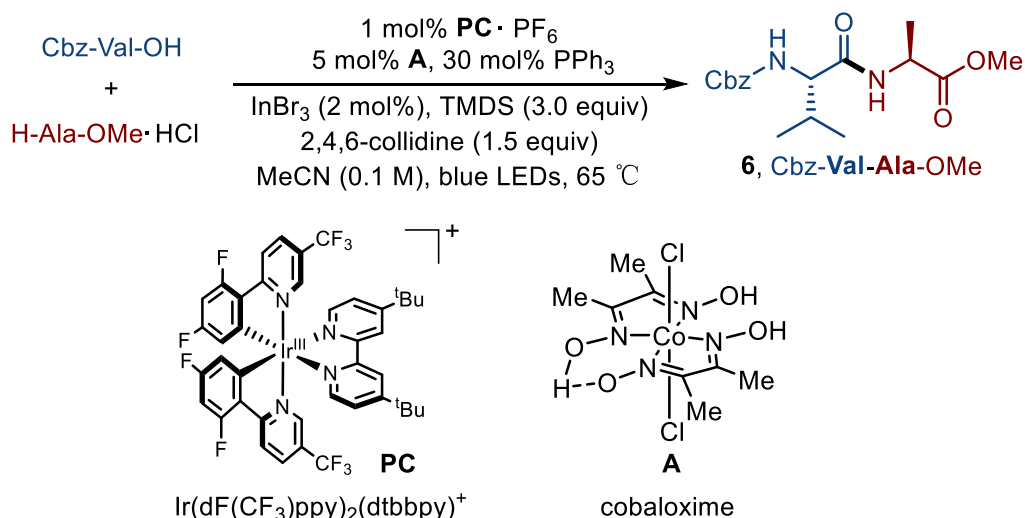

To an oven-dried reaction tube equipped with a stir bar was added Cbz-*L*-Val-OH (0.2 mmol, 1.0 equiv.), *L*-Ala-OMe-HCl (0.3 mmol, 1.5 equiv.), PPh<sub>3</sub> (0.06 mmol, 30 mol%), InBr<sub>3</sub> (2 mol%), [Ir(dF(CF<sub>3</sub>)ppy)<sub>2</sub>(dtbbpy)]PF<sub>6</sub> (1 mol%) and Co(dmgh)(dmgh<sub>2</sub>)Cl<sub>2</sub> (5 mol%). The tube was sealed and placed under nitrogen before MeCN (2 mL), TMDS (0.6 mmol, 3.0 equiv.) and 2,4,6-collidine (0.3 mmol, 1.5 equiv.) were added. Then the system was stirred under the irradiation of blue LED lamps at 65 °C for 12 h. Upon complete consumption of the starting material, the reaction mixture was concentrated and purified through column chromatography to afford the desired peptide product.

## 2.3 Optimization details

**Table S1.** Screening of cobaloxime catalysts

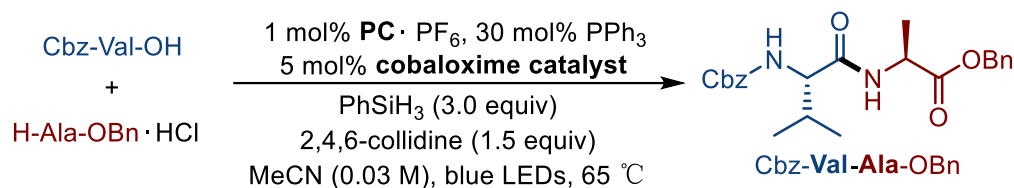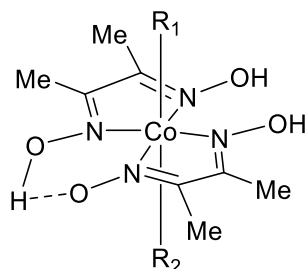

**Co<sup>III</sup>-A**; R<sub>1</sub> = R<sub>2</sub> = Cl; Co(dmgh)(dmgh<sub>2</sub>)Cl<sub>2</sub>

**Co<sup>III</sup>-B**; R<sub>1</sub> = Cl; R<sub>2</sub> = Py; Co(dmgh)<sub>2</sub>PyCl

**Co<sup>III</sup>-C**; R<sub>1</sub> = Cl; R<sub>2</sub> = 4-OMePy; Co(dmgh)<sub>2</sub>(4-OMePy)Cl

**Co<sup>III</sup>-D**; R<sub>1</sub> = Cl; R<sub>2</sub> = 4-NMe<sub>2</sub>Py; Co(dmgh)<sub>2</sub>(4-NMe<sub>2</sub>Py)Cl

**Co<sup>III</sup>-E**; R<sub>1</sub> = Cl; R<sub>2</sub> = 4-CNPy; Co(dmgh)<sub>2</sub>(4-CNPy)Cl

**Co<sup>III</sup>-F**; R<sub>1</sub> = Cl; R<sub>2</sub> = 4-COMePy; Co(dmgh)<sub>2</sub>(4-COMePy)Cl

**Co<sup>III</sup>-G**; R<sub>1</sub> = Cl; R<sub>2</sub> = 4-COOMePy; Co(dmgh)<sub>2</sub>(4-COOMePy)Cl

**Co<sup>III</sup>-H**; R<sub>1</sub> = R<sub>2</sub> = Py; Co(dmgh)(dmgh<sub>2</sub>)Py<sub>2</sub>

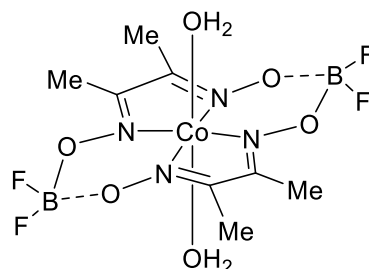

**Co<sup>II</sup>-I**; Co(dmghBF<sub>2</sub>)<sub>2</sub>(H<sub>2</sub>O)<sub>2</sub>

| entry | cobaloxime catalyst | yield(%) <sup>a</sup> |
|-------|---------------------|-----------------------|
| 1     | <b>A</b>            | 49                    |
| 2     | <b>B</b>            | 43                    |
| 3     | <b>C</b>            | 42                    |
| 4     | <b>D</b>            | 42                    |
| 5     | <b>E</b>            | 40                    |
| 6     | <b>F</b>            | 45                    |
| 7     | <b>G</b>            | 38                    |
| 8     | <b>H</b>            | 46                    |
| 9     | <b>I</b>            | trace                 |

<sup>a</sup>Yields of isolated products.

**Table S2.** Screening of hydrosilanes

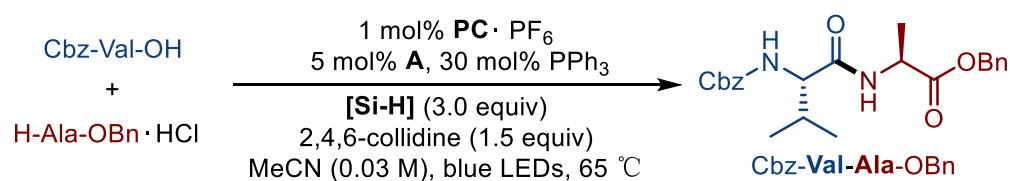

| entry           | [Si-H]                           | yield(%) <sup>a</sup> |
|-----------------|----------------------------------|-----------------------|
| 1               | PhSiH <sub>3</sub>               | 49                    |
| 2 <sup>b</sup>  | PhSiH <sub>3</sub>               | 55                    |
| 3 <sup>c</sup>  | PhSiH <sub>3</sub>               | 39                    |
| 4               | Ph <sub>2</sub> SiH <sub>2</sub> | 35                    |
| 5               | Ph <sub>3</sub> SiH              | 30                    |
| 6 <sup>d</sup>  | (EtO) <sub>2</sub> MeSiH         | 22                    |
| 7 <sup>b</sup>  | (EtO) <sub>3</sub> SiH           | 44                    |
| 8 <sup>b</sup>  | Et <sub>3</sub> SiH              | 60                    |
| 9 <sup>d</sup>  | PMHS                             | 25                    |
| 10              | TMDS                             | 46                    |
| 11 <sup>b</sup> | TMDS                             | 77                    |
| 12 <sup>c</sup> | TMDS                             | 37                    |

<sup>a</sup>Yields of isolated products. <sup>b</sup>InBr<sub>3</sub> (2 mol%) was added. <sup>c</sup>Ti(O<sup>i</sup>Pr)<sub>4</sub> (10 mol%) was added. <sup>d</sup>bis-(4-nitrophenyl)phosphate (15 mol%) was added.

**Table S3.** Screening of additives

| <div style="display: flex; align-items: center; justify-content: center;"> <div style="text-align: center; margin-right: 20px;"> <p>Cbz-Val-OH</p> <p>+</p> <p>H-Ala-OBn · HCl</p> </div> <div style="text-align: center; margin-right: 20px;"> <p>1 mol% PC · PF<sub>6</sub></p> <p>5 mol% <b>A</b>, 30 mol% PPh<sub>3</sub></p> <hr style="width: 100%;"/> <p>TMDS (3.0 equiv), [In.] (2 mol%)</p> <p>2,4,6-collidine (1.5 equiv)</p> <p>MeCN (0.03 M), blue LEDs, 65 °C</p> </div> <div style="text-align: center;"> 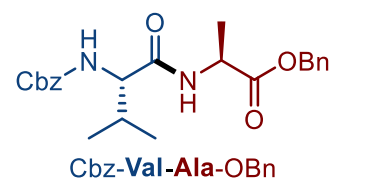 <p>Cbz-Val-Ala-OBn</p> </div> </div> |                                                      |                       |
|---------------------------------------------------------------------------------------------------------------------------------------------------------------------------------------------------------------------------------------------------------------------------------------------------------------------------------------------------------------------------------------------------------------------------------------------------------------------------------------------------------------------------------------------------------------------------------------------------------------------------------------------------|------------------------------------------------------|-----------------------|
| entry                                                                                                                                                                                                                                                                                                                                                                                                                                                                                                                                                                                                                                             | [In.]                                                | yield(%) <sup>a</sup> |
| 1                                                                                                                                                                                                                                                                                                                                                                                                                                                                                                                                                                                                                                                 | InCl <sub>3</sub>                                    | 38                    |
| 2                                                                                                                                                                                                                                                                                                                                                                                                                                                                                                                                                                                                                                                 | InI <sub>3</sub>                                     | 63                    |
| 3                                                                                                                                                                                                                                                                                                                                                                                                                                                                                                                                                                                                                                                 | In <sub>2</sub> (SO <sub>4</sub> ) <sub>3</sub>      | 37                    |
| 4                                                                                                                                                                                                                                                                                                                                                                                                                                                                                                                                                                                                                                                 | In(OTf) <sub>3</sub>                                 | 36                    |
| 5                                                                                                                                                                                                                                                                                                                                                                                                                                                                                                                                                                                                                                                 | In(acac) <sub>3</sub>                                | 35                    |
| 6                                                                                                                                                                                                                                                                                                                                                                                                                                                                                                                                                                                                                                                 | InAc <sub>3</sub> ·6H <sub>2</sub> O                 | 37                    |
| 7                                                                                                                                                                                                                                                                                                                                                                                                                                                                                                                                                                                                                                                 | In(NO <sub>3</sub> ) <sub>3</sub> ·xH <sub>2</sub> O | 32                    |
| 8                                                                                                                                                                                                                                                                                                                                                                                                                                                                                                                                                                                                                                                 | InBr <sub>3</sub>                                    | 77                    |
| 9                                                                                                                                                                                                                                                                                                                                                                                                                                                                                                                                                                                                                                                 | InBr <sub>3</sub>                                    | 66                    |
| 10                                                                                                                                                                                                                                                                                                                                                                                                                                                                                                                                                                                                                                                | InBr <sub>3</sub>                                    | 71                    |
| 11                                                                                                                                                                                                                                                                                                                                                                                                                                                                                                                                                                                                                                                | InBr <sub>3</sub>                                    | 65                    |

<sup>a</sup>Yields of isolated products. <sup>b</sup>InBr<sub>3</sub> (1 mol%) was added. <sup>c</sup>InBr<sub>3</sub> (5 mol%) was added. <sup>d</sup>InBr<sub>3</sub> (10 mol%) was added.

**Table S4.** Screening of bases

| <div style="display: flex; align-items: center; justify-content: space-between;"> <div style="text-align: center;"> <p>Cbz-Val-OH</p> <p>+</p> <p>H-Ala-OBn · HCl</p> </div> <div style="text-align: center; flex-grow: 1;"> <p>1 mol% <b>PC</b> · PF<sub>6</sub><br/>5 mol% <b>A</b>, 30 mol% PPh<sub>3</sub></p> <p>TMDS (3.0 equiv), InBr<sub>3</sub> (2 mol%)<br/><b>base</b> (1.5 equiv)<br/>MeCN (0.03 M), blue LEDs, 65 °C</p> </div> <div style="text-align: center;"> 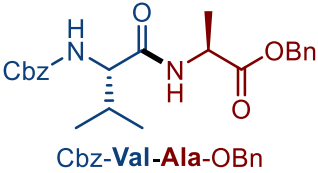 <p>Cbz-Val-Ala-OBn</p> </div> </div> |                                  |                       |
|--------------------------------------------------------------------------------------------------------------------------------------------------------------------------------------------------------------------------------------------------------------------------------------------------------------------------------------------------------------------------------------------------------------------------------------------------------------------------------------------------------------------------------------------------------------------------------------------------------|----------------------------------|-----------------------|
| entry                                                                                                                                                                                                                                                                                                                                                                                                                                                                                                                                                                                                  | base                             | yield(%) <sup>a</sup> |
| 1                                                                                                                                                                                                                                                                                                                                                                                                                                                                                                                                                                                                      | 2,4,6-collidine                  | 77                    |
| 2                                                                                                                                                                                                                                                                                                                                                                                                                                                                                                                                                                                                      | 2,6-lutidine                     | 66                    |
| 3                                                                                                                                                                                                                                                                                                                                                                                                                                                                                                                                                                                                      | DBU                              | 67                    |
| 4                                                                                                                                                                                                                                                                                                                                                                                                                                                                                                                                                                                                      | K <sub>2</sub> HPO <sub>4</sub>  | 63                    |
| 5                                                                                                                                                                                                                                                                                                                                                                                                                                                                                                                                                                                                      | Na <sub>2</sub> HPO <sub>4</sub> | 60                    |
| 6                                                                                                                                                                                                                                                                                                                                                                                                                                                                                                                                                                                                      | NaHCO <sub>3</sub>               | 67                    |

<sup>a</sup>Yields of isolated products.**Table S5.** Screening of temperature

| <div style="display: flex; align-items: center; justify-content: space-between;"> <div style="text-align: center;"> <p>Cbz-Val-OH</p> <p>+</p> <p>H-Ala-OBn · HCl</p> </div> <div style="text-align: center; flex-grow: 1;"> <p>1 mol% <b>PC</b> · PF<sub>6</sub><br/>5 mol% <b>A</b>, 30 mol% PPh<sub>3</sub></p> <p>TMDS (3.0 equiv), InBr<sub>3</sub> (2 mol%)<br/>2,4,6-collidine (1.5 equiv)<br/>MeCN (0.03 M), blue LEDs, <b>x</b> °C</p> </div> <div style="text-align: center;"> 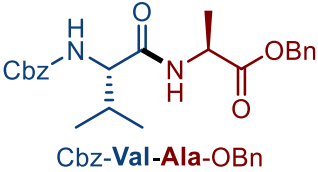 <p>Cbz-Val-Ala-OBn</p> </div> </div> |             |                       |
|-------------------------------------------------------------------------------------------------------------------------------------------------------------------------------------------------------------------------------------------------------------------------------------------------------------------------------------------------------------------------------------------------------------------------------------------------------------------------------------------------------------------------------------------------------------------------------------------------------------------|-------------|-----------------------|
| entry                                                                                                                                                                                                                                                                                                                                                                                                                                                                                                                                                                                                             | <b>x</b> °C | yield(%) <sup>a</sup> |
| 1                                                                                                                                                                                                                                                                                                                                                                                                                                                                                                                                                                                                                 | 25          | 41                    |
| 2                                                                                                                                                                                                                                                                                                                                                                                                                                                                                                                                                                                                                 | 50          | 40                    |
| 3                                                                                                                                                                                                                                                                                                                                                                                                                                                                                                                                                                                                                 | 65          | 77                    |
| 4                                                                                                                                                                                                                                                                                                                                                                                                                                                                                                                                                                                                                 | 80          | 68                    |

<sup>a</sup>Yields of isolated products.**Table S6.** Screening of solvent

| <div style="display: flex; align-items: center; justify-content: space-between;"> <div style="text-align: center;"> <p>Cbz-Val-OH</p> <p>+</p> <p>H-Ala-OBn · HCl</p> </div> <div style="text-align: center; flex-grow: 1;"> <p>1 mol% <b>PC</b> · PF<sub>6</sub><br/>5 mol% <b>A</b>, 30 mol% PPh<sub>3</sub></p> <p>TMDS (3.0 equiv), InBr<sub>3</sub> (2 mol%)<br/>2,4,6-collidine (1.5 equiv)<br/><b>solvent</b> (0.03M), blue LEDs, 65 °C</p> </div> <div style="text-align: center;"> 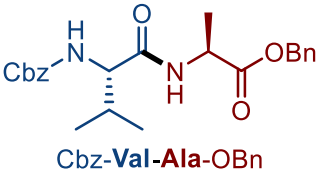 <p>Cbz-Val-Ala-OBn</p> </div> </div> |             |                       |
|-----------------------------------------------------------------------------------------------------------------------------------------------------------------------------------------------------------------------------------------------------------------------------------------------------------------------------------------------------------------------------------------------------------------------------------------------------------------------------------------------------------------------------------------------------------------------------------------------------------------------|-------------|-----------------------|
| entry                                                                                                                                                                                                                                                                                                                                                                                                                                                                                                                                                                                                                 | solvent     | yield(%) <sup>a</sup> |
| 1                                                                                                                                                                                                                                                                                                                                                                                                                                                                                                                                                                                                                     | DCE         | 62                    |
| 2                                                                                                                                                                                                                                                                                                                                                                                                                                                                                                                                                                                                                     | THF         | trace                 |
| 3                                                                                                                                                                                                                                                                                                                                                                                                                                                                                                                                                                                                                     | 1,4-dioxane | N.D.                  |
| 4                                                                                                                                                                                                                                                                                                                                                                                                                                                                                                                                                                                                                     | DMF         | N.D.                  |

|                |      |      |
|----------------|------|------|
| 5              | DMSO | N.P. |
| 6              | MeCN | 77   |
| 7 <sup>b</sup> | MeCN | 65   |
| 8 <sup>c</sup> | MeCN | 81   |
| 9 <sup>d</sup> | MeCN | 71   |

<sup>a</sup>Yields of isolated products. <sup>b</sup>MeCN (0.05M). <sup>c</sup>MeCN (0.1M). <sup>d</sup>MeCN (0.2M).

**Table S7.** Screening of protecting groups

| <div style="display: flex; align-items: center; justify-content: center;"> <div style="text-align: center;"> <p>Cbz-Val-OH</p> <p>+</p> <p>H-Ala-OR · HCl</p> </div> <div style="margin: 0 20px;"> <p>1 mol% PC · PF<sub>6</sub></p> <p>5 mol% <b>A</b>, 30 mol% PPh<sub>3</sub></p> <hr style="width: 100%;"/> <p>TMDS (3.0 equiv), InBr<sub>3</sub> (2 mol%)</p> <p>2,4,6-collidine (1.5 equiv)</p> <p>MeCN (0.1 M), blue LEDs, 65 °C</p> </div> <div style="text-align: center;"> <p>Cbz-Val-Ala-OR</p> </div> </div> |                 |                       |
|--------------------------------------------------------------------------------------------------------------------------------------------------------------------------------------------------------------------------------------------------------------------------------------------------------------------------------------------------------------------------------------------------------------------------------------------------------------------------------------------------------------------------|-----------------|-----------------------|
| entry                                                                                                                                                                                                                                                                                                                                                                                                                                                                                                                    | R               | yield(%) <sup>a</sup> |
| 1                                                                                                                                                                                                                                                                                                                                                                                                                                                                                                                        | Bzl             | 81                    |
| 2                                                                                                                                                                                                                                                                                                                                                                                                                                                                                                                        | <sup>t</sup> Bu | 83                    |
| 3                                                                                                                                                                                                                                                                                                                                                                                                                                                                                                                        | Et              | 77                    |
| 4                                                                                                                                                                                                                                                                                                                                                                                                                                                                                                                        | Me              | 86                    |

<sup>a</sup>Yields of isolated products.

Meanwhile, a series of unprotected amino acids were investigated. As shown in Figure S3, the reaction with unprotected tyrosine (Tyr) and arginine (Arg) led to a complicated mixture, and the yields of the target dipeptides were significantly reduced.

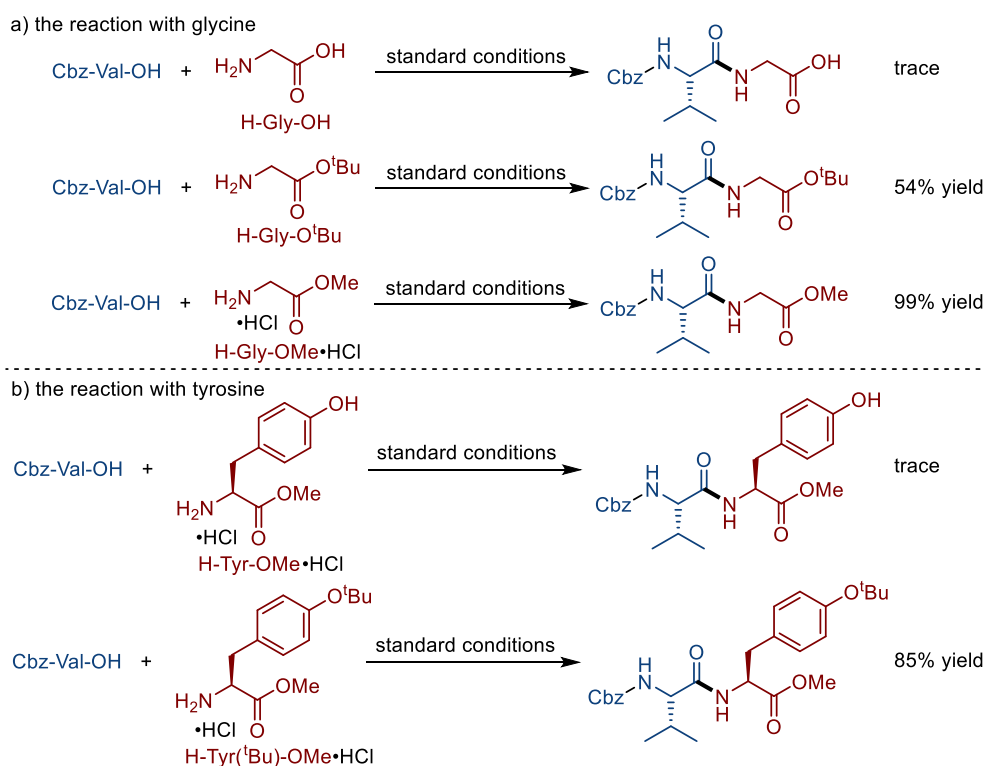

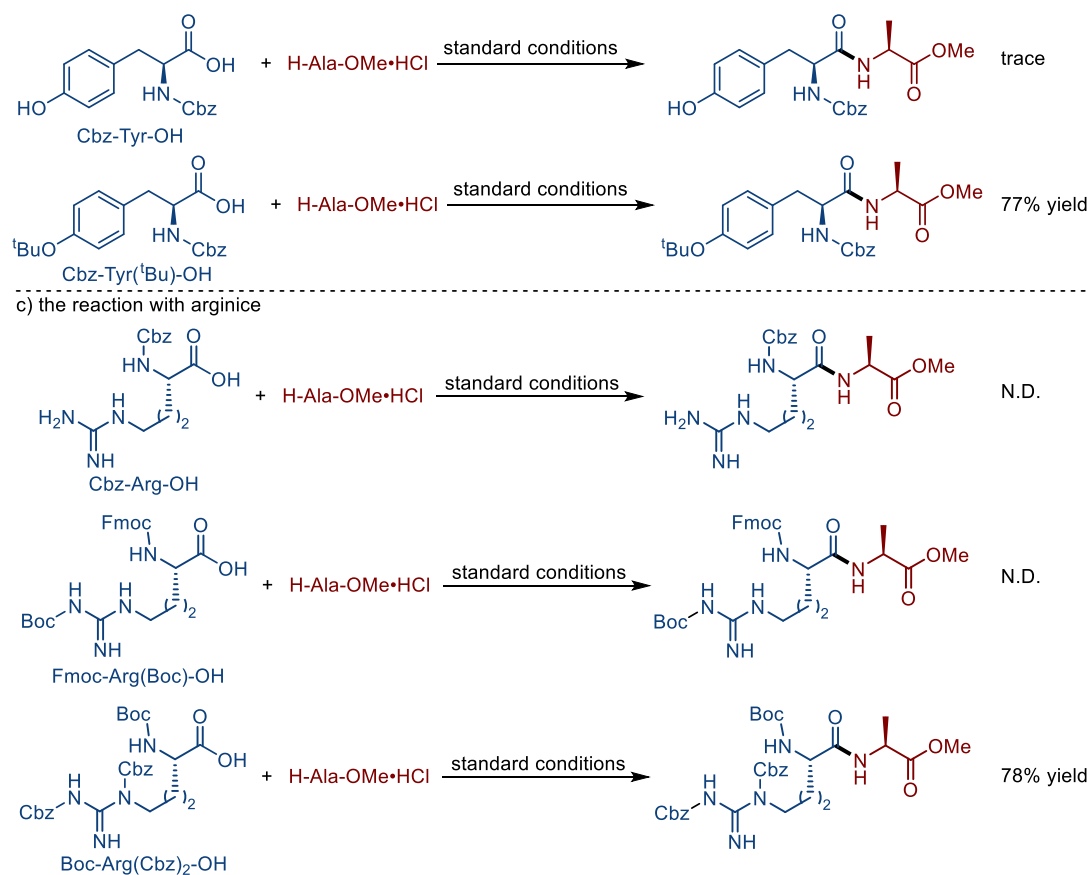

**Figure S3.** The reactions with unprotected amino acids

**Table S8.** Screening of phosphines

| <p> </p> |                     |                       |
|----------|---------------------|-----------------------|
| <p> </p> |                     |                       |
| entry    | P.                  | yield(%) <sup>a</sup> |
| 1        | PPh <sub>3</sub>    | 86                    |
| 2        | Ph <sub>3</sub> P=O | 53                    |
| 3        | <b>P-1</b>          | 57                    |
| 4        | <b>P-2</b>          | 45                    |
| 5        | <b>P-3</b>          | trace                 |

<sup>a</sup>Yields of isolated products.

**Table S9.** Screening of photocatalysts

| $  \begin{array}{c}  \text{Cbz-Val-OH} \\  + \\  \text{H-Ala-OMe} \cdot \text{HCl}  \end{array}  \xrightarrow[  \begin{array}{c}  \text{5 mol\% A, 30 mol\% PPh}_3 \\  \text{TMSD (3.0 equiv), InBr}_3 \text{ (2 mol\%)} \\  \text{2,4,6-collidine (1.5 equiv)} \\  \text{MeCN (0.1 M), blue LEDs, 65 }^\circ\text{C}  \end{array}  ]{  \begin{array}{c}  \text{x mol\% photocatalyst}  \end{array}  }  \begin{array}{c}  \text{Cbz-NH-CH(CH}_3\text{)-C(=O)-NH-CH(CH}_3\text{)-COOMe} \\  \text{Cbz-Val-Ala-OMe}  \end{array}  $ |                                                                    |   |                        |
|-----------------------------------------------------------------------------------------------------------------------------------------------------------------------------------------------------------------------------------------------------------------------------------------------------------------------------------------------------------------------------------------------------------------------------------------------------------------------------------------------------------------------------------|--------------------------------------------------------------------|---|------------------------|
| entry                                                                                                                                                                                                                                                                                                                                                                                                                                                                                                                             | photocatalyst                                                      | x | yield (%) <sup>a</sup> |
| 1                                                                                                                                                                                                                                                                                                                                                                                                                                                                                                                                 | [Ir(dF(CF <sub>3</sub> )ppy) <sub>2</sub> (dtbbpy)]PF <sub>6</sub> | 1 | 86                     |
| 2                                                                                                                                                                                                                                                                                                                                                                                                                                                                                                                                 | Ir(ppy) <sub>3</sub>                                               | 1 | trace                  |
| 3                                                                                                                                                                                                                                                                                                                                                                                                                                                                                                                                 | [Ir(dF(Me)ppy) <sub>2</sub> (dtbbpy)]PF <sub>6</sub>               | 1 | 55                     |
| 4                                                                                                                                                                                                                                                                                                                                                                                                                                                                                                                                 | Ru(bpy) <sub>3</sub> ·6H <sub>2</sub> O                            | 1 | trace                  |
| 5                                                                                                                                                                                                                                                                                                                                                                                                                                                                                                                                 | Ru(bpz) <sub>3</sub> (PF <sub>6</sub> ) <sub>2</sub>               | 1 | trace                  |
| 6                                                                                                                                                                                                                                                                                                                                                                                                                                                                                                                                 | 4-CzIPN                                                            | 5 | 23                     |
| 7                                                                                                                                                                                                                                                                                                                                                                                                                                                                                                                                 | Mes-Acr <sup>+</sup> BF <sub>4</sub> <sup>-</sup>                  | 5 | 20                     |
| 8 <sup>b</sup>                                                                                                                                                                                                                                                                                                                                                                                                                                                                                                                    | EosinY-2Na                                                         | 5 | 16                     |

<sup>a</sup>Yields of isolated products. <sup>b</sup>Irradiated by green LED lamps.**Table S10.** Studying of nucleophiles

| $  \begin{array}{c}  \text{Cbz-Val-OH} + \text{Nu-H}  \end{array}  \xrightarrow[  \begin{array}{c}  \text{5 mol\% A, 30 mol\% PPh}_3 \\  \text{TMSD (3.0 equiv), InBr}_3 \text{ (2 mol\%)} \\  \text{2,4,6-collidine (1.5 equiv)} \\  \text{MeCN (0.1 M), blue LEDs, 65 }^\circ\text{C}  \end{array}  ]{  \begin{array}{c}  \text{1 mol\% PC} \cdot \text{PF}_6  \end{array}  }  \begin{array}{c}  \text{Cbz-NH-CH(CH}_3\text{)-C(=O)-Nu}  \end{array}  $ |                                                                                     |                                                                                      |                        |
|-----------------------------------------------------------------------------------------------------------------------------------------------------------------------------------------------------------------------------------------------------------------------------------------------------------------------------------------------------------------------------------------------------------------------------------------------------------|-------------------------------------------------------------------------------------|--------------------------------------------------------------------------------------|------------------------|
| entry                                                                                                                                                                                                                                                                                                                                                                                                                                                     | Nu-H                                                                                | product                                                                              | yield (%) <sup>a</sup> |
| 1                                                                                                                                                                                                                                                                                                                                                                                                                                                         | 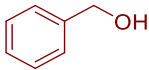 | 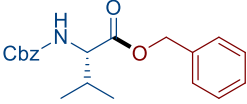 | 89                     |
| 2                                                                                                                                                                                                                                                                                                                                                                                                                                                         | 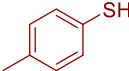 | 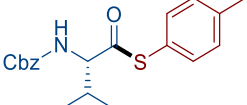 | 15                     |
| 3                                                                                                                                                                                                                                                                                                                                                                                                                                                         | 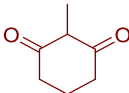 | 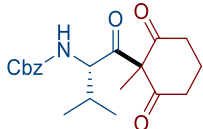 | 38                     |

<sup>a</sup>Yields of isolated products.

## 2.4 Comparative experiments

In our previous work, we reported a photocatalytic strategy for the formation of acyloxyphosphonium ions that enabled direct amidation. Hence, comparative experiments were conducted in Figure S4. The yield of the reaction between sterically

hindered Cbz-Val-OH and H-Ala-OMe·HCl improved from 41% to 86% with the triple catalytic system, indicating that the current process was more efficient.

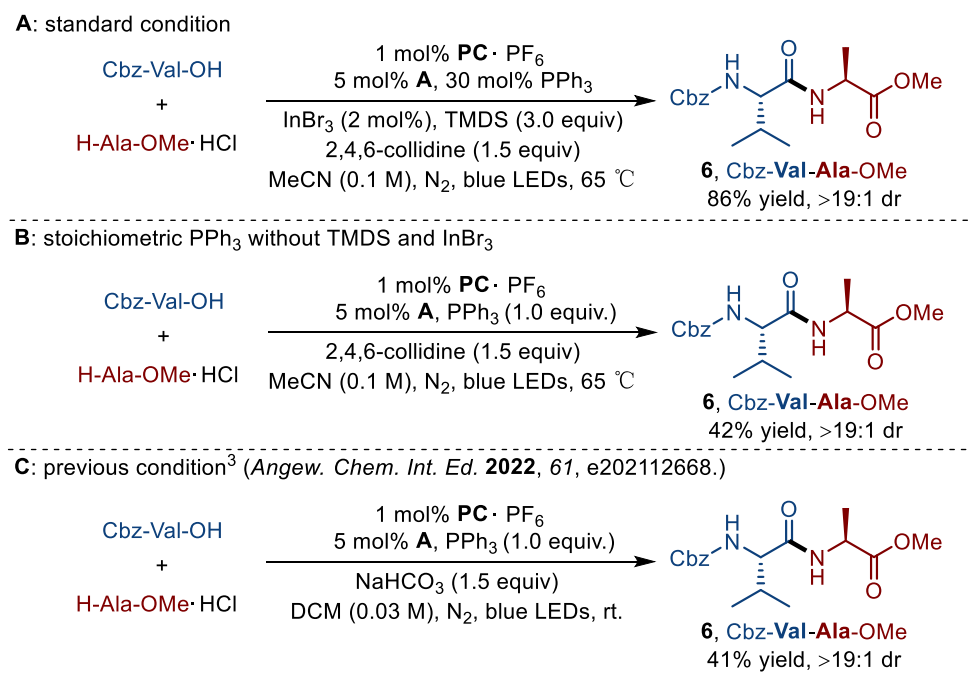

**Figure S4.** Comparative experiments

## 2.5 Characterization data

### Cbz-Val-Ala-OMe

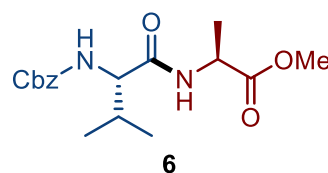

White solid, m.p.: 154 – 157 °C. <sup>1</sup>H NMR (400 MHz, CDCl<sub>3</sub>) δ 7.75 – 7.09 (m, 5H), 6.76 (d, *J* = 4.0 Hz, 1H), 5.60 (d, *J* = 8.0 Hz, 1H), 5.25 – 4.98 (m, 2H), 4.74 – 4.44 (m, 1H), 4.20 – 3.97 (m, 1H), 3.73 (s, 3H), 2.21 – 2.00 (m, 1H), 1.38 (d, *J* = 8.0 Hz, 3H), 1.08 – 0.79 (m, 6H). <sup>13</sup>C NMR (100 MHz, CDCl<sub>3</sub>) δ 173.1, 171.0, 156.4, 136.2, 128.5, 128.1, 128.0, 67.0, 60.1, 52.4, 48.0, 31.3, 19.0, 18.0, 17.8. HRMS-ESI: calcd for C<sub>17</sub>H<sub>25</sub>N<sub>2</sub>O<sub>5</sub><sup>+</sup> ([M + H]<sup>+</sup>) *m/z* 337.17580, found 337.17426.

### Cbz-Val-Ala-OEt

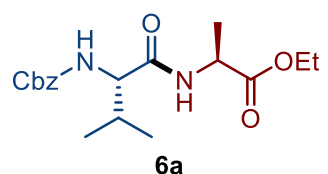

White solid, m.p.: 162 – 163 °C. <sup>1</sup>H NMR (400 MHz, CDCl<sub>3</sub>) δ 7.50 – 7.19 (m, 5H), 7.11 (d, *J* = 4.0 Hz, 1H), 5.86 (d, *J* = 8.0 Hz, 1H), 5.23 – 4.92 (m, 2H), 4.64 – 4.44 (m, 1H), 4.33 – 3.96 (m, 3H), 2.16 – 2.02 (m, 1H), 1.36 (d, *J* = 8.0 Hz, 3H), 1.25 (t, *J* = 8.0 Hz, 3H), 0.98 (d, *J* = 4.0 Hz, 3H), 0.94 (d, *J* = 8.0 Hz, 3H). <sup>13</sup>C NMR (100 MHz, CDCl<sub>3</sub>) δ 172.7, 171.2, 156.5, 136.3, 128.4, 128.0, 127.9, 66.8, 61.3, 60.1, 48.0, 31.4, 19.1, 18.0, 17.9, 14.0. HRMS-ESI: calcd for C<sub>18</sub>H<sub>27</sub>N<sub>2</sub>O<sub>5</sub><sup>+</sup> ([M + H]<sup>+</sup>) *m/z* 351.19145, found 351.19000.

**Cbz-Val-Ala-OBzl**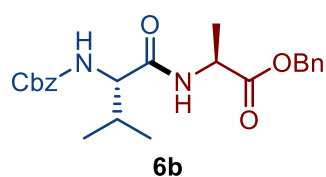

White solid, m.p.: 153 – 155 °C.  $^1\text{H}$  NMR (400 MHz,  $\text{CDCl}_3$ )  $\delta$  7.72 – 7.13 (m, 10H), 7.01 (d,  $J$  = 8.0 Hz, 1H), 5.73 (d,  $J$  = 8.0 Hz, 1H), 5.30 – 4.89 (m, 4H), 4.62 (p,  $J$  = 8.0 Hz, 1H), 4.25 – 3.94 (m, 1H), 2.15 – 1.95 (m, 1H), 1.35 (d,  $J$  = 8.0 Hz, 3H), 0.94 (d,  $J$  = 8.0 Hz, 3H), 0.90 (d,  $J$  = 8.0 Hz, 3H).  $^{13}\text{C}$  NMR (100 MHz,  $\text{CDCl}_3$ )  $\delta$  172.6, 171.2, 156.5, 136.3, 135.3, 128.6, 128.5, 128.4, 128.2, 128.1, 127.9, 67.1, 66.9, 60.1, 48.0, 31.4, 19.1, 18.0. HRMS-ESI: calcd for  $\text{C}_{23}\text{H}_{29}\text{N}_2\text{O}_5^+$  ( $[\text{M} + \text{H}]^+$ )  $m/z$  413.20710, found 413.20516.

**Cbz-Val-Ala-O<sup>t</sup>Bu**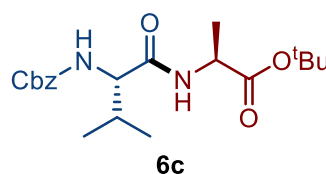

Yellow oil.  $^1\text{H}$  NMR (400 MHz,  $\text{CDCl}_3$ )  $\delta$  7.52 – 7.15 (m, 5H), 7.03 (d,  $J$  = 8.0 Hz, 1H), 5.86 (d,  $J$  = 12.0 Hz, 1H), 5.26 – 4.87 (m, 2H), 4.46 (p,  $J$  = 8.0 Hz, 1H), 4.25 – 4.01 (m, 1H), 2.20 – 1.98 (m, 1H), 1.44 (s, 9H), 1.33 (d,  $J$  = 4.0 Hz, 3H), 0.98 (d,  $J$  = 4.0 Hz, 3H), 0.93 (d,  $J$  = 4.0 Hz, 3H).  $^{13}\text{C}$  NMR (100 MHz,  $\text{CDCl}_3$ )  $\delta$  171.9, 171.0, 156.5, 136.4, 128.4, 128.0, 127.9, 81.7, 66.8, 60.1, 48.6, 31.4, 27.9, 19.2, 18.2, 17.9. HRMS-ESI: calcd for  $\text{C}_{20}\text{H}_{31}\text{N}_2\text{O}_5^+$  ( $[\text{M} + \text{H}]^+$ )  $m/z$  379.22275, found 379.22106.

**benzyl ((benzyloxy)carbonyl)-L-valinate**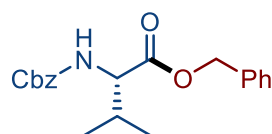

Colorless oil.  $^1\text{H}$  NMR (400 MHz,  $\text{CDCl}_3$ )  $\delta$  7.68 – 7.04 (m, 10H), 5.33 (d,  $J$  = 8.0 Hz, 1H), 5.22 – 4.97 (m, 4H), 4.36 (dd,  $J$  = 8.0, 4.0 Hz, 1H), 2.29 – 1.98 (m, 1H), 0.94 (d,  $J$  = 8.0 Hz, 3H), 0.84 (d,  $J$  = 8.0 Hz, 3H).  $^{13}\text{C}$  NMR (100 MHz,  $\text{CDCl}_3$ )  $\delta$  171.9, 156.3, 136.3, 135.3, 128.6, 128.5, 128.5, 128.4, 128.2, 128.1, 77.4, 77.3, 77.1, 76.8, 67.0, 59.0, 31.3, 19.0, 17.4. HRMS-ESI: calcd for  $\text{C}_{19}\text{H}_{22}\text{NO}_4^+$  ( $[\text{M} + \text{H}]^+$ )  $m/z$  342.16998, found 342.16962.

**S-(p-tolyl) (S)-2-(((benzyloxy)carbonyl)amino)-3-methylbutanethioate**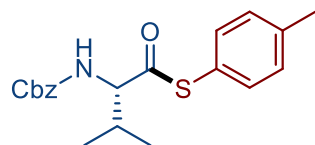

Colorless oil.  $^1\text{H}$  NMR (400 MHz,  $\text{CDCl}_3$ )  $\delta$  7.57 – 7.29 (m, 5H), 7.29 – 7.09 (m, 4H), 5.28 (d,  $J$  = 8.0 Hz, 1H), 5.17 (s, 2H), 4.59 – 4.21 (m, 1H), 2.51 – 2.18 (m, 4H), 1.04 (d,  $J$  = 8.0 Hz, 3H), 0.92 (d,  $J$  = 8.0 Hz, 3H).  $^{13}\text{C}$  NMR (100 MHz,  $\text{CDCl}_3$ )  $\delta$  199.1, 156.2, 139.9, 136.1, 134.5, 130.1, 128.6, 128.3, 128.1, 123.4, 67.3, 65.6, 31.2, 21.3, 19.4, 16.8. HRMS-ESI: calcd for  $\text{C}_{20}\text{H}_{23}\text{NO}_3\text{SNa}^+$  ( $[\text{M} + \text{H}]^+$ )  $m/z$  380.12909, found 380.12903.

**benzyl (S)-(3-methyl-1-(1-methyl-2,6-dioxocyclohexyl)-1-oxobutan-2-yl) carbamate**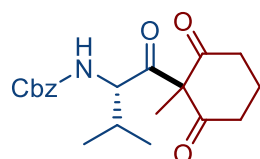

Colorless oil.  $^1\text{H}$  NMR (400 MHz,  $\text{CDCl}_3$ )  $\delta$  7.53 – 7.22 (m, 5H), 5.25 (d,  $J$  = 8.0 Hz, 1H), 5.13 (s, 2H), 4.45 – 4.21 (m, 1H), 2.72 – 2.15 (m, 5H), 2.12 – 1.87 (m, 2H), 1.66 (s, 3H), 1.07 (d,  $J$  = 8.0 Hz, 3H), 0.98 (d,  $J$  = 8.0 Hz, 3H).  $^{13}\text{C}$  NMR (100 MHz,  $\text{CDCl}_3$ )

$\delta$  199.0, 169.0, 163.8, 156.2, 136.0, 128.6, 128.3, 128.2, 125.1, 67.3, 59.2, 36.9, 30.9, 28.4, 20.8, 19.2, 17.4, 8.4. HRMS-ESI: calcd for  $C_{20}H_{25}NO_5Na^+$  ( $[M + H]^+$ )  $m/z$  382.16249, found 382.16196.

### 3. Dipeptide Synthesis

#### 3.1 General procedure

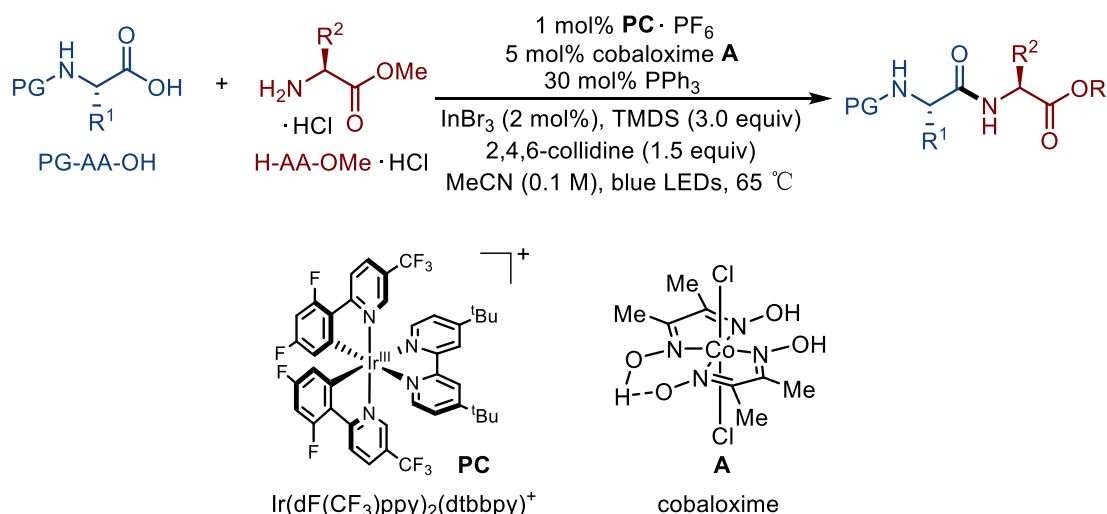

To an oven-dried reaction tube equipped with a stir bar was added protected amino acid (0.5 mmol, 1.0 equiv.), amino acid ester hydrochloride (0.75 mmol, 1.5 equiv.),  $PPh_3$  (0.15 mmol, 30 mol%),  $InBr_3$  (2 mol%),  $[Ir(dF(CF_3)ppy)_2(dtbbpy)]PF_6$  (1 mol%) and  $Co(dmgh)(dmgh_2)Cl_2$  (5 mol%). The tube was sealed and placed under nitrogen before MeCN (5 mL), TMSD (1.5 mmol, 3.0 equiv.) and 2,4,6-collidine (0.75 mmol, 1.5 equiv.) were added. Then the system was stirred under the irradiation of blue LED lamps at 65 °C for 12 to 20 h. Upon complete consumption of the starting material, the reaction mixture was concentrated and purified through column chromatography to afford the desired dipeptide product.

#### 3.2 Characterization data

##### Cbz-Val-Gly-OMe

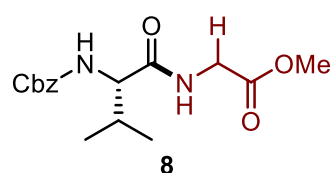

White solid, m.p.: 154 – 158 °C.  $^1H$  NMR (400 MHz,  $CDCl_3$ )  $\delta$  7.57 – 7.15 (m, 5H), 7.01 (s, 1H), 5.72 (d,  $J$  = 8.0 Hz, 1H), 5.22 – 4.95 (m, 2H), 4.28 – 4.09 (m, 1H), 4.10 – 3.85 (m, 2H), 3.71 (s, 3H), 2.27 – 1.99 (m, 1H), 1.07 – 0.77 (m, 6H).  $^{13}C$  NMR (100 MHz,  $CDCl_3$ )  $\delta$  171.9, 170.1, 156.5, 136.2, 128.5, 128.1, 127.9, 67.0, 60.2, 52.2, 41.0, 31.1, 19.1, 17.8. HRMS-ESI: calcd for  $C_{16}H_{23}N_2O_5^+$  ( $[M + H]^+$ )  $m/z$  323.16015, found 323.15857.

**Cbz-Val-Val-OMe**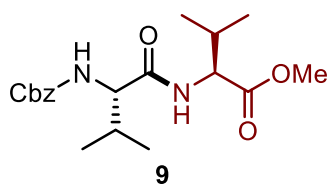

White solid, m.p.: 104 – 106 °C.  $^1\text{H}$  NMR (400 MHz,  $\text{CDCl}_3$ )  $\delta$  7.48 – 7.16 (m, 5H), 6.92 (d,  $J$  = 8.0 Hz, 1H), 5.70 (d,  $J$  = 8.0 Hz, 1H), 5.26 – 4.96 (m, 2H), 4.55 (dd,  $J$  = 8.0, 4.0 Hz, 1H), 4.37 – 4.02 (m, 1H), 3.71 (s, 3H), 2.29 – 1.92 (m, 2H), 1.18 – 0.55 (m, 12H).  $^{13}\text{C}$  NMR (100 MHz,  $\text{CDCl}_3$ )  $\delta$  172.3, 171.6, 156.5, 136.4, 128.4, 128.0, 127.8, 66.9, 60.2, 57.1, 52.0, 31.2, 31.0, 19.1, 18.9, 18.0, 17.8. HRMS-ESI: calcd for  $\text{C}_{19}\text{H}_{29}\text{N}_2\text{O}_5^+$  ( $[\text{M} + \text{H}]^+$ )  $m/z$  365.20710, found 365.20552.

**Cbz-Val-Phe-OMe**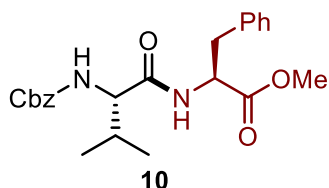

White solid, m.p.: 144 – 146 °C.  $^1\text{H}$  NMR (400 MHz,  $\text{CDCl}_3$ )  $\delta$  7.62 – 7.27 (m, 5H), 7.27 – 7.16 (m, 3H), 7.08 (d,  $J$  = 4.0 Hz, 2H), 6.67 (d,  $J$  = 8.0 Hz, 1H), 5.52 (d,  $J$  = 8.0 Hz, 1H), 5.29 – 4.98 (m, 2H), 4.89 (dd,  $J$  = 12.0, 4.0 Hz, 1H), 4.26 – 3.94 (m, 1H), 3.67 (s, 3H), 3.27 – 2.87 (m, 2H), 2.22 – 1.93 (m, 1H), 1.14 – 0.61 (m, 6H).  $^{13}\text{C}$  NMR (100 MHz,  $\text{CDCl}_3$ )  $\delta$  171.7, 171.1, 156.3, 136.3, 135.7, 129.2, 128.6, 128.5, 128.1, 128.0, 127.1, 67.0, 60.2, 53.2, 52.3, 37.9, 31.2, 19.1, 17.8. HRMS-ESI: calcd for  $\text{C}_{23}\text{H}_{29}\text{N}_2\text{O}_5^+$  ( $[\text{M} + \text{H}]^+$ )  $m/z$  413.20710, found 413.20530.

**Cbz-Val-Leu-OMe**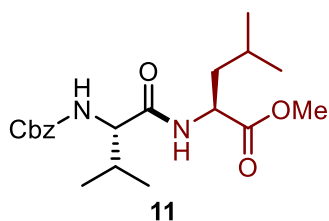

Light yellow solid, m.p.: 101 – 104 °C.  $^1\text{H}$  NMR (400 MHz,  $\text{CDCl}_3$ )  $\delta$  7.51 – 7.12 (m, 5H), 6.71 (d,  $J$  = 8.0 Hz, 1H), 5.60 (d,  $J$  = 8.0 Hz, 1H), 5.27 – 4.97 (m, 2H), 4.72 – 4.48 (m, 1H), 4.22 – 3.99 (m, 1H), 3.71 (s, 3H), 2.23 – 1.95 (m, 1H), 1.77 – 1.58 (m, 2H), 1.58 – 1.44 (m, 1H), 0.97 (d,  $J$  = 8.0 Hz, 3H), 0.95 – 0.74 (m, 9H).  $^{13}\text{C}$  NMR (100 MHz,  $\text{CDCl}_3$ )  $\delta$  173.2, 171.2, 156.4, 136.3, 128.5, 128.1, 127.9, 66.9, 60.1, 52.2, 50.7, 41.2, 31.4, 24.8, 22.7, 21.8, 19.0, 17.9. HRMS-ESI: calcd for  $\text{C}_{20}\text{H}_{31}\text{N}_2\text{O}_5^+$  ( $[\text{M} + \text{H}]^+$ )  $m/z$  379.22275, found 379.22109.

**Cbz-Val-Ile-OMe**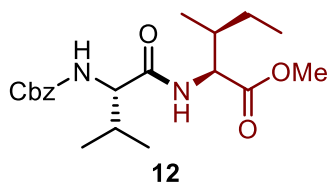

White solid, m.p.: 120 – 122 °C.  $^1\text{H}$  NMR (400 MHz,  $\text{CDCl}_3$ )  $\delta$  7.52 – 7.15 (m, 5H), 6.92 (d,  $J$  = 8.0 Hz, 1H), 5.71 (d,  $J$  = 12.0 Hz, 1H), 5.27 – 4.95 (m, 2H), 4.59 (dd,  $J$  = 8.0, 4.0 Hz, 1H), 4.29 – 3.99 (m, 1H), 3.71 (s, 3H), 2.19 – 1.99 (m, 1H), 1.96 – 1.79 (m, 1H), 1.51 – 1.32 (m, 1H), 1.24 – 1.09 (m, 1H), 1.05 – 0.69 (m, 12H).  $^{13}\text{C}$  NMR (100 MHz,  $\text{CDCl}_3$ )  $\delta$  172.2, 171.4, 156.4, 136.3, 128.4, 128.0, 127.8, 66.9, 60.1, 56.4, 52.0, 37.6, 31.3, 25.1, 19.1, 17.9, 15.4, 11.5. HRMS-ESI: calcd for  $\text{C}_{20}\text{H}_{31}\text{N}_2\text{O}_5^+$  ( $[\text{M} + \text{H}]^+$ )  $m/z$  379.22275, found 379.22107.

**Cbz-Gly-Ala-OMe**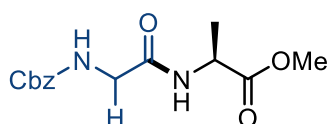**13**

Light yellow solid, m.p.: 89 – 92 °C.  $^1\text{H}$  NMR (400 MHz,  $\text{CDCl}_3$ )  $\delta$  7.56 – 7.19 (m, 5H), 7.08 (d,  $J$  = 8.0 Hz, 1H), 5.95 (s, 1H), 5.10 (s, 2H), 4.56 (p,  $J$  = 8.0 Hz, 1H), 3.89 (d,  $J$  = 4.0 Hz, 2H), 3.69 (s, 3H), 1.36 (d,  $J$  = 8.0 Hz, 3H).  $^{13}\text{C}$  NMR (100 MHz,  $\text{CDCl}_3$ )  $\delta$  173.3, 169.0, 156.7, 136.2, 128.5, 128.1, 128.0, 67.0, 52.4, 48.0, 44.3, 17.9. HRMS-ESI: calcd for  $\text{C}_{14}\text{H}_{19}\text{N}_2\text{O}_5^+$  ( $[\text{M} + \text{H}]^+$ )  $m/z$  295.12885, found 295.12753.

**Cbz-Ala-Ala-OMe**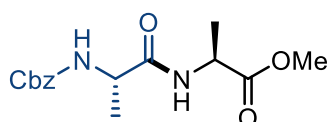**14**

White solid, m.p.: 90 – 93 °C.  $^1\text{H}$  NMR (400 MHz,  $\text{CDCl}_3$ )  $\delta$  7.45 – 7.17 (m, 5H), 7.06 (d,  $J$  = 4.0 Hz, 1H), 5.81 (d,  $J$  = 8.0 Hz, 1H), 5.21 – 4.98 (m, 2H), 4.55 (p,  $J$  = 8.0 Hz, 1H), 4.44 – 4.20 (m, 1H), 3.71 (s, 3H), 1.36 (t,  $J$  = 4.0 Hz, 6H).  $^{13}\text{C}$  NMR (100 MHz,  $\text{CDCl}_3$ )  $\delta$  173.2, 172.2, 156.0, 136.2, 128.5, 128.1, 127.9, 66.9, 52.4, 50.3, 48.0, 18.8, 18.0. HRMS-ESI: calcd for  $\text{C}_{15}\text{H}_{21}\text{N}_2\text{O}_5^+$  ( $[\text{M} + \text{H}]^+$ )  $m/z$  309.14450, found 309.14284.

**Cbz-Phe-Ala-OMe**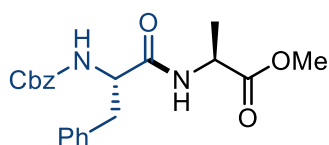**15**

White solid, m.p.: 128 – 131 °C.  $^1\text{H}$  NMR (400 MHz,  $\text{CDCl}_3$ )  $\delta$  7.54 – 7.03 (m, 10H), 6.75 (d,  $J$  = 8.0 Hz, 1H), 5.62 (d,  $J$  = 8.0 Hz, 1H), 5.16 – 4.95 (m, 2H), 4.65 – 4.37 (m, 2H), 3.68 (s, 3H), 3.15 – 2.93 (m, 2H), 1.31 (d,  $J$  = 8.0 Hz, 3H).  $^{13}\text{C}$  NMR (100 MHz,  $\text{CDCl}_3$ )  $\delta$  172.9, 170.8, 156.0, 136.3, 136.2, 129.3, 128.6, 128.5, 128.1, 127.9, 127.0, 67.0, 56.0, 52.4, 48.1, 38.6, 18.1. HRMS-ESI: calcd for  $\text{C}_{21}\text{H}_{25}\text{N}_2\text{O}_5^+$  ( $[\text{M} + \text{H}]^+$ )  $m/z$  385.17580, found 385.17407.

**Cbz-Leu-Ala-OMe**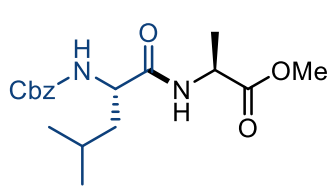**16**

White solid, m.p.: 93 – 95 °C.  $^1\text{H}$  NMR (400 MHz,  $\text{CDCl}_3$ )  $\delta$  7.45 – 7.28 (m, 5H), 6.86 (d,  $J$  = 8.0 Hz, 1H), 5.51 (d,  $J$  = 8.0 Hz, 1H), 5.26 – 4.99 (m, 2H), 4.56 (p,  $J$  = 8.0 Hz, 1H), 4.42 – 4.13 (m, 1H), 3.74 (s, 3H), 1.83 – 1.60 (m, 2H), 1.58 – 1.47 (m, 1H), 1.37 (d,  $J$  = 8.0 Hz, 3H), 1.07 – 0.75 (m, 6H).  $^{13}\text{C}$  NMR (100 MHz,  $\text{CDCl}_3$ )  $\delta$  173.2, 172.0, 156.2, 136.2, 128.5, 128.1, 128.0, 66.9, 53.3, 52.4, 48.0, 41.6, 24.6, 22.9, 21.9, 18.0. HRMS-ESI: calcd for  $\text{C}_{18}\text{H}_{27}\text{N}_2\text{O}_5^+$  ( $[\text{M} + \text{H}]^+$ )  $m/z$  351.19145, found 351.18976.

**Cbz-Ile-Ala-OMe**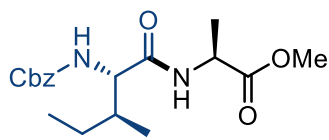**17**

White solid, m.p.: 119 – 122 °C.  $^1\text{H}$  NMR (400 MHz,  $\text{CDCl}_3$ )  $\delta$  7.58 – 7.17 (m, 5H), 7.08 (d,  $J$  = 8.0 Hz, 1H), 5.80 (d,  $J$  = 8.0 Hz, 1H), 5.24 – 4.91 (m, 2H), 4.68 – 4.40 (m, 1H), 4.15 (t,  $J$  = 8.0 Hz, 1H), 3.71 (s, 3H), 1.95 – 1.72 (m, 1H), 1.64 – 1.46 (m, 1H), 1.36 (d,  $J$  = 8.0 Hz, 3H), 1.21 – 1.08 (m, 1H), 1.02 – 0.67 (m, 6H).  $^{13}\text{C}$  NMR (100 MHz,  $\text{CDCl}_3$ )  $\delta$  173.1, 171.3, 156.4, 136.3,

128.4, 128.0, 127.9, 66.9, 59.4, 52.3, 47.9, 37.6, 24.7, 17.8, 15.2, 11.2. HRMS-ESI: calcd for  $C_{18}H_{27}N_2O_5^+$  ( $[M + H]^+$ )  $m/z$  351.19145, found 351.19052.

### Cbz-Val-Tyr(<sup>t</sup>Bu)-OMe

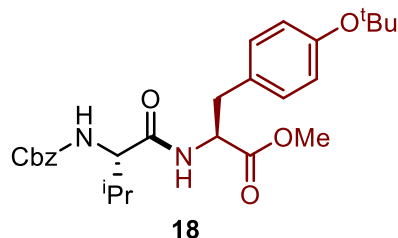

White solid, m.p.: 116 – 118 °C.  $^1H$  NMR (400 MHz,  $CDCl_3$ )  $\delta$  7.45 – 7.16 (m, 5H), 7.01 (d,  $J$  = 8.0 Hz, 3H), 6.87 (d,  $J$  = 8.0 Hz, 2H), 5.79 (d,  $J$  = 12.0 Hz, 1H), 5.29 – 4.93 (m, 2H), 4.84 (dd,  $J$  = 12.0, 8.0 Hz, 1H), 4.30 – 3.97 (m, 1H), 3.61 (s, 3H), 3.02 (d,  $J$  = 8.0 Hz, 2H), 2.17 – 1.95 (m, 1H), 1.30 (s, 9H), 1.02 – 0.69 (m, 6H).  $^{13}C$  NMR (100 MHz,  $CDCl_3$ )  $\delta$  171.9, 171.2, 156.4, 154.4, 136.4, 130.6, 129.6, 128.4, 128.0, 127.9, 124.1, 78.2, 66.9, 60.2, 53.4, 52.1, 37.4, 31.2, 28.8, 19.0, 17.9. HRMS-ESI: calcd for  $C_{27}H_{37}N_2O_6^+$  ( $[M + H]^+$ )  $m/z$  485.26461, found 485.26261.

### Cbz-Val-Ser(<sup>t</sup>Bu)-OMe

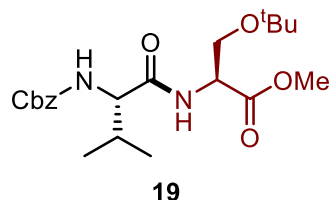

Yellow oil.  $^1H$  NMR (400 MHz,  $CDCl_3$ )  $\delta$  7.50 – 7.17 (m, 5H), 6.70 (d,  $J$  = 8.0 Hz, 1H), 5.62 (d,  $J$  = 8.0 Hz, 1H), 5.30 – 4.96 (m, 2H), 4.81 – 4.61 (m, 1H), 4.24 – 4.00 (m, 1H), 3.81 (dd,  $J$  = 8.0, 4.0 Hz, 1H), 3.72 (s, 3H), 3.54 (dd,  $J$  = 8.0, 4.0 Hz, 1H), 2.22 – 2.06 (m, 1H), 1.12 (s, 9H), 1.02 – 0.75 (m, 6H).  $^{13}C$  NMR (100 MHz,  $CDCl_3$ )  $\delta$  171.0, 170.6, 156.3, 136.3, 128.4, 128.0, 127.9, 73.4, 66.9, 61.7, 60.0, 52.8, 52.3, 31.6, 27.2, 19.0, 17.6. HRMS-ESI: calcd for  $C_{21}H_{33}N_2O_6^+$  ( $[M + H]^+$ )  $m/z$  409.23331, found 409.23149.

### Cbz-Val-Thr(<sup>t</sup>Bu)-OMe

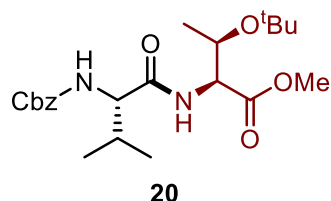

Light yellow oil.  $^1H$  NMR (400 MHz,  $CDCl_3$ )  $\delta$  7.45 – 7.23 (m, 5H), 6.64 (d,  $J$  = 8.0 Hz, 1H), 5.52 (d,  $J$  = 8.0 Hz, 1H), 5.22 – 5.01 (m, 2H), 4.49 (dd,  $J$  = 8.0, 4.0 Hz, 1H), 4.32 – 4.07 (m, 2H), 3.68 (s, 3H), 2.22 (dd,  $J$  = 12.0, 8.0 Hz, 1H), 1.16 (d,  $J$  = 4.0 Hz, 3H), 1.10 (s, 9H), 1.00 (d,  $J$  = 4.0 Hz, 3H), 0.95 (d,  $J$  = 4.0 Hz, 3H).  $^{13}C$  NMR (100 MHz,  $CDCl_3$ )  $\delta$  171.4, 170.9, 156.2, 136.3, 128.5, 128.1, 128.0, 74.0, 67.2, 66.9, 60.2, 57.8, 52.1, 31.1, 28.2, 28.2, 21.0, 19.2, 17.4. HRMS-ESI: calcd for  $C_{22}H_{35}N_2O_6^+$  ( $[M + H]^+$ )  $m/z$  423.24896, found 423.24698.

### Cbz-Val-Asp(OMe)-OMe

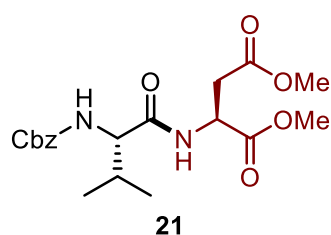

White solid, m.p.: 135 – 137 °C.  $^1H$  NMR (400 MHz,  $CDCl_3$ )  $\delta$  7.73 – 6.94 (m, 6H), 5.78 (d,  $J$  = 12.0 Hz, 1H), 5.28 – 4.98 (m, 2H), 4.98 – 4.73 (m, 1H), 4.16 (dd,  $J$  = 8.0, 4.0 Hz, 1H), 3.89 – 3.42 (m, 6H), 2.99 (dd,  $J$  = 16.0, 4.0 Hz, 1H), 2.81 (dd,  $J$  = 16.0, 4.0 Hz, 1H), 2.24 – 1.94 (m, 1H), 1.19 – 0.66 (m, 6H).  $^{13}C$  NMR (100 MHz,  $CDCl_3$ )  $\delta$  171.4, 171.3, 171.0, 156.4, 136.3, 128.4, 128.0, 127.9, 66.8, 60.0, 52.7,

52.0, 48.3, 35.9, 31.5, 19.0, 17.7. HRMS-ESI: calcd for  $C_{19}H_{27}N_2O_7^+$  ( $[M + H]^+$ )  $m/z$  395.18128, found 395.17965.

### Cbz-Val-Glu(OMe)-OMe

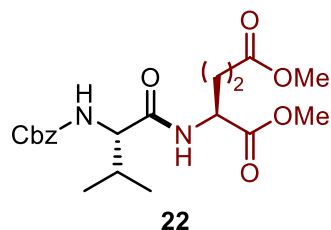

White solid, m.p.: 124 – 128 °C.  $^1H$  NMR (400 MHz,  $CDCl_3$ )  $\delta$  7.53 – 7.22 (m, 5H), 7.12 (d,  $J$  = 8.0 Hz, 1H), 5.70 (d,  $J$  = 8.0 Hz, 1H), 5.27 – 4.95 (m, 2H), 4.70 – 4.50 (m, 1H), 4.12 (dd,  $J$  = 8.0, 8.0 Hz, 1H), 3.90 – 3.45 (m, 6H), 2.54 – 2.28 (m, 2H), 2.27 – 2.14 (m, 1H), 2.14 – 2.04 (m, 1H), 2.04 – 1.90 (m, 1H), 1.08 – 0.76 (m, 6H).  $^{13}C$  NMR (100 MHz,  $CDCl_3$ )  $\delta$  173.2, 172.0, 171.5, 156.4, 136.3, 128.4, 128.1, 127.9, 66.9, 60.1, 52.4, 51.8, 51.6, 31.3, 30.0, 26.9, 19.0, 17.8. HRMS-ESI: calcd for  $C_{20}H_{29}N_2O_7^+$  ( $[M + H]^+$ )  $m/z$  409.19693, found 409.19496.

### Cbz-Tyr(<sup>t</sup>Bu)-Ala-OMe

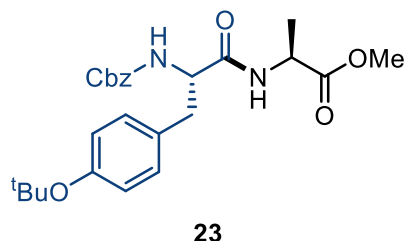

White solid, m.p.: 115 – 118 °C.  $^1H$  NMR (400 MHz,  $CDCl_3$ )  $\delta$  7.46 – 7.23 (m, 5H), 7.16 – 7.02 (m, 2H), 6.96 – 6.81 (m, 2H), 6.65 (d,  $J$  = 8.0 Hz, 1H), 5.58 (d,  $J$  = 8.0 Hz, 1H), 5.15 – 4.94 (m, 2H), 4.61 – 4.32 (m, 2H), 3.69 (s, 3H), 3.01 (d,  $J$  = 8.0 Hz, 2H), 1.45 – 1.18 (m, 12H).  $^{13}C$  NMR (100 MHz,  $CDCl_3$ )  $\delta$  172.8, 170.6, 156.0, 154.3, 136.2, 131.1, 129.8, 128.5, 128.1, 128.0, 124.2, 78.3, 67.0, 56.0, 52.4, 48.1, 37.9, 28.8, 18.1. HRMS-ESI: calcd for  $C_{25}H_{33}N_2O_6^+$  ( $[M + H]^+$ )  $m/z$  457.23331, found 457.23108.

### Cbz-Ser(<sup>t</sup>Bu)-Ala-OMe

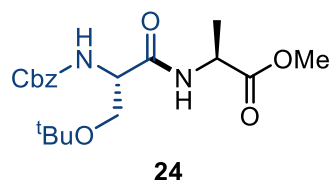

White oil.  $^1H$  NMR (400 MHz,  $CDCl_3$ )  $\delta$  7.42 (d,  $J$  = 4.0 Hz, 1H), 7.38 – 7.09 (m, 5H), 5.86 (d,  $J$  = 4.0 Hz, 1H), 5.26 – 4.97 (m, 2H), 4.57 (p,  $J$  = 8.0 Hz, 1H), 4.26 (s, 1H), 3.79 (d,  $J$  = 4.0 Hz, 1H), 3.72 (s, 3H), 3.40 (t,  $J$  = 8.0 Hz, 1H), 1.39 (d,  $J$  = 8.0 Hz, 3H), 1.20 (s, 9H).  $^{13}C$  NMR (100 MHz,  $CDCl_3$ )  $\delta$  172.9, 169.9, 156.0, 136.2, 128.4, 128.1, 128.0, 74.1, 66.9, 61.7, 54.3, 52.3, 48.1, 27.2, 18.3. HRMS-ESI: calcd for  $C_{19}H_{29}N_2O_6^+$  ( $[M + H]^+$ )  $m/z$  381.20201, found 381.20036.

### Cbz-Thr(<sup>t</sup>Bu)-Ala-OMe

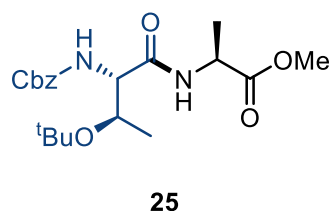

White oil.  $^1H$  NMR (400 MHz,  $CDCl_3$ )  $\delta$  7.72 (d,  $J$  = 8.0 Hz, 1H), 7.46 – 7.18 (m, 5H), 5.99 (d,  $J$  = 4.0 Hz, 1H), 5.27 – 4.99 (m, 2H), 4.52 (p,  $J$  = 4.0 Hz, 1H), 4.34 – 3.99 (m, 2H), 3.73 (s, 3H), 1.41 (d,  $J$  = 8.0 Hz, 3H), 1.36 – 0.87 (m, 12H).  $^{13}C$  NMR (100 MHz,  $CDCl_3$ )  $\delta$  172.9, 169.0, 156.0, 136.3, 128.5, 128.0, 127.9, 75.3, 66.7, 58.5, 52.2, 48.2, 28.1, 18.2, 16.7. HRMS-ESI: calcd for  $C_{20}H_{31}N_2O_6^+$  ( $[M + H]^+$ )  $m/z$  395.21766, found 395.21660.

**Cbz-Asp(OBzl)-Ala-OMe**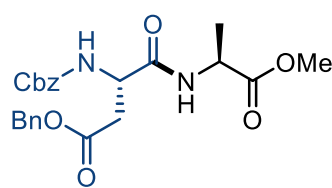**26**

White solid, m.p.: 127 – 129 °C.  $^1\text{H}$  NMR (400 MHz,  $\text{CDCl}_3$ )  $\delta$  7.77 – 7.14 (m, 10H), 7.05 (d,  $J$  = 8.0 Hz, 1H), 6.02 (d,  $J$  = 8.0 Hz, 1H), 5.34 – 4.87 (m, 4H), 4.75 – 4.57 (m, 1H), 4.57 – 4.42 (m, 1H), 3.69 (s, 3H), 3.04 (dd,  $J$  = 16.0, 4.0 Hz, 1H), 2.75 (dd,  $J$  = 16.0, 4.0 Hz, 1H), 1.35 (d,  $J$  = 4.0 Hz, 3H).  $^{13}\text{C}$  NMR (100 MHz,  $\text{CDCl}_3$ )  $\delta$  172.9, 171.6, 170.0, 156.0, 136.0, 135.3, 128.6, 128.6, 128.4, 128.3, 128.2, 67.3, 66.9, 52.4, 50.9, 48.3, 36.4, 18.0. HRMS-ESI: calcd for  $\text{C}_{23}\text{H}_{27}\text{N}_2\text{O}_7^+$  ( $[\text{M} + \text{H}]^+$ )  $m/z$  443.18128, found 443.17947.

**Cbz-Glu(OBzl)-Ala-OMe**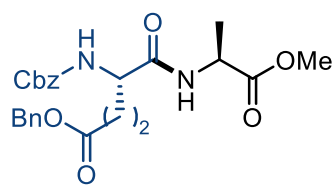**27**

White solid, m.p.: 127 – 128 °C.  $^1\text{H}$  NMR (400 MHz,  $\text{CDCl}_3$ )  $\delta$  7.69 – 7.17 (m, 10H), 7.09 (d,  $J$  = 8.0 Hz, 1H), 5.92 (d,  $J$  = 8.0 Hz, 1H), 5.25 – 4.90 (m, 4H), 4.63 – 4.46 (m, 1H), 4.37 (dd,  $J$  = 12.0, 8.0 Hz, 1H), 3.68 (s, 3H), 2.69 – 2.40 (m, 2H), 2.28 – 2.07 (m, 1H), 2.05 – 1.86 (m, 1H), 1.34 (d,  $J$  = 8.0 Hz, 3H).  $^{13}\text{C}$  NMR (100 MHz,  $\text{CDCl}_3$ )  $\delta$  173.1, 173.0, 171.0, 156.2, 136.2, 135.7, 128.6, 128.5, 128.3, 128.2, 128.1, 128.0, 67.0, 66.5, 53.8, 52.4, 48.1, 30.2, 28.2, 17.8. HRMS-ESI: calcd for  $\text{C}_{24}\text{H}_{29}\text{N}_2\text{O}_7^+$  ( $[\text{M} + \text{H}]^+$ )  $m/z$  457.19693, found 457.19484.

**Fmoc-Asn(Trt)-Ala-OMe**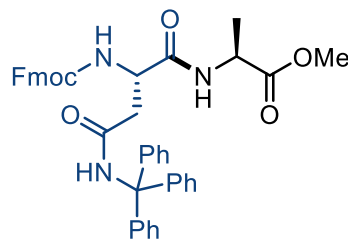**28**

White solid, m.p.: 207 – 209 °C.  $^1\text{H}$  NMR (400 MHz,  $\text{CDCl}_3$ )  $\delta$  7.71 (d,  $J$  = 8.0 Hz, 2H), 7.53 (t,  $J$  = 8.0 Hz, 2H), 7.40 – 7.29 (m, 3H), 7.27 – 7.01 (m, 18H), 6.63 (d,  $J$  = 8.0 Hz, 1H), 4.71 – 4.51 (m, 1H), 4.45 – 4.20 (m, 3H), 4.13 (t,  $J$  = 8.0 Hz, 1H), 3.63 (s, 3H), 3.04 (dd,  $J$  = 16.0, 4.0 Hz, 1H), 2.65 (dd,  $J$  = 16.0, 8.0 Hz, 1H), 1.28 (d,  $J$  = 8.0 Hz, 3H).  $^{13}\text{C}$  NMR (100 MHz,  $\text{CDCl}_3$ )  $\delta$  173.0, 171.1, 170.6, 156.3, 144.3, 143.9, 143.7, 141.3, 141.3, 128.8, 128.0, 127.8, 127.1, 127.1, 125.3, 120.0, 70.9, 67.3, 52.5, 51.3, 48.5, 47.1, 38.5, 17.6. HRMS-ESI: calcd for  $\text{C}_{42}\text{H}_{40}\text{N}_3\text{O}_6^+$  ( $[\text{M} + \text{H}]^+$ )  $m/z$  682.29116, found 682.29069.

**Fmoc-Gln(Trt)-Ala-OMe**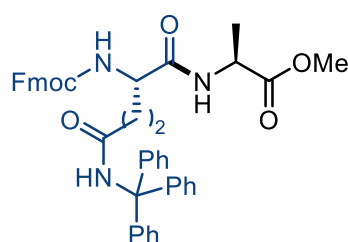**29**

White solid, m.p.: 141 – 144 °C.  $^1\text{H}$  NMR (400 MHz,  $\text{CDCl}_3$ )  $\delta$  7.70 (d,  $J$  = 8.0 Hz, 2H), 7.53 (d,  $J$  = 8.0 Hz, 2H), 7.39 – 7.29 (m, 3H), 7.25 – 6.92 (m, 18H), 6.10 (d,  $J$  = 8.0 Hz, 1H), 4.48 – 4.35 (m, 1H), 4.35 – 4.24 (m, 2H), 4.23 – 4.04 (m, 2H), 3.59 (s, 3H), 2.62 – 2.26 (m, 2H), 2.15 – 1.88 (m, 2H), 1.22 (d,  $J$  = 8.0 Hz, 3H).  $^{13}\text{C}$  NMR (100 MHz,  $\text{CDCl}_3$ )  $\delta$  173.1, 172.1, 171.3, 156.2, 144.6, 143.9, 143.8, 141.3, 141.3, 128.7, 128.0, 127.7, 127.1, 127.1, 125.2, 120.0, 70.6, 67.0, 53.6, 52.4, 48.2, 47.1, 33.2, 29.6, 17.4. HRMS-ESI:

calcd for  $C_{43}H_{42}N_3O_6^+$  ( $[M + H]^+$ )  $m/z$  696.30681, found 696.30354.

### Cbz-Lys(Cbz)-Ala-OMe

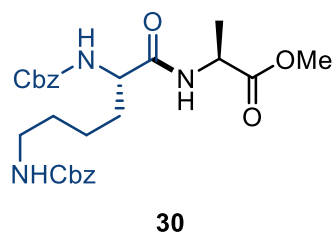

White solid, m.p.: 145 – 148 °C.  $^1H$  NMR (400 MHz,  $CDCl_3$ )  $\delta$  7.59 – 7.18 (m, 10H), 7.09 (d,  $J$  = 8.0 Hz, 1H), 5.89 (d,  $J$  = 4.0 Hz, 1H), 5.46 – 5.23 (m, 1H), 5.22 – 4.91 (m, 4H), 4.52 (p,  $J$  = 8.0 Hz, 1H), 4.33 – 4.12 (m, 1H), 3.65 (s, 3H), 3.15 (d,  $J$  = 4.0 Hz, 2H), 1.91 – 1.56 (m, 2H), 1.55 – 1.41 (m, 2H), 1.41 – 1.19 (m, 5H).  $^{13}C$  NMR (100 MHz,  $CDCl_3$ )  $\delta$  173.2, 171.7, 156.7, 156.3, 136.6, 136.2, 128.5, 128.4, 128.1, 128.1, 128.0, 128.0, 66.9, 66.5, 54.4, 52.4, 48.0, 40.3, 32.2, 29.2, 22.0, 17.7. HRMS-ESI: calcd for  $C_{26}H_{34}N_3O_7^+$  ( $[M + H]^+$ )  $m/z$  500.23913, found 500.23712.

### Boc-His(Trt)-Ala-OMe

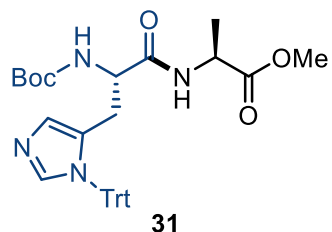

Light yellow oil.  $^1H$  NMR (400 MHz,  $CDCl_3$ )  $\delta$  7.49 (d,  $J$  = 8.0 Hz, 1H), 7.37 (s, 1H), 7.34 – 7.23 (m, 9H), 7.19 – 7.02 (m, 6H), 6.67 (s, 1H), 6.50 (d,  $J$  = 4.0 Hz, 1H), 4.66 – 4.30 (m, 2H), 3.65 (s, 3H), 3.18 – 3.00 (m, 1H), 2.94 (dd,  $J$  = 16.0, 4.0 Hz, 1H), 1.44 (s, 9H), 1.29 (d,  $J$  = 8.0 Hz, 3H).  $^{13}C$  NMR (100 MHz,  $CDCl_3$ )  $\delta$  173.0, 171.3, 155.7, 142.3, 138.5, 136.7, 129.7, 128.0, 128.0, 119.5, 79.6, 75.2, 54.4, 52.2, 48.0, 30.2, 28.3, 18.3. HRMS-ESI: calcd for  $C_{34}H_{39}N_4O_5^+$  ( $[M + H]^+$ )  $m/z$  583.29150, found 583.28876.

### Cbz-Trp-Ala-OMe

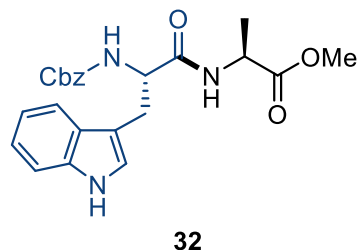

Yellow oil.  $^1H$  NMR (400 MHz,  $CDCl_3$ )  $\delta$  8.56 (s, 1H), 7.59 (d,  $J$  = 8.0 Hz, 1H), 7.40 – 7.18 (m, 6H), 7.13 (t,  $J$  = 8.0 Hz, 1H), 7.03 (t,  $J$  = 8.0 Hz, 1H), 6.96 (s, 1H), 6.64 (d,  $J$  = 8.0 Hz, 1H), 5.73 (d,  $J$  = 8.0 Hz, 1H), 5.18 – 4.88 (m, 2H), 4.67 – 4.46 (m, 1H), 4.42 (p,  $J$  = 8.0 Hz, 1H), 3.57 (s, 3H), 3.26 (dd,  $J$  = 12.0, 4.0 Hz, 1H), 3.16 (dd,  $J$  = 16.0, 4.0 Hz, 1H), 1.19 (d,  $J$  = 4.0 Hz, 3H).  $^{13}C$  NMR (100 MHz,  $CDCl_3$ )  $\delta$  173.0, 171.3, 156.2, 136.3, 128.5, 128.2, 128.0, 127.5, 123.6, 122.0, 119.5, 118.7, 111.4, 109.9, 67.0, 55.5, 52.4, 48.2, 28.6, 18.0. HRMS-ESI: calcd for  $C_{23}H_{26}N_3O_5^+$  ( $[M + H]^+$ )  $m/z$  424.18670, found 424.18558.

### Cbz-Val-Lys(Cbz)-OMe

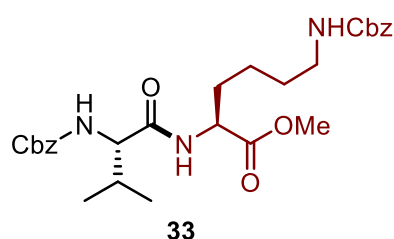

White solid, m.p.: 122 – 126 °C.  $^1H$  NMR (400 MHz,  $CDCl_3$ )  $\delta$  7.64 – 7.20 (m, 10H), 7.11 (d,  $J$  = 8.0 Hz, 1H), 6.02 – 5.51 (m, 2H), 5.22 – 4.88 (m, 4H), 4.64 – 4.38 (m, 1H), 4.33 – 4.09 (m, 1H), 3.69 (s, 3H), 3.33 – 2.91 (m, 2H), 2.16 – 1.95 (m, 1H), 1.81 – 1.53 (m, 2H), 1.51 – 1.37 (m, 2H), 1.33 – 1.24 (m, 2H), 0.93 (d,  $J$  = 8.0 Hz, 3H), 0.82 (d,  $J$  = 8.0 Hz, 3H).  $^{13}C$  NMR

(100 MHz, CDCl<sub>3</sub>)  $\delta$  172.5, 172.0, 156.8, 156.7, 136.5, 136.2, 128.5, 128.5, 128.4, 128.1, 128.1, 67.1, 66.7, 59.9, 52.3, 40.3, 31.5, 31.4, 29.3, 22.5, 19.1, 17.5, 14.1. HRMS-ESI: calcd for C<sub>28</sub>H<sub>28</sub>N<sub>3</sub>O<sub>7</sub><sup>+</sup> ([M + H]<sup>+</sup>)  $m/z$  528.27043, found 528.26819.

### Cbz-Val-His(Trt)-OMe

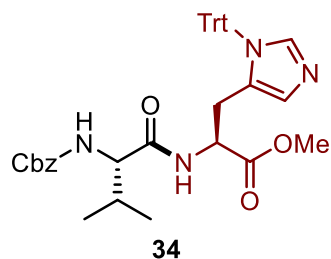

Yellow oil. <sup>1</sup>H NMR (400 MHz, CDCl<sub>3</sub>)  $\delta$  7.95 – 7.59 (m, 2H), 7.50 (s, 1H), 7.42 – 7.29 (m, 9H), 7.27 – 7.19 (m, 4H), 7.18 – 6.96 (m, 6H), 6.66 (s, 1H), 5.94 (d,  $J$  = 12.0 Hz, 1H), 5.19 – 4.90 (m, 2H), 4.89 – 4.74 (m, 1H), 4.25 (dd,  $J$  = 8.0, 4.0 Hz, 1H), 3.60 (s, 3H), 3.07 (d,  $J$  = 4.0 Hz, 2H), 2.36 – 2.07 (m, 1H), 0.98 (d,  $J$  = 4.0 Hz, 3H), 0.89 (d,  $J$  = 8.0 Hz, 3H).

<sup>13</sup>C NMR (100 MHz, CDCl<sub>3</sub>)  $\delta$  171.2, 171.2, 156.3, 143.2, 141.7, 138.0, 136.4, 135.3, 129.6, 128.4, 128.3, 128.2, 128.2, 127.9, 127.8, 126.2, 124.2, 120.0, 119.1, 110.1, 75.9, 66.7, 59.9, 52.6, 52.2, 31.4, 29.3, 19.1, 17.5. HRMS-ESI: calcd for C<sub>39</sub>H<sub>41</sub>N<sub>4</sub>O<sub>5</sub><sup>+</sup> ([M + H]<sup>+</sup>)  $m/z$  645.30715, found 645.30408.

### Cbz-Val-Trp-OMe

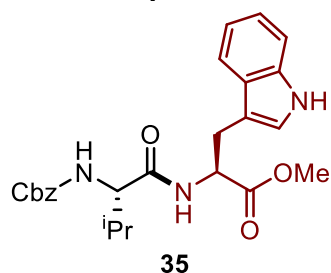

White solid, m.p.: 152 – 154 °C. <sup>1</sup>H NMR (400 MHz, CDCl<sub>3</sub>)  $\delta$  8.37 (s, 1H), 7.47 (d,  $J$  = 8.0 Hz, 1H), 7.35 – 7.23 (m, 4H), 7.23 – 7.16 (m, 2H), 7.23 – 7.16 (m, 1H), 7.09 – 7.01 (m, 1H), 6.95 (d,  $J$  = 8.0 Hz, 1H), 6.87 – 6.76 (m, 1H), 5.59 (d,  $J$  = 12.0 Hz, 1H), 4.99 (d,  $J$  = 12.0 Hz, 1H), 4.93 (dd,  $J$  = 12.0, 4.0 Hz, 1H), 4.76 (d,  $J$  = 12.0 Hz, 1H), 4.29 (dd,  $J$  = 8.0, 4.0 Hz, 1H), 3.61 (s, 3H), 3.39 – 3.06 (m, 2H), 2.16 –

1.97 (m, 1H), 1.07 – 0.60 (m, 6H). <sup>13</sup>C NMR (100 MHz, CDCl<sub>3</sub>)  $\delta$  172.1, 171.7, 156.6, 136.2, 136.1, 128.5, 128.1, 128.1, 127.3, 123.4, 122.1, 119.5, 118.3, 111.4, 109.1, 67.0, 59.8, 52.8, 52.4, 31.6, 27.6, 19.1, 17.5. HRMS-ESI: calcd for C<sub>20</sub>H<sub>30</sub>N<sub>3</sub>O<sub>5</sub><sup>+</sup> ([M + H]<sup>+</sup>)  $m/z$  452.21800, found 452.21585.

### Boc-Arg(Cbz)<sub>2</sub>-Ala-OMe

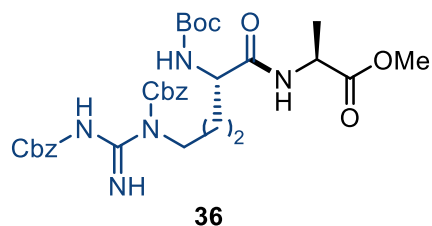

White solid, m.p.: 105 – 108 °C. <sup>1</sup>H NMR (400 MHz, CDCl<sub>3</sub>)  $\delta$  9.63 – 9.07 (m, 2H), 7.52 – 7.16 (m, 10H), 6.94 (s, 1H), 5.61 (d,  $J$  = 8.0 Hz, 1H), 5.33 – 5.21 (m, 2H), 5.21 – 5.05 (m, 2H), 4.45 (p,  $J$  = 8.0 Hz, 1H), 4.29 (d,  $J$  = 8.0 Hz, 1H), 4.07 (dd,  $J$  = 12.0, 8.0 Hz, 1H), 3.97 – 3.81 (m, 1H), 3.65 (s, 3H), 1.86

– 1.57 (m, 4H), 1.43 (s, 9H), 1.19 (d,  $J$  = 8.0 Hz, 3H). <sup>13</sup>C NMR (100 MHz, CDCl<sub>3</sub>)  $\delta$  172.9, 171.7, 163.6, 160.8, 155.8, 155.6, 136.6, 134.6, 128.8, 128.8, 128.4, 128.3, 127.9, 127.8, 79.7, 68.9, 66.9, 53.6, 52.3, 48.0, 44.0, 28.8, 28.3, 24.6, 17.6. HRMS-ESI: calcd for C<sub>31</sub>H<sub>41</sub>N<sub>5</sub>O<sub>9</sub><sup>+</sup> ([M + H]<sup>+</sup>)  $m/z$  628.29770, found 628.29673.

### Boc-Pro-Ala-OMe

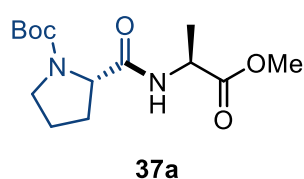

Yellow oil.  $^1\text{H}$  NMR (400 MHz,  $\text{CDCl}_3$ )  $\delta$  4.52 (s, 1H), 4.38 – 4.05 (m, 1H), 3.71 (s, 3H), 3.56 – 3.15 (m, 2H), 2.47 – 1.71 (m, 4H), 1.44 (s, 9H), 1.37 (d,  $J$  = 4.0 Hz, 3H).  $^{13}\text{C}$  NMR (100 MHz,  $\text{CDCl}_3$ )  $\delta$  173.0, 172.1, 155.6, 80.3, 60.8, 59.7, 52.3, 47.9, 47.0, 30.9, 28.2, 24.4, 23.6, 18.1. HRMS-ESI: calcd for  $\text{C}_{14}\text{H}_{25}\text{N}_2\text{O}_5^+$  ( $[\text{M} + \text{H}]^+$ )  $m/z$  301.17580, found 301.17441.

### Cbz-Pro-Ala-OMe

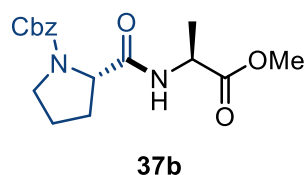

Yellow oil.  $^1\text{H}$  NMR (400 MHz,  $\text{CDCl}_3$ )  $\delta$  7.76 – 7.23 (m, 5H), 7.20 (s, 0.5H), 6.54 (s, 0.5H), 5.16 (s, 2H), 4.68 – 4.43 (m, 1H), 4.41 – 4.21 (m, 1H), 3.92 – 3.63 (m, 3H), 3.62 – 3.25 (m, 2H), 2.44 – 1.73 (m, 4H), 1.44 – 1.06 (m, 3H).  $^{13}\text{C}$  NMR (100 MHz,  $\text{CDCl}_3$ )  $\delta$  173.2, 171.3, 155.9, 136.4, 128.4, 128.0, 127.8, 67.2, 60.3, 52.3, 48.1, 47.5, 46.9, 31.0, 28.4, 24.5, 23.6, 18.0. HRMS-ESI: calcd for  $\text{C}_{17}\text{H}_{23}\text{N}_2\text{O}_5^+$  ( $[\text{M} + \text{H}]^+$ )  $m/z$  335.16015, found 335.15856.

### Fmoc-Pro-Ala-OMe

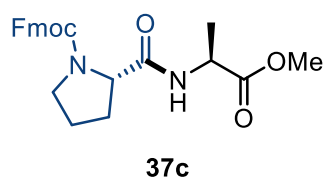

White oil.  $^1\text{H}$  NMR (400 MHz,  $\text{CDCl}_3$ )  $\delta$  7.75 (d,  $J$  = 8.0 Hz, 2H), 7.66 – 7.47 (m, 2H), 7.46 – 7.33 (m, 2H), 7.33 – 7.22 (m, 2H), 7.14 (s, 0.6H), 6.53 (s, 0.4H), 4.68 – 4.48 (m, 1H), 4.47 – 4.04 (m, 4H), 3.85 – 3.28 (m, 5H), 2.44 – 1.73 (m, 4H), 1.54 – 1.17 (m, 3H).  $^{13}\text{C}$  NMR (100 MHz,  $\text{CDCl}_3$ )  $\delta$  173.2, 171.3, 156.0, 143.8, 141.3, 127.7, 127.0, 125.1, 125.0, 120.0, 67.7, 60.8, 60.3, 52.3, 48.2, 47.5, 47.2, 47.0, 31.2, 28.5, 24.6, 23.5, 18.5, 18.1. HRMS-ESI: calcd for  $\text{C}_{24}\text{H}_{27}\text{N}_2\text{O}_5^+$  ( $[\text{M} + \text{H}]^+$ )  $m/z$  423.19145, found 423.19193.

### Cbz-Val-Cys(Bzl)-OMe

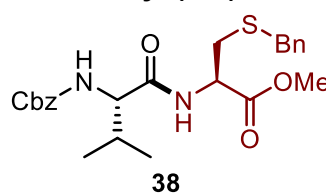

White solid, m.p.: 174 – 177 °C.  $^1\text{H}$  NMR (400 MHz,  $\text{CDCl}_3$ )  $\delta$  7.74 – 6.92 (m, 10H), 6.56 (d,  $J$  = 4.0 Hz, 1H), 5.39 (d,  $J$  = 8.0 Hz, 1H), 5.23 – 4.99 (m, 2H), 4.89 – 4.66 (m, 1H), 4.19 – 3.92 (m, 1H), 3.89 – 3.41 (m, 5H), 2.87 (d,  $J$  = 4.0 Hz, 2H), 2.24 – 2.07 (m, 1H), 1.10 – 0.71 (m, 6H).  $^{13}\text{C}$  NMR (100 MHz,  $\text{CDCl}_3$ )  $\delta$  171.1, 170.9, 156.3, 137.6, 136.2, 128.9, 128.6, 128.5, 128.2, 128.0, 127.3, 67.1, 60.1, 52.6, 51.6, 36.6, 33.1, 31.2, 19.1, 17.6. HRMS-ESI: calcd for  $\text{C}_{24}\text{H}_{31}\text{N}_2\text{O}_5\text{S}^+$  ( $[\text{M} + \text{H}]^+$ )  $m/z$  459.19482, found 459.19269.

### Cbz-Val-Met-OMe

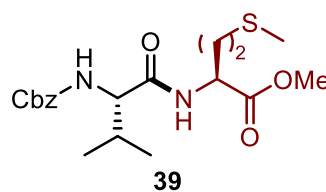

Light yellow solid, m.p.: 122 – 124 °C.  $^1\text{H}$  NMR (400 MHz,  $\text{CDCl}_3$ )  $\delta$  7.47 – 7.18 (m, 6H), 5.83 (d,  $J$  = 12.0 Hz, 1H), 5.24 – 4.98 (m, 2H), 4.73 (dd,  $J$  = 12.0, 8.0 Hz, 1H), 4.24 – 4.07 (m, 1H), 3.72 (s, 3H), 2.59 – 2.37 (m, 2H), 2.22 – 2.07 (m, 2H), 2.07 – 2.01 (m, 3H), 2.01 – 1.87 (m, 1H), 1.06 – 0.84 (m, 6H).  $^{13}\text{C}$  NMR (100 MHz,  $\text{CDCl}_3$ )  $\delta$  172.2, 171.7, 156.5, 136.2, 128.5, 128.1,

127.9, 67.0, 60.3, 52.4, 51.5, 31.3, 29.9, 19.1, 18.0, 15.3. HRMS-ESI: calcd for  $C_{19}H_{29}N_2O_5S^+$  ( $[M + H]^+$ )  $m/z$  397.17917, found 397.17749.

### Cbz-Cys(Bzl)-Ala-OMe

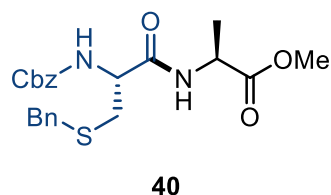

White solid, m.p.: 138 – 140 °C.  $^1H$  NMR (400 MHz,  $CDCl_3$ )  $\delta$  7.52 – 7.13 (m, 10H), 6.89 (s, 1H), 5.69 (d,  $J$  = 8.0 Hz, 1H), 5.12 (s, 2H), 4.54 (p,  $J$  = 8.0 Hz, 1H), 4.44 – 4.18 (m, 1H), 3.86 – 3.50 (m, 5H), 2.87 (dd,  $J$  = 12.0, 4.9 Hz, 1H), 2.75 (dd,  $J$  = 16.0, 4.0 Hz, 1H), 1.38 (d,  $J$  = 8.0 Hz, 3H).  $^{13}C$  NMR (100 MHz,  $CDCl_3$ )  $\delta$  172.8, 169.9, 155.9, 137.9, 136.1, 129.0, 128.6, 128.5, 128.2, 128.1, 127.2, 67.2, 54.1, 52.5, 48.3, 36.6, 33.9, 18.2. HRMS-ESI: calcd for  $C_{22}H_{27}N_2O_5S^+$  ( $[M + H]^+$ )  $m/z$  431.16352, found 431.16162.

### Cbz-Met-Ala-OMe

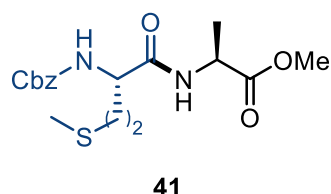

Light yellow oil.  $^1H$  NMR (400 MHz,  $CDCl_3$ )  $\delta$  7.47 – 7.20 (m, 5H), 7.11 (d,  $J$  = 4.0 Hz, 1H), 5.95 (d,  $J$  = 12.0 Hz, 1H), 5.22 – 4.98 (m, 2H), 4.62 – 4.50 (m, 1H), 4.51 – 4.36 (m, 1H), 3.72 (s, 3H), 2.69 – 2.45 (m, 2H), 2.21 – 2.00 (m, 4H), 1.99 – 1.84 (m, 1H), 1.36 (d,  $J$  = 8.0 Hz, 3H).  $^{13}C$  NMR (100 MHz,  $CDCl_3$ )  $\delta$  173.0, 171.1, 156.1, 136.2, 128.5, 128.1, 128.0, 66.9, 53.6, 52.4, 48.0, 32.0, 29.8, 17.8, 15.1. HRMS-ESI: calcd for  $C_{17}H_{25}N_2O_5S^+$  ( $[M + H]^+$ )  $m/z$  369.14787, found 369.14649.

### Cbz-Aib-Ala-OMe

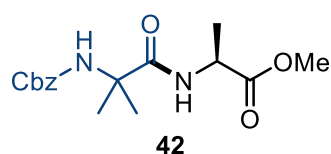

Light yellow solid, m.p.: 67 – 70 °C.  $^1H$  NMR (400 MHz,  $CDCl_3$ )  $\delta$  7.54 – 7.08 (m, 5H), 6.90 (d,  $J$  = 4.0 Hz, 1H), 5.64 (s, 1H), 5.08 (s, 2H), 4.74 – 4.29 (m, 1H), 3.70 (s, 3H), 1.84 – 1.43 (m, 6H), 1.34 (d,  $J$  = 4.0 Hz, 3H).  $^{13}C$  NMR (100 MHz,  $CDCl_3$ )  $\delta$  174.0, 173.4, 155.1, 136.3, 128.5, 128.1, 128.0, 66.6, 56.8, 52.3, 48.2, 25.6, 25.1, 18.0. HRMS-ESI: calcd for  $C_{16}H_{23}N_2O_5^+$  ( $[M + H]^+$ )  $m/z$  323.16015, found 323.15987.

### Cbz-Ac<sub>5</sub>c-Ala-OMe

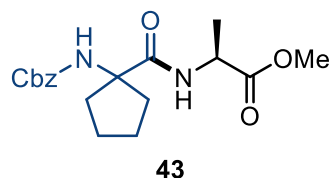

White solid, m.p.: 103 – 104 °C.  $^1H$  NMR (400 MHz,  $CDCl_3$ )  $\delta$  7.59 – 7.19 (m, 5H), 7.07 (s, 1H), 5.35 (s, 1H), 5.10 (s, 2H), 4.53 (s, 1H), 3.70 (s, 3H), 2.43 – 2.15 (m, 2H), 2.06 – 1.85 (m, 2H), 1.82 – 1.57 (m, 4H), 1.49 – 1.09 (m, 3H).  $^{13}C$  NMR (100 MHz,  $CDCl_3$ )  $\delta$  173.6, 173.5, 155.5, 136.3, 128.5, 128.2, 128.1, 67.2, 66.9, 52.3, 48.3, 37.2, 36.6, 24.1, 18.1. HRMS-ESI: calcd for  $C_{18}H_{25}N_2O_5^+$  ( $[M + H]^+$ )  $m/z$  349.17580, found 349.17597.

**Cbz-Phg-Ala-OMe**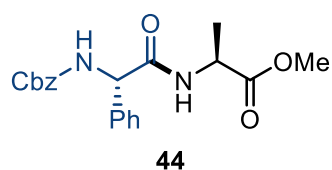

White solid, m.p.: 179 – 181 °C.  $^1\text{H}$  NMR (400 MHz,  $\text{CDCl}_3$ )  $\delta$  7.64 – 6.98 (m, 10H), 6.54 (s, 1H), 6.16 (s, 1H), 5.30 (d,  $J$  = 8.0 Hz, 1H), 5.14 – 5.00 (m, 2H), 4.63 – 4.41 (m, 1H), 3.64 (s, 3H), 1.37 (d,  $J$  = 8.0 Hz, 3H).  $^{13}\text{C}$  NMR (100 MHz,  $\text{CDCl}_3$ )  $\delta$  172.8, 169.4, 155.7, 137.6, 136.2, 129.0, 128.5, 128.5, 128.1, 128.0, 127.3, 67.0, 58.6, 52.4, 48.4, 18.1. HRMS-ESI: calcd for  $\text{C}_{20}\text{H}_{23}\text{N}_2\text{O}_5^+$  ( $[\text{M} + \text{H}]^+$ )  $m/z$  371.16015, found 371.15925.

**Fmoc-Orn(Cbz)-Ala-OMe**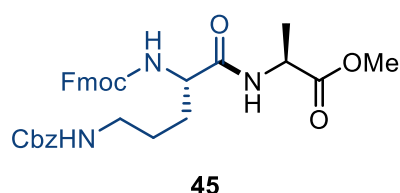

White solid, m.p.: 148 – 150 °C.  $^1\text{H}$  NMR (400 MHz,  $\text{CDCl}_3$ )  $\delta$  7.71 (d,  $J$  = 8.0 Hz, 2H), 7.63 – 7.46 (m, 2H), 7.44 – 7.13 (m, 9H), 5.91 (d,  $J$  = 8.0 Hz, 1H), 5.55 – 5.18 (m, 1H), 5.17 – 4.86 (m, 2H), 4.70 – 4.02 (m, 5H), 3.65 (s, 3H), 3.42 – 2.90 (m, 2H), 1.95 – 1.45 (m, 4H), 1.34 (d,  $J$  = 8.0 Hz, 3H).  $^{13}\text{C}$  NMR (100 MHz,  $\text{CDCl}_3$ )  $\delta$  173.2, 171.9, 157.1, 156.4, 143.9, 143.7, 141.3, 136.5, 128.5, 128.1, 128.0, 127.7, 127.1, 125.1, 120.0, 67.1, 66.7, 53.4, 52.3, 48.0, 47.1, 39.7, 30.3, 25.9, 17.7. HRMS-ESI: calcd for  $\text{C}_{32}\text{H}_{36}\text{N}_3\text{O}_7^+$  ( $[\text{M} + \text{H}]^+$ )  $m/z$  574.25478, found 574.25383.

**Cbz- $\beta$ -Ala-His(Trt)-OMe**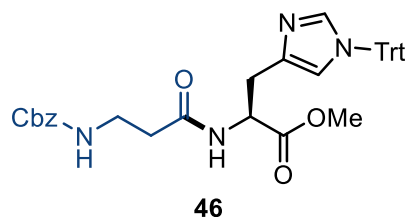

Light yellow oil.  $^1\text{H}$  NMR (400 MHz,  $\text{CDCl}_3$ )  $\delta$  7.55 – 7.17 (m, 16H), 7.16 – 6.97 (m, 6H), 6.73 – 6.38 (m, 2H), 5.01 (s, 2H), 4.87 – 4.70 (m, 1H), 3.74 – 3.28 (m, 5H), 3.16 – 2.93 (m, 2H), 2.56 – 2.29 (m, 2H).  $^{13}\text{C}$  NMR (100 MHz,  $\text{CDCl}_3$ )  $\delta$  171.6, 171.4, 156.5, 142.2, 138.9, 136.9, 136.3, 129.7, 128.4, 128.1, 127.8, 127.7, 119.6, 75.3, 66.2, 52.8, 52.1, 37.6, 36.6, 29.4. HRMS-ESI: calcd for  $\text{C}_{37}\text{H}_{37}\text{N}_4\text{O}_5^+$  ( $[\text{M} + \text{H}]^+$ )  $m/z$  617.27585, found 617.27503.

## 4. Gram-scale Synthesis in Continuous-flow

### 4.1 Flow reactor setup.

The outline diagram of the assembled flow photoreactor was shown in Figure S5. The flow photoreactor was mainly consisted of a peristaltic pump (RBT100-15L), an RLH-18 octet photocatalytic parallel reaction system with eight 10W blue LEDs, and a cylindrical coil continuous-flow reaction system (RLR-18CF, Figure S6), which were purchased from Beijing Roger tech Ltd. FEP tubing (1 mm inner diameter) was selected, and the calculated residence volume of the tubing was about 12 mL. The continuous-flow reaction system was placed on a magnetic hotplate stirrer (DLAB MS-H-Pro<sup>A</sup>) to keep the reaction temperature at 60 °C.

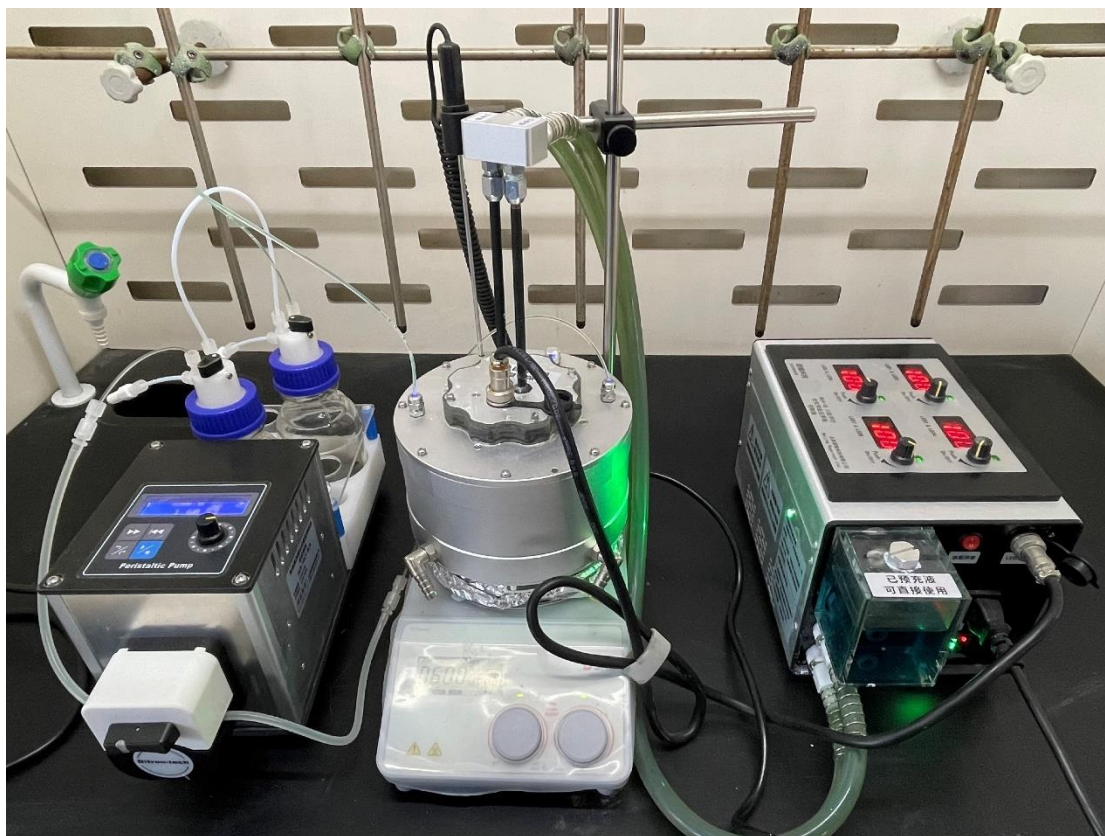

**Figure S5.** Picture of the Flow Photoreactor

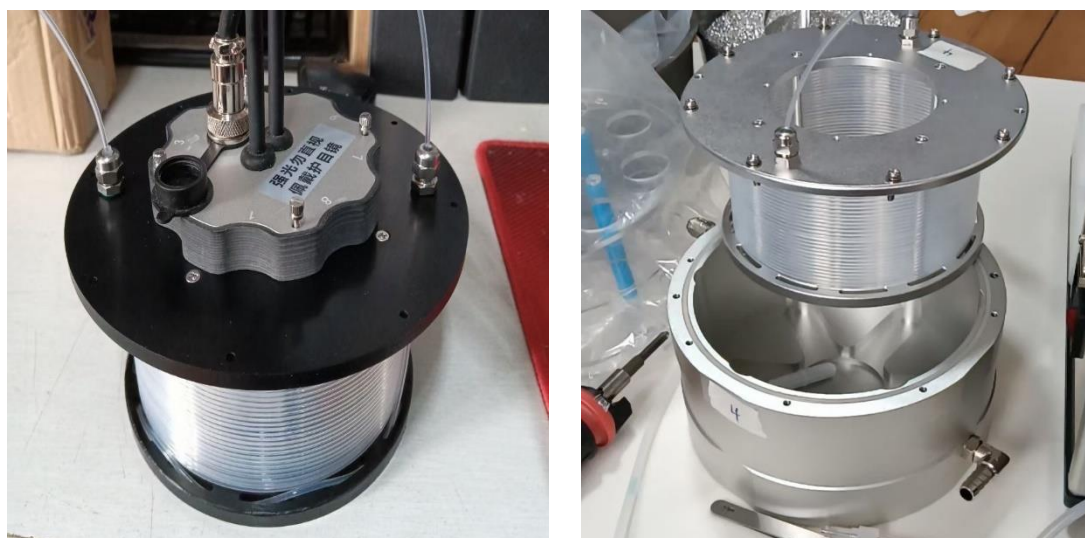

**Figure S6.** Pictures of the cylindrical coil

## 4.2 General procedure

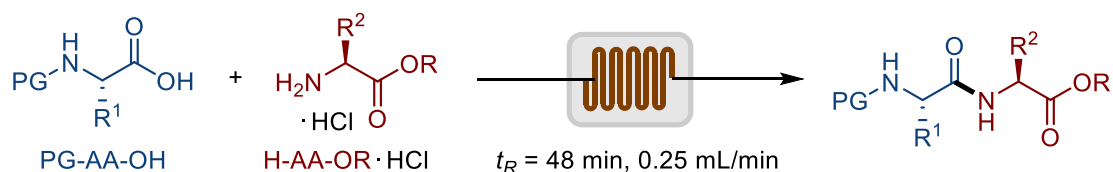

A 200 mL reaction bottle equipped with a PTFE valve was charged with protected amino acid (4.0 mmol, 1.0 equiv.), amino acid ester hydrochloride (4.8 mmol, 1.2 equiv.),  $\text{PPh}_3$  (1.2 mmol, 30 mol%),  $\text{InBr}_3$  (2 mol%),  $[\text{Ir}(\text{dF}(\text{CF}_3)\text{ppy})_2(\text{dtbbpy})]\text{PF}_6$  (1 mol%) and  $\text{Co}(\text{dmgH})(\text{dmgH}_2)\text{Cl}_2$  (5 mol%). The bottle was evacuated and purged with nitrogen three times. The valve was closed after MeCN (32 mL), DMF (8 mL), TMSD (12.0 mmol, 3.0 equiv.) and 2,4,6-collidine (6.0 mmol, 1.5 equiv.) were added under nitrogen. The mixture solution was sonicated for 15 min, then pumped *via* peristaltic pump to pass through the flow photoredox system with a flow rate of 0.25 mL/min at 60 °C. The outlet solution was collected, concentrated, and purified through column chromatography to afford the desired dipeptide product.

## 4.3 General procedure for the deprotection of the Cbz-group

The Cbz-group protected peptide in absolute methanol (0.1M) was performed in the presence of Pd/C (w.t. 15%) at room temperature. The reaction was allowed to stir in an atmosphere of hydrogen (balloon, 1 atm) overnight, then the mixture was filtrated over celite, and the organic solvent was evaporated to afford desired product without further purification. And the crude product was used directly for the next step.

#### 4.4 General procedure for the deprotection of the Boc-group

The Boc-group protected peptide was dissolved in a minimal amount of EtOAc at 0 °C. The HCl/EA solution (0.5M) was added to the flask slowly and the reaction was stirred at 0 °C. Upon complete consumption of the starting material, the reaction mixture was concentrated, and the crude was diluted with H<sub>2</sub>O. The aqueous layer was then adjusted to pH  $\approx$  8 with saturated NaHCO<sub>3</sub> solution and extracted with EtOAc. The organic solvent was dried over sodium sulfate and concentrated to afford the desired product without further purification. And the crude product was used directly for the next step.

#### 4.5 General procedure for hydrolysis of methyl esters

To a solution of the peptide methyl ester in THF (0.25M) was added 0.25N NaOH (1.05 equiv.). Upon complete consumption of the starting material, the reaction mixture was diluted with H<sub>2</sub>O and the aqueous layer was washed with EtOAc. The aqueous layer was then adjusted to pH  $\approx$  2 with 1N HCl and extracted with EtOAc twice. The combined extracts were dried over sodium sulfate and concentrated to afford the desired product without further purification. And the crude product was used directly for the next step.

#### 4.6 General procedure for multigram synthesis

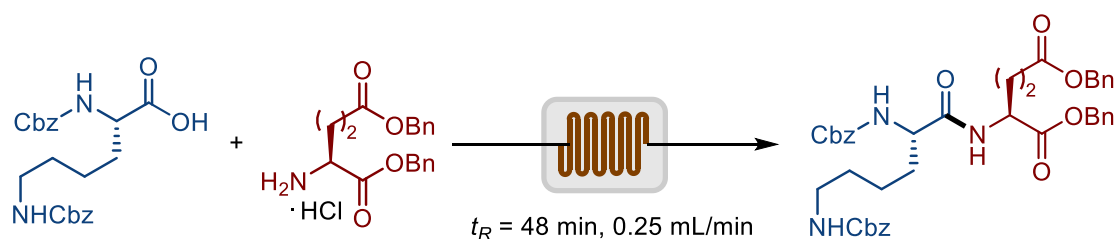

A 200 mL reaction bottle equipped with a PTFE valve was charged with Cbz-L-Lys(Cbz)-OH (10.0 mmol, 1.0 equiv.), L-Glu(OBzl)-OBzl·HCl (12 mmol, 1.2 equiv.), PPh<sub>3</sub> (3.0 mmol, 30 mol%), InBr<sub>3</sub> (2 mol%), [Ir(dF(CF<sub>3</sub>)ppy)<sub>2</sub>(dtbbpy)]PF<sub>6</sub> (1 mol%) and Co(dmgh)(dmgh<sub>2</sub>)Cl<sub>2</sub> (5 mol%). The bottle was evacuated and purged with nitrogen three times. The valve was closed after MeCN (80 mL), DMF (20 mL), TMSD (30.0 mmol, 3.0 equiv.) and 2,4,6-collidine (15 mmol, 1.5 equiv.) were added under nitrogen. The mixture solution was sonicated for 15 min, then pumped *via* peristaltic pump to pass through the flow photoredox system with a flow rate of 0.25 mL/min at 60 °C. The outlet solution was collected and concentrated. The crude solid was dissolved in a minimal amount of CH<sub>2</sub>Cl<sub>2</sub>, followed by precipitation with petroleum ether, then filtered and washed with petroleum ether to afford crude product. The filtrate was collected

and concentrated, then recrystallized with CH<sub>2</sub>Cl<sub>2</sub> and petroleum ether for another time. The crude product was combined and washed with MeOH and petroleum ether, then dried with vacuum-oven to afford Cbz-Lys(Cbz)-Glu(OBzl)-OBzl as a white solid (5.17 g, 71% yield).

#### 4.7 Characterization data

##### Cbz-Pro-Gly-OMe

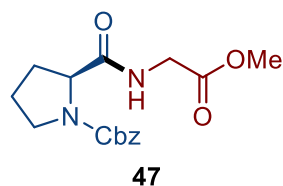

Colorless oil. <sup>1</sup>H NMR (400 MHz, CDCl<sub>3</sub>) δ 7.90 – 6.77 (m, 6H), 5.54 – 4.76 (m, 2H), 4.56 – 4.22 (m, 1H), 4.21 – 3.79 (m, 2H), 3.79 – 2.97 (m, 5H), 2.47 – 1.56 (m, 4H). <sup>13</sup>C NMR (100 MHz, CDCl<sub>3</sub>) δ 172.9, 172.4, 170.1, 155.7, 154.8, 136.4, 128.3, 127.9, 127.6, 67.0, 60.4, 52.0, 47.3, 46.9, 41.0, 31.1, 29.0, 24.3, 23.4. HRMS-ESI: calcd for C<sub>16</sub>H<sub>21</sub>N<sub>2</sub>O<sub>5</sub><sup>+</sup> ([M + H]<sup>+</sup>) *m/z* 321.14450, found 321.14406.

##### Cbz-Leu-Ala-OMe

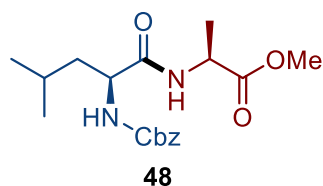

White solid, m.p.: 93 – 95 °C. <sup>1</sup>H NMR (400 MHz, CDCl<sub>3</sub>) δ 7.45 – 7.28 (m, 5H), 6.86 (d, *J* = 8.0 Hz, 1H), 5.51 (d, *J* = 8.0 Hz, 1H), 5.26 – 4.99 (m, 2H), 4.56 (p, *J* = 8.0 Hz, 1H), 4.42 – 4.13 (m, 1H), 3.74 (s, 3H), 1.83 – 1.60 (m, 2H), 1.58 – 1.47 (m, 1H), 1.37 (d, *J* = 8.0 Hz, 3H), 1.07 – 0.75 (m, 6H). <sup>13</sup>C NMR (100 MHz, CDCl<sub>3</sub>) δ 173.2, 172.0, 156.2, 136.2, 128.5, 128.1, 128.0, 66.9, 53.3, 52.4, 48.0, 41.6, 24.6, 22.9, 21.9, 18.0. HRMS-ESI: calcd for C<sub>18</sub>H<sub>27</sub>N<sub>2</sub>O<sub>5</sub><sup>+</sup> ([M + H]<sup>+</sup>) *m/z* 351.19145, found 351.18976.

##### Cbz-Tyr(Bzl)-Gly-OMe

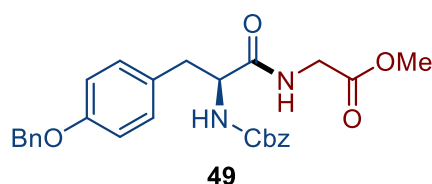

White solid, m.p.: 127 – 129 °C. <sup>1</sup>H NMR (400 MHz, CDCl<sub>3</sub>) δ 7.91 – 7.22 (m, 10H), 7.13 (d, *J* = 8.0 Hz, 2H), 6.90 (d, *J* = 8.0 Hz, 2H), 6.83 – 6.60 (m, 1H), 5.62 (d, *J* = 8.0 Hz, 1H), 5.31 – 4.83 (m, 4H), 4.68 – 4.33 (m, 1H), 4.13 – 3.85 (m, 2H), 3.73 (s, 3H), 3.25 – 2.80 (m, 2H). <sup>13</sup>C NMR (100 MHz, CDCl<sub>3</sub>) δ 171.5, 170.0, 157.8, 156.1, 136.9, 136.1, 130.4, 128.6, 128.5, 128.2, 128.0, 127.5, 115.0, 69.9, 67.0, 56.1, 52.3, 41.1, 37.6. HRMS-ESI: calcd for C<sub>27</sub>H<sub>29</sub>N<sub>2</sub>O<sub>6</sub><sup>+</sup> ([M + H]<sup>+</sup>) *m/z* 477.20201, found 477.19985.

##### Cbz-Ala-Gly-OMe

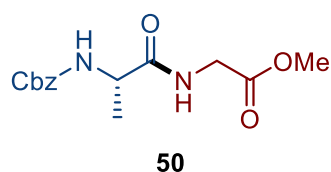

White solid, m.p.: 98 – 101 °C. <sup>1</sup>H NMR (400 MHz, CDCl<sub>3</sub>) δ 7.56 – 7.01 (m, 6H), 6.06 (d, *J* = 8.0 Hz, 1H), 5.28 – 4.87 (m, 2H), 4.53 – 4.16 (m, 1H), 4.08 – 3.81 (m, 2H), 3.67 (s, 3H), 1.36 (d, *J* = 8.0 Hz, 3H). <sup>13</sup>C NMR (100 MHz, CDCl<sub>3</sub>) δ 173.3, 170.3, 156.1, 136.2, 128.5, 128.1, 127.9, 66.8, 52.2, 50.4, 41.0, 18.5. HRMS-ESI: calcd for C<sub>14</sub>H<sub>19</sub>N<sub>2</sub>O<sub>5</sub><sup>+</sup> ([M + H]<sup>+</sup>) *m/z* 295.12885,

found 295.12819.

### Cbz-Gly-Val-OMe

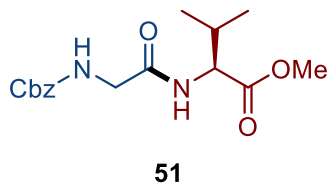

White solid, m.p.: 143 – 146 °C.  $^1\text{H}$  NMR (400 MHz,  $\text{CDCl}_3$ )  $\delta$  7.84 – 7.22 (m, 5H), 7.10 (d,  $J$  = 8.0 Hz, 1H), 6.22 – 5.89 (m, 1H), 5.44 – 4.90 (m, 2H), 4.54 (dd,  $J$  = 8.0, 4.3 Hz, 1H), 3.94 (d,  $J$  = 4.0 Hz, 2H), 3.69 (s, 3H), 2.31 – 1.90 (m, 1H), 1.25 – 0.47 (m, 6H).  $^{13}\text{C}$  NMR (100 MHz,  $\text{CDCl}_3$ )  $\delta$  172.4, 169.4, 156.7, 136.3, 128.5, 128.1, 128.0, 67.0, 57.2, 52.2, 44.3, 31.1, 18.9, 17.7. HRMS-ESI: calcd for  $\text{C}_{16}\text{H}_{23}\text{N}_2\text{O}_5^+$  ( $[\text{M} + \text{H}]^+$ )  $m/z$  323.16015, found 323.15988.

### Cbz-Phe-Leu-OMe

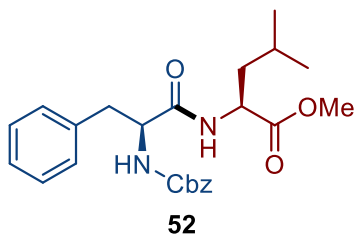

White solid, m.p.: 108 – 112 °C.  $^1\text{H}$  NMR (400 MHz,  $\text{CDCl}_3$ )  $\delta$  7.66 – 6.94 (m, 10H), 6.66 (d,  $J$  = 8.0 Hz, 1H), 5.62 (d,  $J$  = 8.0 Hz, 1H), 5.22 – 4.85 (m, 2H), 4.70 – 4.33 (m, 2H), 3.67 (s, 3H), 3.21 – 2.82 (m, 2H), 1.70 – 1.32 (m, 3H), 1.04 – 0.59 (m, 6H).  $^{13}\text{C}$  NMR (100 MHz,  $\text{CDCl}_3$ )  $\delta$  172.9, 170.9, 156.0, 136.4, 136.2, 129.4, 128.5, 128.5, 128.1, 127.9, 126.9, 67.0, 56.0, 52.2, 50.8, 41.3, 38.5, 24.7, 22.7, 21.9. HRMS-ESI: calcd for  $\text{C}_{24}\text{H}_{31}\text{N}_2\text{O}_5^+$  ( $[\text{M} + \text{H}]^+$ )  $m/z$  427.22275, found 427.22095.

### Cbz-Ile-Tyr( $^t\text{Bu}$ )-OMe

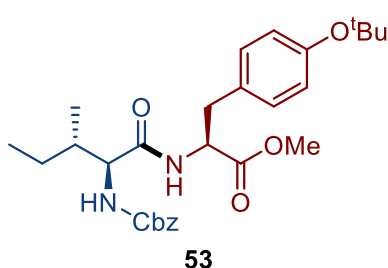

White solid, m.p.: 110 – 111 °C.  $^1\text{H}$  NMR (400 MHz,  $\text{CDCl}_3$ )  $\delta$  7.52 – 7.16 (m, 5H), 7.11 – 6.63 (m, 5H), 5.78 (d,  $J$  = 12.0 Hz, 1H), 5.25 – 4.93 (m, 2H), 4.83 (dd,  $J$  = 12.0, 8.0 Hz, 1H), 4.16 (t,  $J$  = 8.0 Hz, 1H), 3.62 (s, 3H), 3.02 (d,  $J$  = 6.2 Hz, 2H), 1.90 – 1.73 (m, 1H), 1.60 – 1.42 (m, 1H), 1.29 (s, 9H), 1.15 – 1.05 (m, 1H), 0.97 – 0.68 (m, 6H).  $^{13}\text{C}$  NMR (100 MHz,  $\text{CDCl}_3$ )  $\delta$  171.8, 171.2, 156.3, 154.4, 136.4, 130.6, 129.6, 128.4, 128.0, 127.9, 124.1, 66.9, 59.5, 53.4, 52.1, 37.5, 37.3, 28.8, 24.7, 15.2, 11.3. HRMS-ESI: calcd for  $\text{C}_{28}\text{H}_{39}\text{N}_2\text{O}_6^+$  ( $[\text{M} + \text{H}]^+$ )  $m/z$  499.28026, found 499.28068.

### Boc-Cys(Bzl)-Gly-OBzl

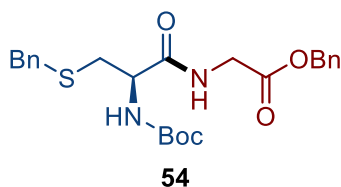

White solid, m.p.: 75 – 77 °C.  $^1\text{H}$  NMR (400 MHz,  $\text{CDCl}_3$ )  $\delta$  7.57 – 6.96 (m, 11H), 5.59 (d,  $J$  = 8.0 Hz, 1H), 5.12 (s, 2H), 4.39 (s, 1H), 4.15 – 3.89 (m, 2H), 3.79 – 3.58 (m, 2H), 2.80 (d,  $J$  = 8.0 Hz, 2H), 1.43 (s, 9H).  $^{13}\text{C}$  NMR (100 MHz,  $\text{CDCl}_3$ )  $\delta$  171.3, 169.5, 155.6, 138.0, 135.2, 129.1, 128.6, 128.6, 128.5, 128.4, 127.2, 80.3, 67.2, 53.6, 41.4, 36.4, 33.8, 28.3. HRMS-ESI: calcd for  $\text{C}_{24}\text{H}_{31}\text{N}_2\text{O}_5\text{S}^+$  ( $[\text{M} + \text{H}]^+$ )  $m/z$  459.19482, found 459.19263.

### Noopept

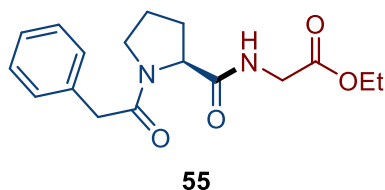

White solid, m.p.: 90 – 93 °C.  $^1\text{H}$  NMR (400 MHz,  $\text{CDCl}_3$ )  $\delta$  7.78 – 7.44 (m, 1H), 7.40 – 7.09 (m, 5H), 4.72 – 4.30 (m, 1H), 4.27 – 4.03 (m, 2H), 4.02 – 3.81 (m, 2H), 3.78 – 3.37 (m, 4H), 2.43 – 1.69 (m, 4H), 1.41 – 1.04 (m, 3H).  $^{13}\text{C}$  NMR (100 MHz,  $\text{CDCl}_3$ )  $\delta$  172.5, 171.7, 171.2, 171.0, 169.6, 169.6, 134.3, 134.2, 129.0, 128.6, 128.5, 126.9, 126.8, 61.3, 61.2, 61.1, 59.7, 47.6, 47.0, 41.8, 41.6, 41.2, 41.0, 32.0, 27.6, 24.8, 22.5, 14.1, 14.0. HRMS-ESI: calcd for  $\text{C}_{17}\text{H}_{23}\text{N}_2\text{O}_4^+$  ( $[\text{M} + \text{H}]^+$ )  $m/z$  319.16523, found 319.16382.

### Methyl (S)-3-(4-(benzyloxy)phenyl)-2-((S)-1-pentanoylpyrrolidine-2-carboxamido)propanoate

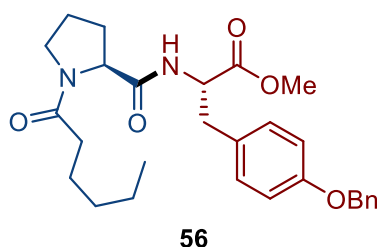

Yellow oil.  $^1\text{H}$  NMR (400 MHz,  $\text{CDCl}_3$ )  $\delta$  7.57 (d,  $J$  = 8.0 Hz, 0.8H), 7.47 – 7.23 (m, 5H), 7.03 (d,  $J$  = 8.0 Hz, 2H), 6.95 – 6.74 (m, 2H), 6.64 (d,  $J$  = 8.0 Hz, 0.2H), 5.14 – 4.91 (m, 2H), 4.91 – 4.65 (m, 1H), 4.63 – 4.17 (m, 1H), 3.90 – 3.54 (m, 3H), 3.51 – 3.21 (m, 2H), 3.17 – 2.80 (m, 2H), 2.40 – 1.49 (m, 8H), 1.43 – 1.13 (m, 4H), 1.03 – 0.66 (m, 3H).  $^{13}\text{C}$  NMR (100 MHz,  $\text{CDCl}_3$ )  $\delta$  173.3, 173.2, 171.9, 171.8, 171.5, 171.0, 157.9, 157.6, 137.0, 136.8, 130.2, 129.9, 128.5, 128.5, 128.1, 127.9, 127.4, 115.0, 114.5, 69.8, 69.8, 61.2, 59.3, 53.3, 52.9, 52.4, 52.2, 47.2, 46.6, 37.0, 36.5, 34.5, 34.3, 31.8, 31.6, 31.5, 27.0, 24.8, 24.4, 24.3, 22.5, 22.2, 14.0, 14.0. HRMS-ESI: calcd for  $\text{C}_{28}\text{H}_{37}\text{N}_2\text{O}_5^+$  ( $[\text{M} + \text{H}]^+$ )  $m/z$  481.26970, found 481.26864.

### Dilept

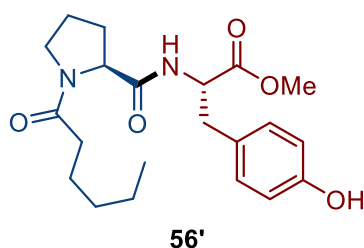

White solid, m.p.: 115 – 117 °C.  $^1\text{H}$  NMR (400 MHz,  $\text{DMSO}-d_6$ )  $\delta$  9.24 (d,  $J$  = 12.0 Hz, 1H), 8.72 – 7.83 (m, 1H), 7.00 (t,  $J$  = 8.0 Hz, 2H), 6.82 – 6.43 (m, 2H), 4.64 – 4.11 (m, 2H), 3.89 – 3.48 (m, 3H), 3.48 – 3.20 (m, 2H), 3.12 – 2.69 (m, 2H), 2.23 (t,  $J$  = 8.0 Hz, 1H), 2.16 – 1.56 (m, 5H), 1.56 – 1.35 (m, 2H), 1.36 – 1.02 (m, 4H), 0.97 – 0.68 (m, 3H).  $^{13}\text{C}$  NMR (100 MHz,  $\text{DMSO}-d_6$ )  $\delta$  172.4, 172.4, 172.3, 171.5, 171.5, 156.5, 156.4, 130.4, 130.3, 127.7, 127.4, 115.4, 115.3, 59.9, 59.2, 54.3, 53.8, 52.3, 52.1, 47.1, 46.7, 36.3, 35.8, 34.0, 33.6, 32.0, 31.4, 31.4, 29.2, 24.5, 24.3, 22.5, 14.3. HRMS-ESI: calcd for  $\text{C}_{21}\text{H}_{31}\text{N}_2\text{O}_5^+$  ( $[\text{M} + \text{H}]^+$ )  $m/z$  391.22275, found 391.22096.

### Cbz-Lys(Cbz)-Glu(OBzl)-OBzl

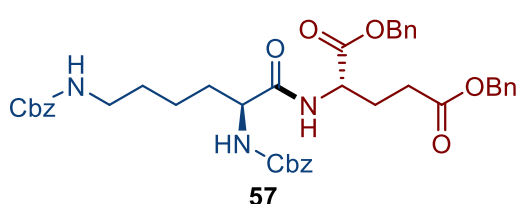

White solid, m.p.: 124 – 127 °C.  $^1\text{H}$  NMR (400 MHz,  $\text{CDCl}_3$ )  $\delta$  7.40 (d,  $J$  = 8.0 Hz, 1H), 7.39 – 6.93 (m, 20H), 6.00 (d,  $J$  = 8.0 Hz, 1H), 5.59 – 5.29 (m, 1H), 5.22 – 4.87 (m, 8H), 4.69 – 4.53 (m, 1H), 4.41 – 4.10 (m,

1H), 3.07 (s, 2H), 2.45 – 2.24 (m, 2H), 2.21 – 2.07 (m, 1H), 2.03 – 1.87 (m, 1H), 1.82 – 1.67 (m, 1H), 1.67 – 1.51 (m, 1H), 1.48 – 1.18 (m, 4H). <sup>13</sup>C NMR (100 MHz, CDCl<sub>3</sub>) δ 172.6, 172.3, 171.6, 156.7, 156.4, 136.7, 136.3, 135.7, 135.2, 128.6, 128.6, 128.5, 128.5, 128.3, 128.3, 128.1, 128.0, 67.3, 66.9, 66.5, 54.6, 51.8, 40.3, 32.2, 30.2, 29.2, 26.8, 22.2. HRMS-ESI: calcd for C<sub>41</sub>H<sub>46</sub>N<sub>3</sub>O<sub>9</sub><sup>+</sup> ([M + H]<sup>+</sup>) *m/z* 724.32286, found 724.32260.

## Vilon

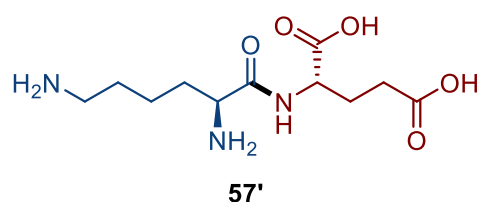

White solid, m.p.: 194 – 196 °C. <sup>1</sup>H NMR (400 MHz, D<sub>2</sub>O) δ 4.24 – 3.79 (m, 2H), 3.10 – 2.79 (m, 2H), 2.35 – 2.09 (m, 2H), 2.09 – 1.73 (m, 4H), 1.73 – 1.56 (m, 2H), 1.54 – 1.18 (m, 2H). <sup>13</sup>C NMR (100 MHz, D<sub>2</sub>O) δ 182.0, 178.1, 169.4, 55.4, 52.9, 38.9, 33.9, 30.3, 28.0, 26.2, 20.9.

HRMS-ESI: calcd for C<sub>11</sub>H<sub>22</sub>N<sub>3</sub>O<sub>5</sub><sup>+</sup> ([M + H]<sup>+</sup>) *m/z* 276.15540, found 276.15411.

## 5. Peptide fragment condensation

### 5.1 Synthesis of proglyuprol

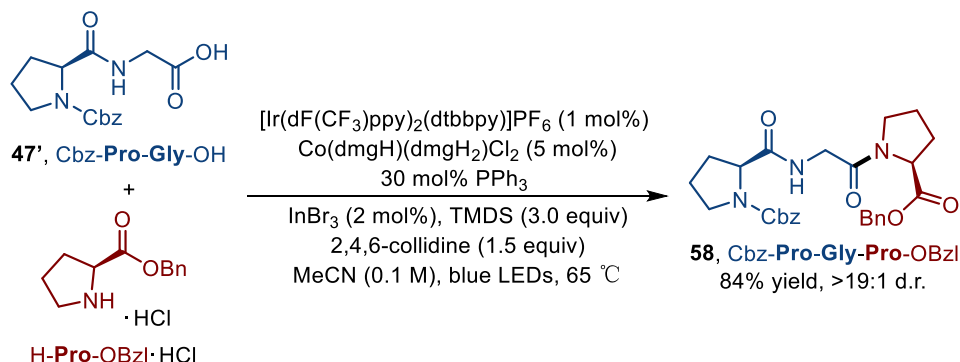

To an oven-dried reaction tube equipped with a stir bar was added Cbz-Pro-Gly-OH (1.0 mmol, 1.0 equiv.), *L*-Pro-OBzl ·HCl (1.5 mmol, 1.5 equiv.), PPh<sub>3</sub> (0.3 mmol, 30 mol%), InBr<sub>3</sub> (2 mol%), [Ir(dF(CF<sub>3</sub>)ppy)<sub>2</sub>(dtbbpy)]PF<sub>6</sub> (1 mol%) and Co(dmgh)(dmgh<sub>2</sub>)Cl<sub>2</sub> (5 mol%). The tube was sealed and placed under nitrogen before MeCN (10 mL), TMSD (3.0 mmol, 3.0 equiv.) and 2,4,6-collidine (1.5 mmol, 1.5 equiv.) were added. Then the system was stirred under the irradiation of blue LED lamps at 65 °C for 16 h. Upon complete consumption of the starting material, the reaction mixture was concentrated and purified through column chromatography to afford Cbz-Pro-Gly-Pro-OBzl **58** as colorless oil (414.6 mg, 84% yield).

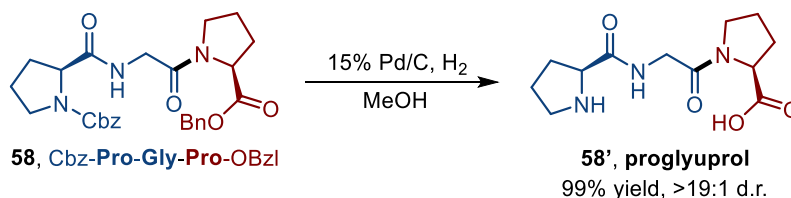

Cbz-Pro-Gly-Pro-OBzl (394.8 mg, 0.8 mmol, 1.0 equiv.) in absolute methanol (8 mL) was performed in the presence of Pd/C (107.7 mg) at room temperature. The reaction was allowed to stir in an atmosphere of hydrogen (balloon, 1 atm) overnight, then the mixture was filtrated over celite, and the organic solvent was evaporated to afford proglyuprol **58'** as a colorless oil (213.3 mg, 99% yield).

## 5.2 Synthesis of LAGV in batch

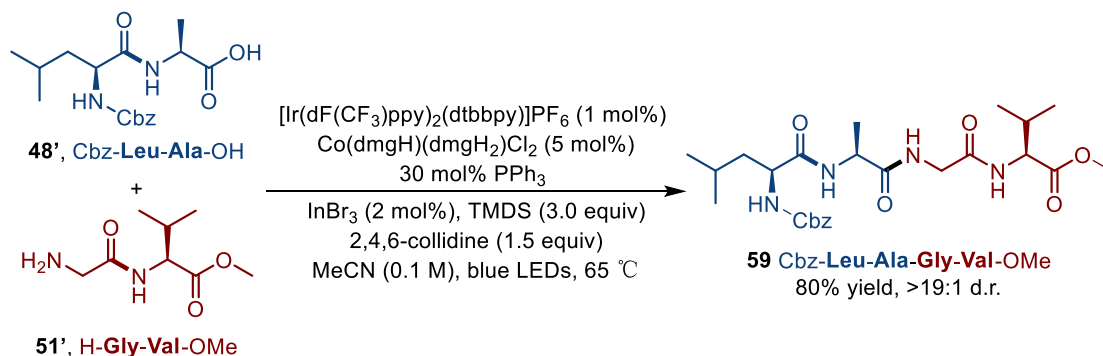

To an oven-dried reaction tube equipped with a stir bar was added Cbz-Leu-Ala-OH (0.8 mmol, 1.0 equiv.), H-Gly-Val-OMe (0.8 mmol, 1.0 equiv.), PPh<sub>3</sub> (0.24 mmol, 30 mol%), InBr<sub>3</sub> (2 mol%), [Ir(dF(CF<sub>3</sub>)ppy)<sub>2</sub>(dtbbpy)]PF<sub>6</sub> (1 mol%) and Co(dmgh)(dmgh<sub>2</sub>)Cl<sub>2</sub> (5 mol%). The tube was sealed and placed under nitrogen before MeCN (8 mL), TMDS (2.4 mmol, 3.0 equiv.) and 2,4,6-collidine (1.2 mmol, 1.5 equiv.) were added. Then the system was stirred under the irradiation of blue LED lamps at 65 °C for 12 h. Upon complete consumption of the starting material, the reaction mixture was concentrated and purified through column chromatography to afford Cbz-Leu-Ala-Gly-Val-OMe **59** as a white solid (324.2 mg, 80% yield).

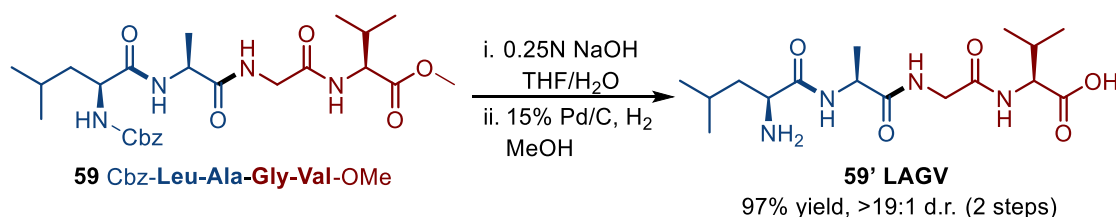

To a solution of Cbz-Leu-Ala-Gly-Val-OMe (324.2 mg, 0.64 mmol, 1.0 equiv.) in THF (2.5 mL) was added 0.25N NaOH (0.67 mmol, 1.05 equiv.). The mixture was stirred for 30 min at room temperature. Upon complete consumption of the starting material, the reaction mixture was diluted with H<sub>2</sub>O and the aqueous layer washed with EtOAc. The aqueous layer was then adjusted to pH ≈ 2 with 1N HCl and extracted with EtOAc twice. The combined extracts were dried over sodium sulfate and concentrated to afford Cbz-Leu-Ala-Gly-Val-OH without further purified (308.9 mg, 98% yield).

Cbz-Leu-Ala-Gly-Val-OH (308.9 mg, 0.63 mmol, 1.0 equiv.) in absolute methanol (6 mL) was performed in the presence of Pd/C (84.2 mg) at room temperature. The reaction was allowed to stir in an atmosphere of hydrogen (balloon, 1 atm) overnight, then the mixture was filtrated over celite, and washed with water. The aqueous solution was dried with vacuum-oven to afford LAGV **59'** as a white solid (222.5 mg, 99% yield).

### 5.3 Synthesis of LAGV in continuous-flow

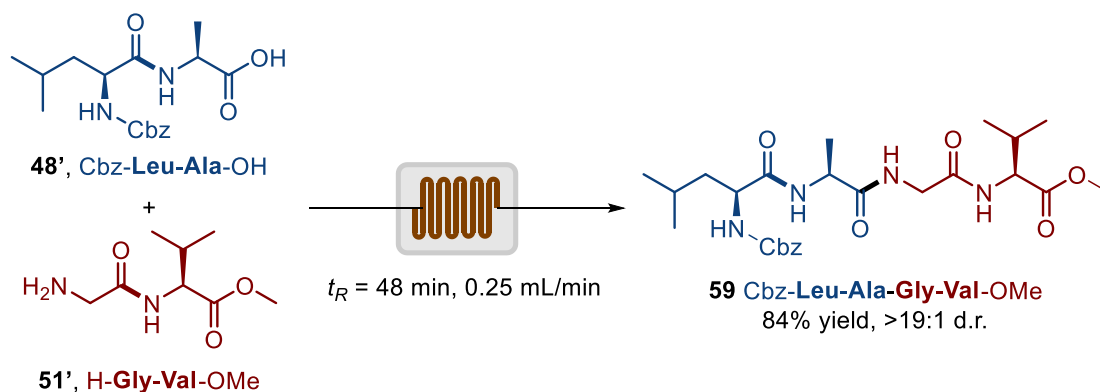

A 200 mL reaction bottle equipped with a PTFE valve was charged with protected amino acid (3.6 mmol, 1.0 equiv.), amino acid ester hydrochloride (3.6 mmol, 1.0 equiv.),  $\text{PPh}_3$  (1.08 mmol, 30 mol%),  $\text{InBr}_3$  (2 mol%),  $[\text{Ir}(\text{dF}(\text{CF}_3)\text{ppy})_2(\text{dtbbpy})]\text{PF}_6$  (1 mol%) and  $\text{Co}(\text{dmgH})(\text{dmgH}_2)\text{Cl}_2$  (5 mol%). The bottle was evacuated and purged with nitrogen three times. The valve was closed after MeCN (28.8 mL), DMF (7.2 mL), TMSD (10.8 mmol, 3.0 equiv.) and 2,4,6-collidine (5.4 mmol, 1.5 equiv.) were added under nitrogen. The mixture was sonicated for 15 min, then pumped *via* a peristaltic pump to pass through the flow photoredox system with a flow rate of 0.25 mL/min at 60 °C. The outlet solution was collected, concentrated and purified through column chromatography to afford Cbz-Leu-Ala-Gly-Val-OMe **59** as a white solid (1.5320 g, 84% yield).

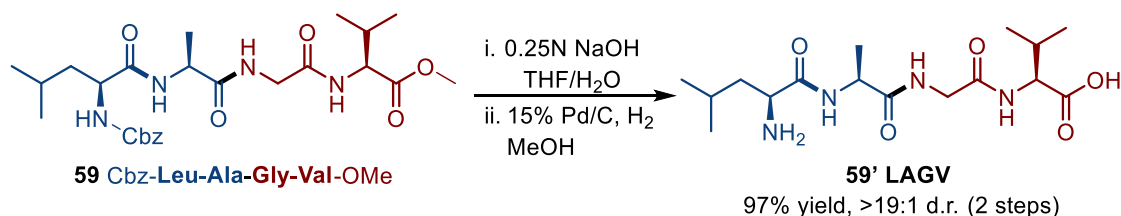

To a solution of Cbz-Leu-Ala-Gly-Val-OMe (1.5320 g, 3.0 mmol, 1.0 equiv.) in THF (12.0 mL) was added 0.25N NaOH (3.15 mmol, 1.05 equiv.). The mixture was stirred for 30 min at room temperature. Upon complete consumption of the starting material, the reaction mixture was diluted with  $\text{H}_2\text{O}$  and the aqueous layer was washed with EtOAc. The aqueous layer was then adjusted to pH  $\approx$  2 with 1N HCl and extracted with EtOAc twice. The combined extracts were dried over sodium sulfate and concentrated to afford Cbz-Leu-Ala-Gly-Val-OH without further purified (1.4482 g, 98% yield).

Cbz-Leu-Ala-Gly-Val-OH (1.4482 g, 2.94 mmol, 1.0 equiv.) in absolute methanol (30 mL) was performed in the presence of Pd/C (395.0 mg) at room temperature. The reaction was allowed to stir in an atmosphere of hydrogen (balloon, 1 atm) overnight, then the mixture was filtrated over celite, and washed with water. The aqueous solution was dried with vacuum-oven to afford LAGV **59'** as a white solid (1.0431 g, 99% yield).

## 5.4 Synthesis of leu-enkephalin

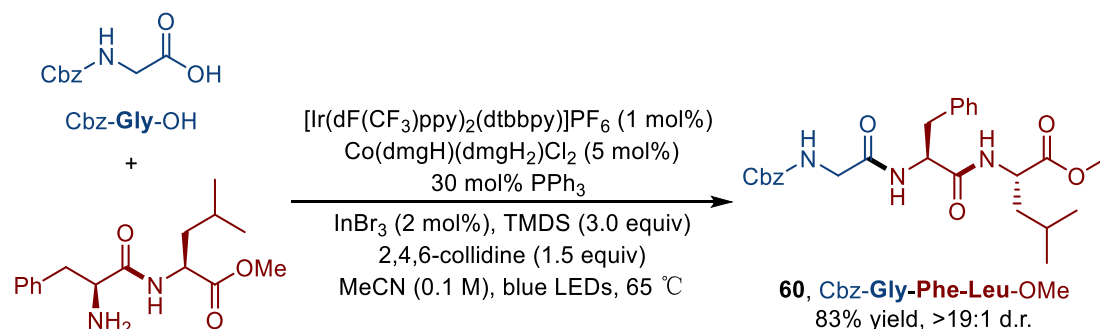

### 52' H-Phe-Leu-OMe

To an oven-dried reaction tube equipped with a stir bar was added Cbz-Gly-OH (1.0 mmol, 1.0 equiv.), H-Phe-Leu-OMe (1.5 mmol, 1.5 equiv.),  $\text{PPh}_3$  (0.3 mmol, 30 mol%),  $\text{InBr}_3$  (2 mol%),  $[\text{Ir}(\text{dF}(\text{CF}_3)\text{ppy})_2(\text{dtbbpy})]\text{PF}_6$  (1 mol%) and  $\text{Co}(\text{dmgh})(\text{dmgh}_2)\text{Cl}_2$  (5 mol%). The tube was sealed and placed under nitrogen before MeCN (10 mL), TMDS (3.0 mmol, 3.0 equiv.) and 2,4,6-collidine (1.5 mmol, 1.5 equiv.) were added. Then the system was stirred under the irradiation of blue LED lamps at 65 °C for 16 h. Upon complete consumption of the starting material, the reaction mixture was concentrated and purified through column chromatography to afford Cbz-Gly-Phe-Leu-OMe **60** as a white solid (406.2 mg, 84% yield).

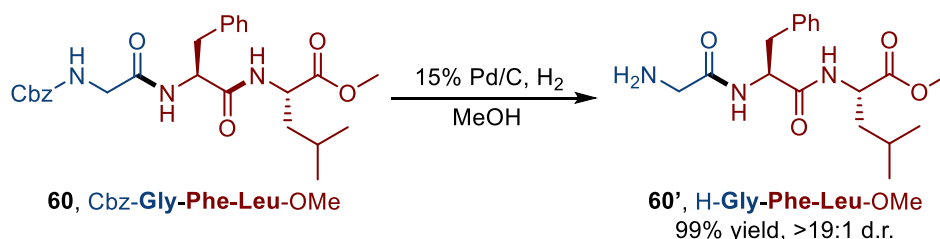

Cbz-Gly-Phe-Leu-OMe (406.2 mg, 0.84 mmol, 1.0 equiv.) in absolute methanol (8.5 mL) was performed in the presence of Pd/C (110.8 mg) at room temperature. The reaction was allowed to stir in an atmosphere of hydrogen (balloon, 1 atm) overnight, then the mixture was filtrated over celite, and the organic solvent was evaporated to afford H-Gly-Phe-Leu-OMe **60'** as a white solid without further purified (290.6 mg, 99% yield).

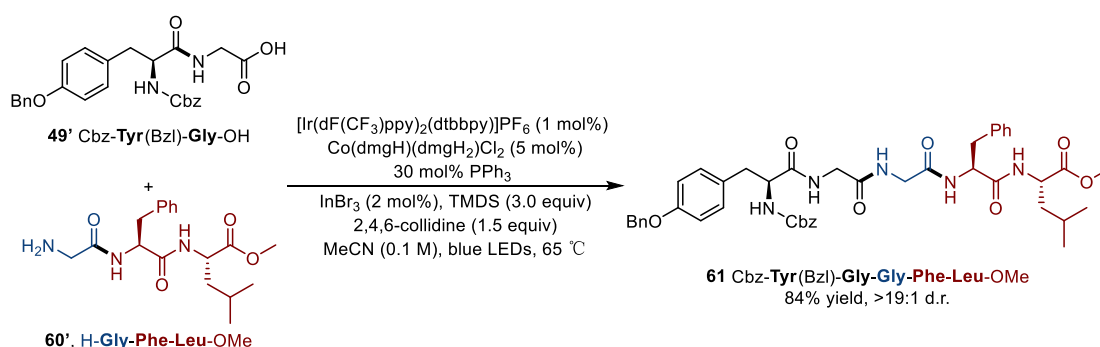

To an oven-dried reaction tube equipped with a stir bar was added Cbz-Tyr(Bzl)-Gly-

OH (0.8 mmol, 1.0 equiv.), H-Gly-Phe-Leu-OMe (0.8 mmol, 1.0 equiv.), PPh<sub>3</sub> (0.24 mmol, 30 mol%), InBr<sub>3</sub> (2 mol%), [Ir(dF(CF<sub>3</sub>)ppy)<sub>2</sub>(dtbbpy)]PF<sub>6</sub> (1 mol%) and Co(dmgH)(dmgH<sub>2</sub>)Cl<sub>2</sub> (5 mol%). The tube was sealed and placed under nitrogen before MeCN (8 mL), TMSD (2.4 mmol, 3.0 equiv.) and 2,4,6-collidine (1.2 mmol, 1.5 equiv.) were added. Then the system was stirred under the irradiation of blue LED lamps at 65 °C for 20 h. Upon complete consumption of the starting material, the reaction mixture was concentrated and purified through column chromatography to afford Cbz-Tyr(Bzl)-Gly-Gly-Phe-Leu-OMe **61** as a white solid (533.5 mg, 84% yield).

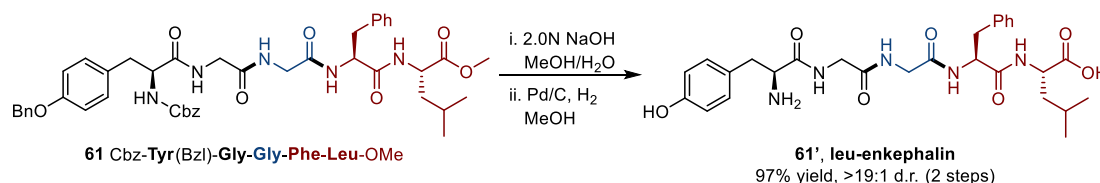

To a solution of Cbz-Tyr(Bzl)-Gly-Gly-Phe-Leu-OMe (476.4 mg, 0.6 mmol, 1.0 equiv.) in methanol (45 mL) was added 2M NaOH (9 mL) at 0 °C for 30 min. Upon complete consumption of the starting material, the reaction mixture was neutralized with 2N HCl to pH ≈ 7.0 and evaporated to remove methanol. The residue was acidified with 2N HCl to pH ≈ 1.0. The precipitates were collected by filtration to afford Cbz-Tyr-Gly-Gly-Phe-Leu-OH as a white solid without further purified (406.3 mg, 98% yield).

Cbz-Tyr-Gly-Gly-Phe-Leu-OH (406.3 mg, 0.59 mmol, 1.0 equiv.) in absolute methanol (6.0 mL) was performed in the presence of Pd/C (110.8 mg) at room temperature. The reaction was allowed to stir in an atmosphere of hydrogen (balloon, 1 atm) overnight, then the mixture was filtrated over celite, and the organic solvent was evaporated to afford leu-enkephalin **61'** as a white solid (324.5 mg, 99% yield).

## 5.5 Synthesis of (tBu)-fanlizhicyclopeptide B

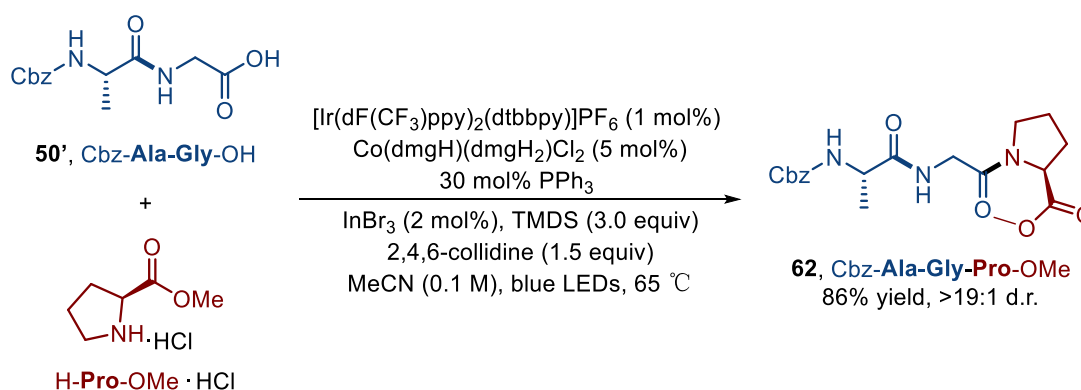

To an oven-dried reaction tube equipped with a stir bar was added Cbz-Ala-Gly-OH (1.0 mmol, 1.0 equiv.), L-Pro-OMe-HCl (1.5 mmol, 1.5 equiv.), PPh<sub>3</sub> (0.3 mmol, 30 mol%), InBr<sub>3</sub> (2 mol%), [Ir(dF(CF<sub>3</sub>)ppy)<sub>2</sub>(dtbbpy)]PF<sub>6</sub> (1 mol%) and Co(dmgH)(dmgH<sub>2</sub>)Cl<sub>2</sub> (5 mol%). The tube was sealed and placed under nitrogen before MeCN (10 mL), TMSD (3.0 mmol, 3.0 equiv.) and 2,4,6-collidine (1.5 mmol, 1.5

equiv.) were added. Then the system was stirred under the irradiation of blue LED lamps at 65 °C for 16 h. Upon complete consumption of the starting material, the reaction mixture was concentrated and purified through column chromatography to afford Cbz-Ala-Gly-Pro-OMe **62** as a white oil (336.6 mg, 86% yield).

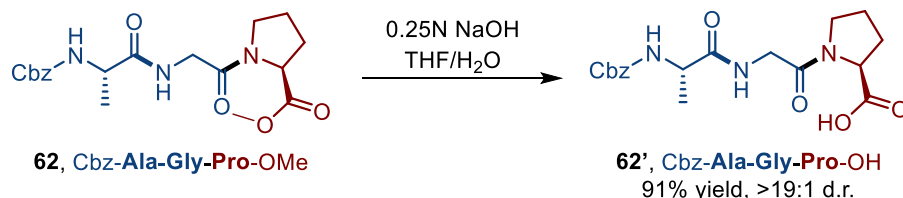

To a solution of Cbz-Ala-Gly-Pro-OMe (336.6 mg, 0.86 mmol, 1.0 equiv.) in THF (3.5 mL) was added 0.25N NaOH (0.90 mmol, 1.05 equiv.). The mixture was stirred for 30 min at room temperature. Upon complete consumption of the starting material, the reaction mixture was diluted with H<sub>2</sub>O and the aqueous layer was washed with EtOAc. The aqueous layer was then adjusted to pH ≈ 2 with 1N HCl and extracted with EtOAc twice. The combined extracts were dried over sodium sulfate and concentrated to afford Cbz-Ala-Gly-Pro-OH **62'** as a white solid without further purified (295.4 mg, 91% yield).

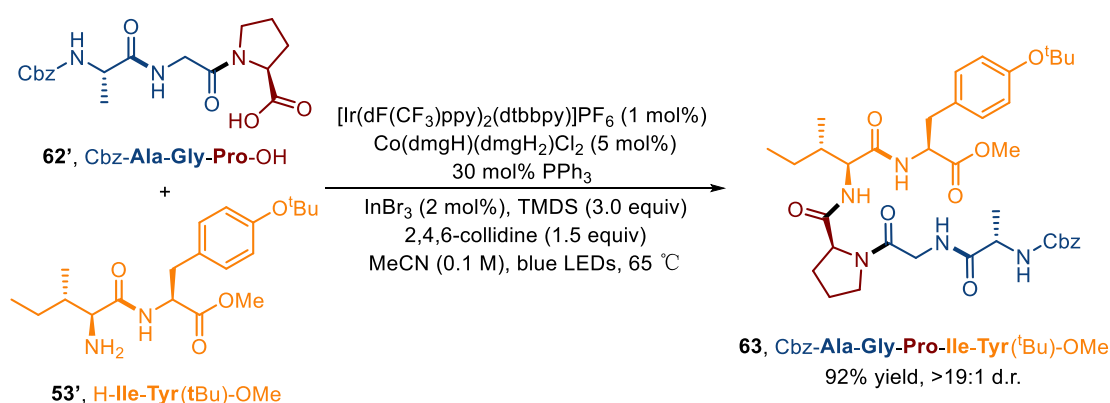

To an oven-dried reaction tube equipped with a stir bar was added Cbz-Ala-Gly-Pro-OH (0.75 mmol, 1.0 equiv.), H-Ile-Tyr(<sup>t</sup>Bu)-OMe (1.125 mmol, 1.5 equiv.), PPh<sub>3</sub> (0.225 mmol, 30 mol%), InBr<sub>3</sub> (2 mol%), [Ir(dF(CF<sub>3</sub>)ppy)<sub>2</sub>(dtbbpy)]PF<sub>6</sub> (1 mol%) and Co(dmgh)(dmgh<sub>2</sub>)Cl<sub>2</sub> (5 mol%). The tube was sealed and placed under nitrogen before MeCN (7.5 mL), TMDS (2.25 mmol, 3.0 equiv.) and 2,4,6-collidine (1.125 mmol, 1.5 equiv.) were added. Then the system was stirred under the irradiation of blue LED lamps at 65 °C for 24 h. Upon complete consumption of the starting material, the reaction mixture was concentrated and purified through column chromatography to afford Cbz-Ala-Gly-Pro-Ile-Tyr(<sup>t</sup>Bu)-OMe **63** as a white solid (499.5 mg, 92% yield).

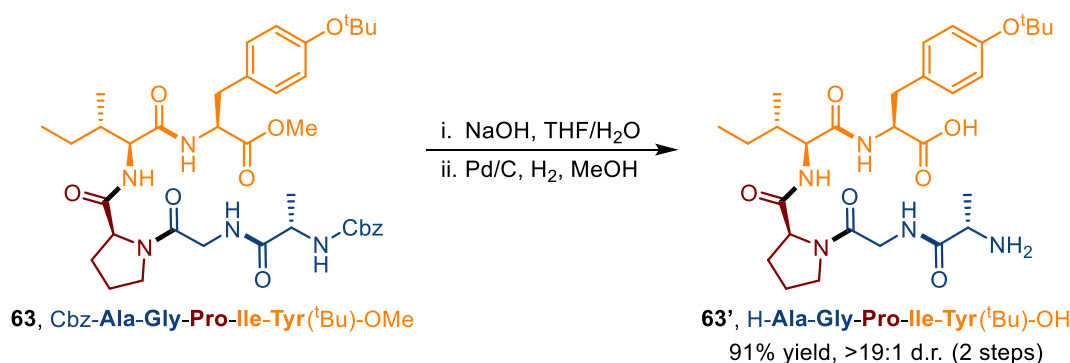

To a solution of Cbz-Ala-Gly-Pro-Ile-Tyr(<sup>t</sup>Bu)-OMe (499.5 mg, 0.69 mmol, 1.0 equiv.) in THF (2.8 mL) was added 0.25N NaOH (0.73 mmol, 1.05 equiv.). The mixture was stirred for 30 min at room temperature. Upon complete consumption of the starting material, the reaction mixture was diluted with H<sub>2</sub>O and the aqueous layer washed with EtOAc. The aqueous layer was then adjusted to pH ≈ 2 with 1N HCl and extracted with EtOAc twice. The combined extracts were dried over sodium sulfate and concentrated to afford Cbz-Ala-Gly-Pro-Ile-Tyr(<sup>t</sup>Bu)-OH as a white solid without further purified (450.6 mg, 92% yield).

Cbz-Ala-Gly-Pro-Ile-Tyr(<sup>t</sup>Bu)-OH (450.6 mg, 0.63 mmol, 1.0 equiv.) in absolute methanol (6.3 mL) was performed in the presence of Pd/C (122.9 mg) at room temperature. The reaction was allowed to stir in an atmosphere of hydrogen (balloon, 1 atm) overnight, then the mixture was filtrated over celite, and the organic solvent was evaporated to afford H-Ala-Gly-Pro-Ile-Tyr(<sup>t</sup>Bu)-OH **63'** as a white solid without further purified (359.1 mg, 99% yield).

**Table S10.** Optimization of cyclic peptide synthesis

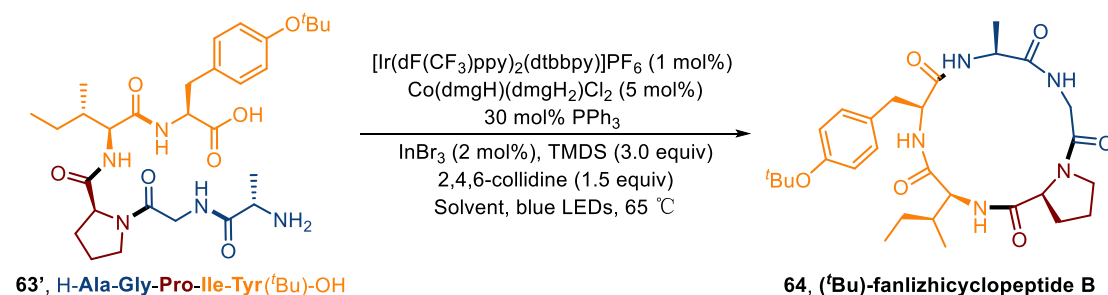

| entry <sup>a</sup> | solvent         | concentration (M) | yield(%) <sup>b</sup> |
|--------------------|-----------------|-------------------|-----------------------|
| 1                  | MeCN            | 0.1               | 15                    |
| 2                  | MeCN            | 0.05              | 15                    |
| 3                  | MeCN            | 0.03              | 19                    |
| 4                  | MeCN/DMF (4:1)  | 0.03              | 39                    |
| 5                  | MeCN/DMA (4:1)  | 0.03              | 33                    |
| 6                  | MeCN/DMSO (4:1) | 0.03              | 13                    |
| 7 <sup>c</sup>     | MeCN/DMF (4:1)  | 0.03              | 25                    |
| 8 <sup>d</sup>     | MeCN/DMF (4:1)  | 0.03              | 36                    |

<sup>a</sup>H-Ala-Gly-Pro-Ile-Tyr(<sup>t</sup>Bu)-OH **63'** (0.2 mmol, 1.0 equiv.). <sup>b</sup>Yields of isolated products. <sup>c</sup>[Ir(dF(CF<sub>3</sub>)ppy)<sub>2</sub>(dtbbpy)]PF<sub>6</sub> (2 mol%) and Co(dmgh)(dmgh<sub>2</sub>)Cl<sub>2</sub> (10 mol%). <sup>d</sup>PPh<sub>3</sub> (50 mol%). <sup>e</sup>HOBt (0.2 mmol, 1.0 equiv.) was added.

To an oven-dried reaction tube equipped with a stir bar was added H-Ala-Gly-Pro-Ile-Tyr(<sup>t</sup>Bu)-OH (0.2 mmol, 1.0 equiv.), PPh<sub>3</sub> (0.06 mmol, 30 mol%), InBr<sub>3</sub> (2 mol%), [Ir(dF(CF<sub>3</sub>)ppy)<sub>2</sub>(dtbbpy)]PF<sub>6</sub> (1 mol%) and Co(dmgh)(dmgh<sub>2</sub>)Cl<sub>2</sub> (5 mol%). The tube was sealed and placed under nitrogen before MeCN (4.8 mL), DMF (1.2 mL), TMSD (0.6 mmol, 3.0 equiv.) and 2,4,6-collidine (0.3 mmol, 1.5 equiv.) were added. Then the system was stirred under the irradiation of blue LED lamps at 65 °C for 24 h. Then the reaction mixture was concentrated and purified through column chromatography to afford (<sup>t</sup>Bu)-fanlizhicyclopeptide B **64** as a white solid (43.1 mg, 39% yield).

## 5.6 Characterization data

### Cbz-Pro-Gly-Pro-OBzl

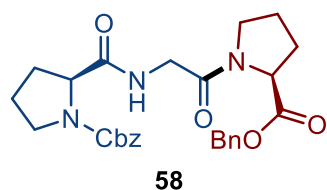

Colorless oil. <sup>1</sup>H NMR (400 MHz, CDCl<sub>3</sub>) δ 7.87 – 6.62 (m, 11H), 5.34 – 4.90 (m, 4H), 4.78 – 4.24 (m, 2H), 4.24 – 3.65 (m, 2H), 3.63 – 3.25 (m, 4H), 2.33 – 1.63 (m, 8H). <sup>13</sup>C NMR (100 MHz, CDCl<sub>3</sub>) δ 172.2, 171.4, 166.6, 155.4, 136.4, 135.4, 128.5, 128.3, 128.2, 128.1, 127.8, 127.6, 66.9, 66.6, 60.6, 58.7, 46.8, 45.7, 41.8, 31.1, 28.7, 24.3, 21.9. HRMS-ESI: calcd for C<sub>27</sub>H<sub>32</sub>N<sub>3</sub>O<sub>6</sub><sup>+</sup> ([M + H]<sup>+</sup>) *m/z* 494.22856, found 494.22822.

### Proglyuprol

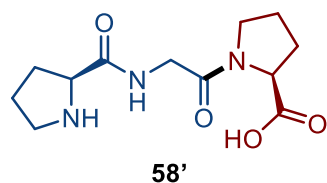

Colorless oil. <sup>1</sup>H NMR (400 MHz, CD<sub>3</sub>OD) δ 4.55 – 4.29 (m, 2H), 4.23 – 3.93 (m, 2H), 3.74 – 3.37 (m, 4H), 2.59 – 1.71 (m, 8H). <sup>13</sup>C NMR (100 MHz, CD<sub>3</sub>OD) δ 176.2, 169.3, 167.4, 60.5, 59.7, 46.2, 41.6, 31.4, 29.9, 24.4, 23.8, 22.2. HRMS-ESI: calcd for C<sub>12</sub>H<sub>20</sub>N<sub>3</sub>O<sub>4</sub><sup>+</sup> ([M + H]<sup>+</sup>) *m/z* 270.14483, found 270.14443.

### Cbz-Leu-Ala-Gly-Val-OMe

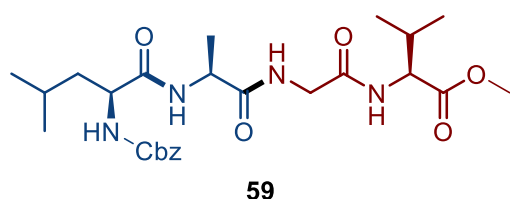

White solid, m.p.: 129 – 131 °C. <sup>1</sup>H NMR (400 MHz, CDCl<sub>3</sub>) δ 7.82 – 7.57 (m, 2H), 7.44 (d, *J* = 8.0 Hz, 1H), 7.38 – 7.24 (m, 5H), 5.96 (d, *J* = 12.0 Hz, 1H), 5.24 – 4.94 (m, 2H), 4.85 – 4.64 (m, 1H), 4.61 – 4.51 (m, 1H), 4.50 – 4.32 (m, 1H), 4.24 – 3.98 (m, 2H), 3.69 (s, 3H), 2.18 – 2.10 (m, 1H), 1.76 – 1.48 (m, 3H), 1.35 (t, *J* = 4.0 Hz, 3H), 1.08 – 0.70 (m, 12H). <sup>13</sup>C NMR (100 MHz, CDCl<sub>3</sub>) δ 172.8, 172.5, 172.3, 168.9, 156.4, 136.3, 128.5, 128.1, 127.9, 66.9, 57.3, 53.5, 52.1, 48.9, 43.1, 42.1, 31.2, 24.6, 22.9, 22.0,

18.9, 17.9. HRMS-ESI: calcd for  $C_{25}H_{39}N_4O_7^+$  ( $[M + H]^+$ )  $m/z$  507.28133, found 507.28172.

### LAGV

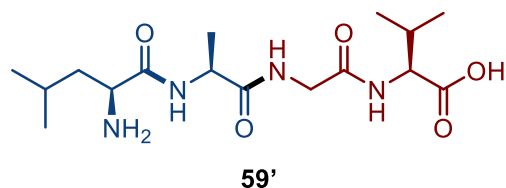

White solid, m.p.: 143 – 145 °C.  $^1H$  NMR (400 MHz,  $CD_3OD$ )  $\delta$  4.34 – 4.18 (m, 2H), 4.12 – 3.99 (m, 1H), 3.96 – 3.83 (m, 1H), 3.80 – 3.69 (m, 1H), 3.34 (s, 1H), 2.26 – 2.12 (m, 1H), 1.83 – 1.59 (m, 3H), 1.51 – 1.34 (m, 3H), 1.16 – 0.97 (m, 6H), 0.97 – 0.84 (m, 6H).  $^{13}C$  NMR (100 MHz,  $CD_3OD$ )  $\delta$  175.8, 173.5, 173.4, 169.7, 59.3, 51.6, 49.7, 42.3, 40.1, 30.8, 24.0, 21.8, 21.0, 18.7, 17.4, 16.2. HRMS-ESI: calcd for  $C_{16}H_{31}N_4O_5^+$  ( $[M + H]^+$ )  $m/z$  359.22890, found 359.22902.

### Cbz-Gly-Phe-Leu-OMe

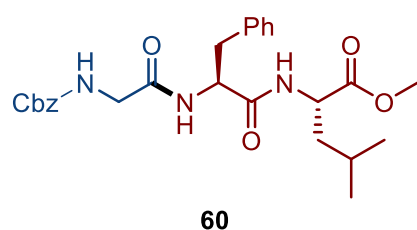

White solid, m.p.: 114 – 117 °C.  $^1H$  NMR (400 MHz,  $CDCl_3$ )  $\delta$  7.51 (d,  $J$  = 8.0 Hz, 1H), 7.43 – 7.26 (m, 5H), 7.25 – 7.00 (m, 6H), 6.06 (s, 1H), 5.07 (s, 2H), 4.95 – 4.78 (m, 1H), 4.63 – 4.44 (m, 1H), 3.86 (d,  $J$  = 4.0 Hz, 2H), 3.63 (s, 3H), 3.18 – 2.82 (m, 2H), 1.69 – 1.35 (m, 3H), 1.03 – 0.62 (m, 6H).  $^{13}C$  NMR (100 MHz,  $CDCl_3$ )  $\delta$  172.9, 171.0, 169.3, 156.7, 136.4, 136.3, 129.4, 128.5, 128.4, 128.1, 128.0, 126.8, 67.0, 54.3, 52.2, 50.9, 44.2, 41.1, 38.6, 24.7, 22.6, 21.9. HRMS-ESI: calcd for  $C_{26}H_{34}N_3O_6^+$  ( $[M + H]^+$ )  $m/z$  484.24421, found 484.24340.

### Cbz-Tyr(Bzl)-Gly-Gly-Phe-Leu-OMe

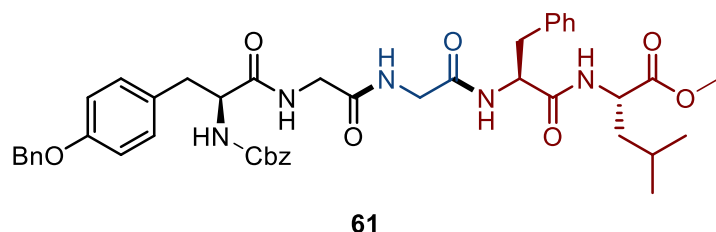

White solid, m.p.: 102 – 105 °C.  $^1H$  NMR (400 MHz,  $CD_3OD$ )  $\delta$  7.57 – 7.32 (m, 5H), 7.31 – 7.15 (m, 10H), 7.12 (d,  $J$  = 8.0 Hz, 2H), 6.87 (d,  $J$  = 8.0 Hz, 2H), 5.10 – 4.93 (m, 4H), 4.71 – 4.65 (m, 1H), 4.49 – 4.40 (m, 1H), 4.38 – 4.23 (m, 1H), 3.97 – 3.71 (m, 4H), 3.97 – 3.71 (m, 3H), 3.23 – 3.02 (m, 2H), 2.00 – 2.72 (m, 2H), 1.75 – 1.48 (m, 3H), 1.02 – 0.72 (m, 6H).  $^{13}C$  NMR (100 MHz,  $CD_3OD$ )  $\delta$  173.5, 172.9, 172.0, 170.7, 169.8, 157.7, 157.1, 137.3, 136.9, 136.7, 130.0, 129.2, 129.0, 128.1, 128.0, 128.0, 127.6, 127.4, 127.3, 127.1, 126.3, 114.5, 69.5, 66.3, 56.9, 54.4, 51.3, 50.8, 42.5, 41.9, 39.9, 37.4, 36.5, 24.4, 21.9, 20.5. HRMS-ESI: calcd for  $C_{44}H_{52}N_5O_9^+$  ( $[M + H]^+$ )  $m/z$  794.37595, found 794.37262.

### Leu-enkephalin

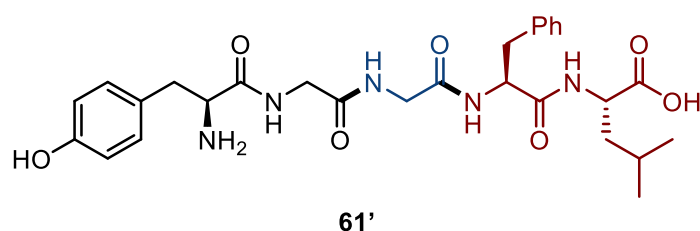

White solid, m.p.: 148 – 151 °C.  $^1\text{H}$  NMR (400 MHz,  $\text{CD}_3\text{OD}$ )  $\delta$  7.39 – 7.11 (m, 5H), 7.10 – 6.95 (m, 2H), 6.77 – 6.58 (m, 2H), 4.70 – 4.60 (m, 1H), 4.56 – 4.46 (m, 1H), 4.46 – 4.31 (m, 1H), 3.88 – 3.63 (m, 4H), 3.20 (dt,  $J$  = 12.0, 4.0 Hz, 1H), 3.04 (dt,  $J$  = 12.0, 4.0 Hz, 1H), 3.00 – 2.83 (m, 2H), 1.79 – 1.55 (m, 3H), 1.06 – 0.73 (m, 6H).  $^{13}\text{C}$  NMR (100 MHz,  $\text{CD}_3\text{OD}$ )  $\delta$  175.0, 174.6, 172.4, 172.1, 170.1, 159.0, 155.9, 137.1, 130.1, 128.9, 128.9, 128.0, 128.0, 127.6, 126.3, 126.3, 114.8, 54.6, 51.0, 43.3, 42.0, 40.3, 37.1, 36.9, 24.5, 22.0, 20.5. HRMS-ESI: calcd for  $\text{C}_{28}\text{H}_{38}\text{N}_5\text{O}_7^+$  ( $[\text{M} + \text{H}]^+$ )  $m/z$  556.27658, found 556.27601.

### Cbz-Ala-Gly-Pro-OMe

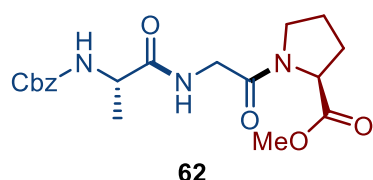

White oil.  $^1\text{H}$  NMR (400 MHz,  $\text{CDCl}_3$ )  $\delta$  7.69 – 6.86 (m, 6H), 6.17 – 5.88 (m, 1H), 5.24 – 4.91 (m, 2H), 4.62 – 4.43 (m, 1H), 4.43 – 4.19 (m, 1H), 4.19 – 3.76 (m, 2H), 3.69 (s, 3H), 3.63 – 3.28 (m, 2H), 2.30 – 1.71 (m, 4H), 1.51 – 1.19 (m, 3H).  $^{13}\text{C}$  NMR (100 MHz,  $\text{CDCl}_3$ )  $\delta$  172.6, 172.2, 166.9, 155.9, 136.4, 128.4, 128.0, 66.7, 58.8, 52.3, 50.5, 45.9, 41.8, 28.9, 24.5, 18.8. HRMS-ESI: calcd for  $\text{C}_{19}\text{H}_{26}\text{N}_3\text{O}_6^+$  ( $[\text{M} + \text{H}]^+$ )  $m/z$  392.18161, found 392.18082.

### Cbz-Ala-Gly-Pro-Ile-Tyr( $^t\text{Bu}$ )-OMe

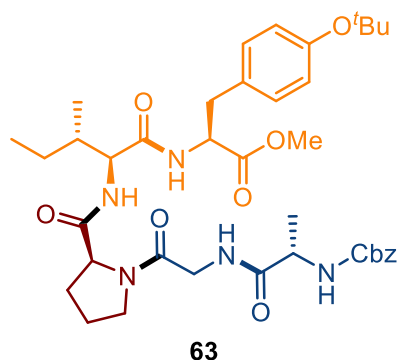

White solid, m.p.: 189 – 191 °C.  $^1\text{H}$  NMR (400 MHz,  $\text{CDCl}_3$ )  $\delta$  7.41 (s, 1H), 7.37 – 7.27 (m, 5H), 7.22 (d,  $J$  = 8.0 Hz, 1H), 7.00 (d,  $J$  = 8.0 Hz, 2H), 6.88 (d,  $J$  = 8.0 Hz, 2H), 6.70 (d,  $J$  = 8.0 Hz, 1H), 5.93 (d,  $J$  = 8.0 Hz, 1H), 5.22 – 4.97 (m, 2H), 4.77 (dd,  $J$  = 12.0, 4.0 Hz, 1H), 4.65 – 4.33 (m, 2H), 4.31 – 3.90 (m, 3H), 3.74 – 3.56 (m, 4H), 3.52 – 3.36 (m, 1H), 3.02 (d,  $J$  = 8.0 Hz, 2H), 2.24 – 1.71 (m, 5H), 1.48 – 1.39 (m, 1H), 1.36 (d,  $J$  = 8.0 Hz, 3H), 1.33 – 1.24 (m, 9H), 1.12 – 1.01 (m, 1H), 0.92 – 0.72 (m, 6H).  $^{13}\text{C}$  NMR (100 MHz,  $\text{CDCl}_3$ )  $\delta$  172.8, 171.8, 171.3, 170.8, 167.8, 156.0, 154.4, 136.3, 130.6, 129.7, 128.5, 128.1, 128.0, 124.2, 78.4, 66.9, 60.2, 57.9, 53.4, 52.1, 50.3, 46.6, 42.1, 37.2, 36.7, 28.8, 28.7, 24.8, 24.7, 19.1, 15.3, 11.2. HRMS-ESI: calcd for  $\text{C}_{38}\text{H}_{54}\text{N}_5\text{O}_9^+$  ( $[\text{M} + \text{H}]^+$ )  $m/z$  724.39160, found 724.39071.

**(<sup>t</sup>Bu)-fanlizhicyclopeptide B**

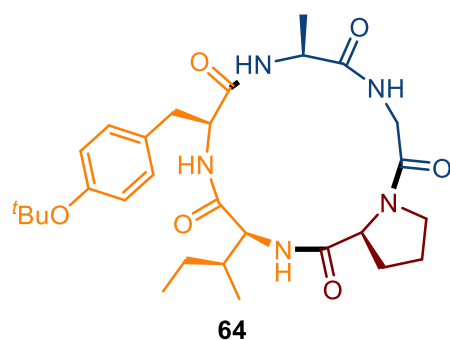

White solid, m.p.: 224 – 226 °C. <sup>1</sup>H NMR (400 MHz, CDCl<sub>3</sub>) δ 8.21 (s, 1H), 7.83 (s, 1H), 7.57 (d, *J* = 4.0 Hz, 1H), 7.24 – 6.99 (m, 3H), 6.86 (d, *J* = 8.0 Hz, 2H), 4.72 (s, 1H), 4.47 – 4.27 (m, 2H), 4.26 – 4.08 (m, 2H), 4.04 – 3.90 (m, 1H), 3.66 – 3.55 (m, 1H), 3.53 – 3.41 (m, 1H), 3.31 – 3.00 (m, 3H), 2.37 – 2.22 (m, 1H), 2.20 – 2.06 (m, 1H), 2.05 – 1.92 (m, 2H), 1.91 – 1.79 (m, 1H), 1.49 – 1.39 (m, 1H), 1.39 – 1.31 (m, 3H), 1.30 (s, 9H),

1.06 – 0.97 (m, 1H), 1.06 – 0.97 (m, 6H). <sup>13</sup>C NMR (100 MHz, CDCl<sub>3</sub>) δ 173.5, 172.3, 172.2, 172.1, 168.5, 154.2, 131.6, 129.9, 124.2, 78.3, 62.6, 58.9, 56.9, 49.7, 47.0, 42.2, 36.6, 35.9, 29.7, 28.9, 25.2, 25.1, 15.9, 15.4, 10.9. HRMS-ESI: calcd for C<sub>29</sub>H<sub>44</sub>N<sub>5</sub>O<sub>6</sub><sup>+</sup> ([M + H]<sup>+</sup>) *m/z* 558.32861, found 558.32790.

## 6. Solid phase peptide synthesis (SPPS) of PAR2

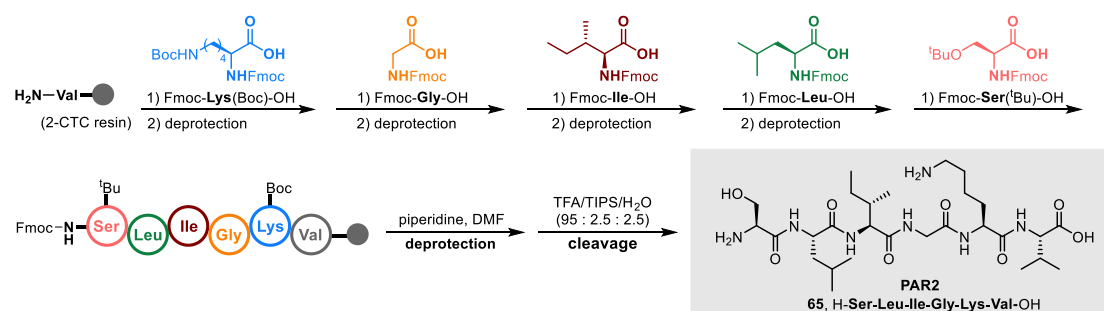

### Incorporating the First Amino Acid on the Solid Support

2-Chlorotriyl Chloride resin (330 mg) with a loading of 0.8-1.5 mmol/g was placed in an oven-dried reaction tube. The resin was swollen in 5 mL CH<sub>2</sub>Cl<sub>2</sub> for 30 min, then filtered, and added to a solution of Fmoc-L-Val-OH (169.7 mg, 0.5 mmol, 1.0 equiv.), *N,N*-diisopropylethylamine (DIPEA, 129.3 mg, 1.0 mmol, 2.0 equiv.) in DMF/CH<sub>2</sub>Cl<sub>2</sub> (1:1, v/v, 5 mL). The loading reaction was stirring for 2 h at room temperature. Then, the resin was filtered and washed with DMF (3 × 5.0 mL) and CH<sub>2</sub>Cl<sub>2</sub> (3 × 5.0 mL).

### Removing Fmoc-Protection

A solution of 20% piperidine in DMF (5 mL) was added to the tube with Fmoc-Val-resin and stirred for 30 min. The reaction progress was monitored by ninhydrin ethanolic solution. Then, the resin was filtered and washed with DMF (3 × 5.0 mL) and CH<sub>2</sub>Cl<sub>2</sub> (3 × 5.0 mL).

### Peptide Elongation

To an oven-dried reaction tube equipped with a stir bar was added Fmoc amino acid (0.5 mmol, 1.0 equiv.), PPh<sub>3</sub> (0.15 mmol, 30 mol%), InBr<sub>3</sub> (2 mol%), [Ir(dF(CF<sub>3</sub>)ppy)<sub>2</sub>(dtbbpy)]PF<sub>6</sub> (1 mol%), Co(dmgh)(dmgh<sub>2</sub>)Cl<sub>2</sub> (5 mol%) and the resin. The tube was sealed and placed under nitrogen before MeCN (5 mL), TMSD (1.5 mmol, 3.0 equiv.) and 2,4,6-collidine (0.75 mmol, 1.5 equiv.) were added. Then the system was stirred under the irradiation of blue LED lamps at 65 °C for 12 h. The reaction progress was monitored by ninhydrin ethanolic solution. Then, the resin was filtered and washed with DMF and CH<sub>2</sub>Cl<sub>2</sub>.

### Resin Cleavage

Cleavage was then performed with 2.0 mL of a freshly prepared TFA/TIS/H<sub>2</sub>O (95:2.5:2.5, v/v/v) solution for 2 h. The resin was then filtered and washed with pure TFA (3 × 1 mL). The collected TFA solution was evaporated, and the residue was washed by petroleum ether (4 × 5.0 mL) to afford crude product as a beige solid. The precipitate then was dissolved in MeOH for HPLC/MS analysis.

### HPLC Analysis

HPLC analysis was performed using Shim-pack GIST C18 5 μm analytical column, 4.6

I.D. × 150 mm, 215 nm UV detection. The mobile phase consisted of DDI water with 0.1% (v/v) HPLC grade formic acid (solvent A), and HPLC grade acetonitrile (solvent B). Isocratic elution with 40% solvent B at a flow rate of 1.0 mL/min over 15 min gave the target peptide,  $t_R = 7.8$  min. HRMS-ESI: calcd for  $C_{28}H_{54}N_7O_8^+$  ( $[M + H]^+$ )  $m/z$  616.40284, found: 616.40217, calcd for ( $[M + 2H]^{2+}$ )  $m/z$  308.70505, found: 308.70486.

mV

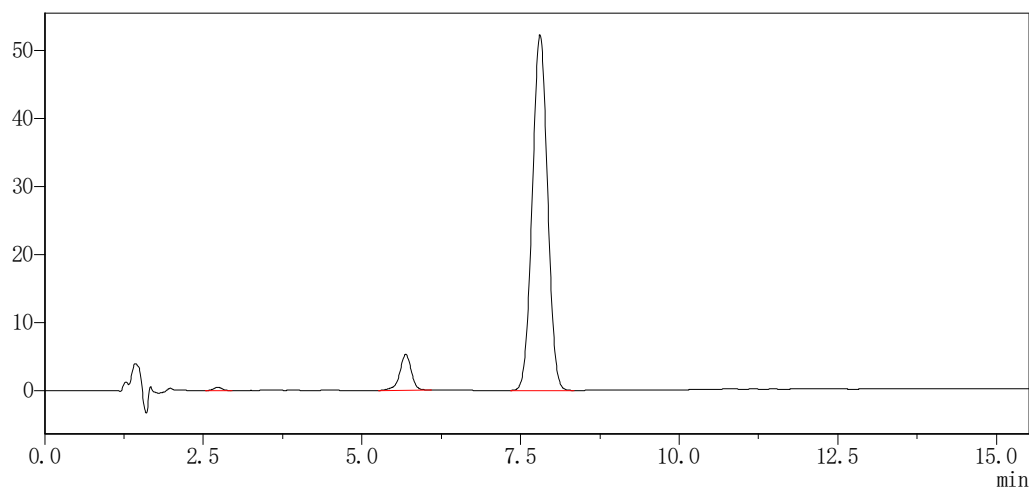

| Peak | RetTime (min) | Area (μV*s) | Height (μV) | Area % |
|------|---------------|-------------|-------------|--------|
| 1    | 2.729         | 4381        | 467         | 0.463  |
| 2    | 5.690         | 66717       | 5289        | 7.056  |
| 3    | 7.806         | 874447      | 52340       | 92.481 |

20220923\_ESI\_MS\_SuJung\_S4 #12 RT: 0.13 AV: 1 SB: 2 0.05-0.07 NL: 3.00E8  
T: FTMS → p ESI Full ms [120.0000-1000.0000]

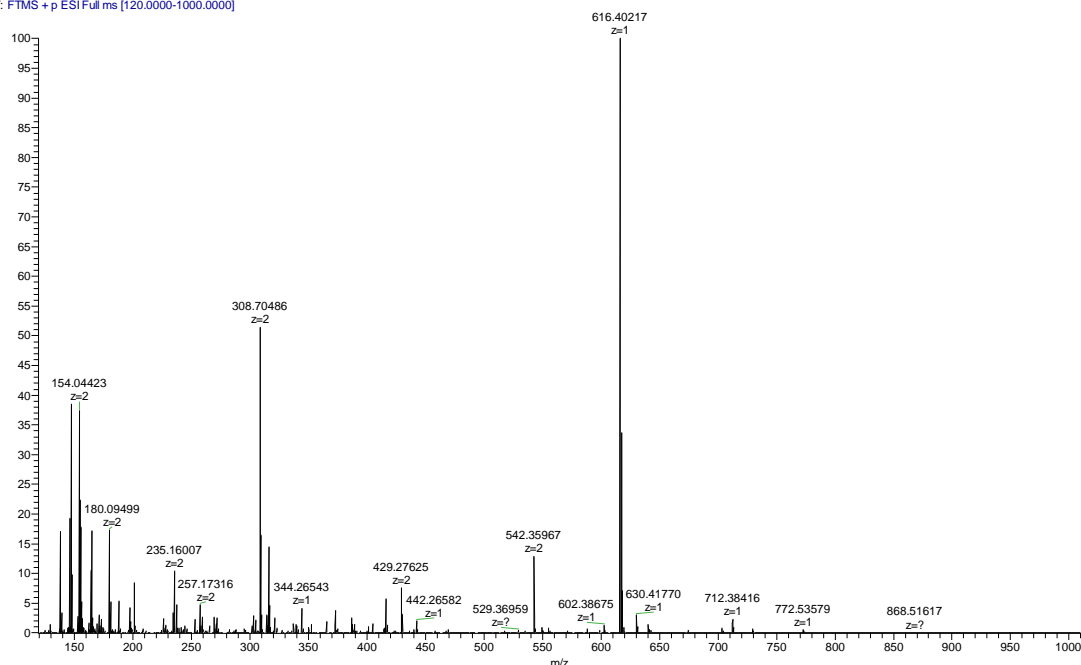

## Further purification

The crude product was dissolved in MeOH and THF, followed by precipitation with petroleum ether, then filtered and washed with petroleum ether to afford desired peptide as an off-white solid. The product was dissolved in MeOH for HPLC/MS

analysis.

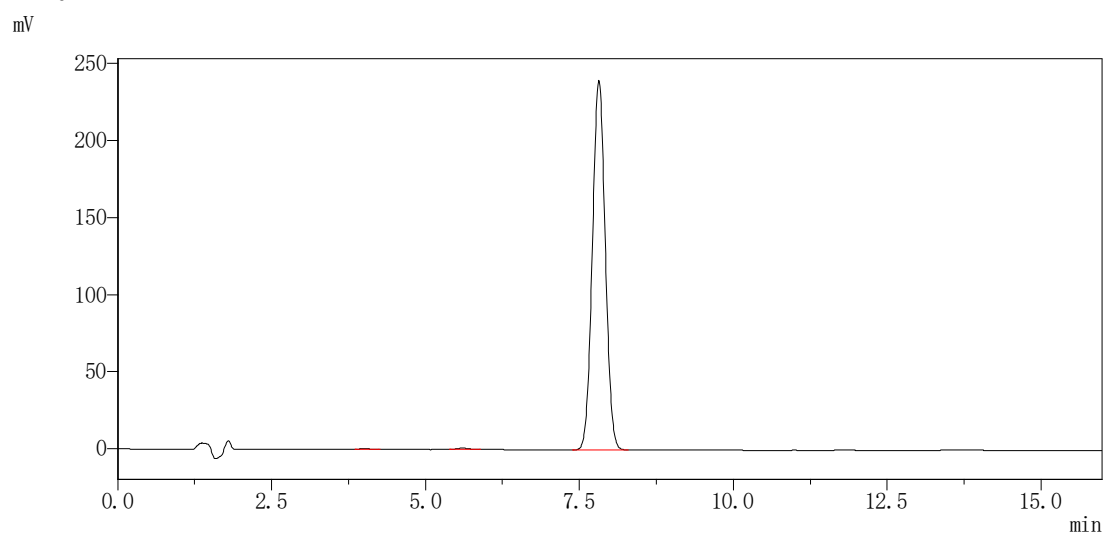

| Peak | RetTime (min) | Area (μV*s) | Height (μV) | Area % |
|------|---------------|-------------|-------------|--------|
| 1    | 4.000         | 5354        | 549         | 0.152  |
| 2    | 5.605         | 11682       | 914         | 0.333  |
| 3    | 7.815         | 3493963     | 239700      | 99.515 |

## 7. Control experiments

### 7.1 Radical quenching experiment

Radical quenching experiment was performed as indicated in the following. Upon addition of TEMPO (1.0 equiv.) into the reaction mixture, the coupling was completely inhibited. This result indicated the radical nature of this transformation.

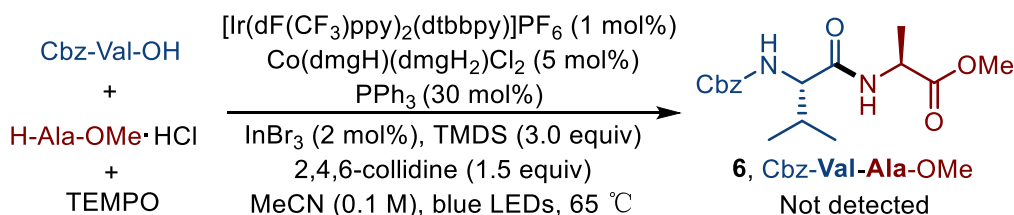

**Procedure:** To an oven-dried reaction tube equipped with a stir bar was added Cbz-*L*-Val-OH (0.2 mmol, 1.0 equiv.), *L*-Ala-OMe·HCl (0.3 mmol, 1.5 equiv.), 2,2,6,6-tetramethylpiperidinoxy (TEMPO, 0.2 mmol, 1.0 equiv.), PPh<sub>3</sub> (0.06 mmol, 30 mol%), InBr<sub>3</sub> (2 mol%), [Ir(dF(CF<sub>3</sub>)ppy)<sub>2</sub>(dtbbpy)]PF<sub>6</sub> (1 mol%) and Co(dmgH)(dmgH<sub>2</sub>)Cl<sub>2</sub> (5 mol%). The tube was sealed and placed under nitrogen before MeCN (2 mL), TMSD (0.6 mmol, 3.0 equiv.) and 2,4,6-collidine (0.3 mmol, 1.5 equiv.) were added. Then the system was stirred under the irradiation of blue LED lamps at 65 °C for 12 h. No desired dipeptide product was detected.

### 7.2 Light ON/OFF experiments

To examine the impact of light, we conducted experiments under alternating periods of irradiation and darkness. This resulted in an interruption of the reaction progress in the absence of light and recuperation of reactivity on further illumination, which allowed precise temporal control over the entire reaction period. These results demonstrated that light is a necessary component of the reaction.

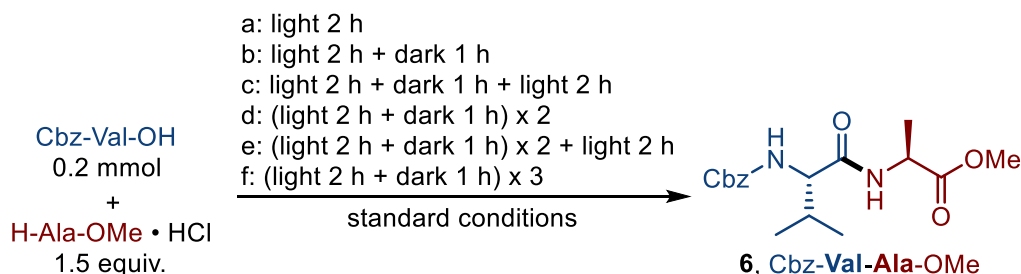

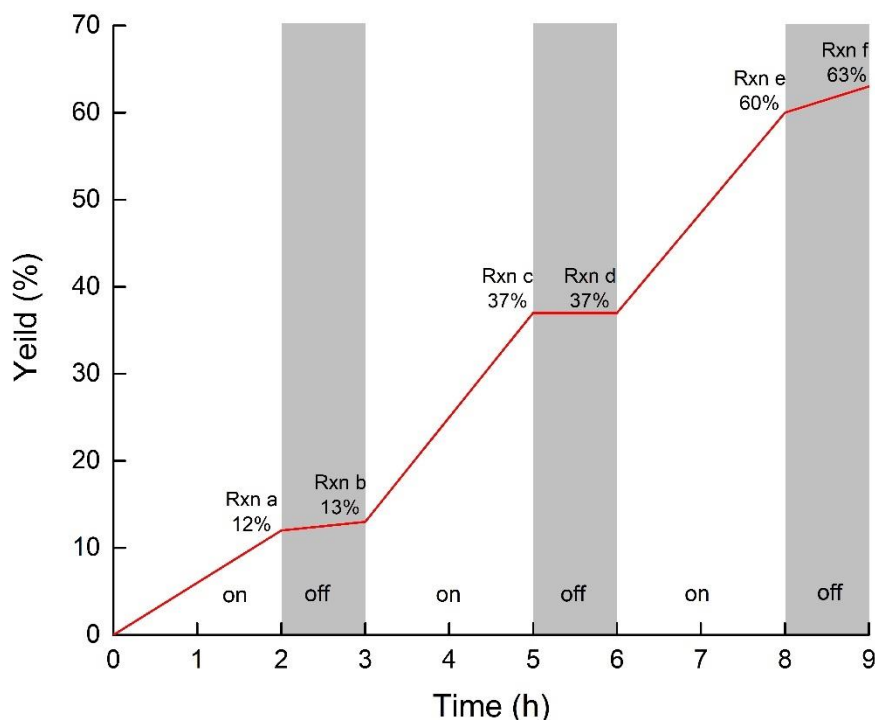

**Figure S7.** Light on/off experiments

### 7.3 Detection of hydrogen

In order to verify the evolution of  $H_2$  during the reaction, the gas phase in the headspace of the reaction vessel was analyzed by gas chromatography after reaction for 12 h. As shown in figure S8, 0.48 mmol  $H_2$  was detected by GC analysis using pure helium as an internal standard (Table S11 and Eq. S1). The control experiments (Table S12) indicated that a maximum amount of  $H_2$  was detected under standard conditions. Only 0.04 mmol  $H_2$  was detected in the absence of TMDS and  $InBr_3$  (Table S12, entry 6). These results demonstrated that  $H_2$  was generated from both  $Co^{III}-H$  and TMDS (Table S12).<sup>4</sup>

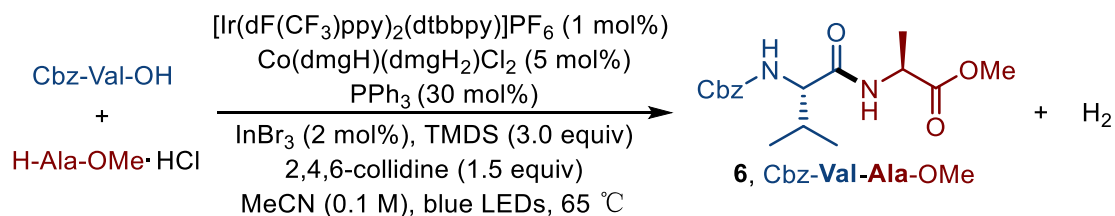

According to the general procedure (section S2.2), Cbz-L-Val-OH (0.2 mmol, 1.0 equiv.), L-Ala-OMe·HCl (0.3 mmol, 1.5 equiv.),  $PPh_3$  (0.06 mmol, 30 mol%),  $InBr_3$  (2 mol%),  $[Ir(dF(CF_3)ppy)_2(dtbbpy)]PF_6$  (1 mol%) and  $Co(dmgh)(dmgh_2)Cl_2$  (5 mol%)

were added to an oven-dried reaction tube equipped with a stir bar. The tube was sealed and placed under nitrogen before MeCN (2 mL), TMDS (0.6 mmol, 3.0 equiv.) and 2,4,6-collidine (0.3 mmol, 1.5 equiv.) were added. Then the system was stirred under the irradiation of blue LED lamps at 65 °C for 12 h. Then 5 mL helium was injected into the reaction tube and spread evenly for five minutes. 100  $\mu$ L mixture gas from the reaction tube was injected into the gas chromatography, and hydrogen was detected in 0.48 mmol. Then the reaction mixture was concentrated and purified through column chromatography to afford dipeptide **6** in 86% yield.

### 7.3.1 Data analysis

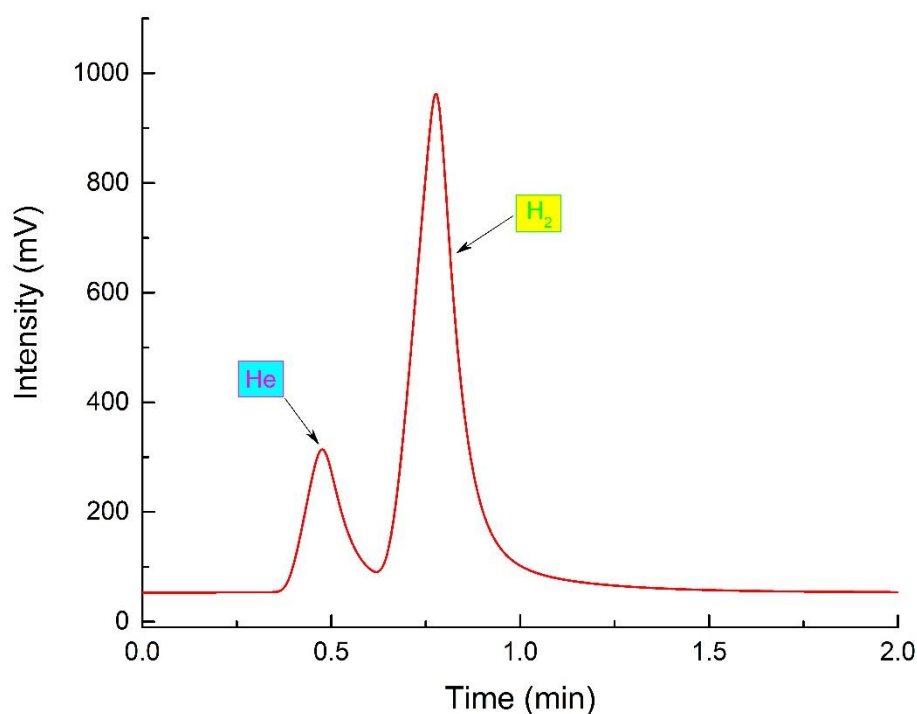

**Figure S8.** Monitoring of H<sub>2</sub> by GC.

**Table S11.** Data of GC

| Entry | RetTime (min) | Height ( $\mu$ V) | Area    |
|-------|---------------|-------------------|---------|
| 1     | 0.4760        | 261163            | 1889000 |
| 2     | 0.7773        | 909639            | 8293107 |

The conversion between the area and the amount of H<sub>2</sub> was calculated by equation S1.<sup>5</sup>

$$n_{H_2} = \frac{\frac{A_{H_2}}{A_{He}} \cdot f \cdot V_{He}}{V_m} \quad (\text{Eq. S1})$$

$n_{H_2}$  , The amount of H<sub>2</sub>, mmol

$A_{H_2}$  , The measured peak area of H<sub>2</sub>,

$A_{He}$  , The measured peak area of He,

$V_{He}$  , The volume of injected He, mL

$f = 0.5392$ , Response factor,<sup>3</sup>

$V_m = 24.5 \text{ mL} \cdot \text{mmol}^{-1}$ , molar volume (298.15 K, 101.325 kPa).

### 7.3.2 Control experiments

**Table S12.** Detection of H<sub>2</sub>

| Entry | Variation from standard conditions | amount of H <sub>2</sub> (mmol) <sup>a</sup> |
|-------|------------------------------------|----------------------------------------------|
| 1     | none                               | 0.48                                         |
| 2     | without PPh <sub>3</sub>           | 0.40                                         |
| 3     | without <b>PC</b> ·PF <sub>6</sub> | 0.43                                         |
| 4     | without cobaloxime <b>A</b>        | 0.42                                         |
| 5     | without light                      | 0.38                                         |
| 6     | without TMDS and InBr <sub>3</sub> | 0.04                                         |

<sup>a</sup>Determined by GC using pure He as an internal standard.

## 7.4 Amidation promoted by hydrosilanes

In view of the fact that hydrosilanes have been reported as coupling agents for amide bond formation,<sup>6</sup> we also examined the possibility of TMDS-promoted amidation. As shown in Table S13 and Figure S9, both the control experiments and NMR analysis indicated that TMDS was not a suitable coupling reagent for the amidation.

### 7.4.1 Control experiments

In the presence of 3.0 equiv. of PhSiH<sub>3</sub>, Cbz-Gly-OH coupled with glycine methyl ester to afford the desired dipeptide in 43% yield (Table S13, entry 1).<sup>7</sup> However, sterically hindered Cbz-Val-OH and H-Ala-OMe were not compatible with the conditions, only trace amount of the desired dipeptide was formed (Table S13, entry 2). These results were consistent with Charette's study.<sup>8</sup> In contrast, no product was detected when TMDS was utilized instead of PhSiH<sub>3</sub> (entry 3–6).

**Table S13.** The coupling of amino acids with [Si-H]

| $  \begin{array}{c}  \text{Cbz-AA}_1\text{-OH} \\  (0.2 \text{ mmol}, 1.0 \text{ equiv.}) \\  + \\  \text{H-AA}_2\text{-OMe}\cdot\text{HCl} \\  (1.5 \text{ equiv.})  \end{array}  \xrightarrow[\text{MeCN (0.1 M), 65 }^\circ\text{C}, \text{ N}_2, \text{ blue LEDs}]{\begin{array}{c} \text{[Si-H] (3.0 equiv.)} \\ \text{2,4,6-collidine (1.5 equiv.)} \end{array}}  \text{Cbz-AA}_1\text{-AA}_2\text{-OMe}  $ |                 |                 |                    |                    |
|--------------------------------------------------------------------------------------------------------------------------------------------------------------------------------------------------------------------------------------------------------------------------------------------------------------------------------------------------------------------------------------------------------------------|-----------------|-----------------|--------------------|--------------------|
| entry                                                                                                                                                                                                                                                                                                                                                                                                              | AA <sub>1</sub> | AA <sub>2</sub> | [Si-H]             | Yield <sup>a</sup> |
| 1                                                                                                                                                                                                                                                                                                                                                                                                                  | Gly             | Gly             | PhSiH <sub>3</sub> | 43%                |
| 2                                                                                                                                                                                                                                                                                                                                                                                                                  | Val             | Ala             | PhSiH <sub>3</sub> | trace              |
| 3                                                                                                                                                                                                                                                                                                                                                                                                                  | Gly             | Gly             | TMDS               | N.R.               |
| 4                                                                                                                                                                                                                                                                                                                                                                                                                  | Val             | Ala             | TMDS               | N.R.               |
| 5 <sup>b</sup>                                                                                                                                                                                                                                                                                                                                                                                                     | Gly             | Gly             | TMDS               | N.R.               |
| 6 <sup>b</sup>                                                                                                                                                                                                                                                                                                                                                                                                     | Val             | Ala             | TMDS               | N.R.               |

<sup>a</sup>Yields of isolated products. <sup>b</sup>InBr<sub>3</sub> (2 mol%) was added.

#### 7.4.2 NMR analysis

Related studies by Denton<sup>9</sup> and Arora<sup>3b</sup> have demonstrated that phenylsilylester is the key intermediate for the hydrosilane-promoted amidation. To probe the mechanism, several control experiments and <sup>19</sup>F NMR spectroscopic were conducted to identify the silylester intermediate.

Firstly, we tried to detect the proposed silylester intermediates through the PhSiH<sub>3</sub> promoted amidation (Figure S9). As shown in Figure S9b, when 4-fluorobenzoic acid **66** (<sup>19</sup>F δ –108.3 ppm) and benzylamine **67** were mixed in MeCN at 65 °C, the expected ammonium carboxylate was formed at δ –112.7 ppm. After addition of PhSiH<sub>3</sub> to the mixture for 5 h, we detected the formation of the desired amide **68** (δ –111.4 ppm). Furthermore, other new multiple signals were appeared at δ –106 to –108 ppm, which were assigned to the silylester intermediates. When water (0.1% TFA) was added to the reaction, the multiple signals quickly hydrolyzed back into the ammonium carboxylate and the reaction gave the product **68** in 44% yield within 12 h.

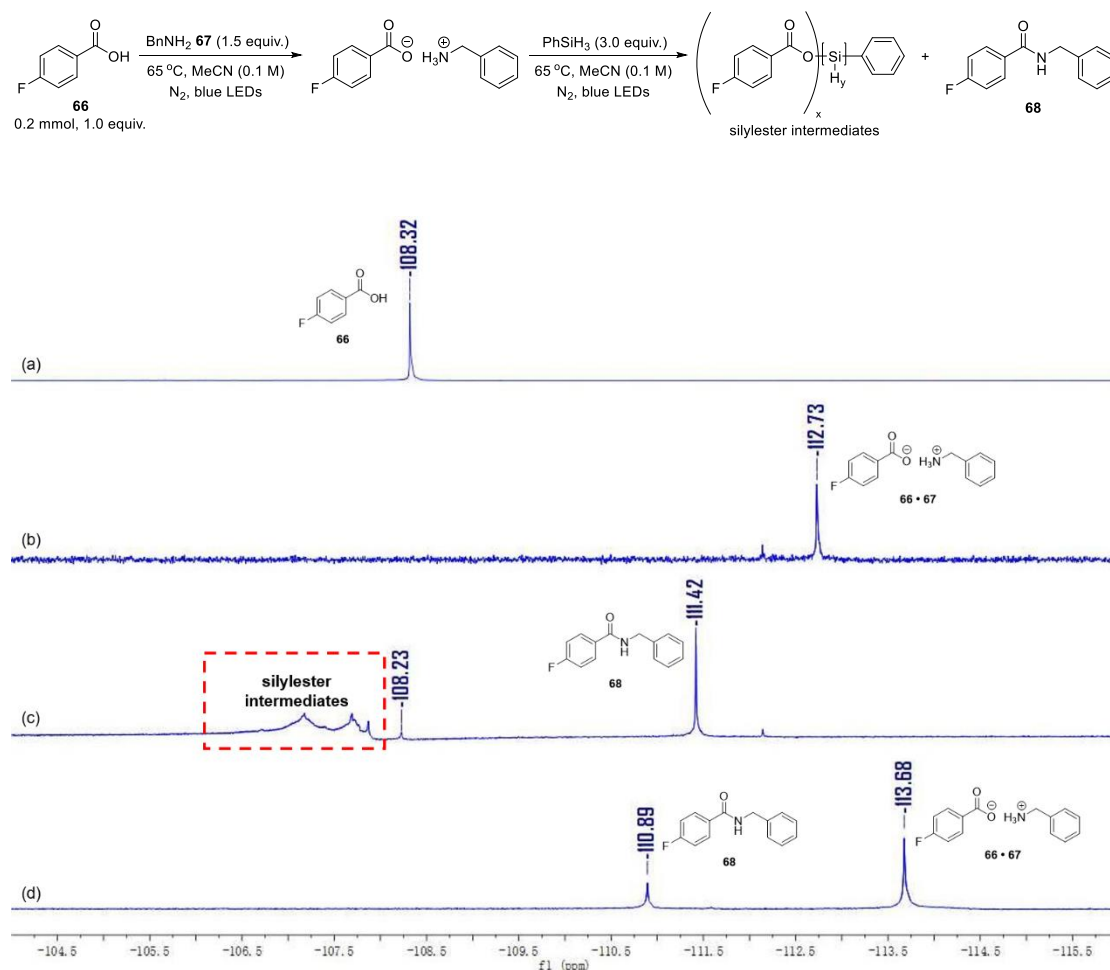

**Figure S9.** Evolution of the <sup>19</sup>F NMR spectra during the reaction (chemcalc shift was calibrated by hexafluorobenzene at δ -164.9 ppm). (a) 4-fluorobenzoic acid **66**, (b) a mixture of 4-fluorobenzoic acid **66** and benzylamine **67**, (c) after addition of PhSiH<sub>3</sub> for 5 h, and (d) after quenching with water (0.1% TFA).

Then TMSD and InBr<sub>3</sub> were utilized to repeat above studies. As shown in Figure S10c, when TMSD and InBr<sub>3</sub> were added to the mixture of 4-fluorobenzoic acid and benzylamine, no other signals appeared in the <sup>19</sup>F NMR spectrum, indicating that the silylester intermediates and products were not formed.

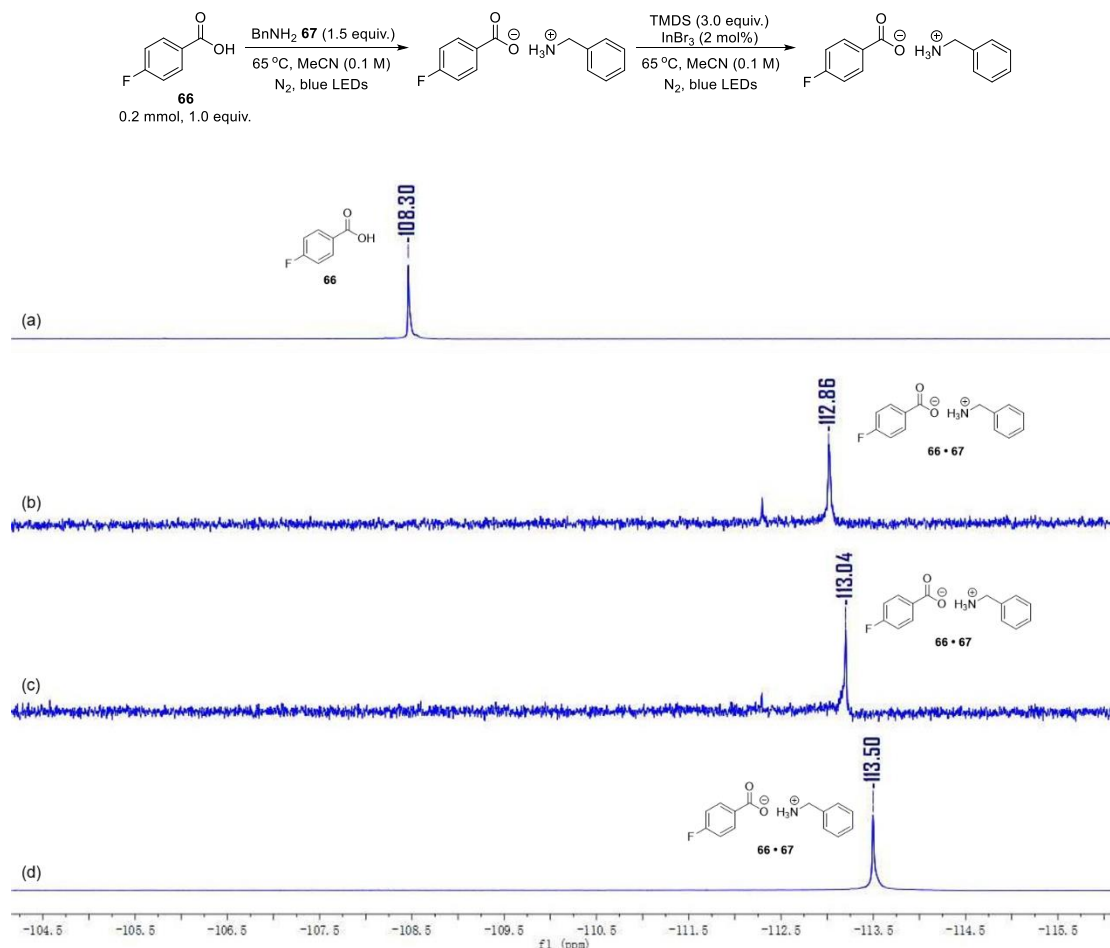

**Figure S10.** Evolution of the <sup>19</sup>F NMR spectra during the reaction (chemcal shift was calibrated by hexafluorobenzene at  $\delta$  -164.9 ppm). (a) 4-fluorobenzoic acid **66**, (b) a mixture of 4-fluorobenzoic acid **66** and benzylamine **67**, (c) after addition of TMSD and InBr<sub>3</sub> for 5 h, and (4) after quenching with water (0.1% TFA).

#### ***N*-benzyl-4-fluorobenzamide**

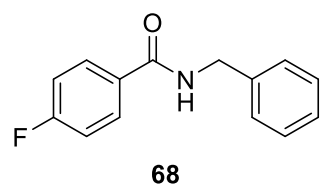

White solid, m.p.: 146 – 149 °C. <sup>1</sup>H NMR (400 MHz, CDCl<sub>3</sub>)  $\delta$  7.98 – 7.67 (m, 2H), 7.46 – 7.26 (m, 5H), 7.15 – 6.99 (m, 2H), 6.46 (s, 1H), 4.61 (d,  $J$  = 4.0 Hz, 2H). <sup>13</sup>C NMR (100 MHz, CDCl<sub>3</sub>)  $\delta$  166.2 (d,  $J$  = 31.0 Hz), 163.6, 138.1, 130.6 (d,  $J$  = 3.0 Hz), 129.4 (d,  $J$  = 9.0 Hz), 128.9, 128.0, 127.8, 115.7 (d,  $J$  = 22.0 Hz), 44.3. <sup>19</sup>F NMR (376 MHz, CDCl<sub>3</sub>)  $\delta$  -111.2. HRMS-ESI: calcd for C<sub>14</sub>H<sub>13</sub>NOF<sup>+</sup> ([M + H]<sup>+</sup>)  $m/z$  230.09757, found 230.09735.

## 7.5 Reduction of $\text{Ph}_3\text{P}=\text{O}$ to $\text{PPh}_3$

As shown in Figure S11, several control experiments were conducted to confirm the reduction of  $\text{Ph}_3\text{P}=\text{O}$ . Initially, a mixture of  $\text{Ph}_3\text{P}=\text{O}$ , TMDs,  $\text{InBr}_3$  and 2,4,6-collidine was irradiated by blue LEDs at 65 °C. After 12 h, only one signal at  $\delta -27.65$  ppm was detected by  $^{31}\text{P}$  NMR analysis of the mixture, which corresponds to  $\text{Ph}_3\text{P}=\text{O}$  (Figure S11a). Similar results were obtained, when **PC**· $\text{PF}_6$  or cobaloxime **A** was added to the reaction mixture (Figure S11b and c). However, when **PC**· $\text{PF}_6$  and cobaloxime **A** were added to the reaction at the same time, a new signal appeared at  $\delta -5.11$  ppm (Figure S11d), which was assigned to  $\text{PPh}_3$ . The formation of  $\text{PPh}_3$  was also confirmed by GCMS analysis (Figure S12), indicating that  $\text{Ph}_3\text{P}=\text{O}$  could be reduced to  $\text{PPh}_3$  in our condition. Further study to confirm the photoredox and cobaloxime promoted  $\text{P}^{\text{III}}/\text{P}^{\text{V}}=\text{O}$  catalysis is currently underway in our laboratory.

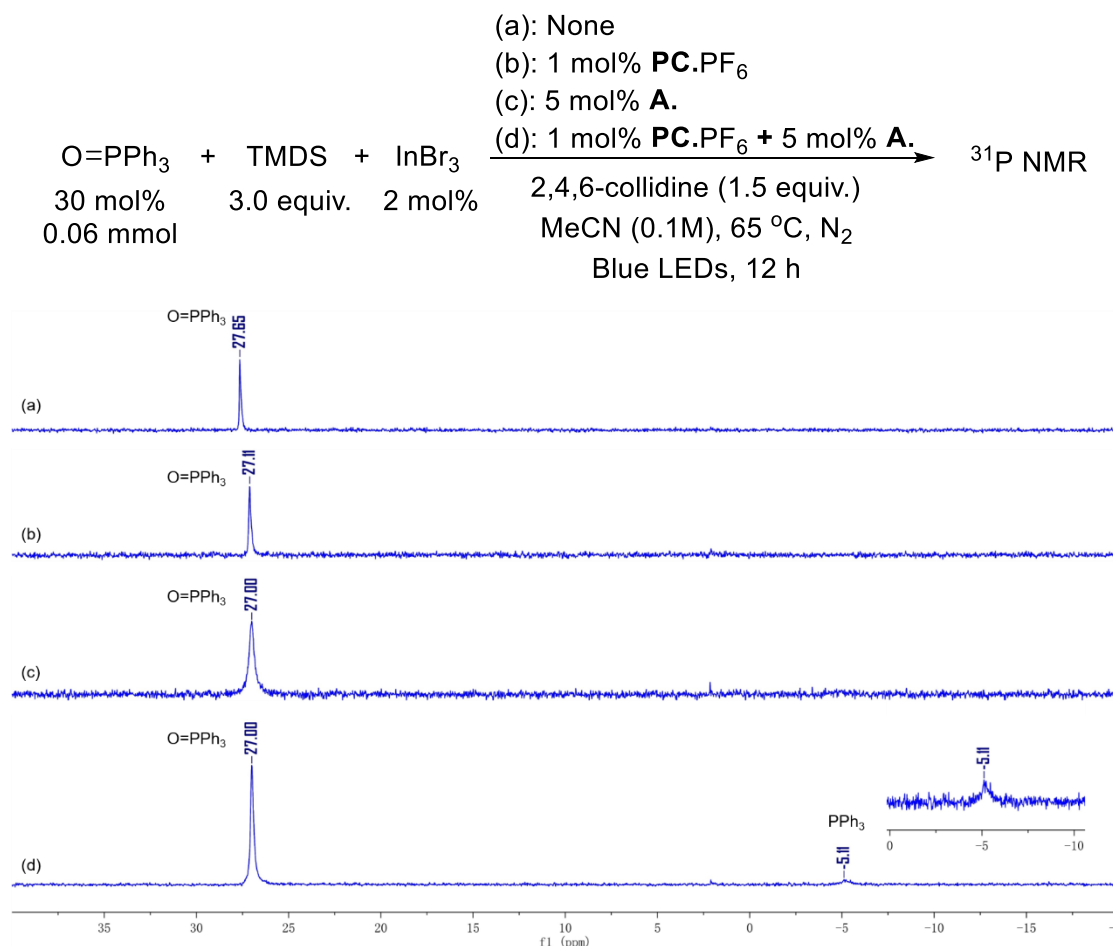

**Figure S11.** The  $^{31}\text{P}$  NMR spectra for the reduction of  $\text{Ph}_3\text{P}=\text{O}$  to  $\text{PPh}_3$  (chemshift was calibrated by triphenyl phosphite at  $\delta -127.7$  ppm).

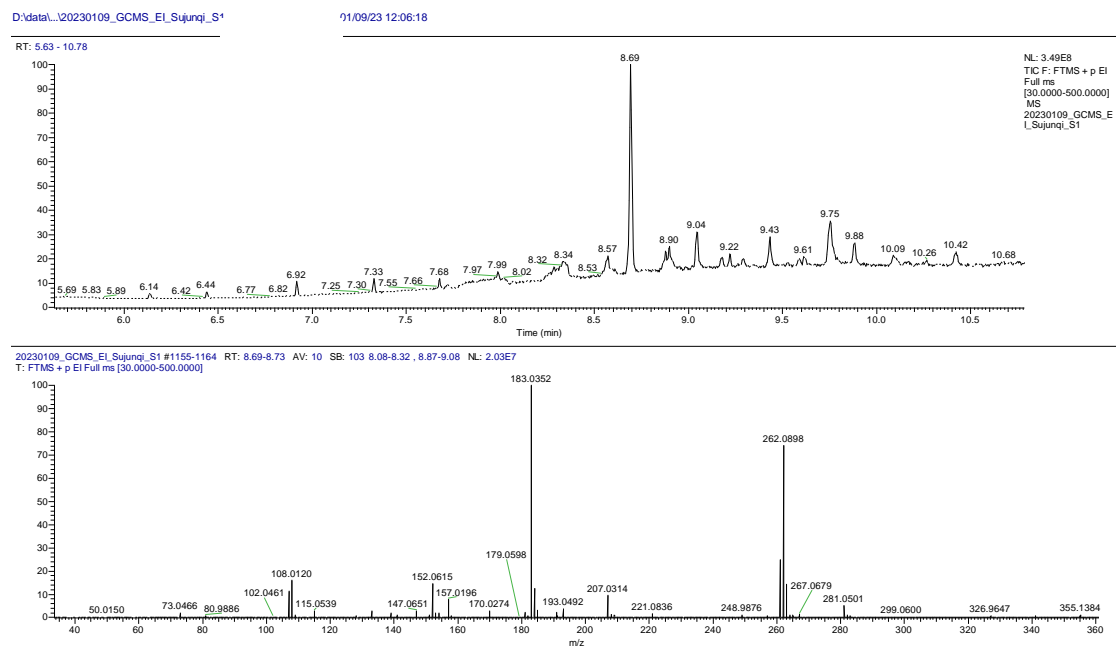

**Figure S12.** The GCMS spectra for the detection of PPh<sub>3</sub>.

## 8. References

- [1] M. S. Lowry, J. I. Goldsmith, J. D. Slinker, R. Rohl, R. A. Pascal, G. G. Malliaras, S. Bernhard, *Chem. Mater.* **2005**, *17*, 5712–5719.
- [2] X.-Y. Huang, R. Ding, Z.-Y. Mo, Y.-L. Xu, H.-T. Tang, H.-S. Wang, Y.-Y. Chen, Y.-M. Pan, *Org. Lett.* **2018**, *20*, 4819–4823.
- [3] J. Su, J.-N. Mo, X. Chen, A. Umanzor, Z. Zhang, K. N. Houk, J. Zhao. *Angew. Chem. Int. Ed.* **2022**, *61*, e202112668.
- [4] a) T. Coumbe, N. J. Lawrence, F. Muhammad. *Tetrahedron Lett.* **1994**, *35*, 625–628. b) Handoko, N. R. Panigrahi, P. S. Arora, *J. Am. Chem. Soc.* **2022**, *144*, 3637–3643.
- [5] L. Lin, W. Zhou, R. Gao, S. Yao, X. Zhang, W. Xu, S. Zheng, Z. Jiang, Q. Yu, Y.-W. Li, C. Shi, X.-D. Wen, D. Ma. *Nature* **2017**, *544*, 80–83.
- [6] J. J. Davies, D. C. Braddock, P. D. Lickiss, *Org. Biomol. Chem.* **2021**, *19*, 6746–6760.
- [7] E. Morisset, A. Chardon, J. Rouden, J. Blanchet, *Eur. J. Org. Chem.* **2020**, 388–392.
- [8] M. Sayes, A. B. Charette, *Green Chem.* **2017**, *19*, 5060–5064.
- [9] a) K. G. Andrews, R. Faizova, R. M. Denton, *Nat. Commu.* **2017**, *8*, 15913. b) E. L. Stoll, T. Tongue, K. G. Andrews, D. Valette, D. J. Hirst, R. M. Denton, *Chem. Sci.* **2020**, *11*, 9494–9500.

## 9. Copy of $^1\text{H}$ NMR and $^{13}\text{C}$ NMR spectra

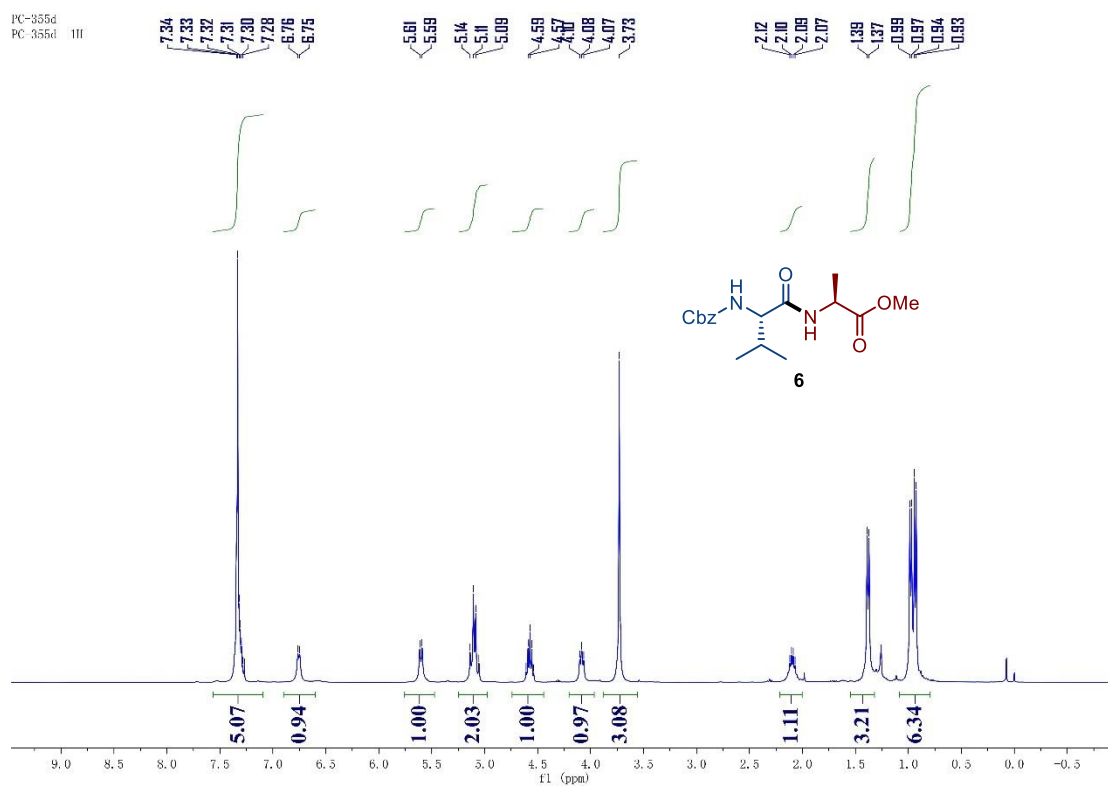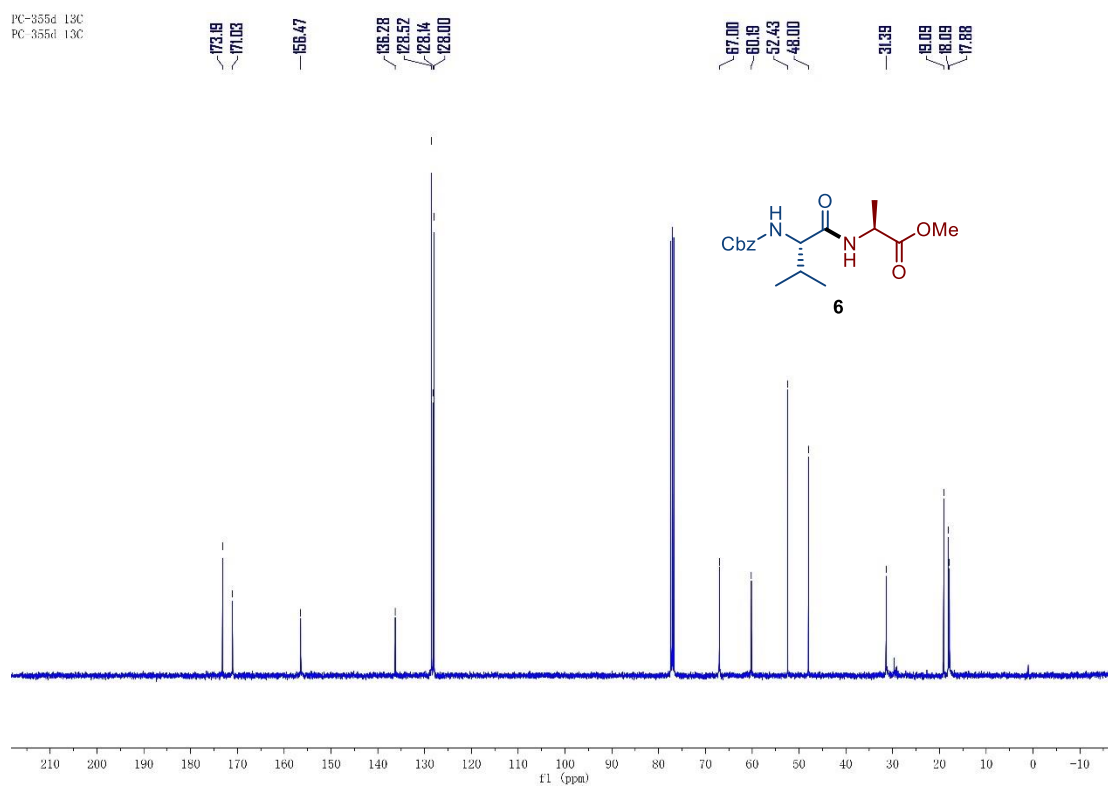

PC-362a  
PC-362a 1H

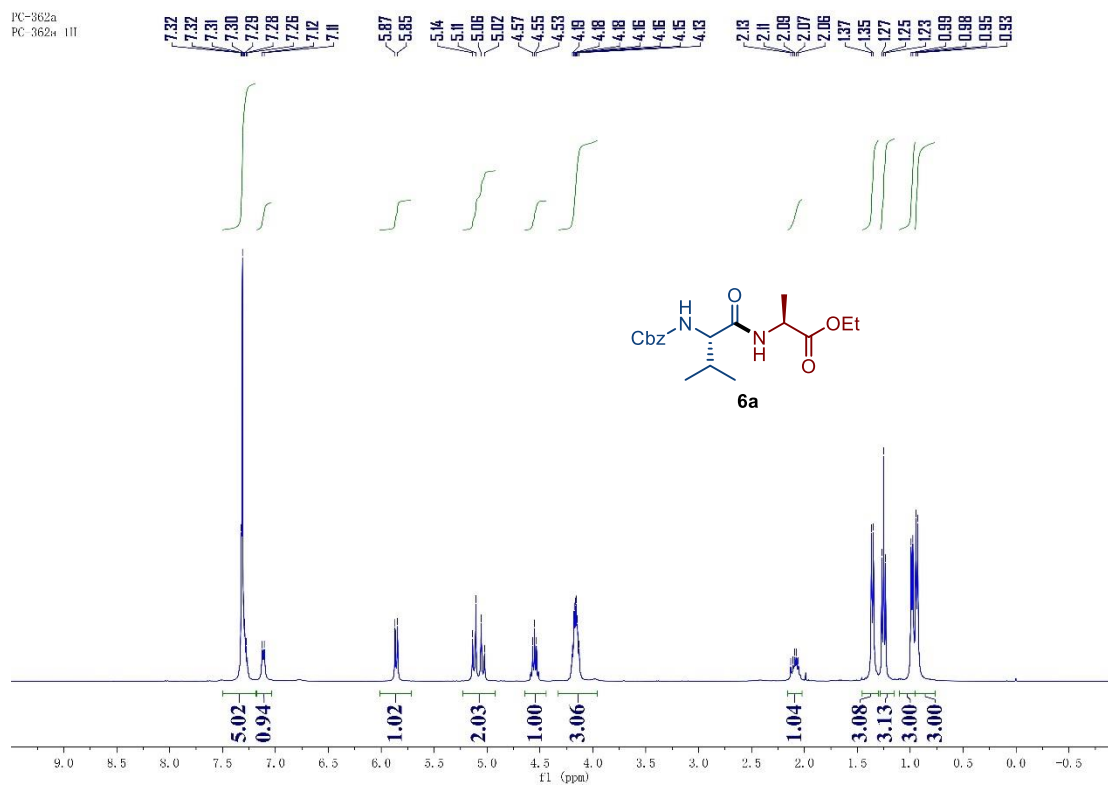

PC-362a  
PC-362a 13C

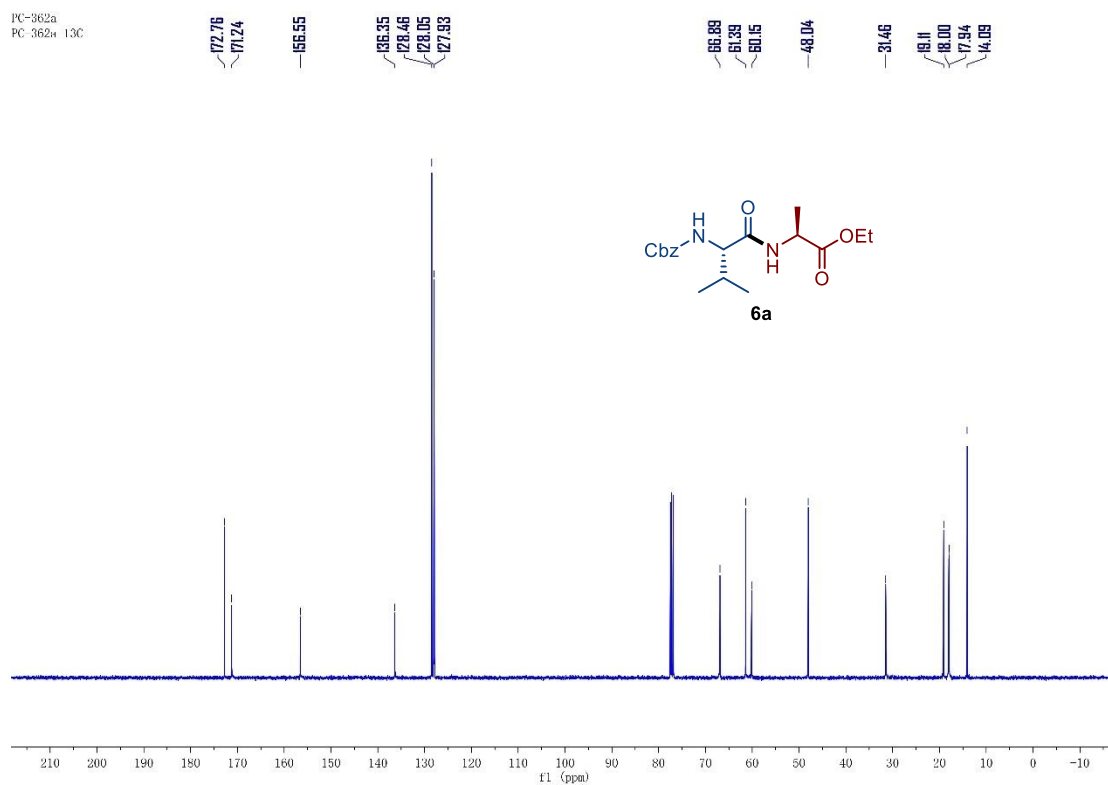

PC-362b  
PC-362b 1H

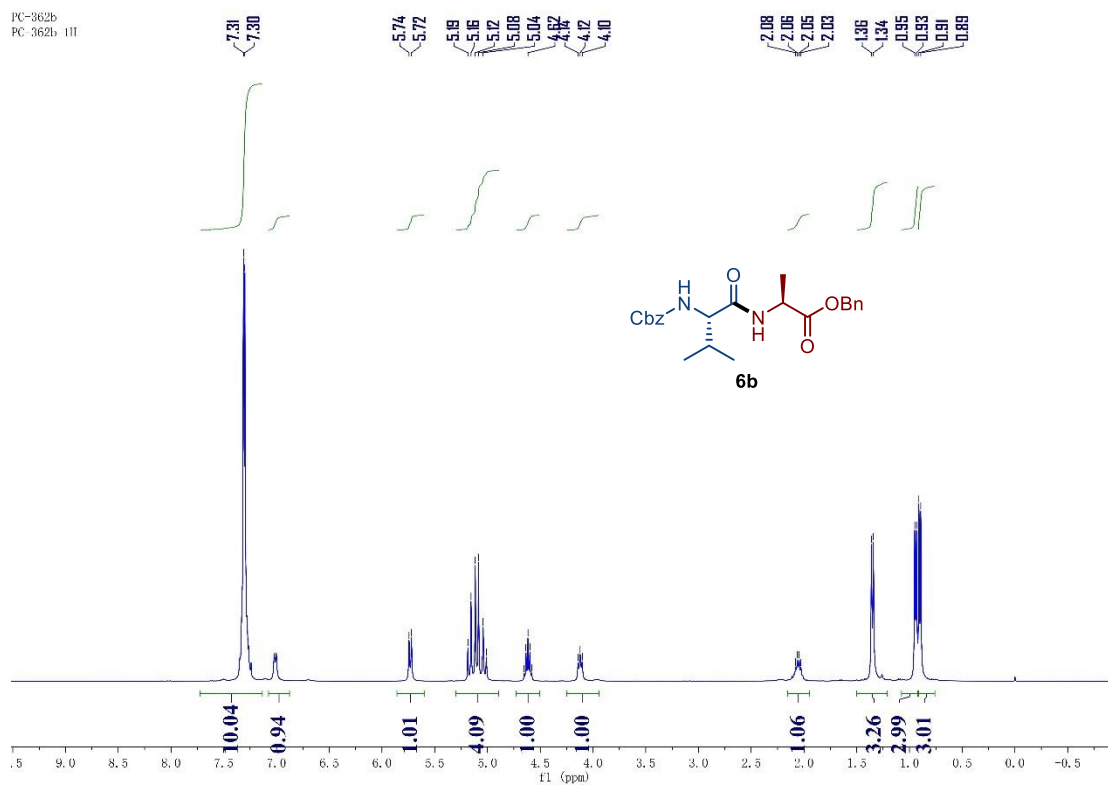

PC-362b  
PC-362b 13C

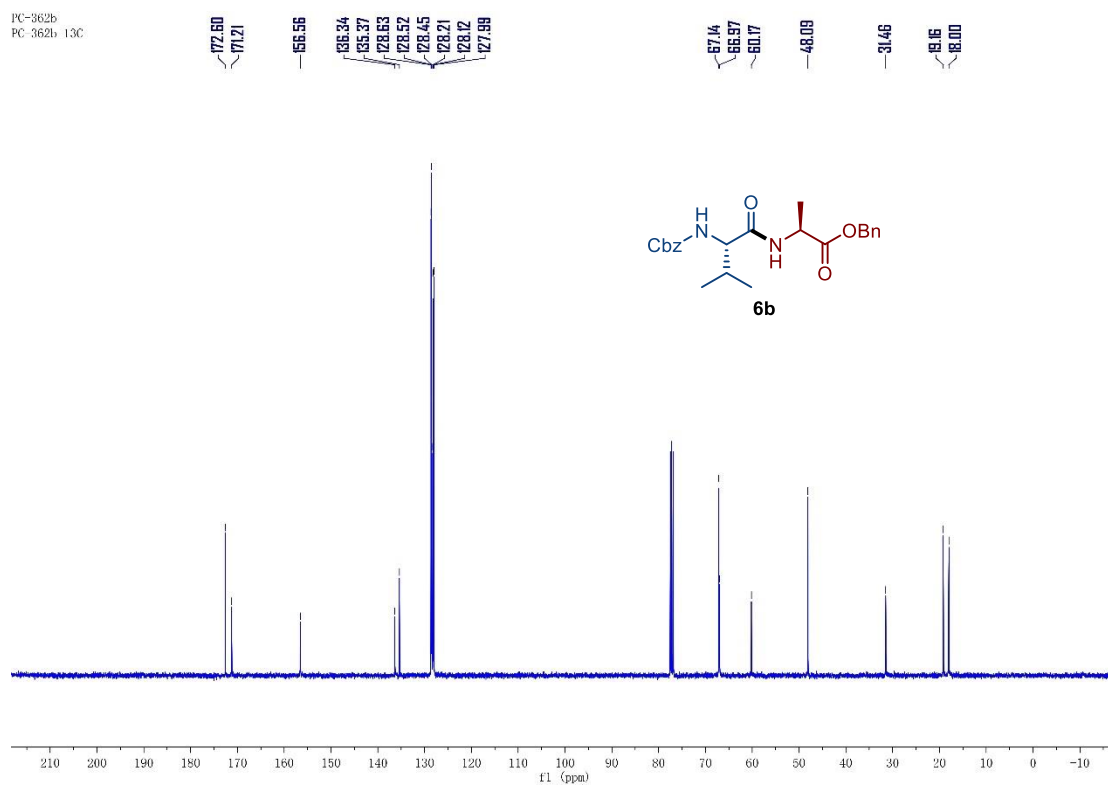

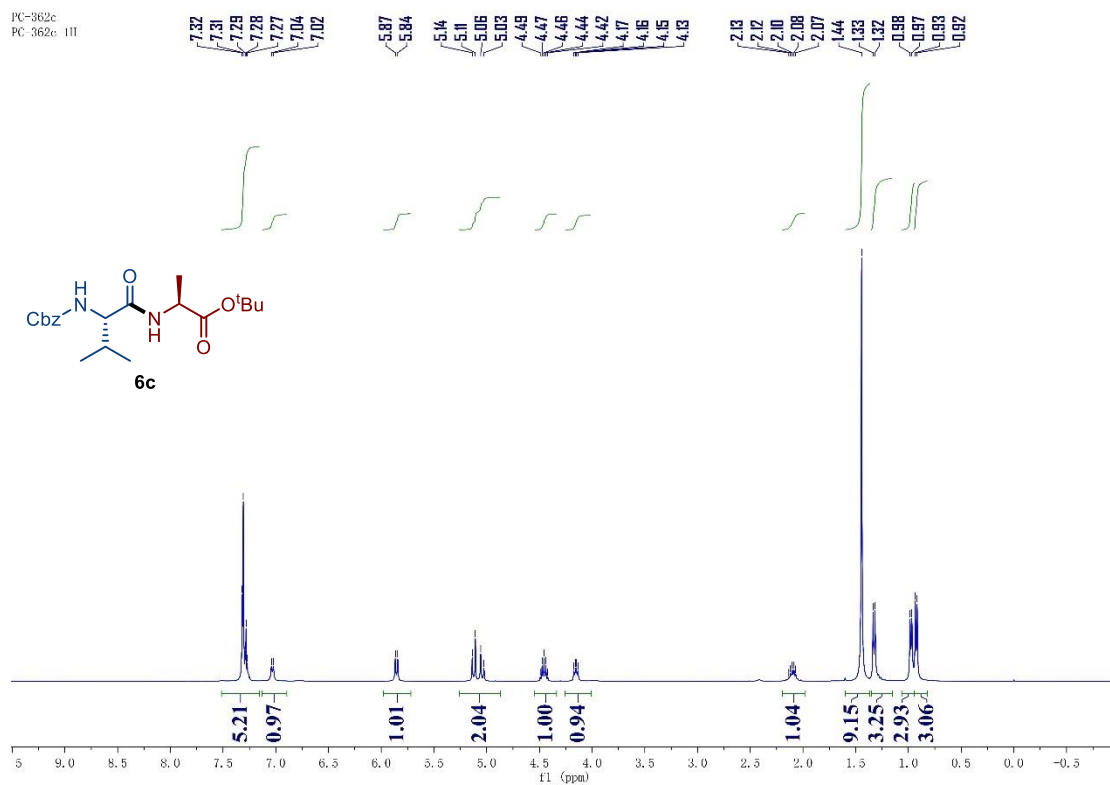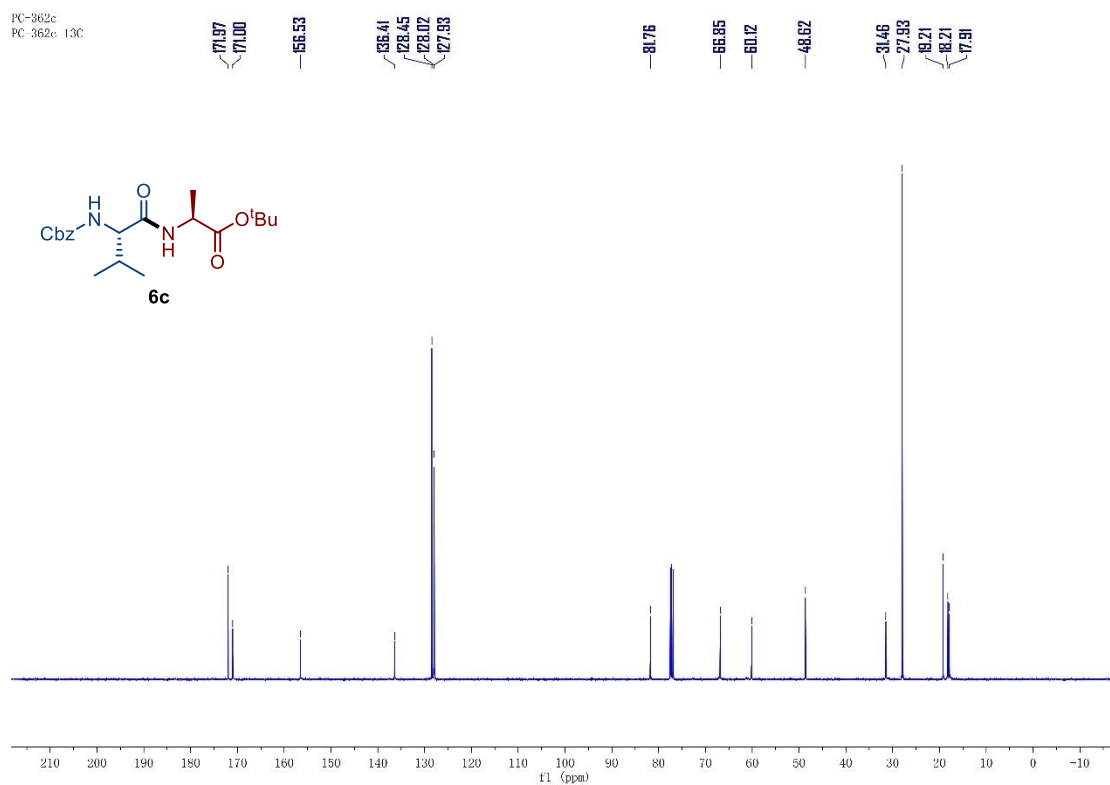

20230109-Supp-1-A  
20230109 Supp 1-A

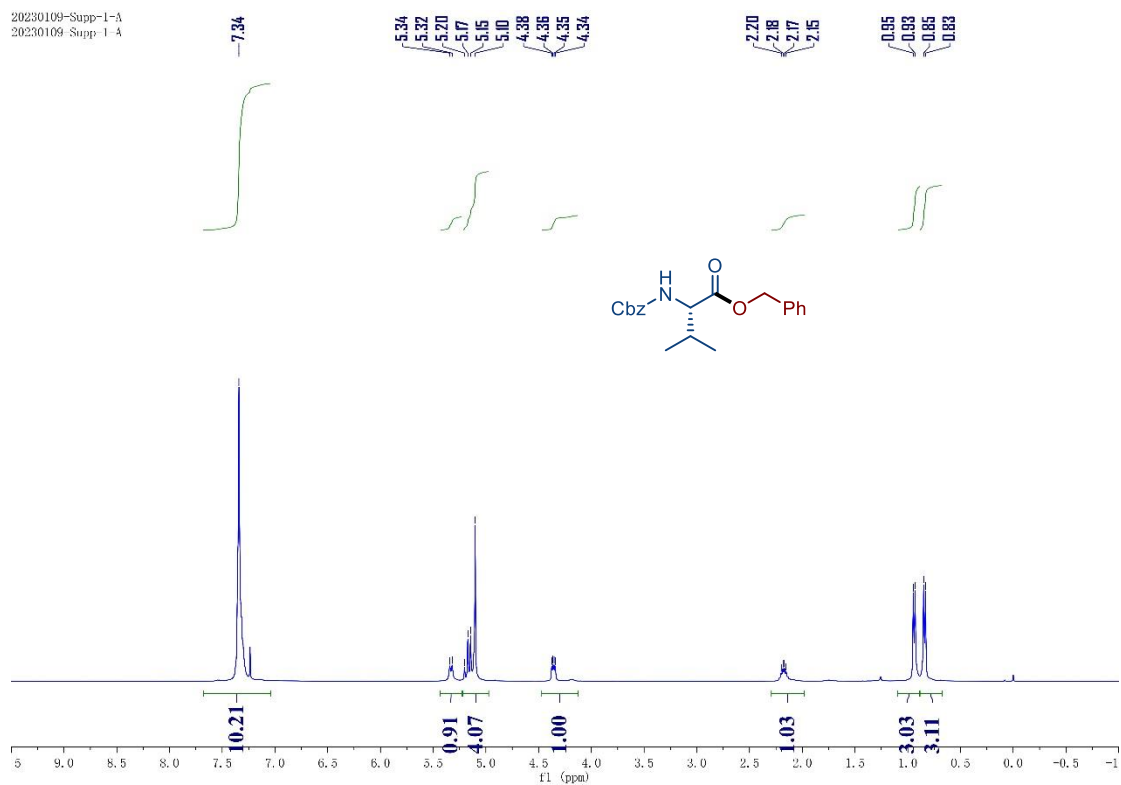

20230110-Supp-1-A  
20230110 Supp 1-A

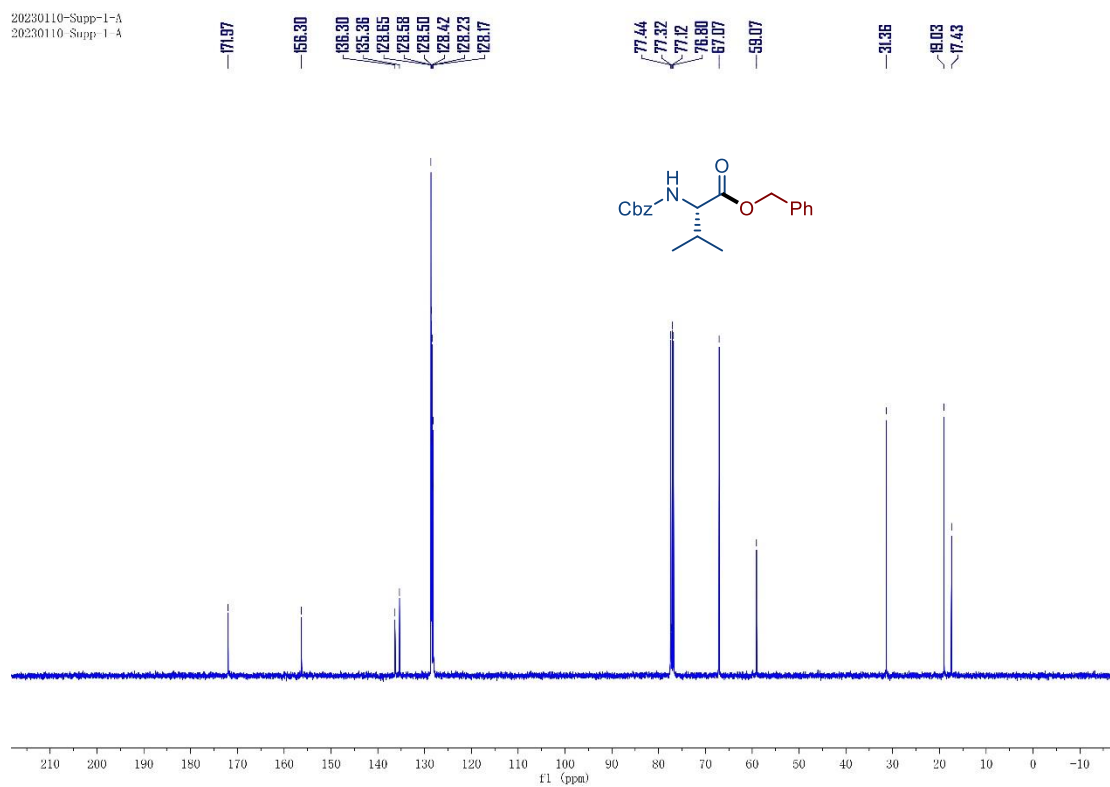

20230109-Supp-1-C  
20230109-Supp-1-C

Chemical structure: CC(C)[C@H](NC(=O)Sc1ccc(C)cc1)C(=O)Nc2ccccc2

<sup>1</sup>H NMR spectrum (CDCl<sub>3</sub>) showing peaks at 7.38, 7.37, 7.35, 7.34, 7.33, 7.28, 7.23, 7.21, 5.29, 5.27, 5.17, 4.51, 4.50, 4.49, 4.47, 2.37, 1.04, 1.03, 0.93, 0.91 ppm. Integration values are provided for several peaks: 5.02, 4.37, 0.98, 2.05, 1.00, 4.03, 3.08, 3.30.

20230111-Supp1-<sup>13</sup>C  
20230111-Supp1-<sup>13</sup>C

CC(C)[C@H](NC(=O)Sc1ccc(C)cc1)C(=O)Nc2ccc(C)cc2

199.71, 156.21, 139.97, 136.12, 134.56, 130.14, 128.67, 128.32, 128.19, 123.48, 67.37, 65.64, 31.28, 21.37, 19.46, 16.85

13C NMR spectrum (ppm): 199.71, 156.21, 139.97, 136.12, 134.56, 130.14, 128.67, 128.32, 128.19, 123.48, 67.37, 65.64, 31.28, 21.37, 19.46, 16.85.

20230109-Supp-1-E  
20230109 Supp 1 E

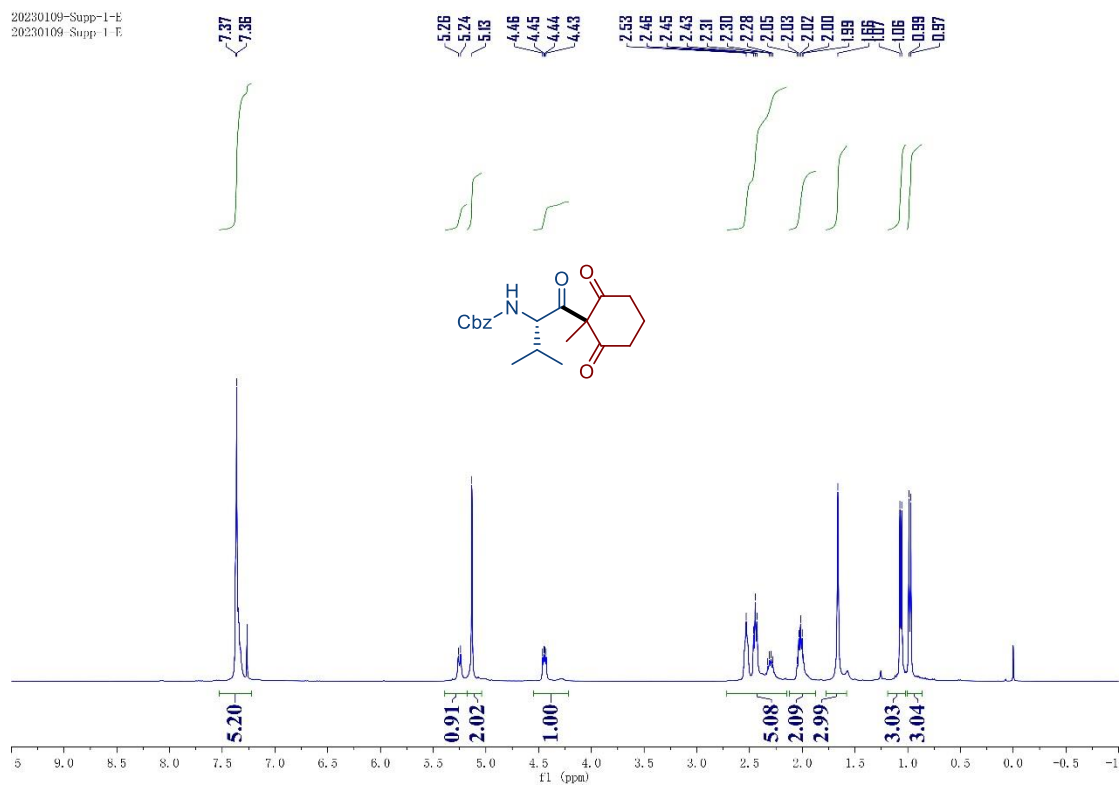

20230109-Supp-1-E  
20230109 Supp 1 E

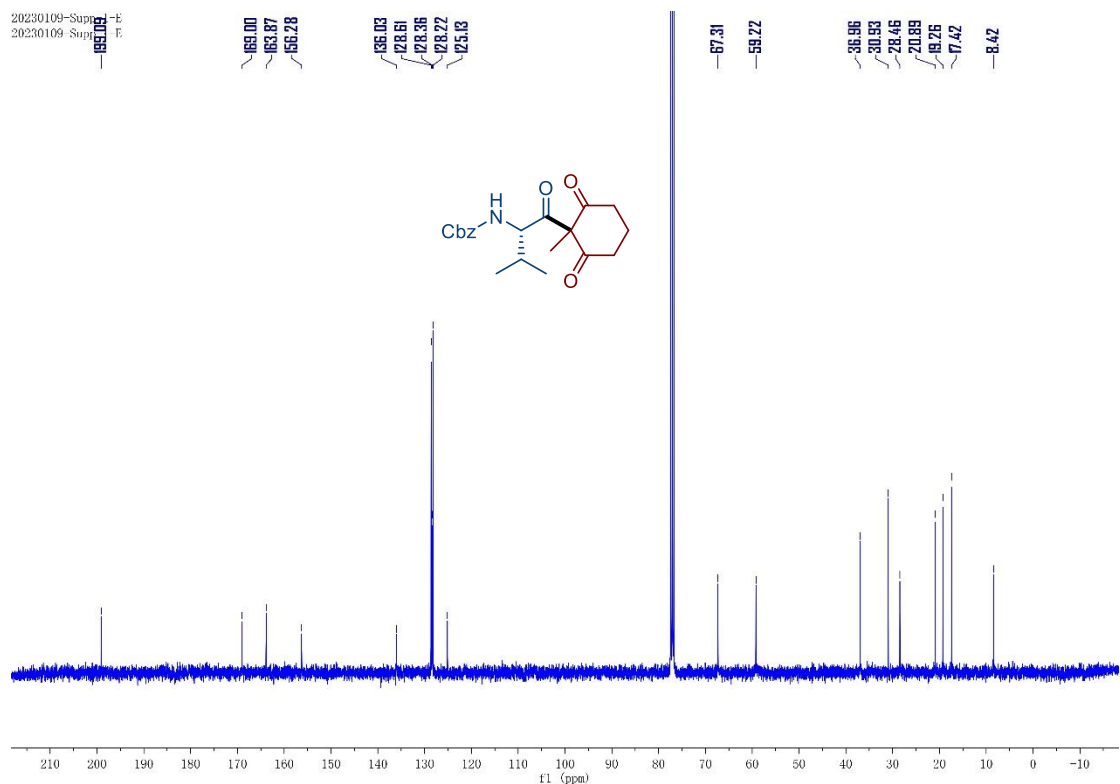

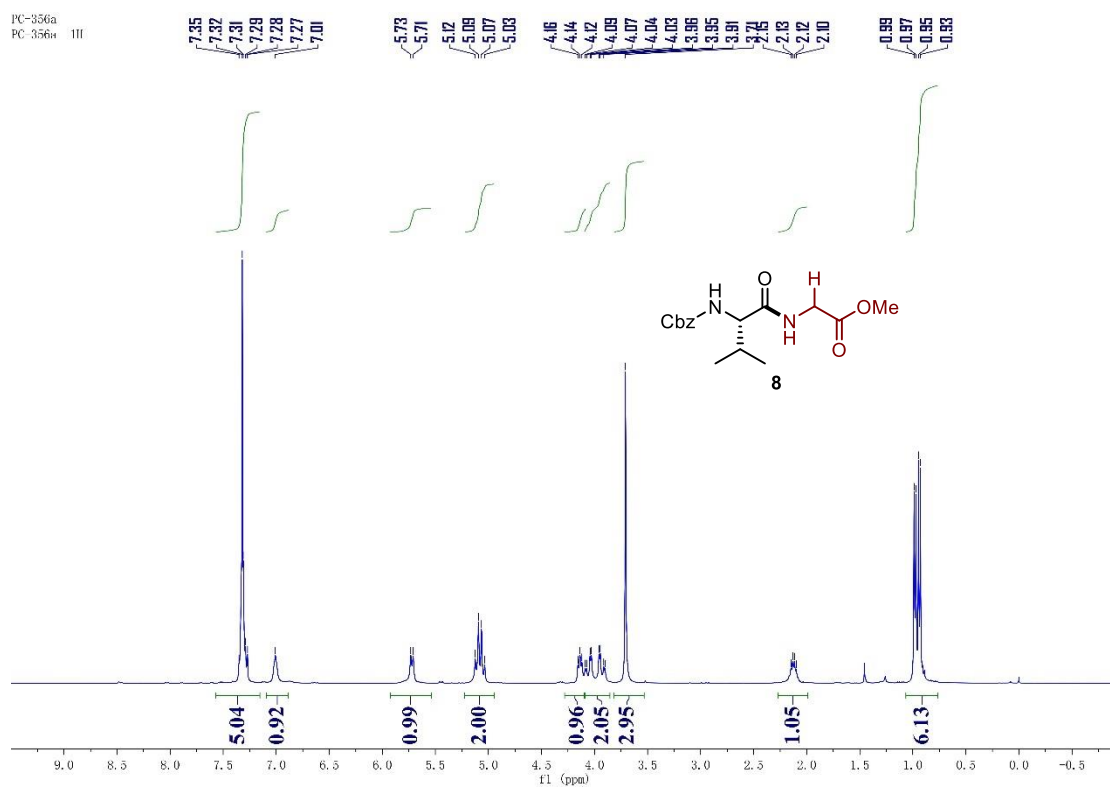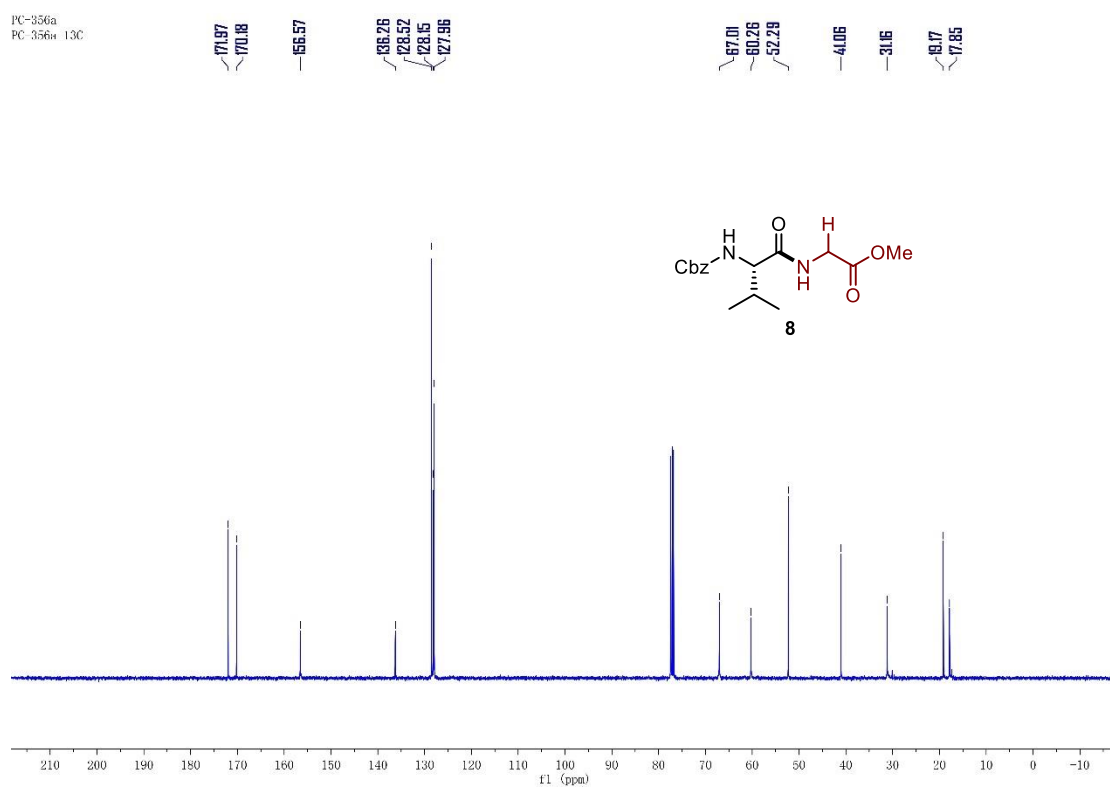

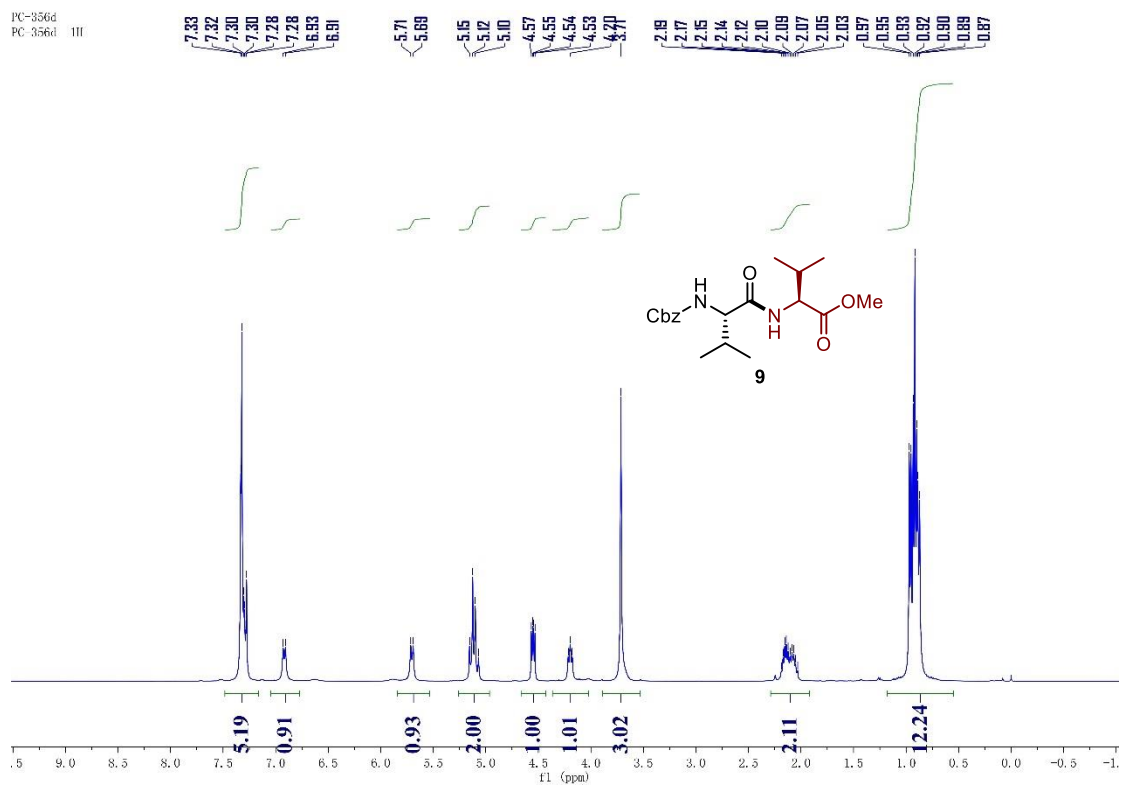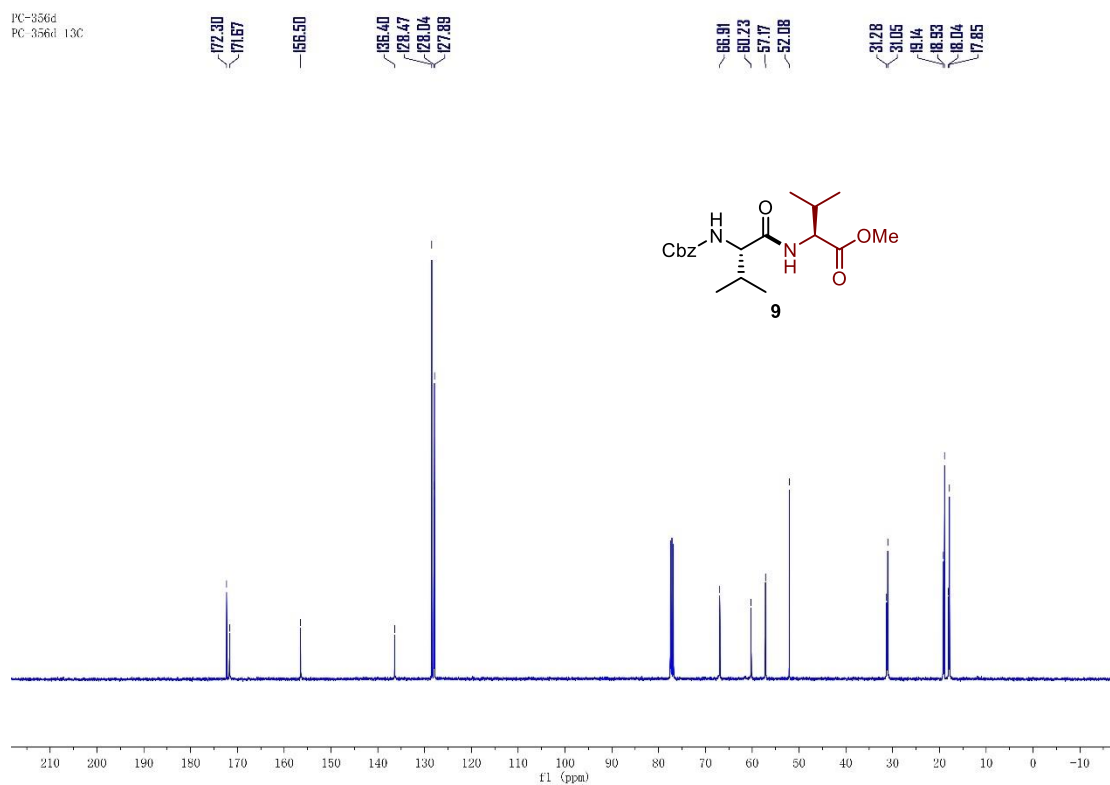

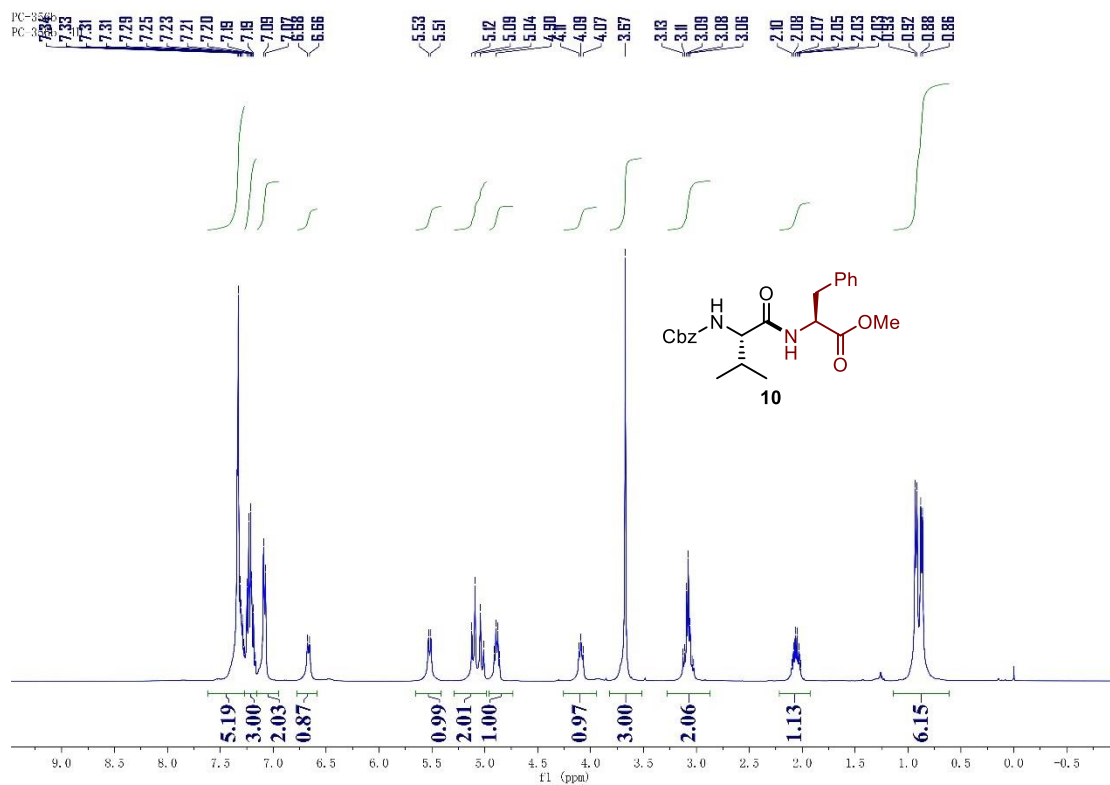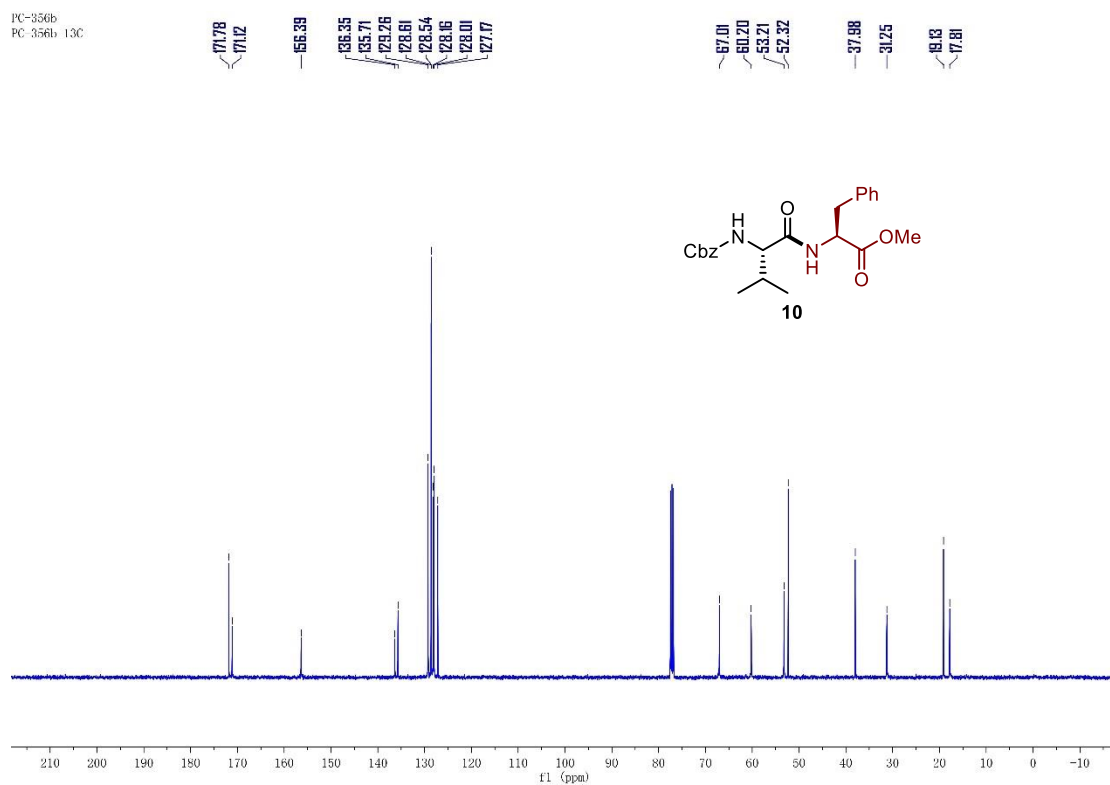

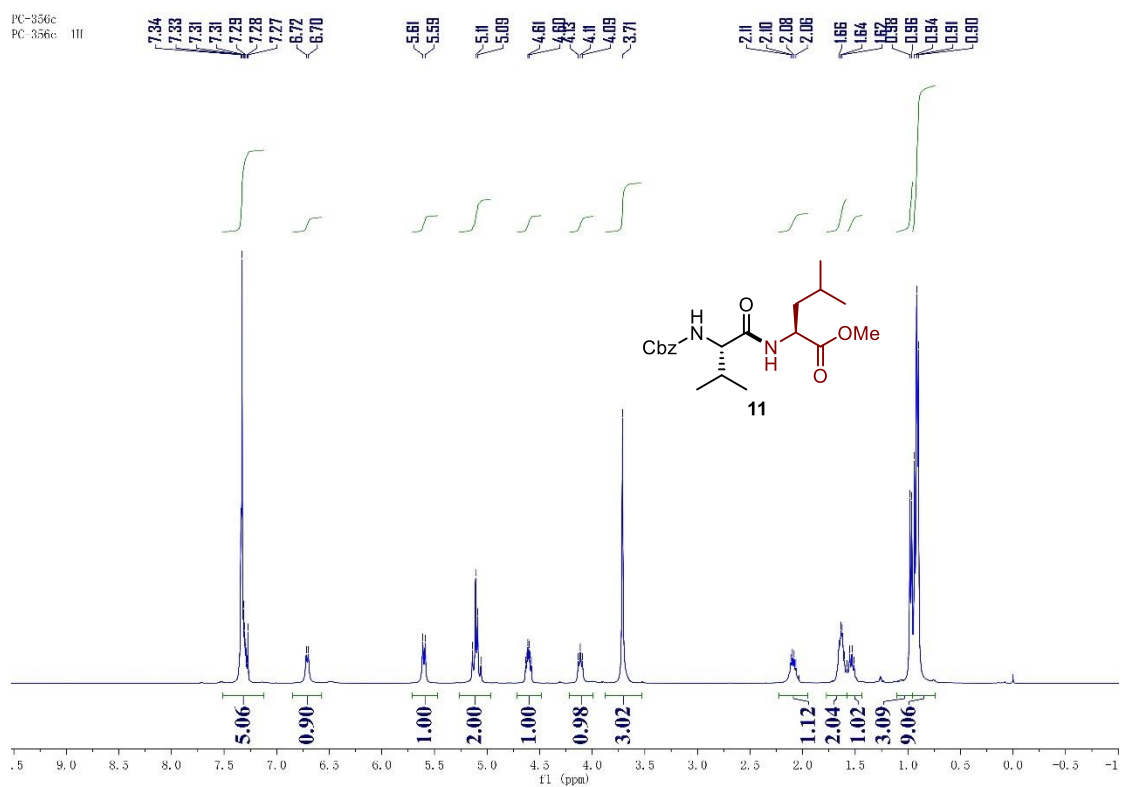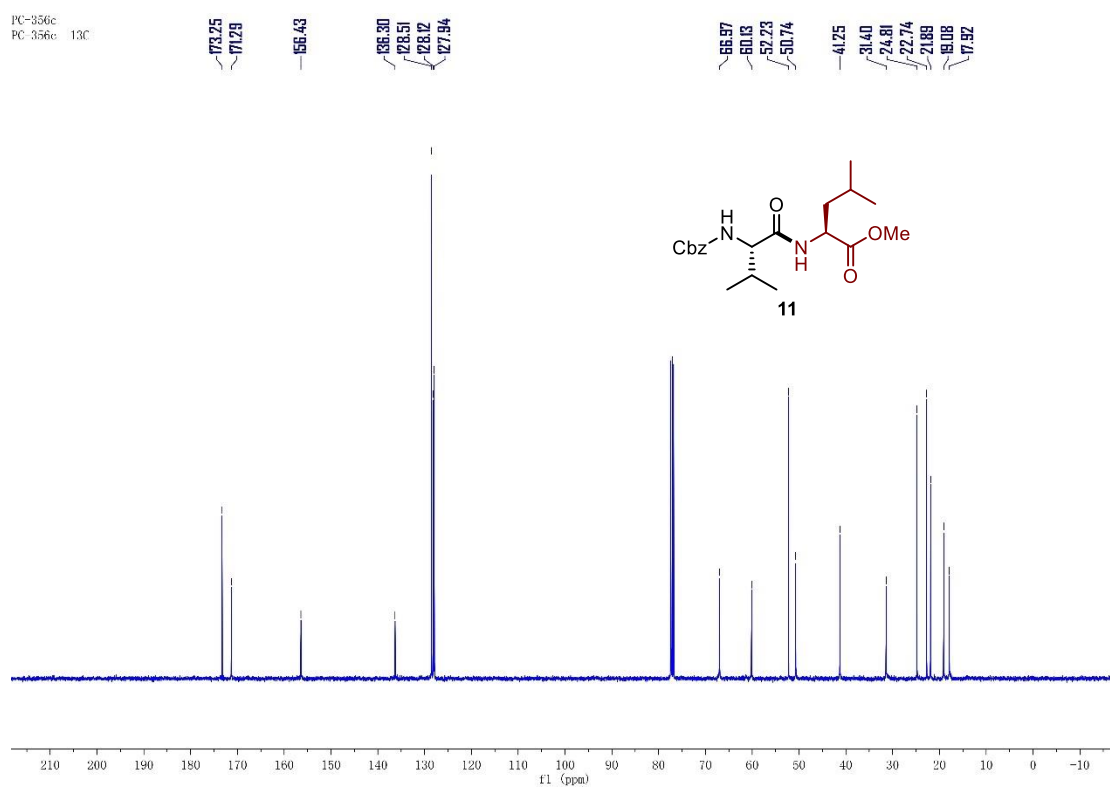

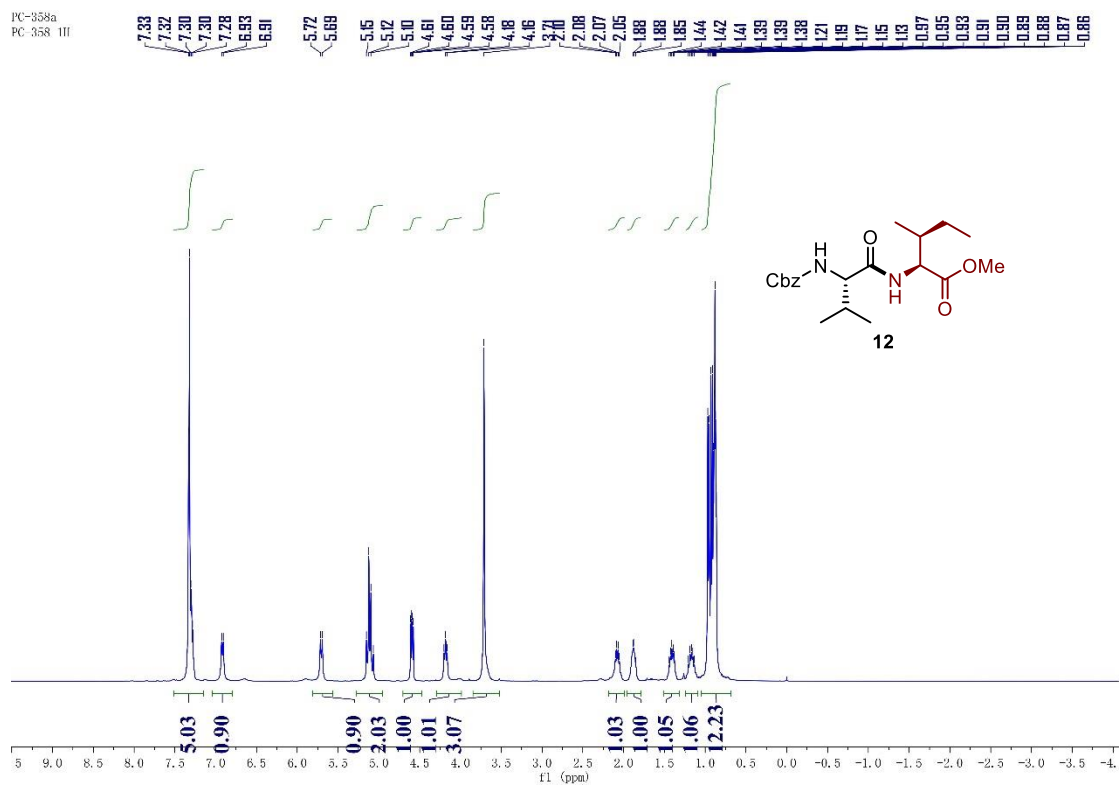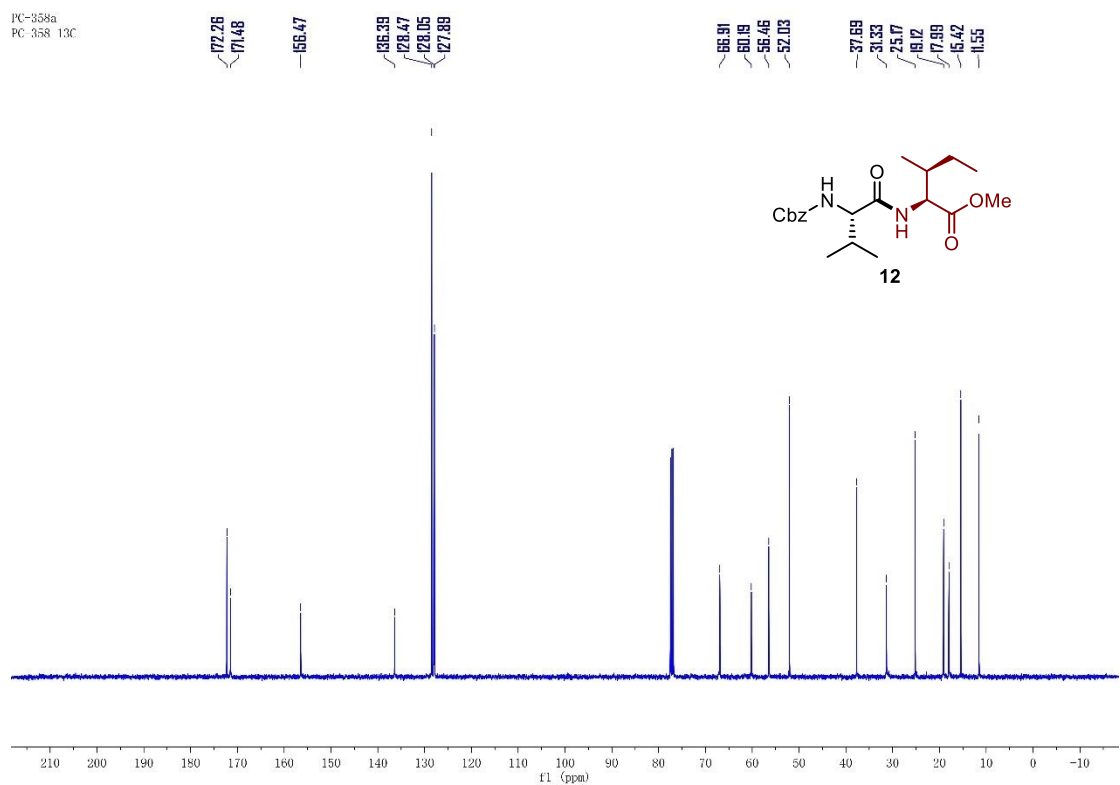

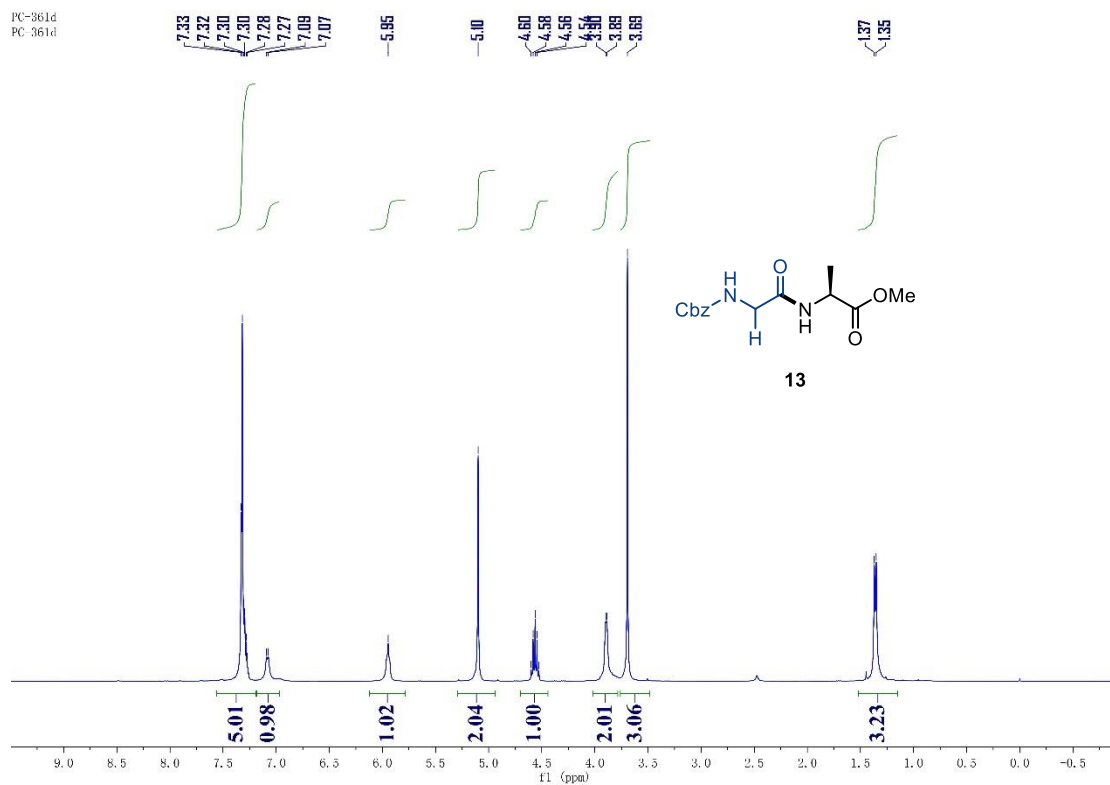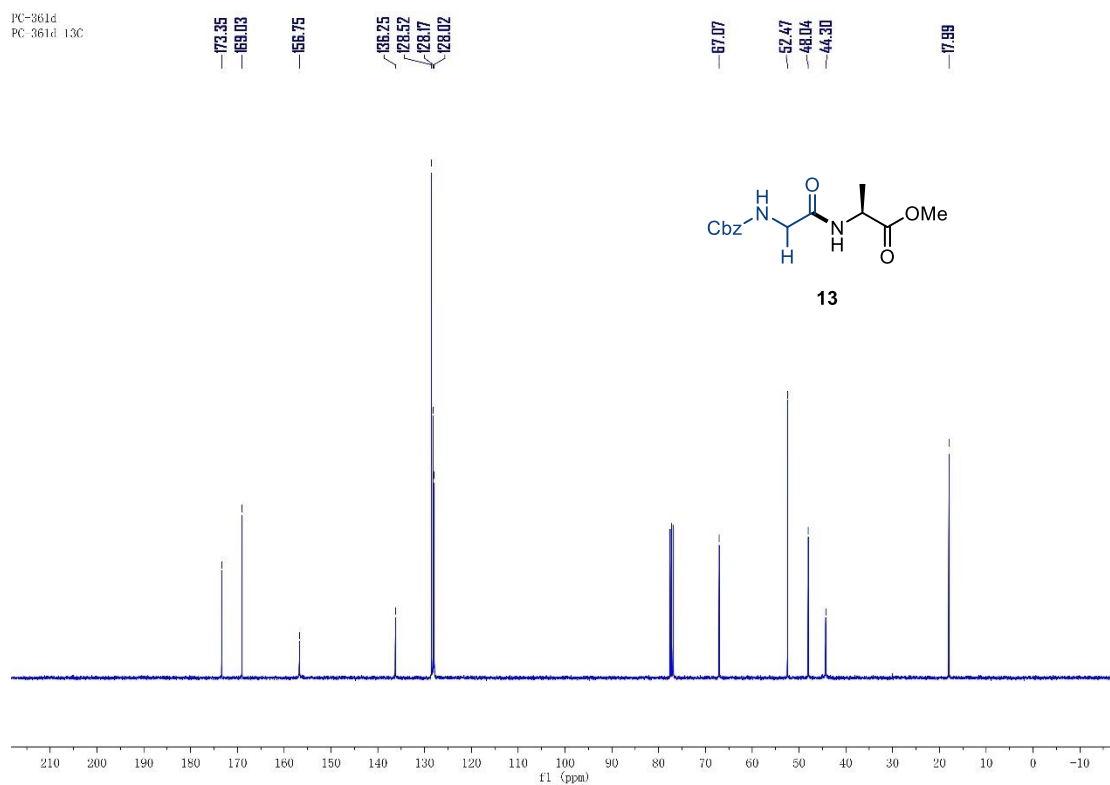

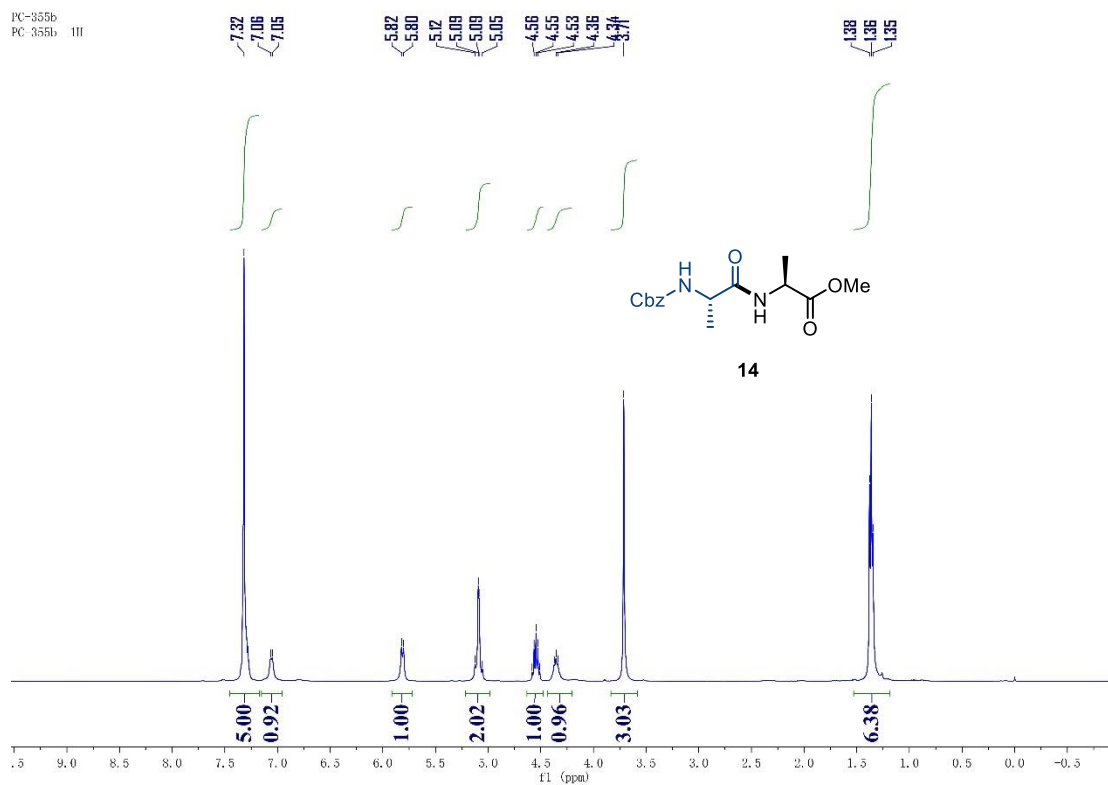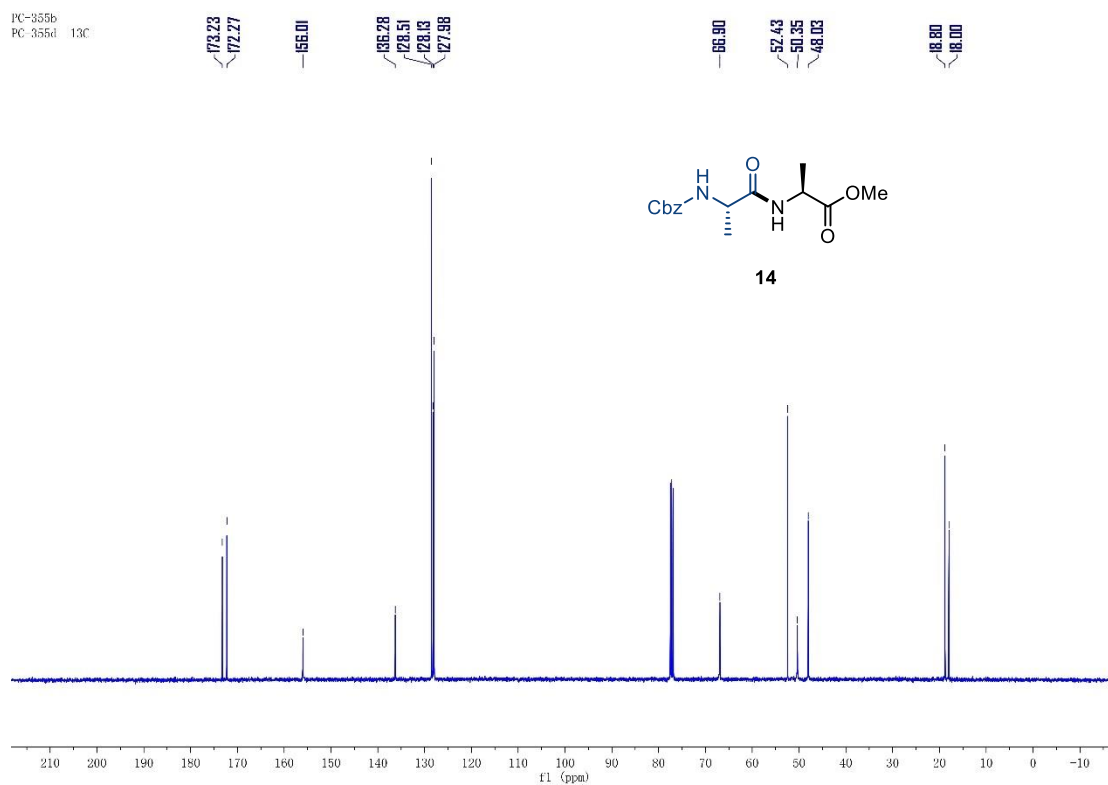

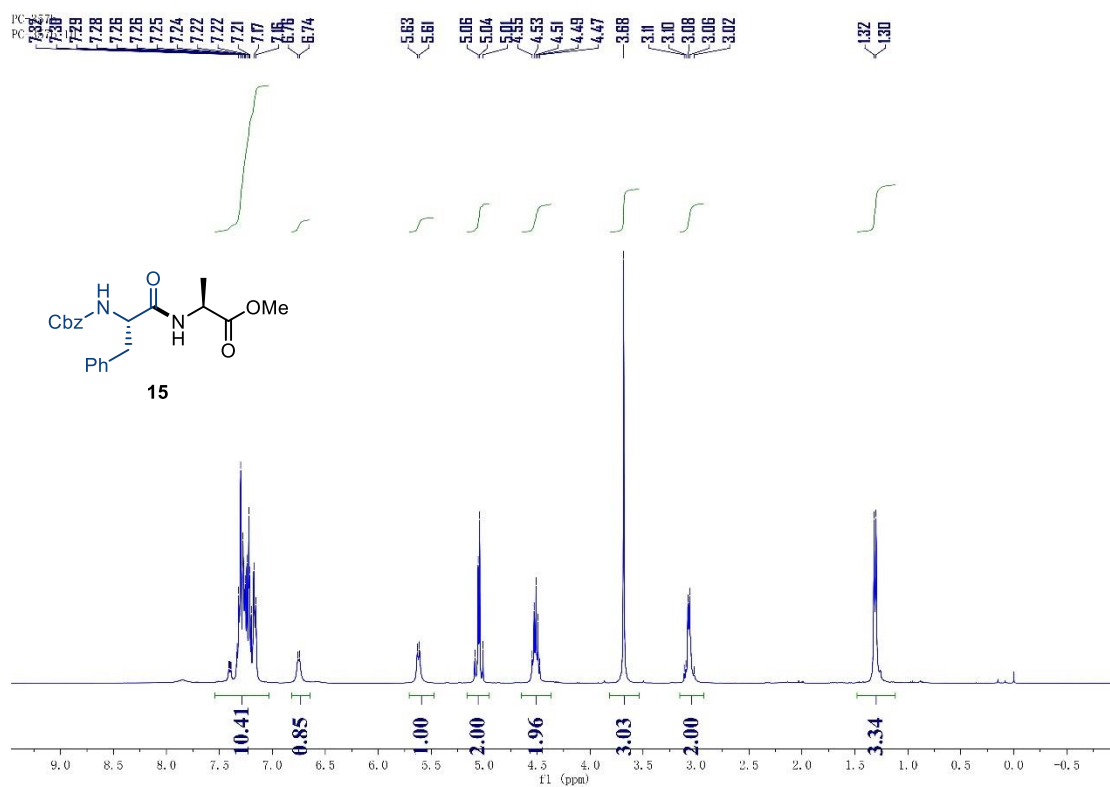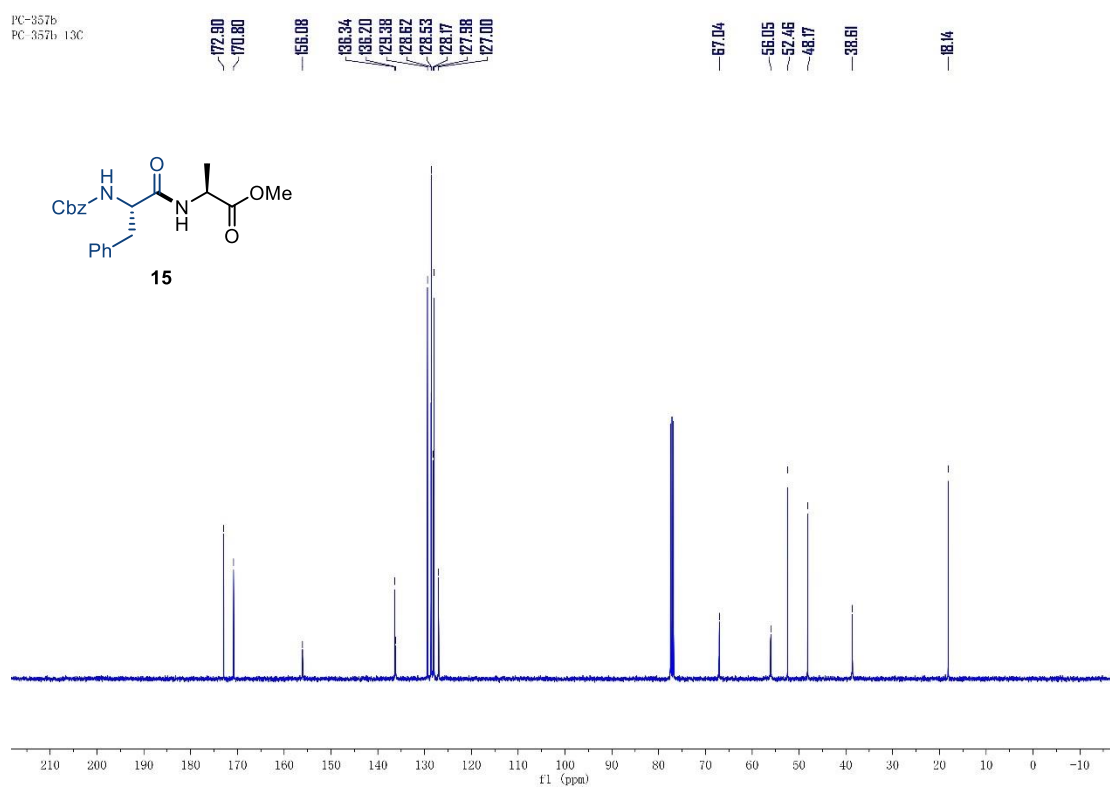

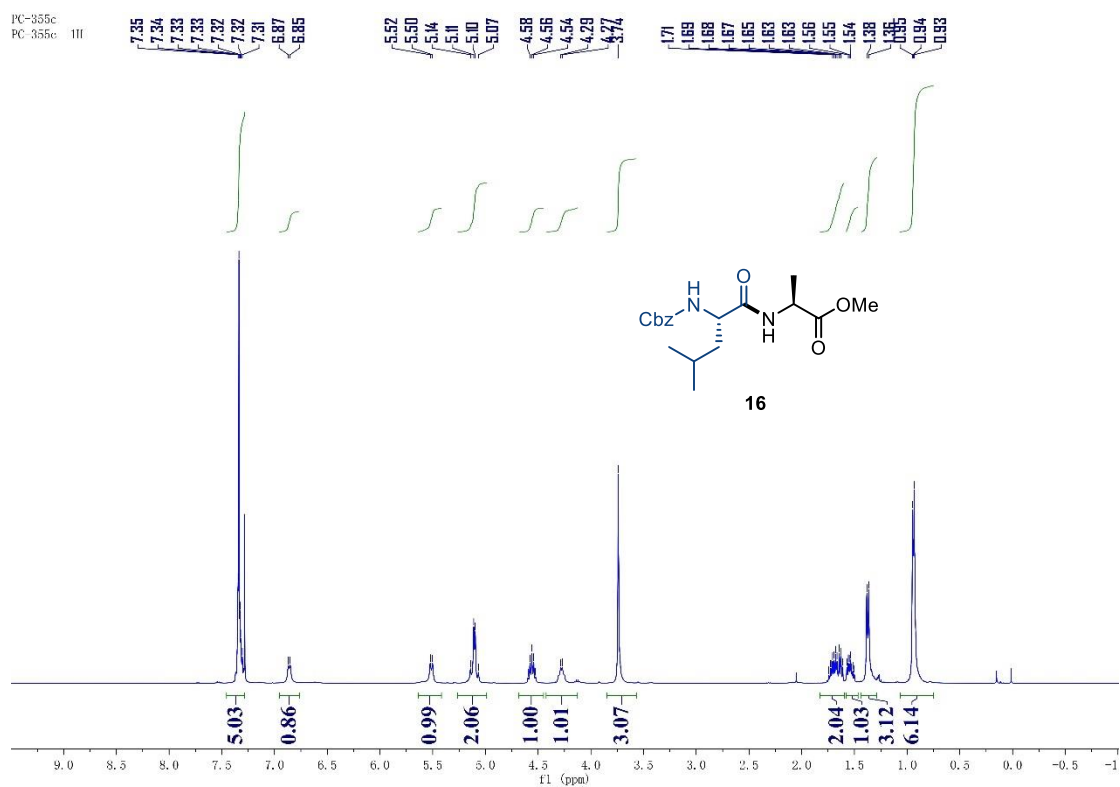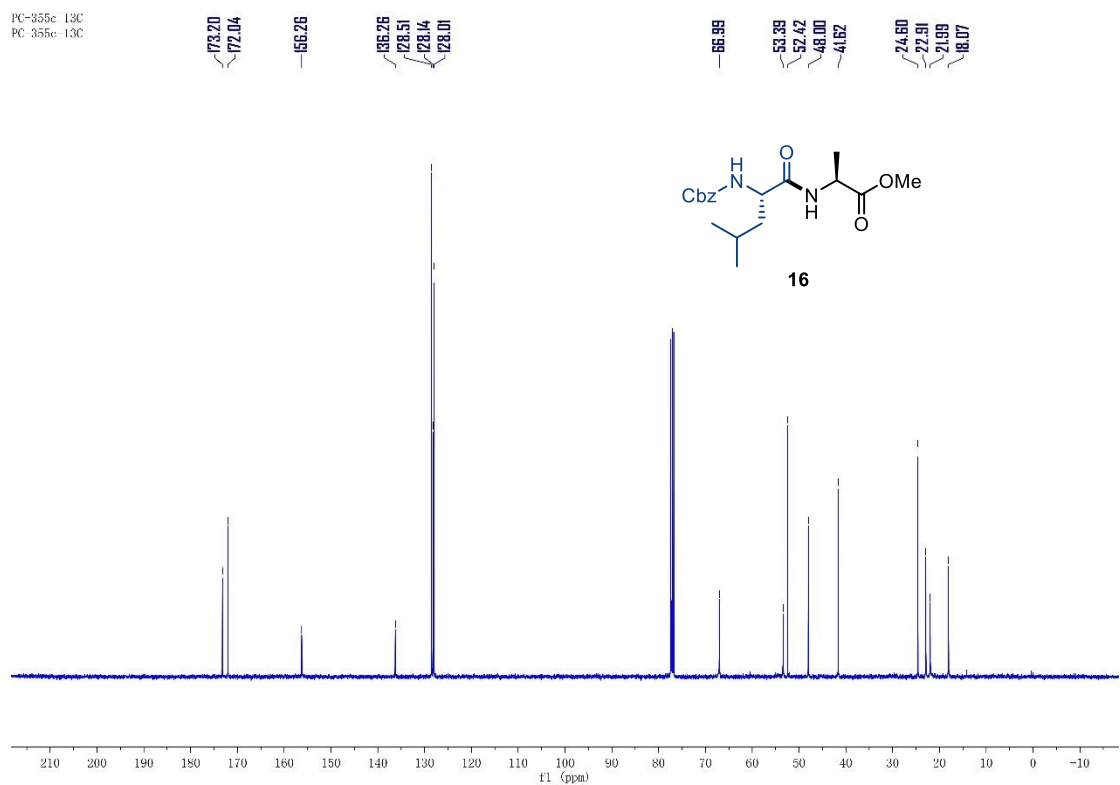

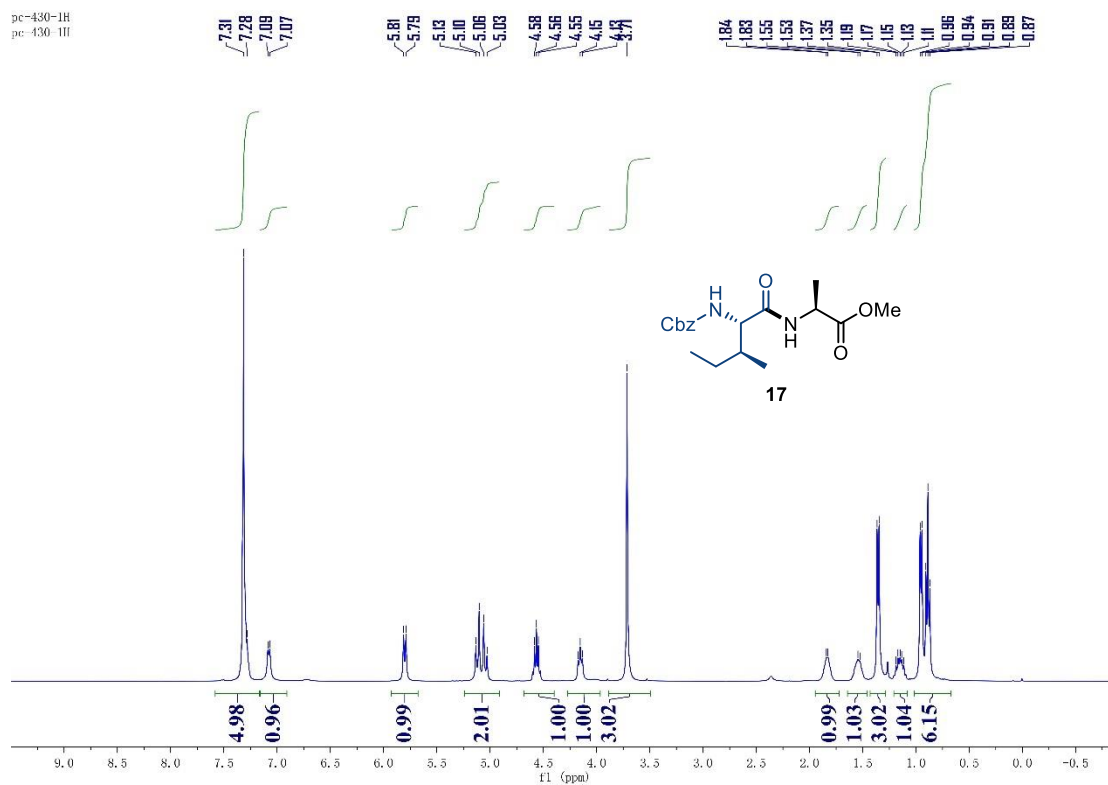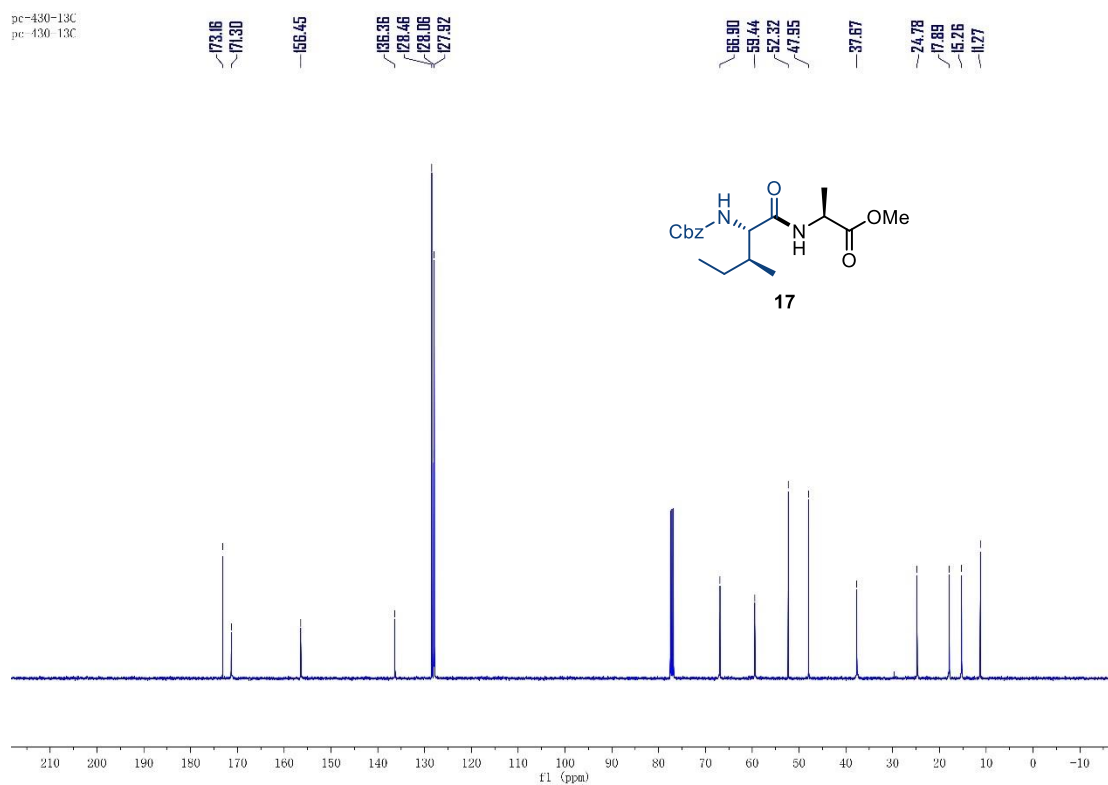

PC-360c  
PC-360c 1H

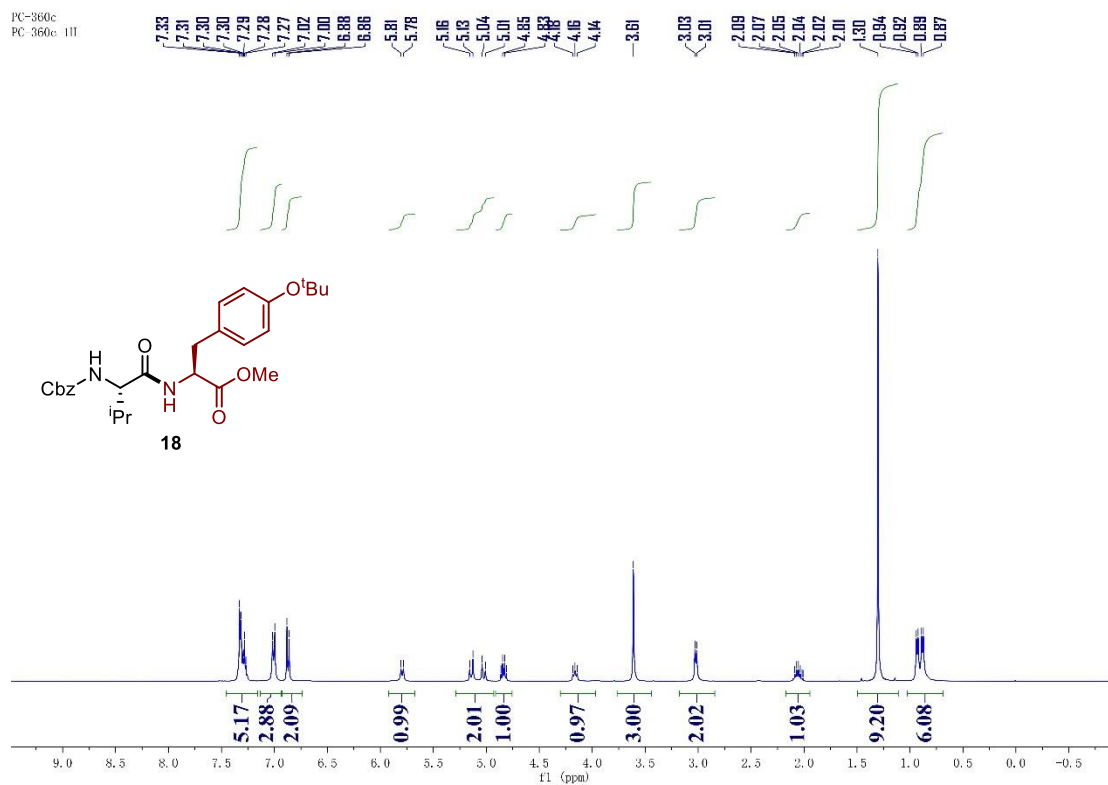

PC-360c  
PC-360c 13C

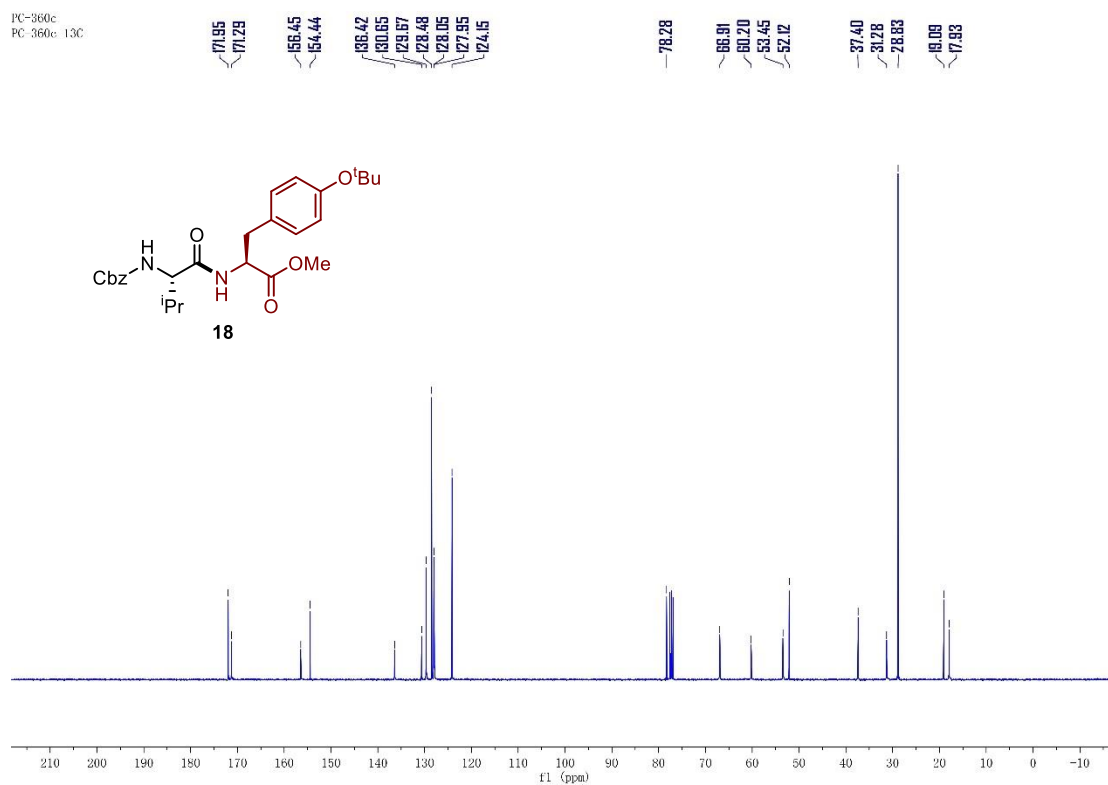

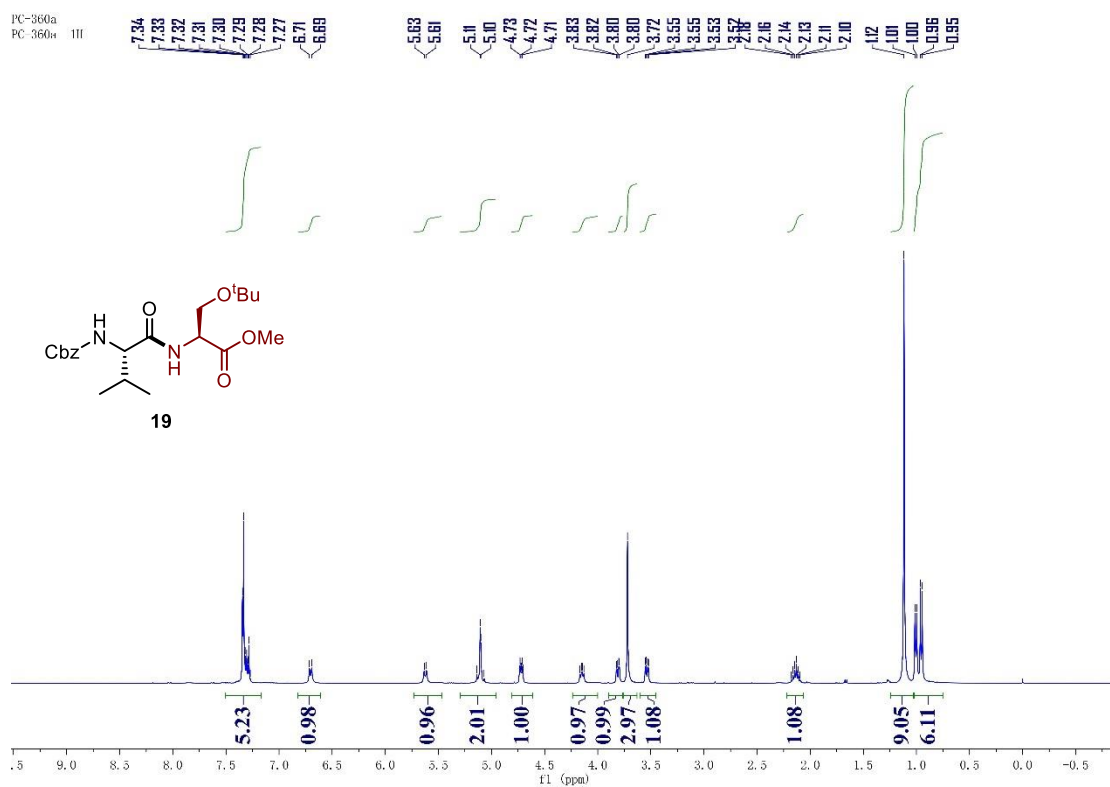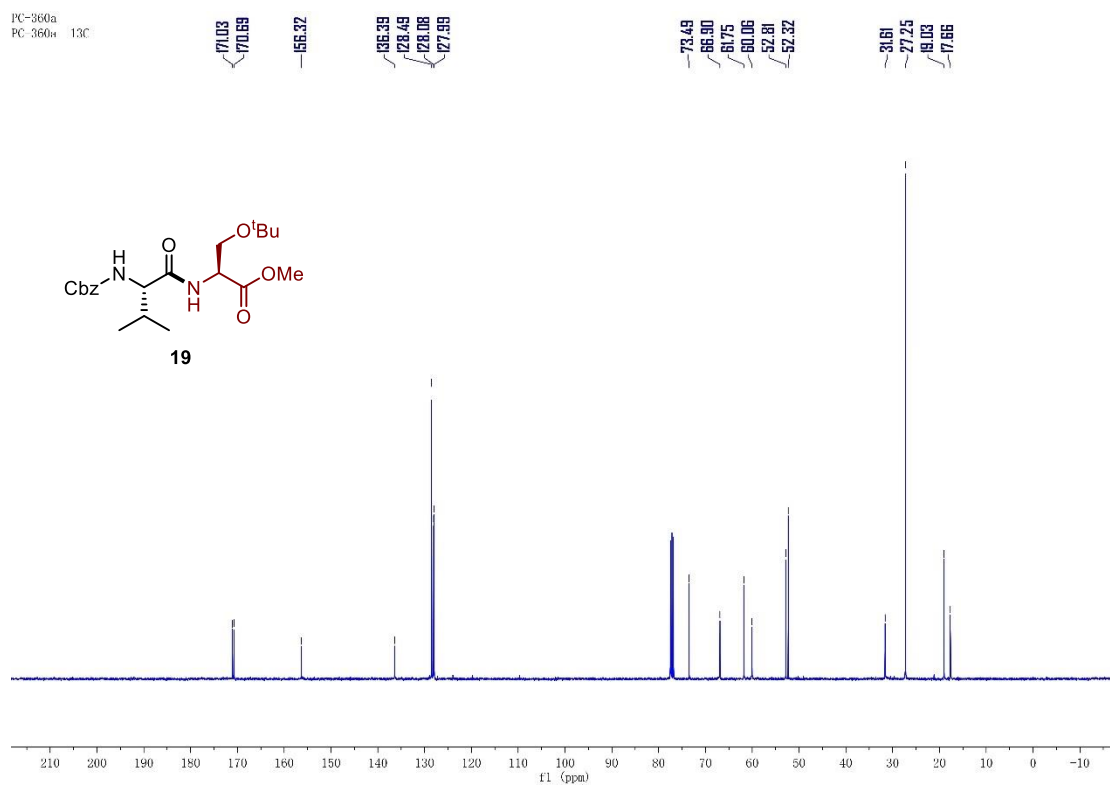

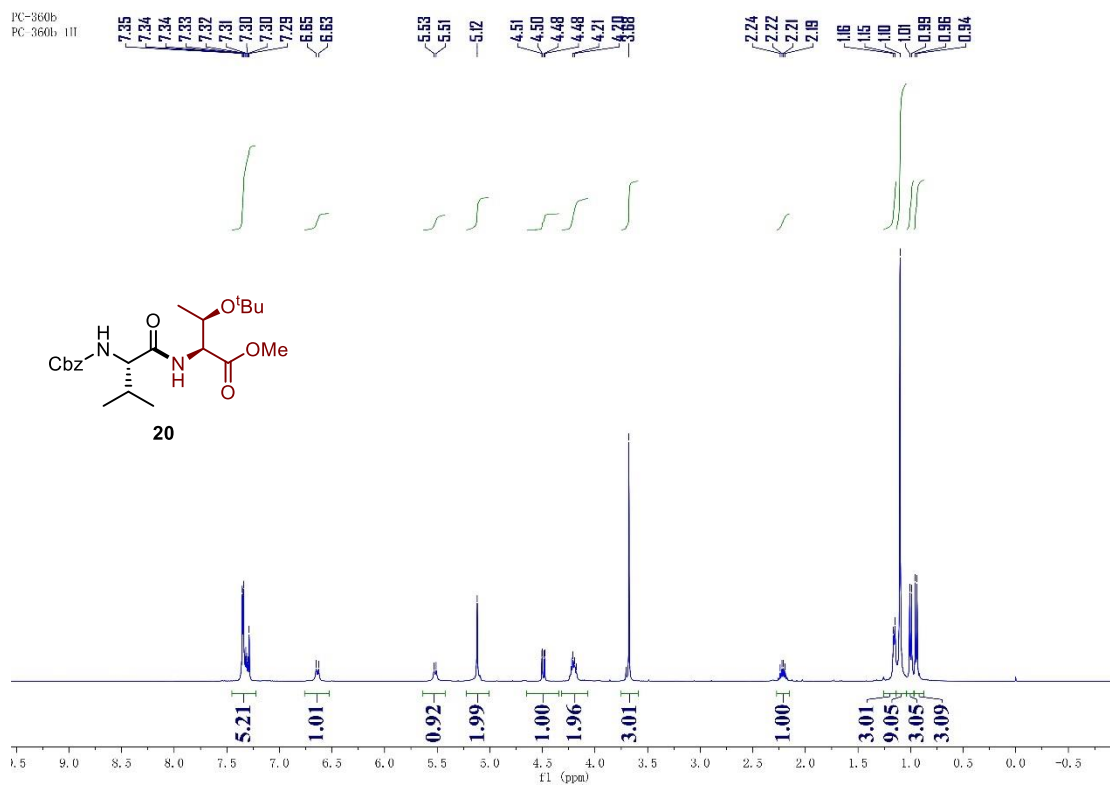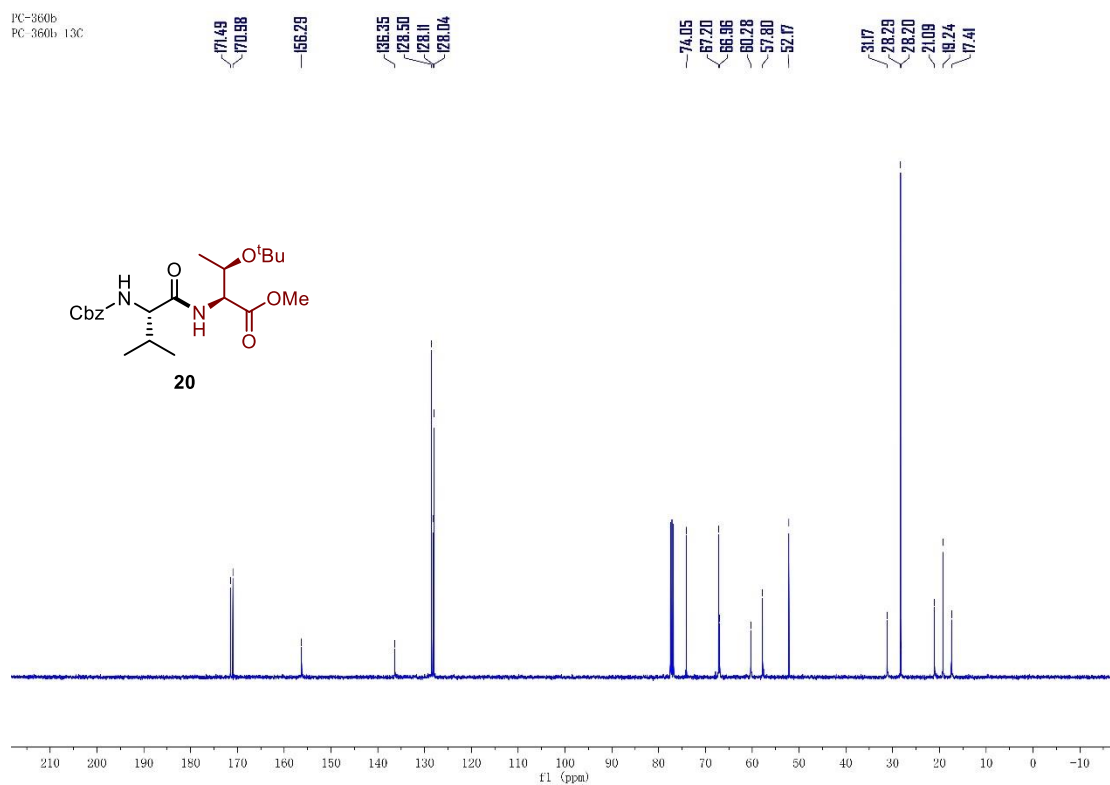

PC-363c  
PC-363c 1H

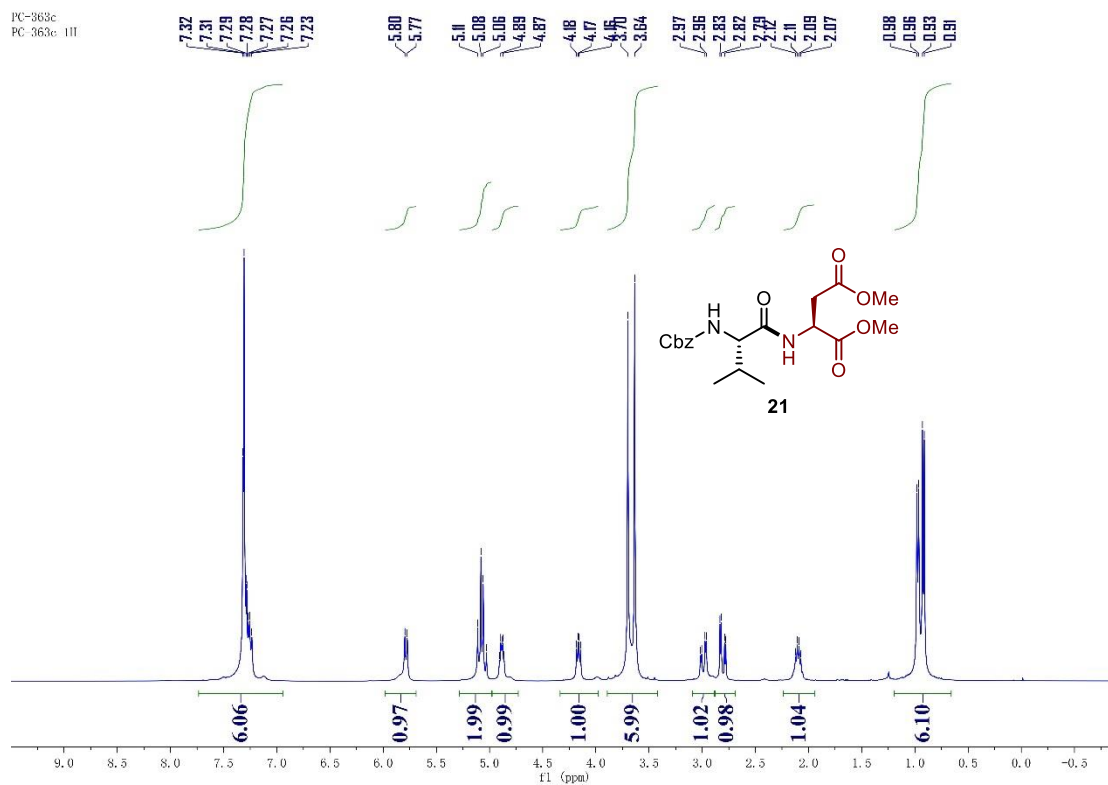

PC-363c  
363c

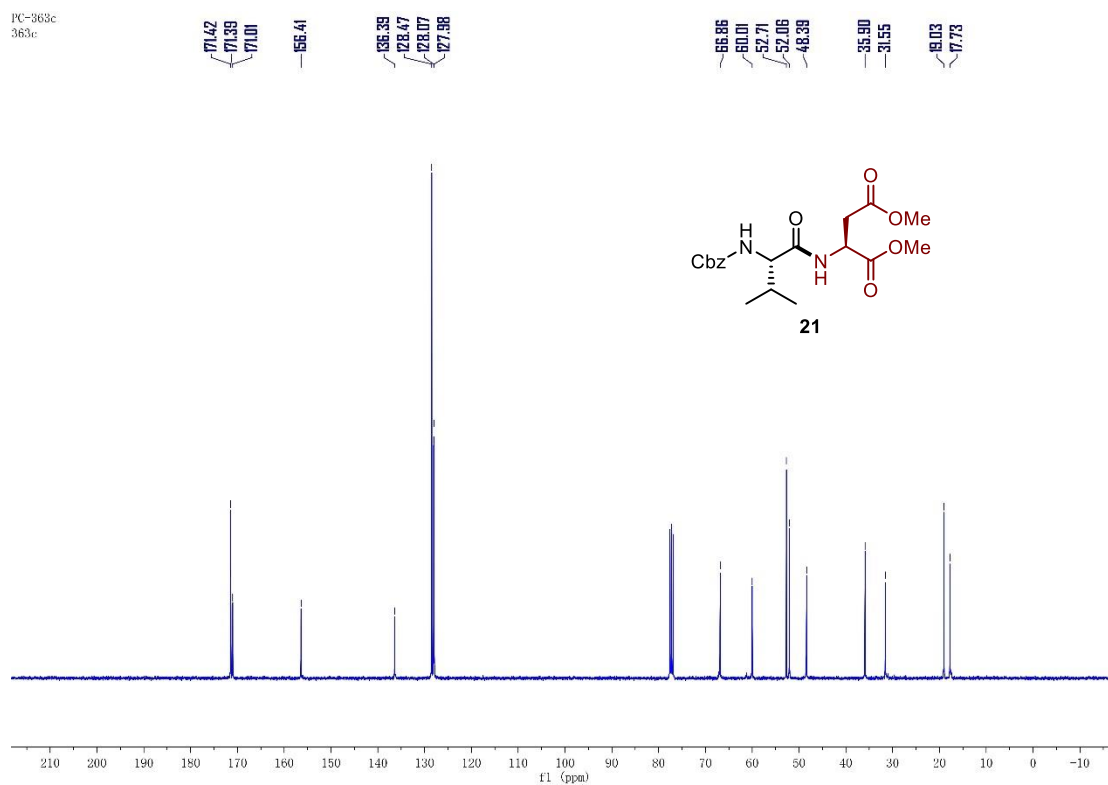

PC-363d  
PC-363d 1H

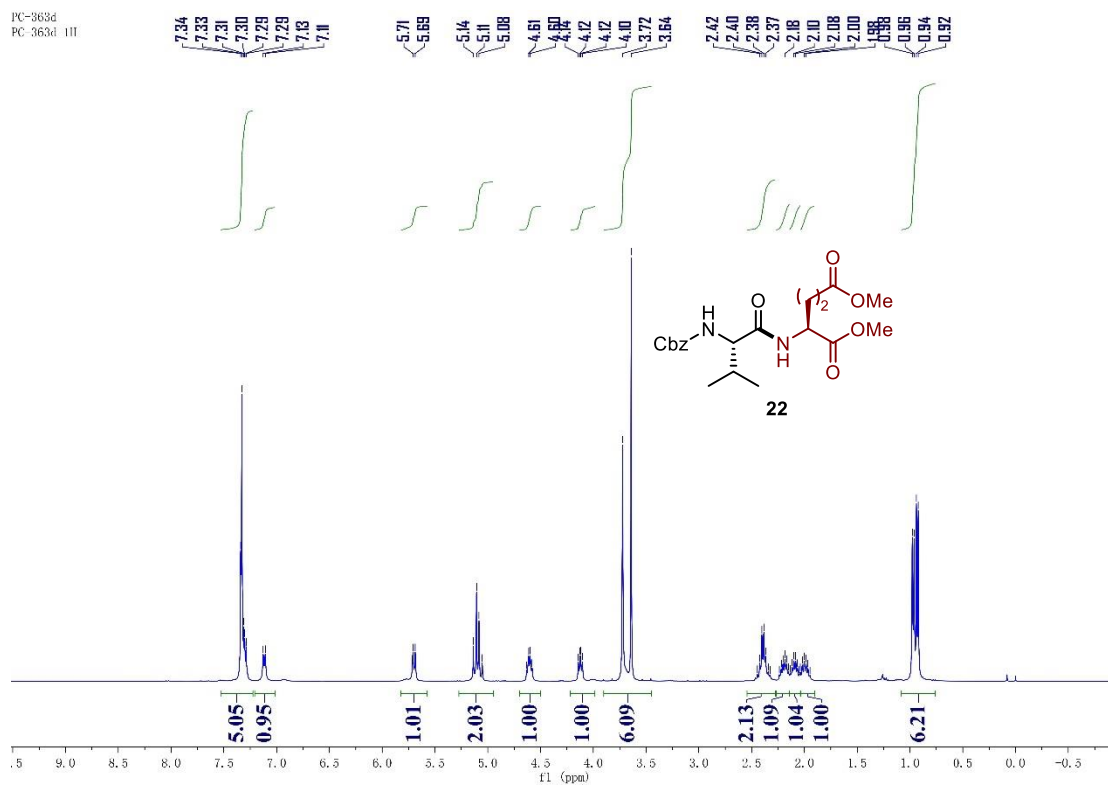

PC-363d  
PC-363d 13C

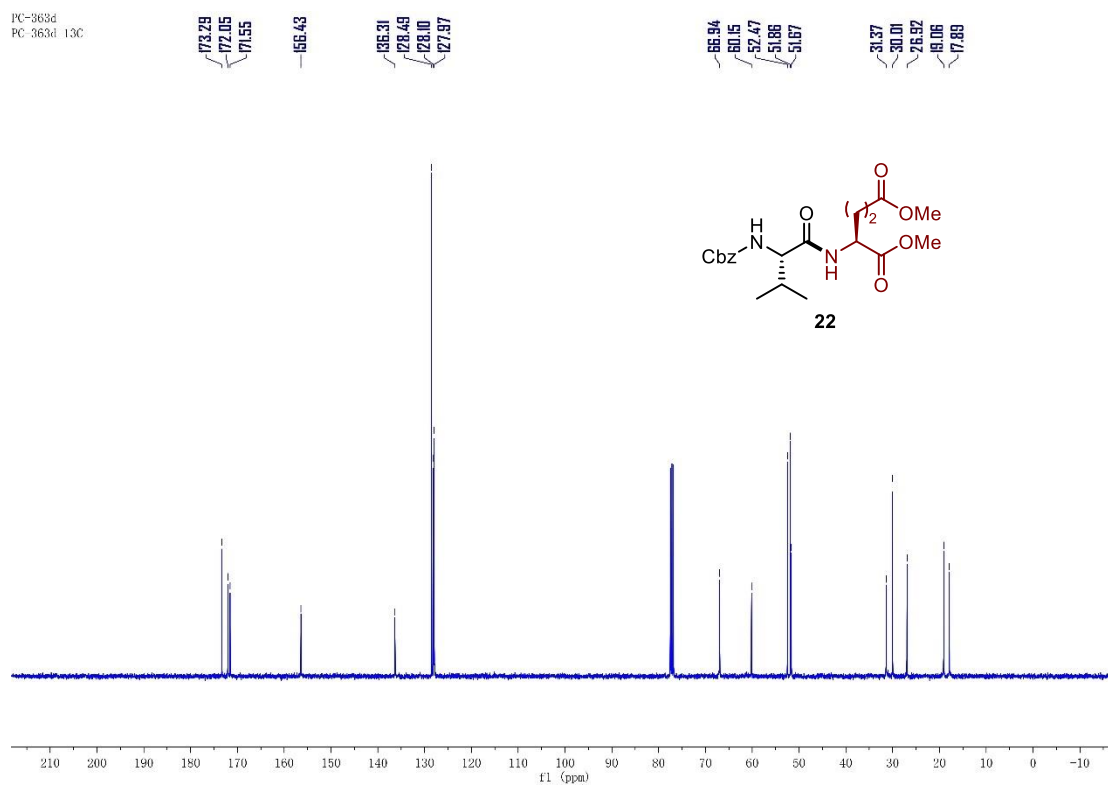

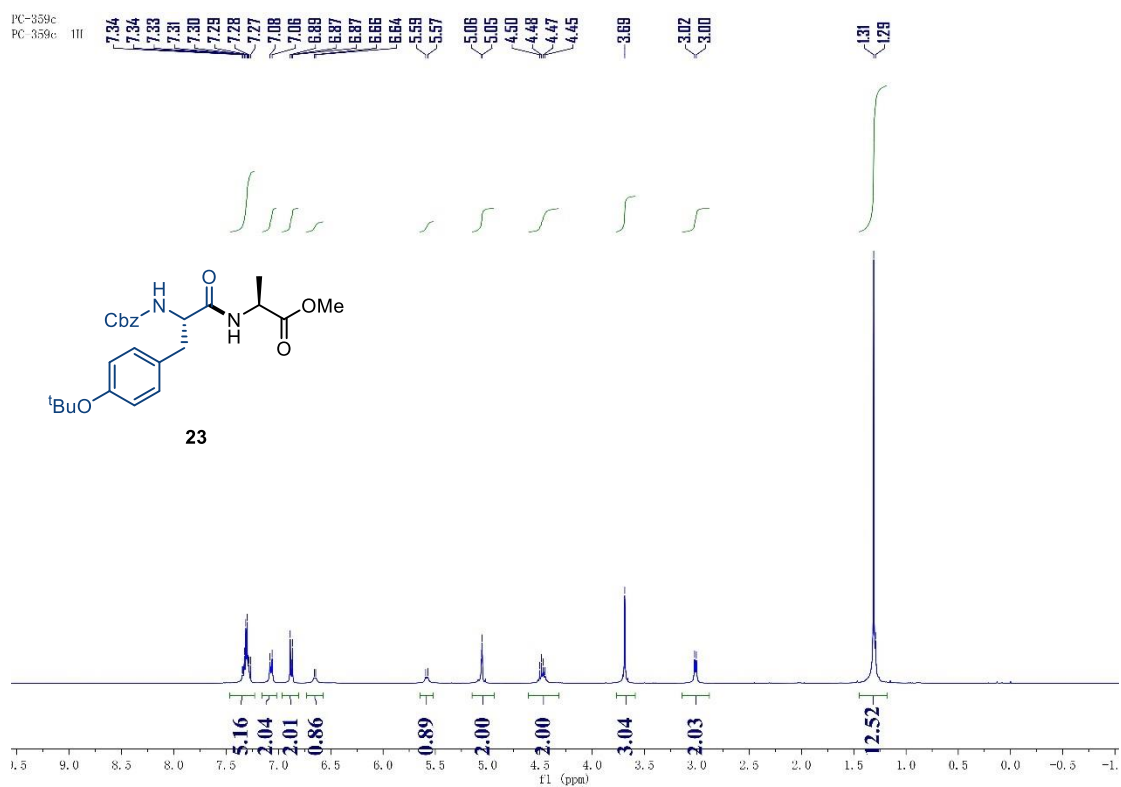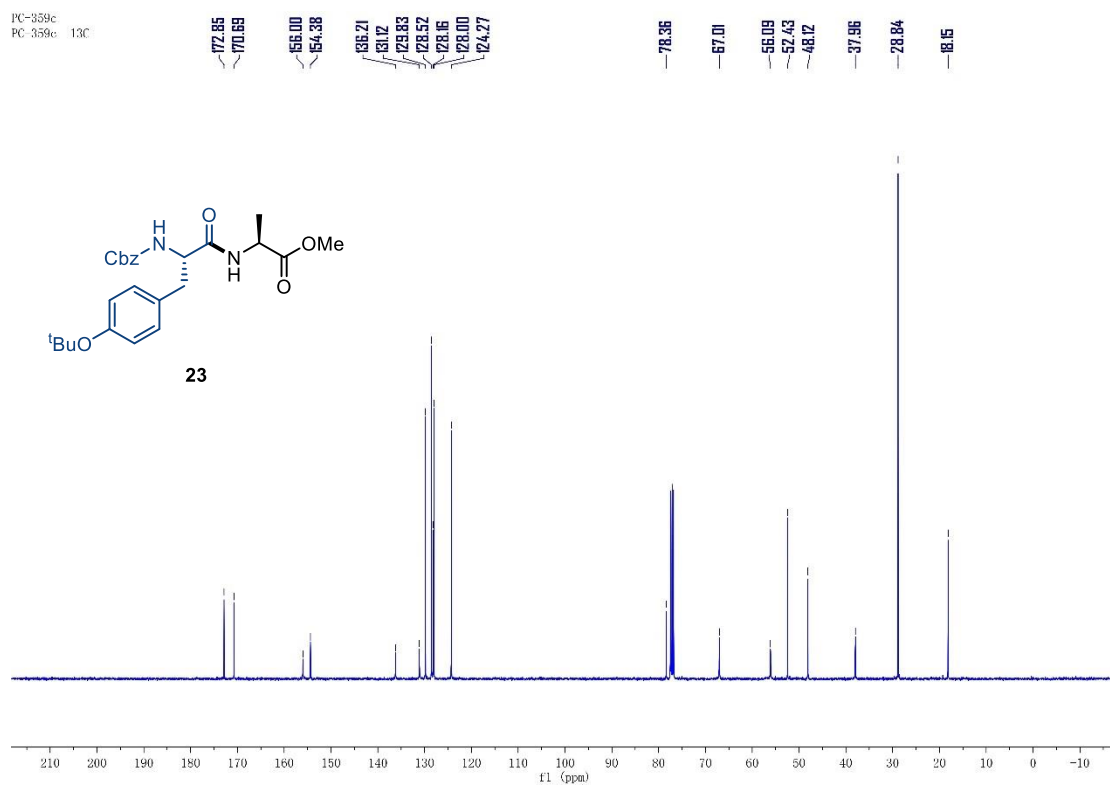

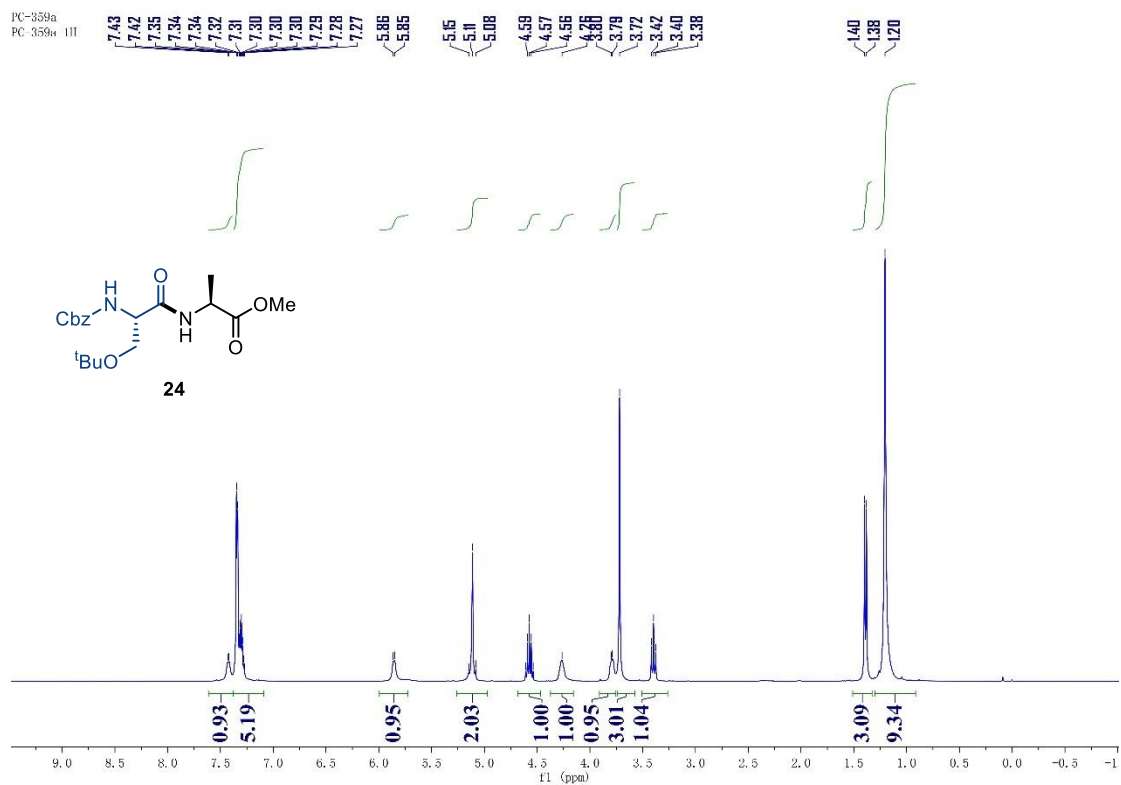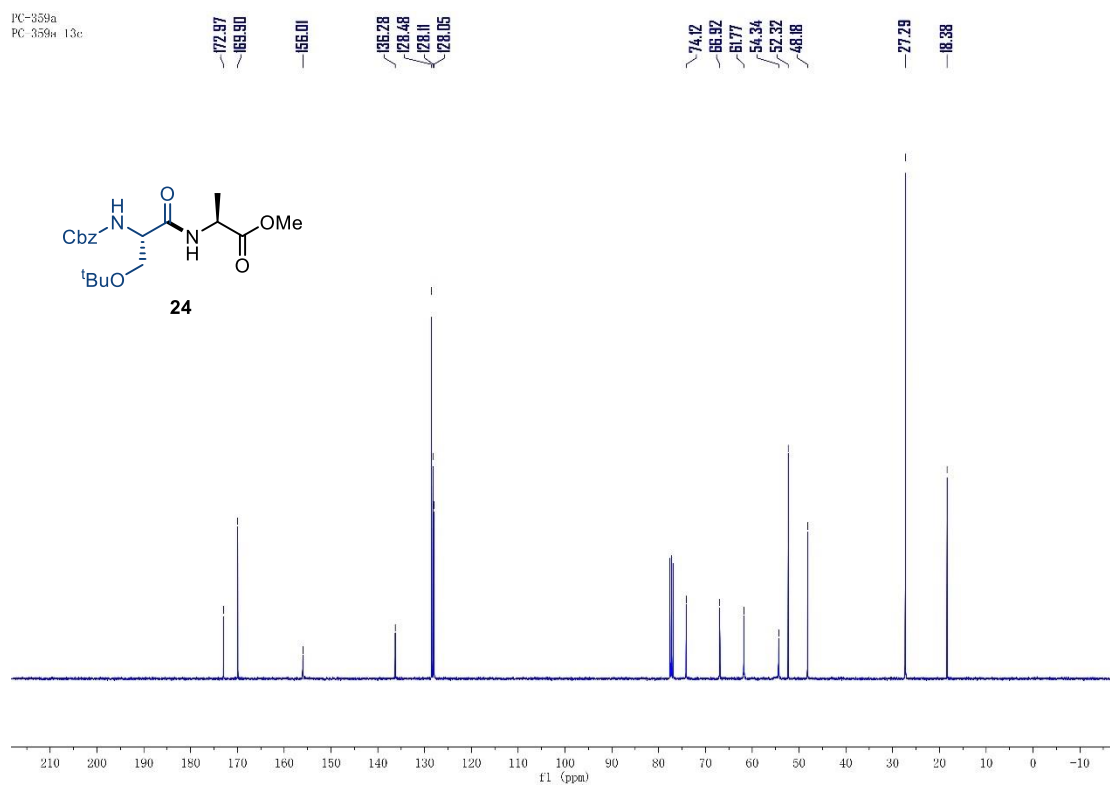

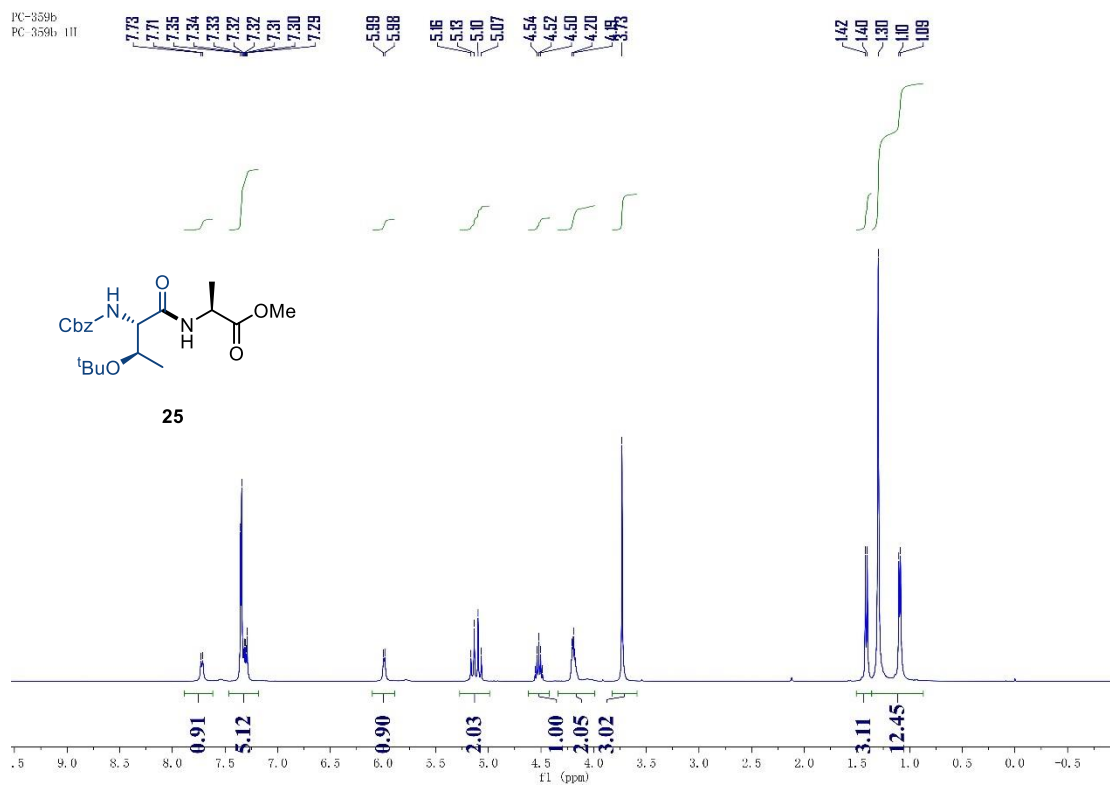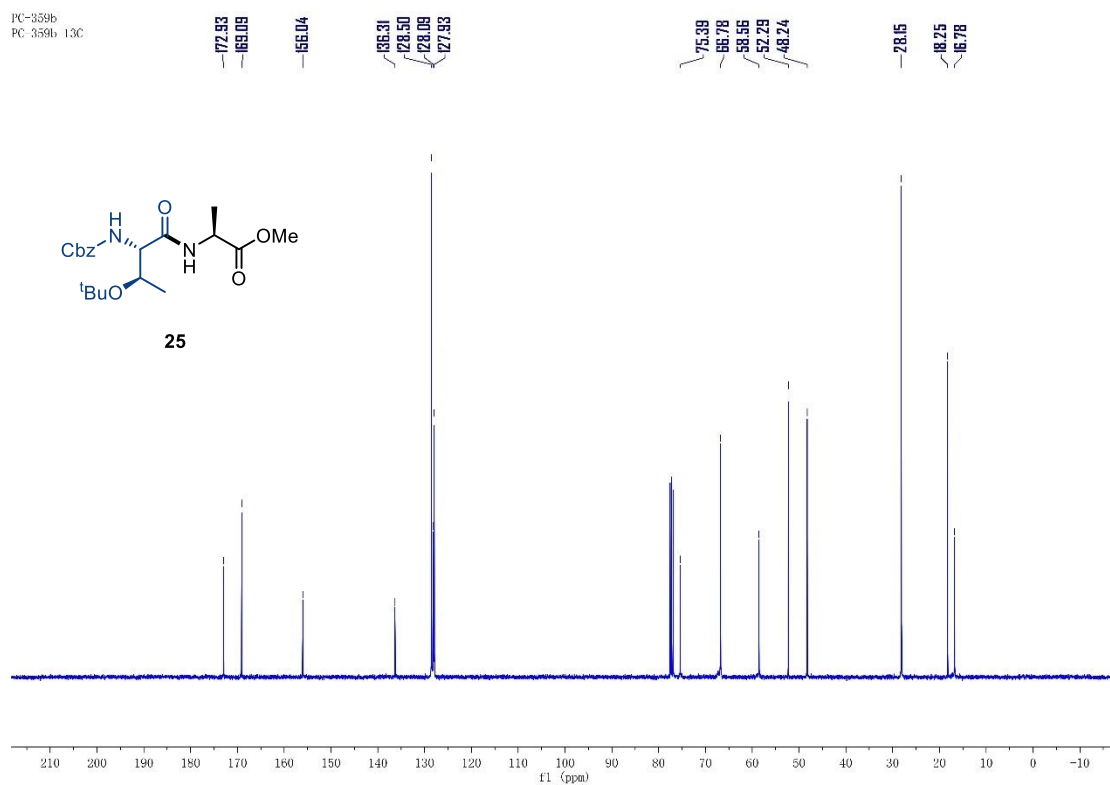

PC-363a  
PC-363a 1H

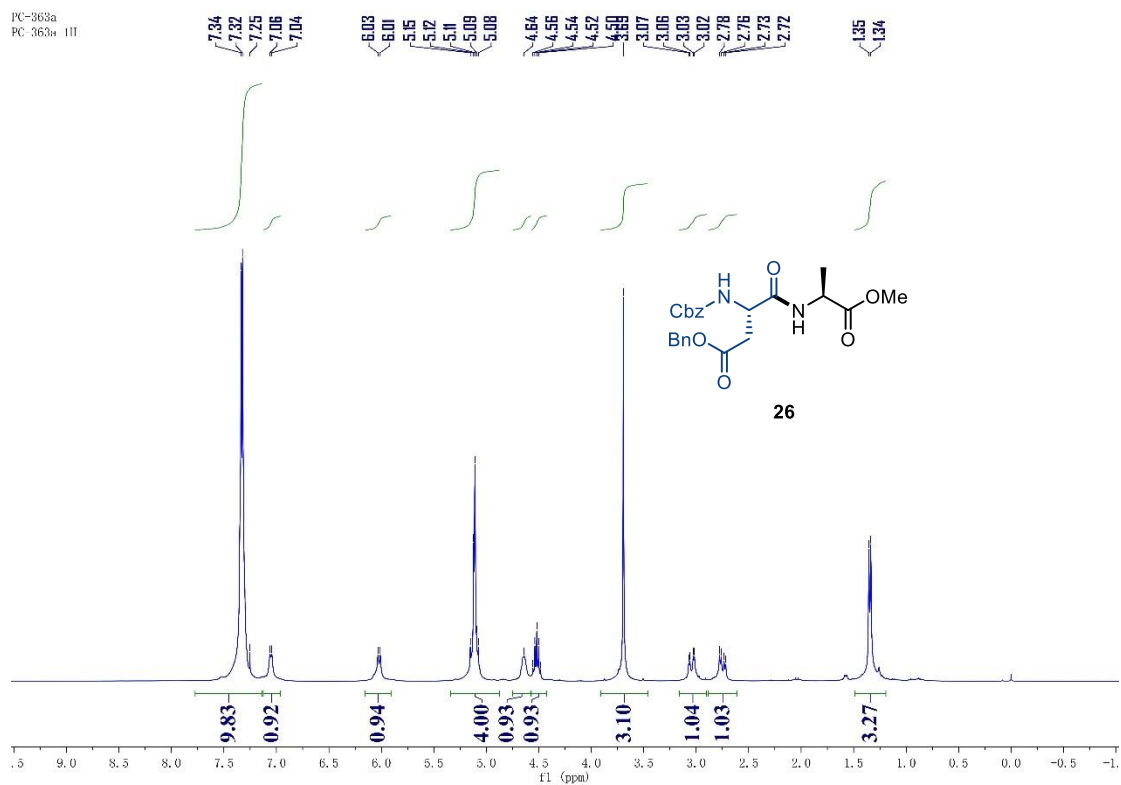

PC-363a  
PC-363a 13C

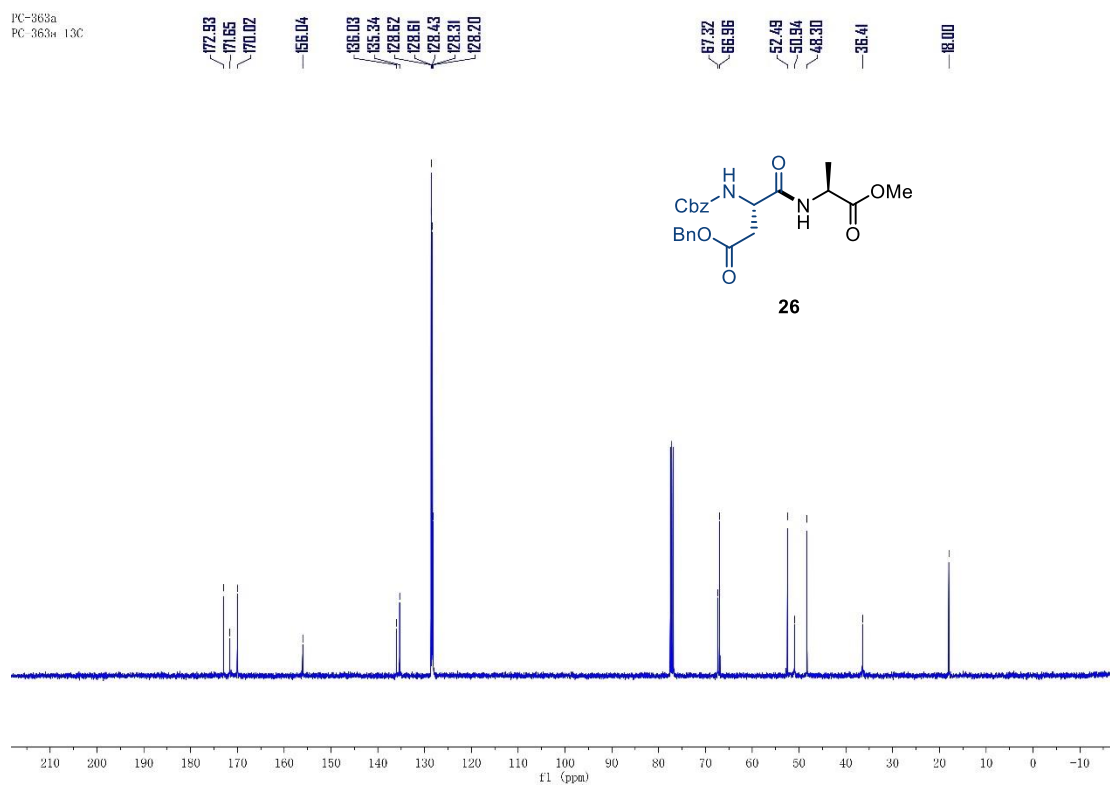

PC-363b  
PC-363b: 1H

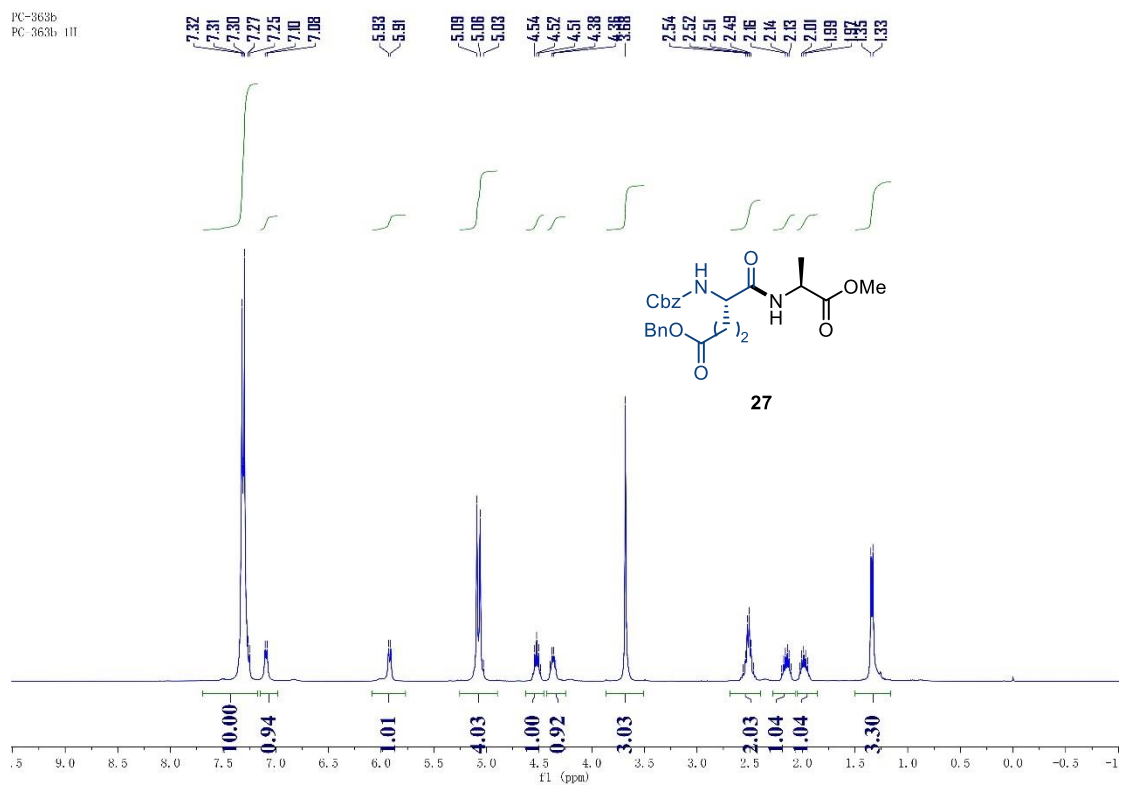

PC-363b  
PC-363b: 13C

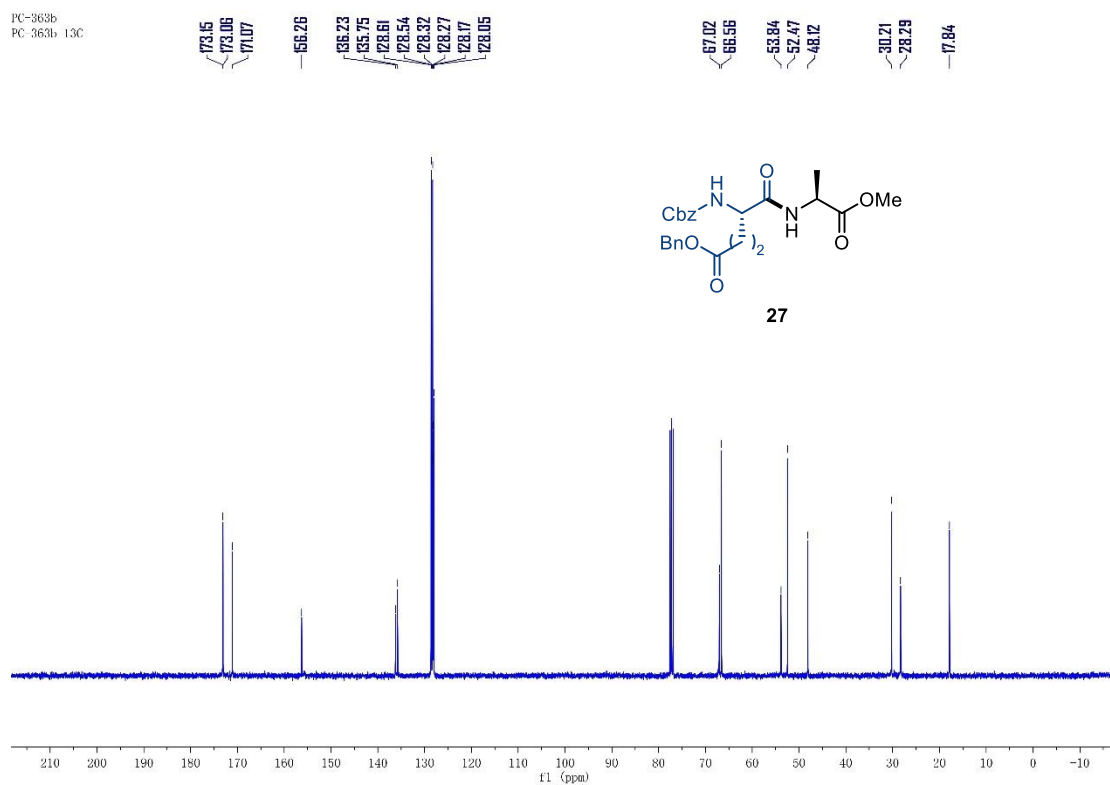

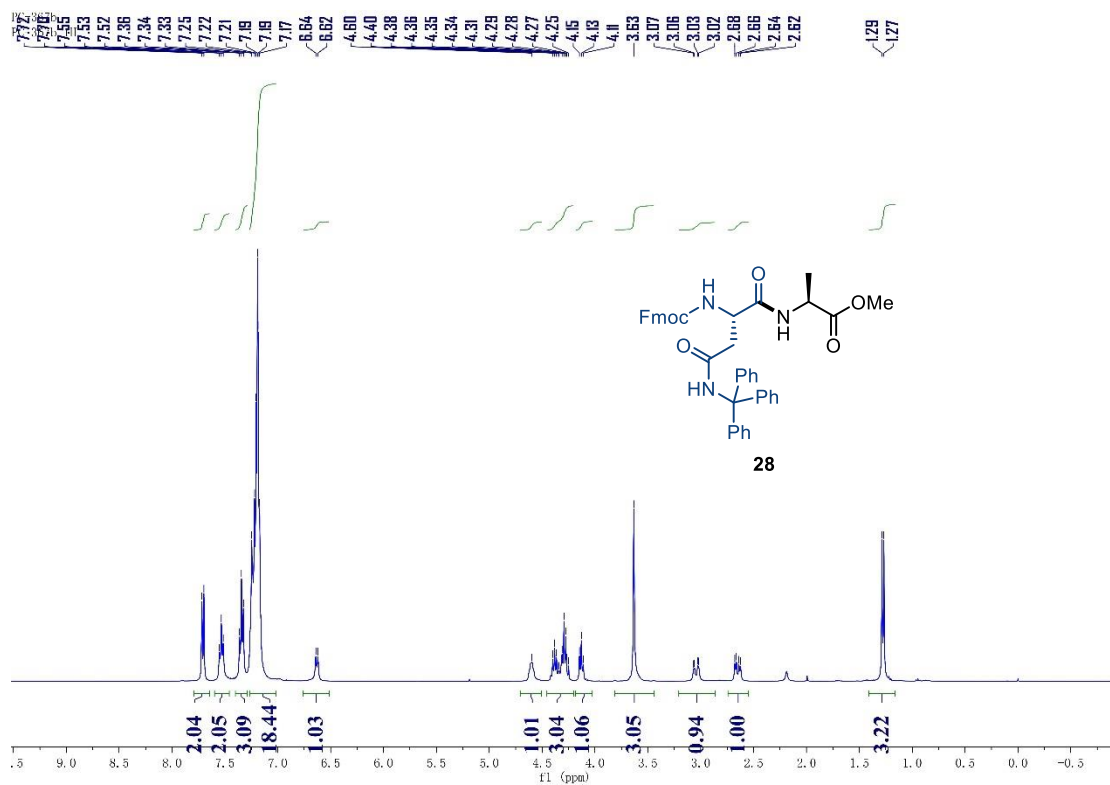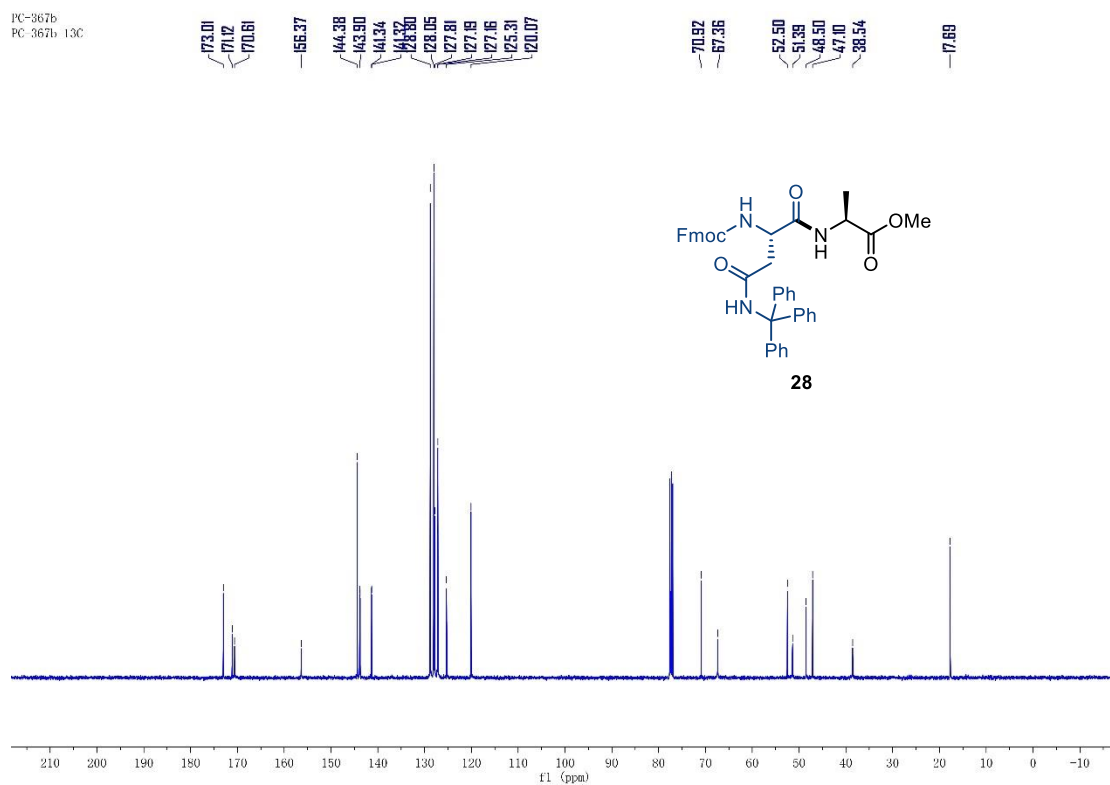

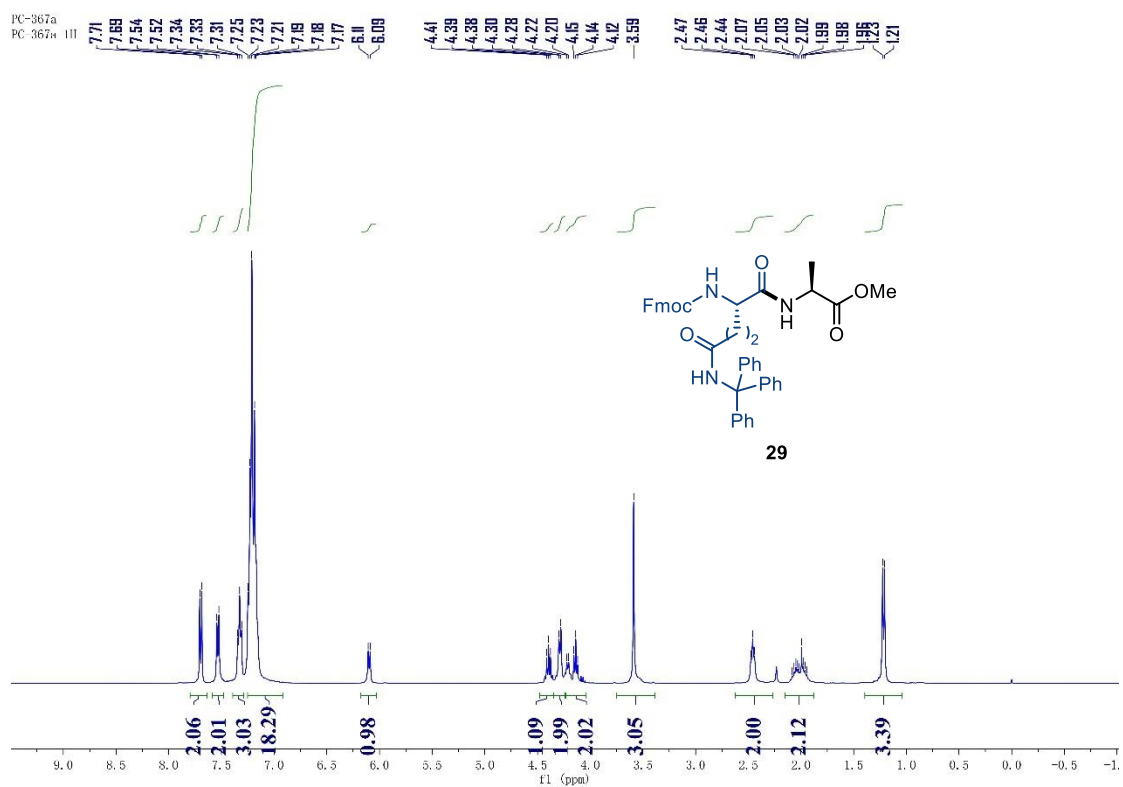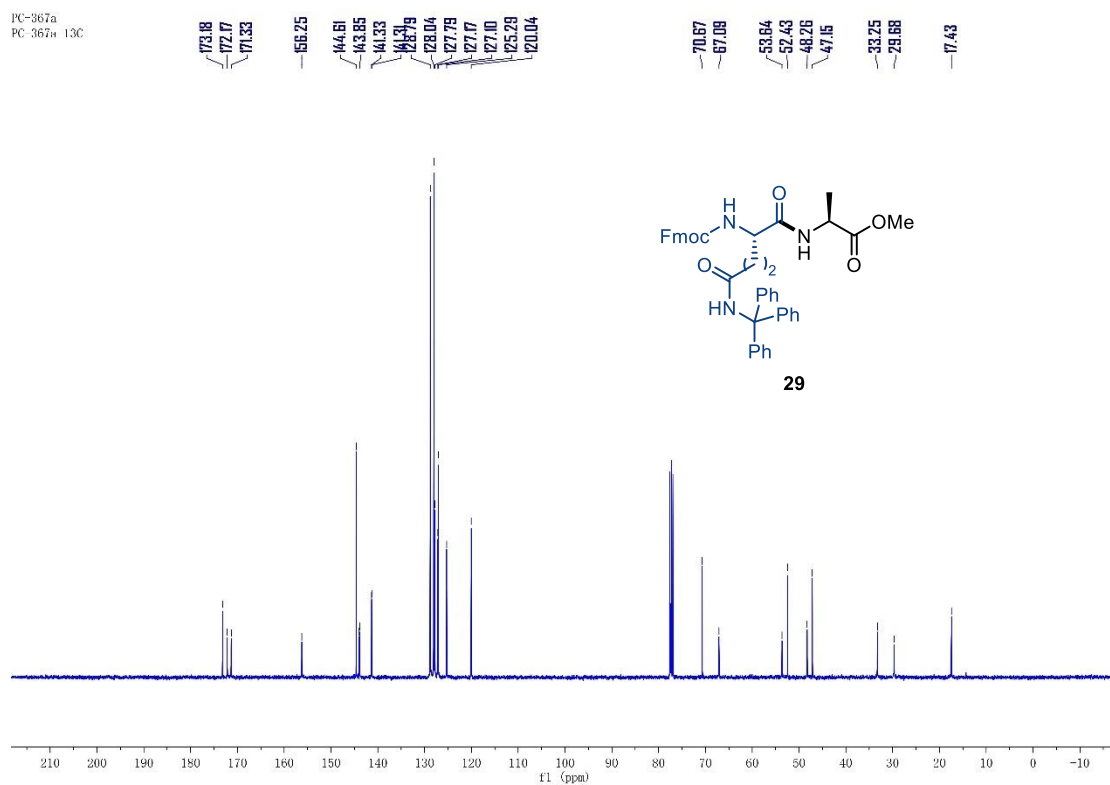

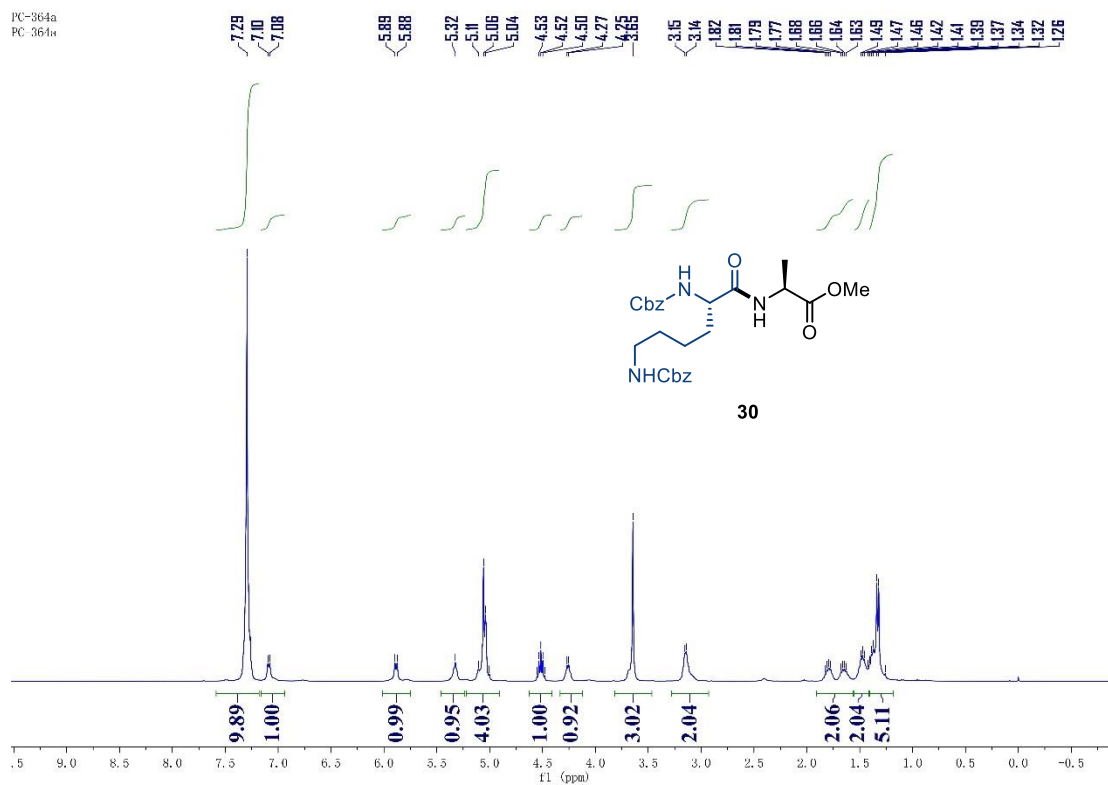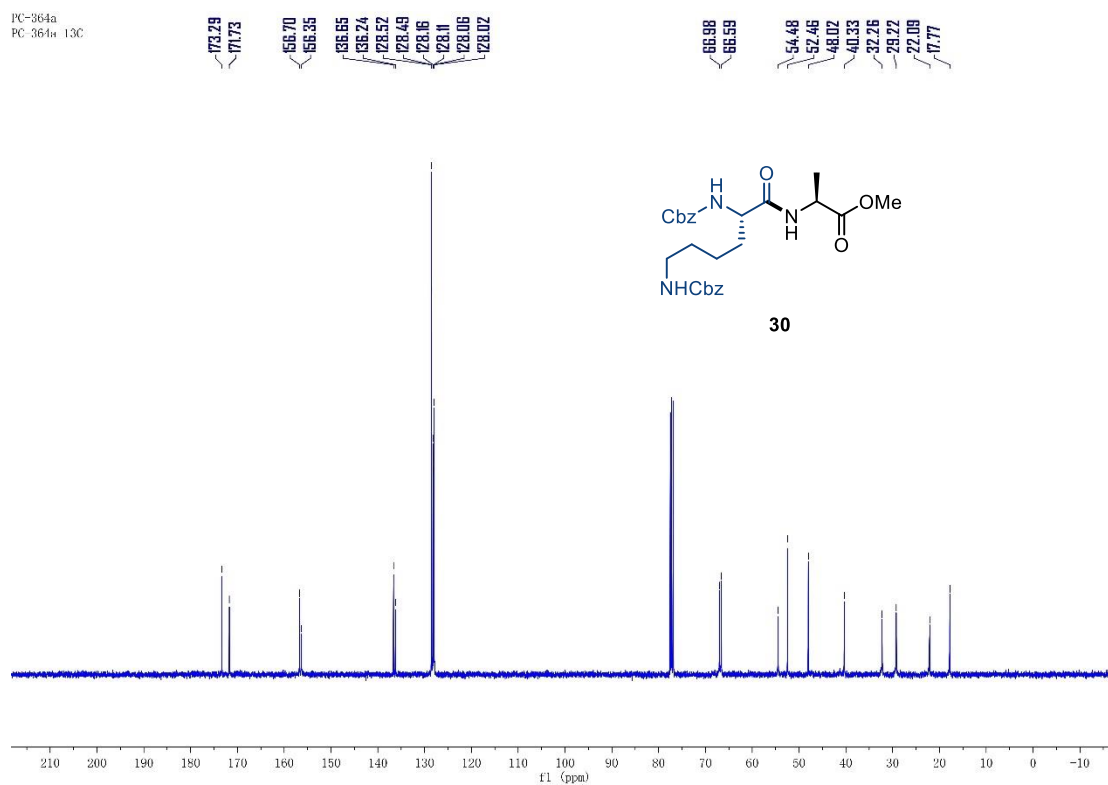

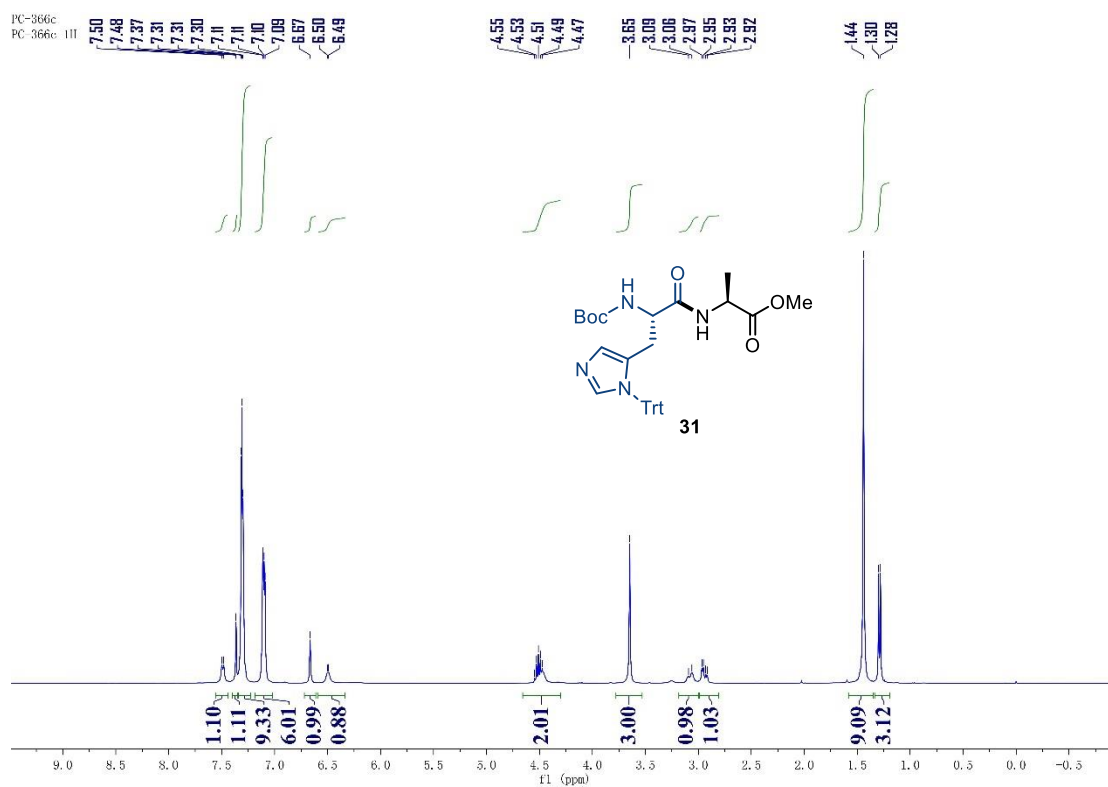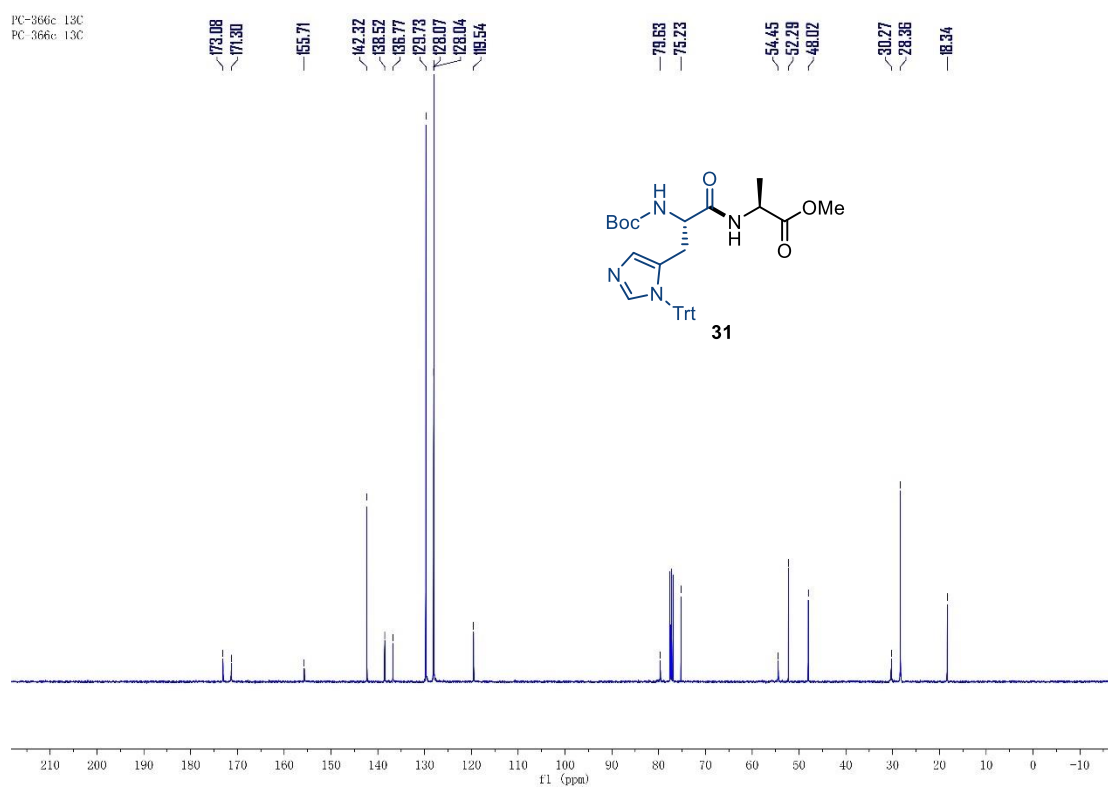

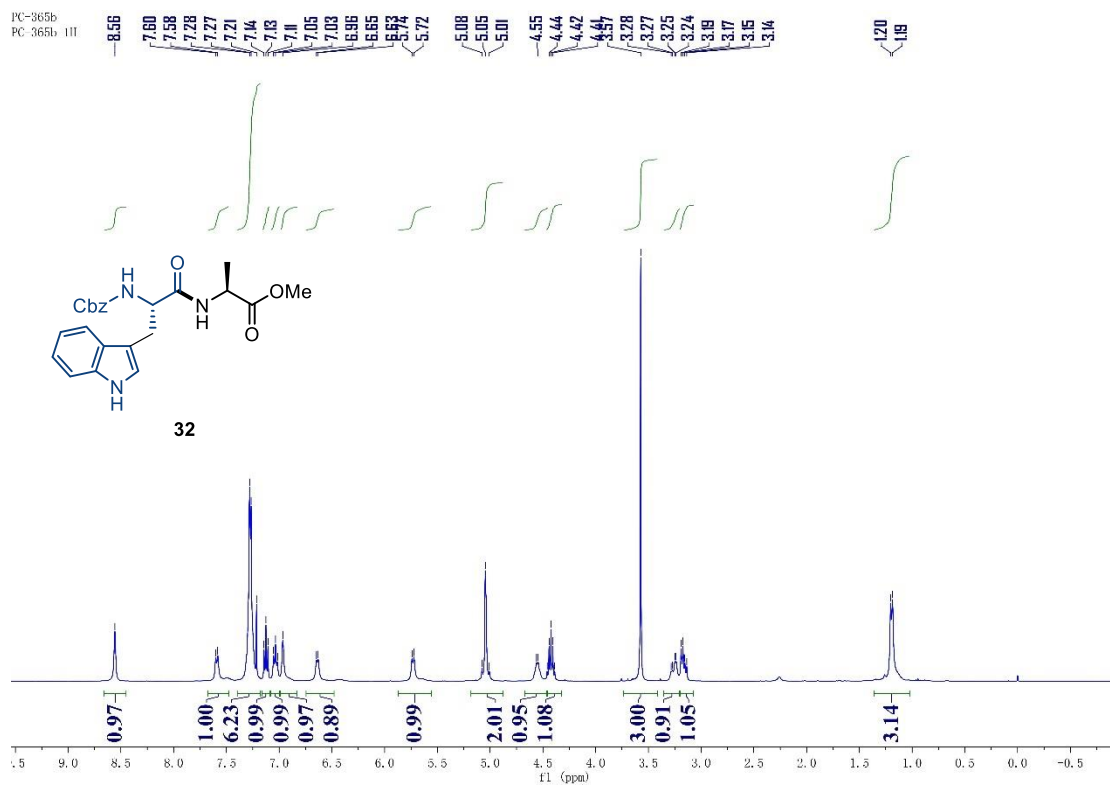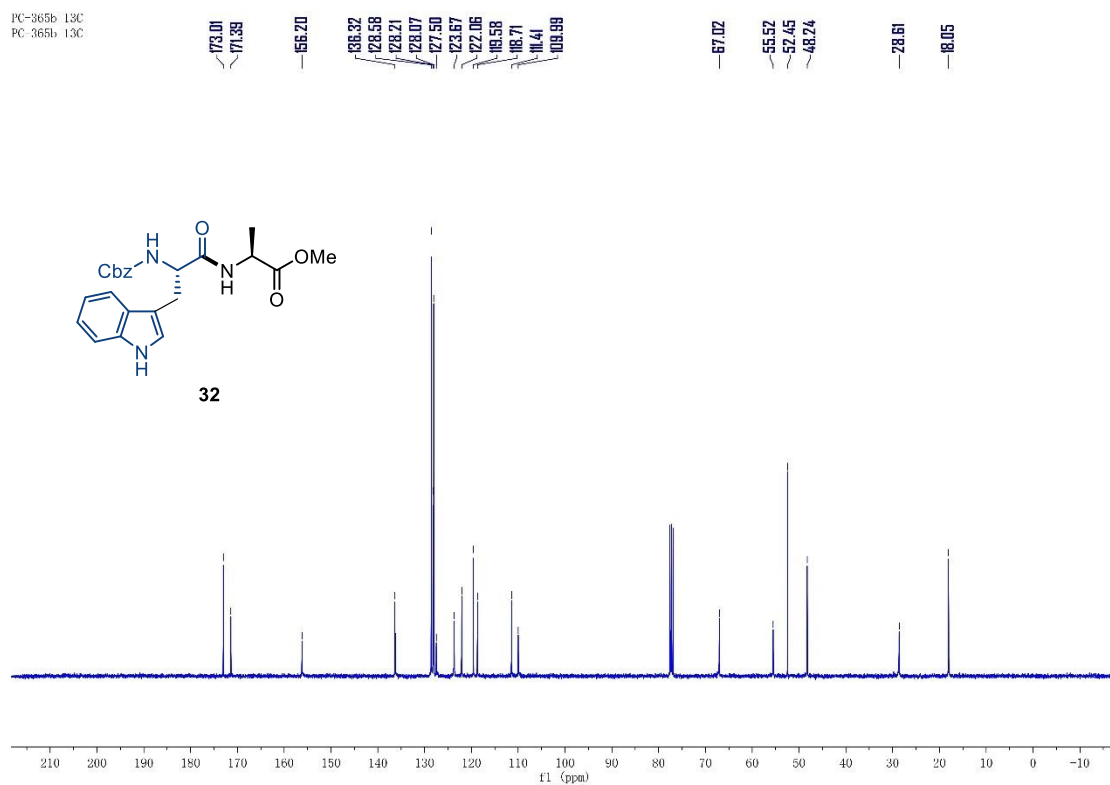

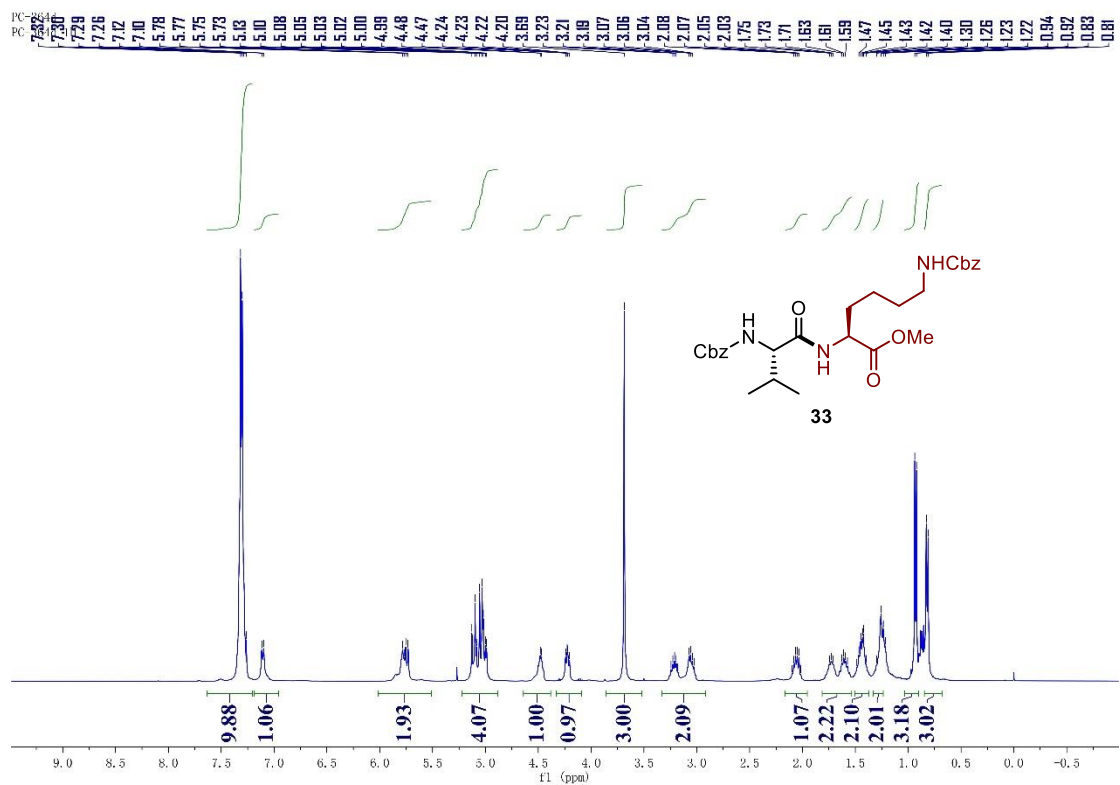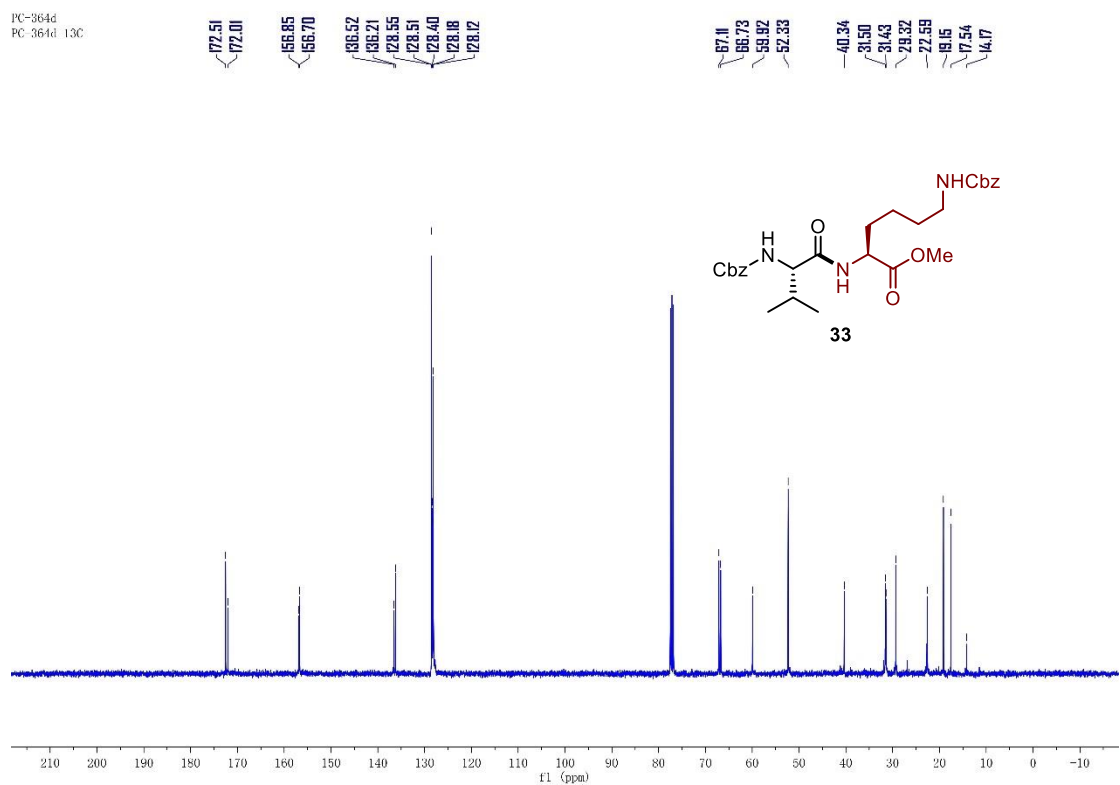

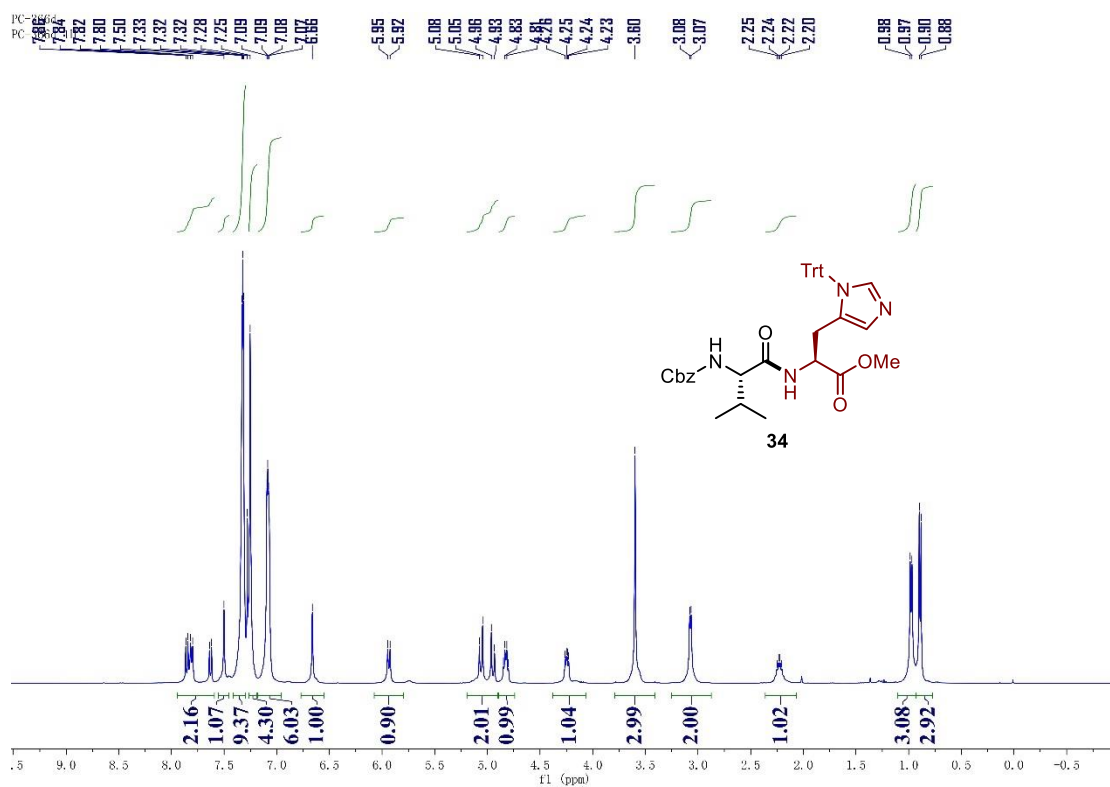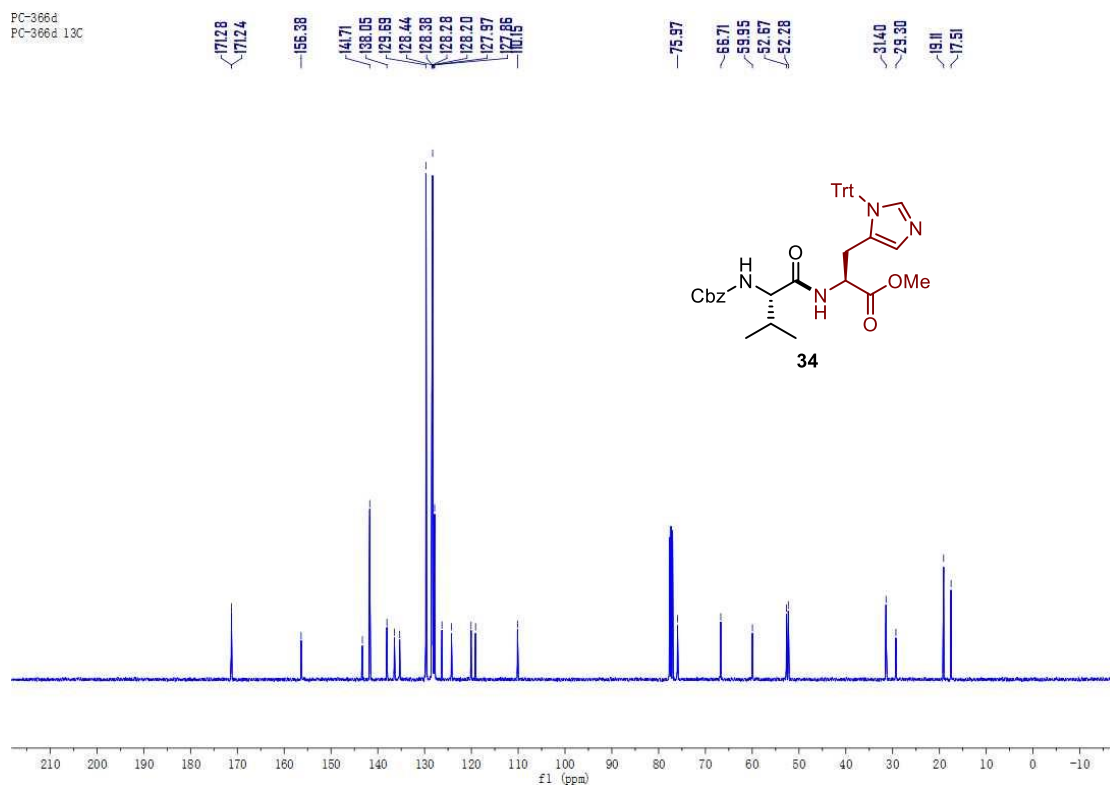

PC-365d  
PC-365d 1H

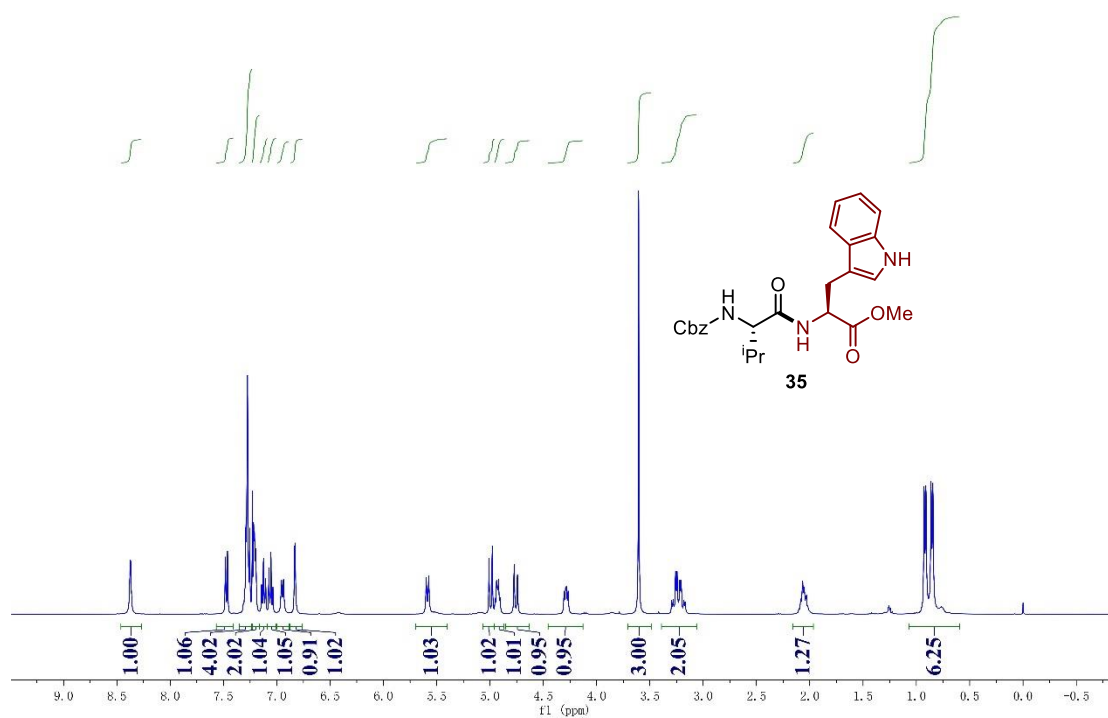

PC-365d 13C  
PC-365d 13C

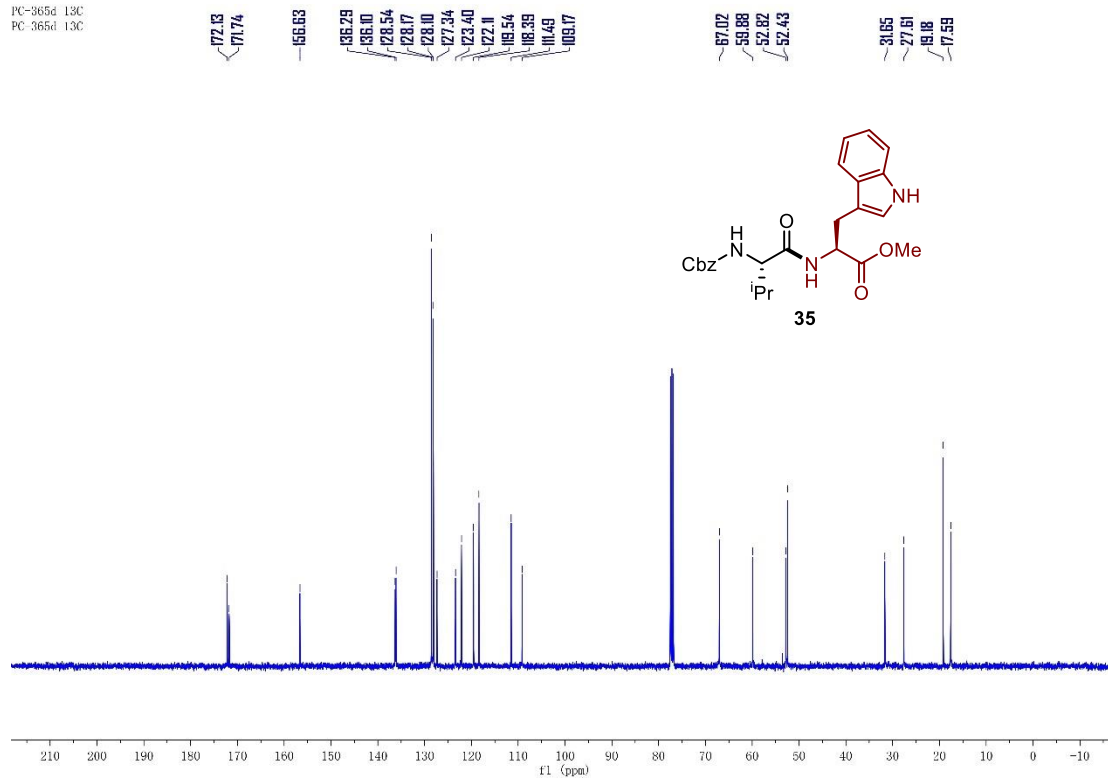

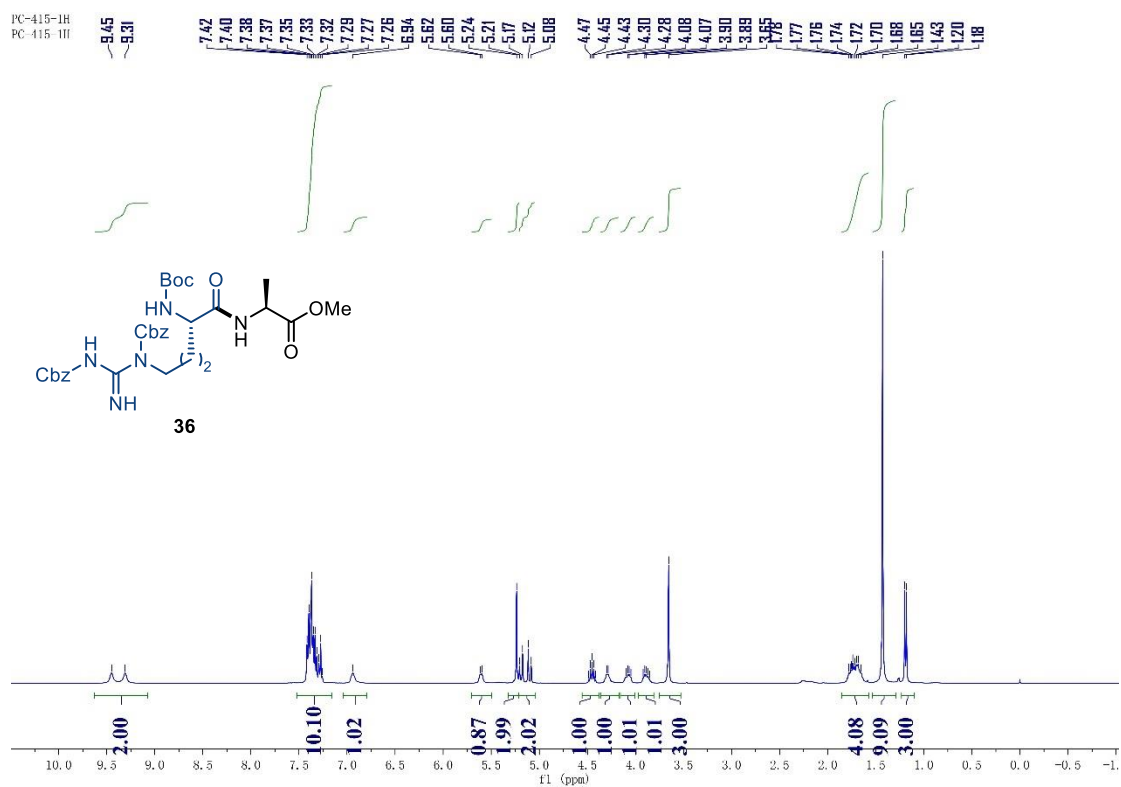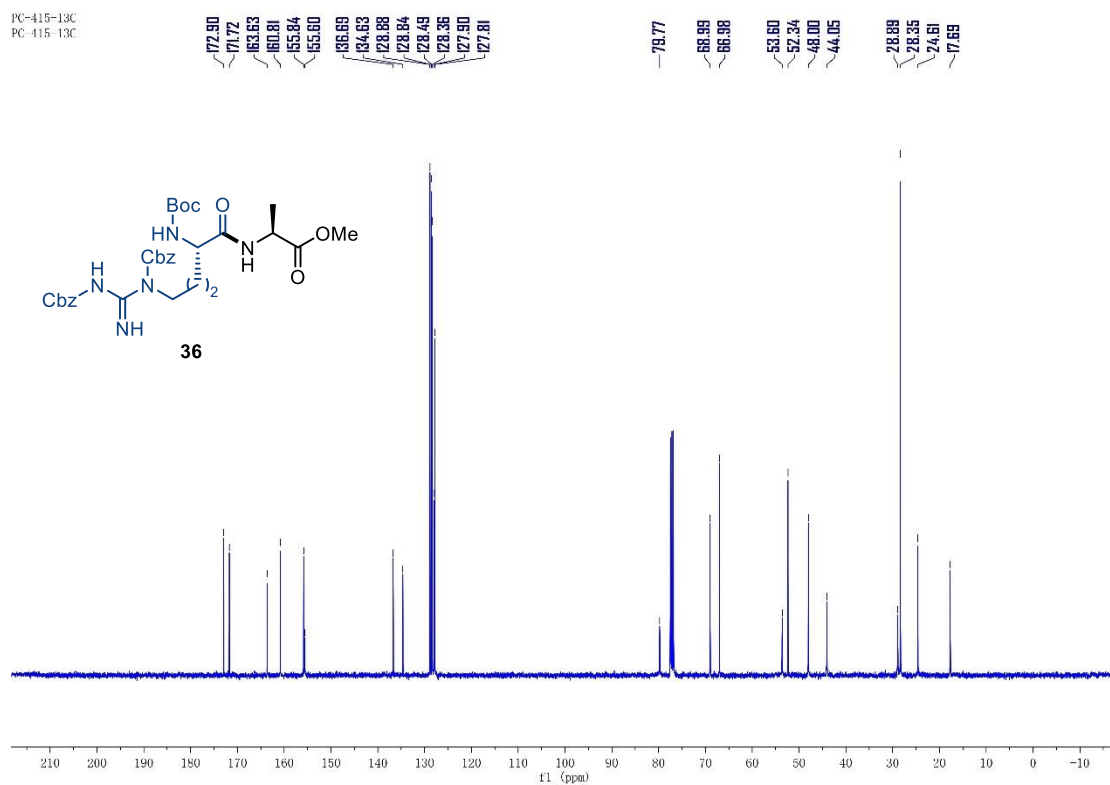

PC-361a  
PC-361a

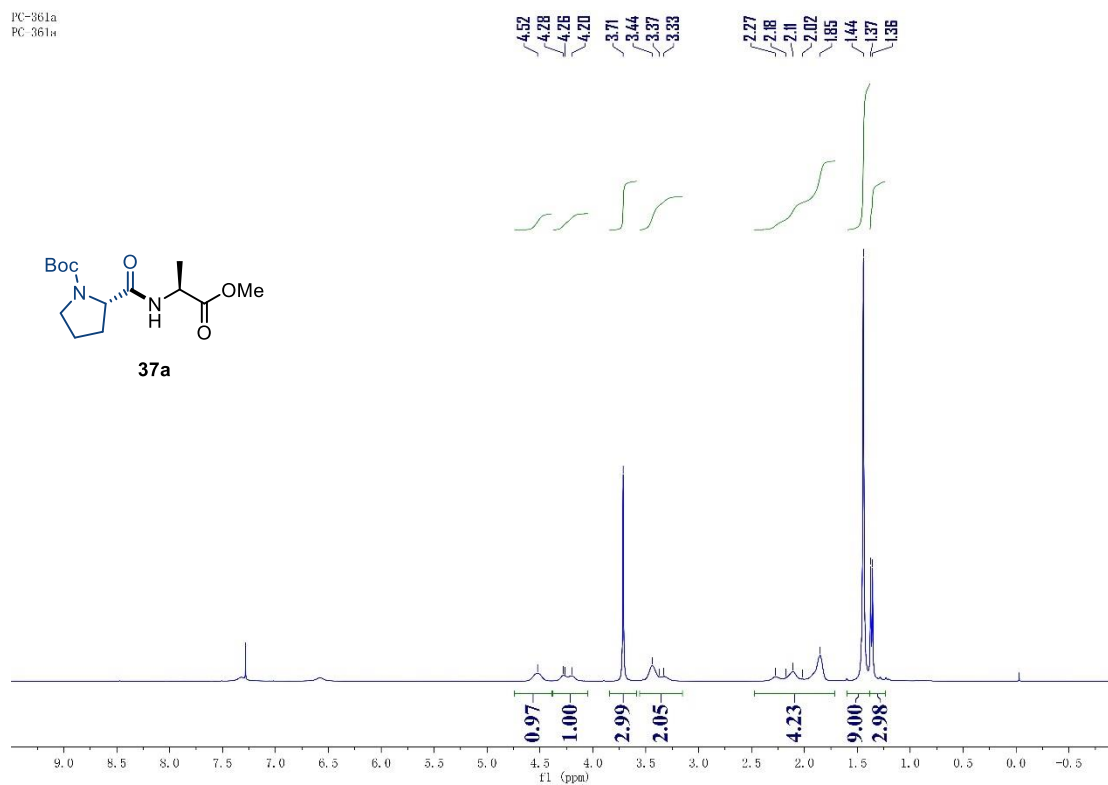

PC-361a  
PC-361a 13C

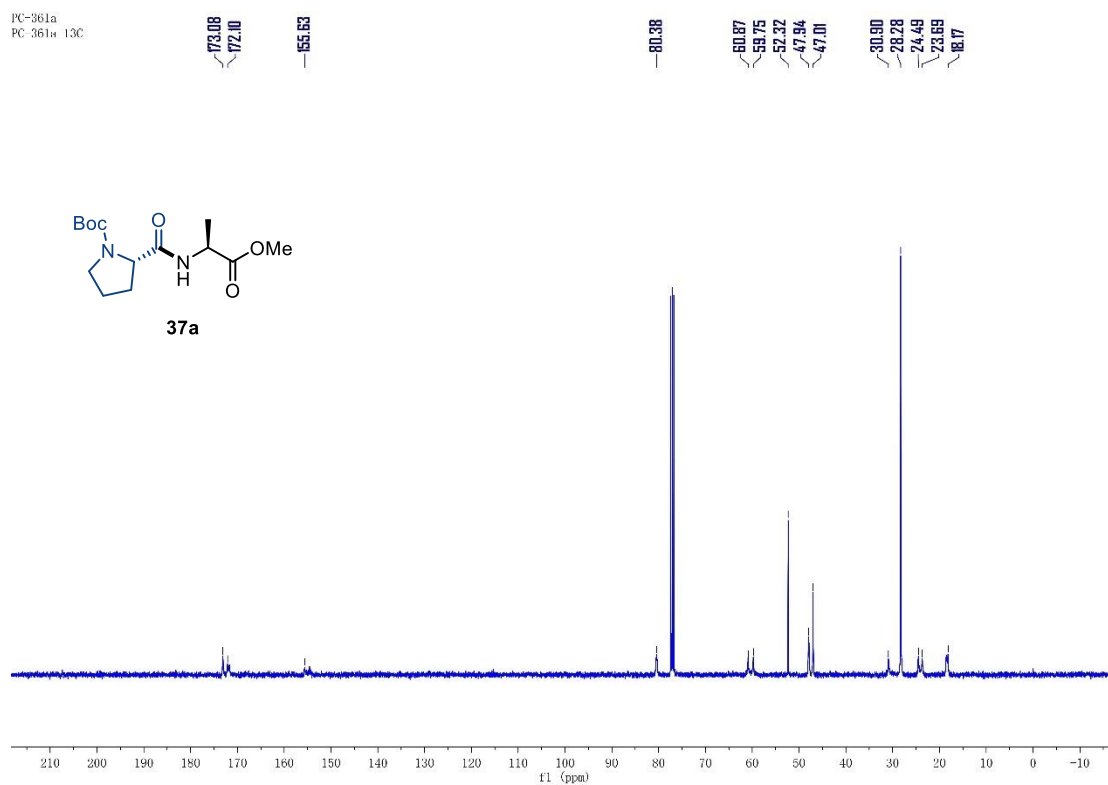

PC-361b  
PC-361b 1H

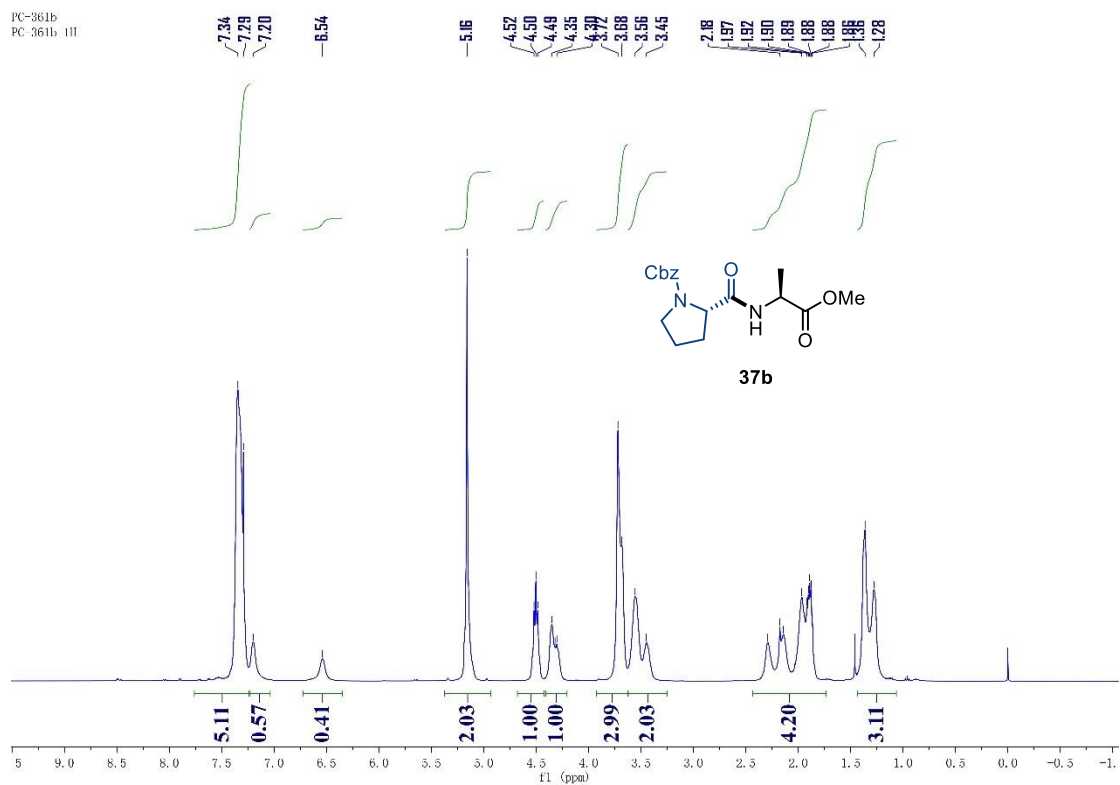

PC-361b  
PC-361b 13C

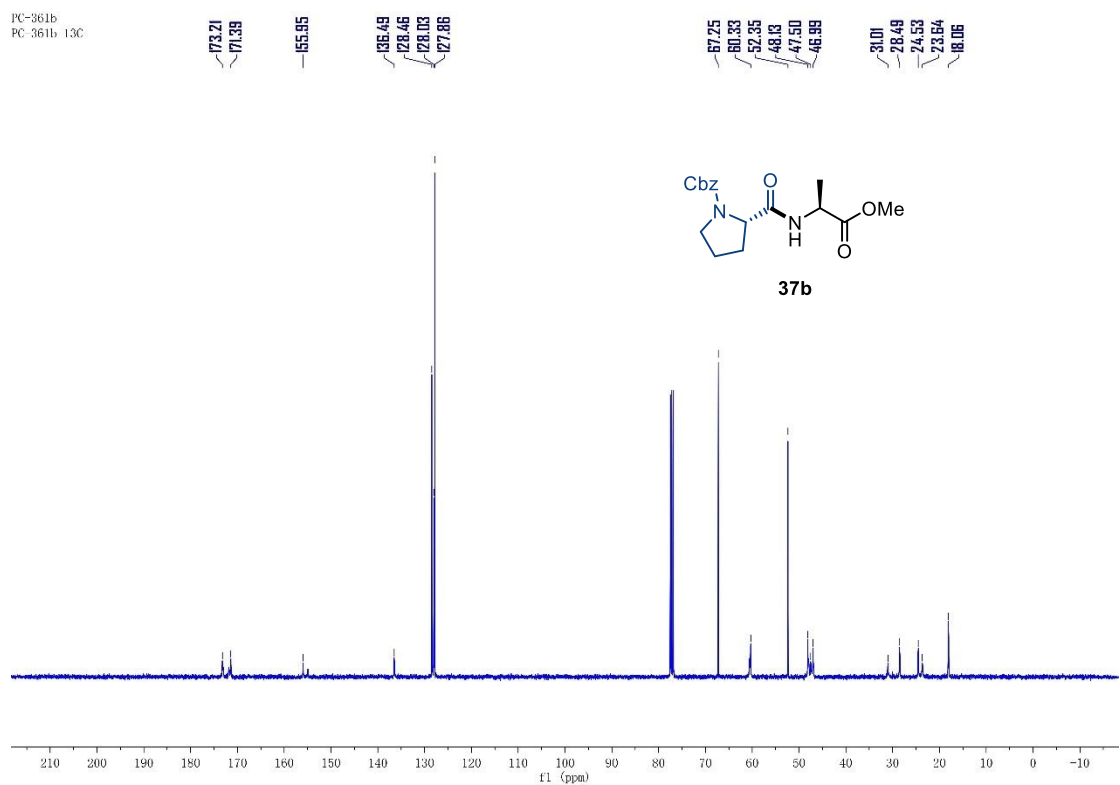

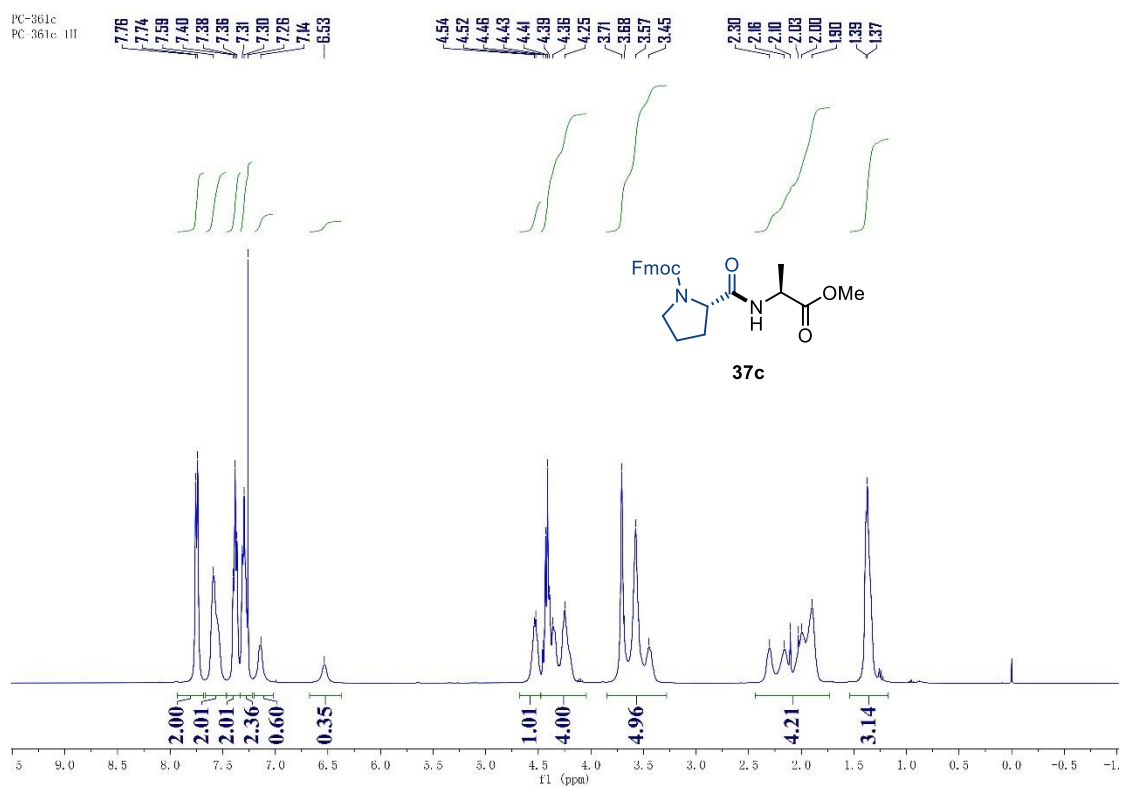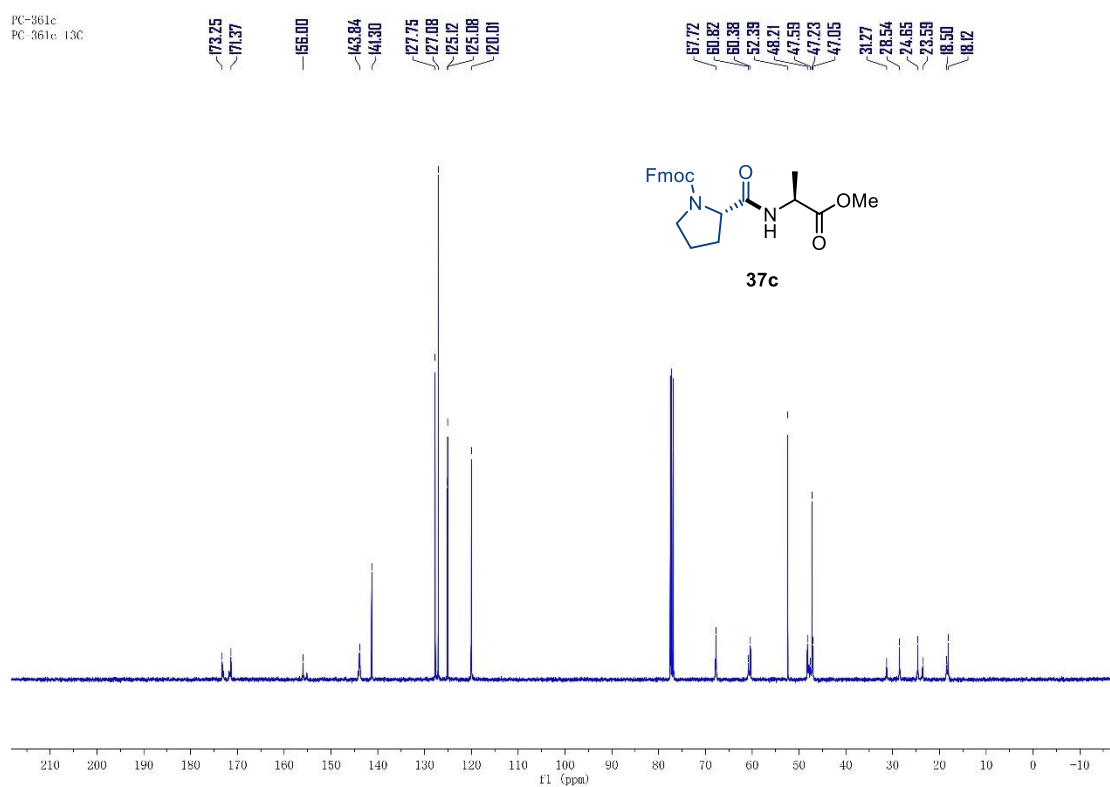

PC-358b  
PC-358b: 1H

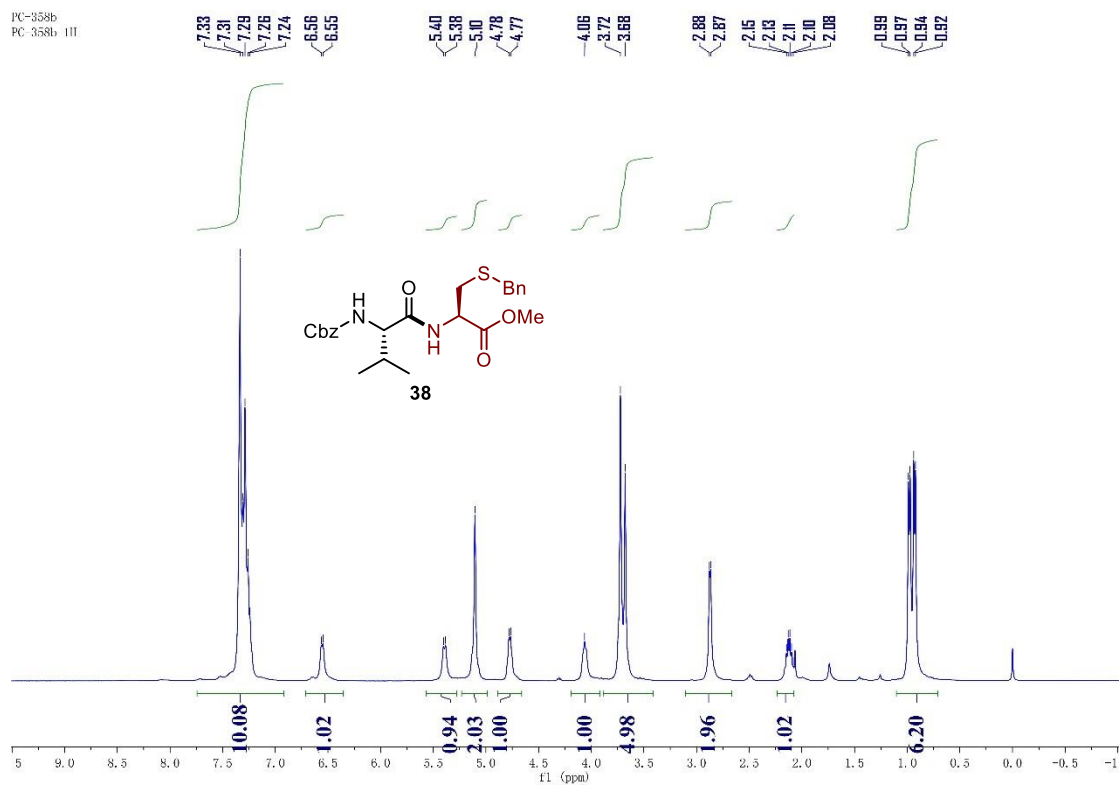

PC-358b  
PC-358b: 13C

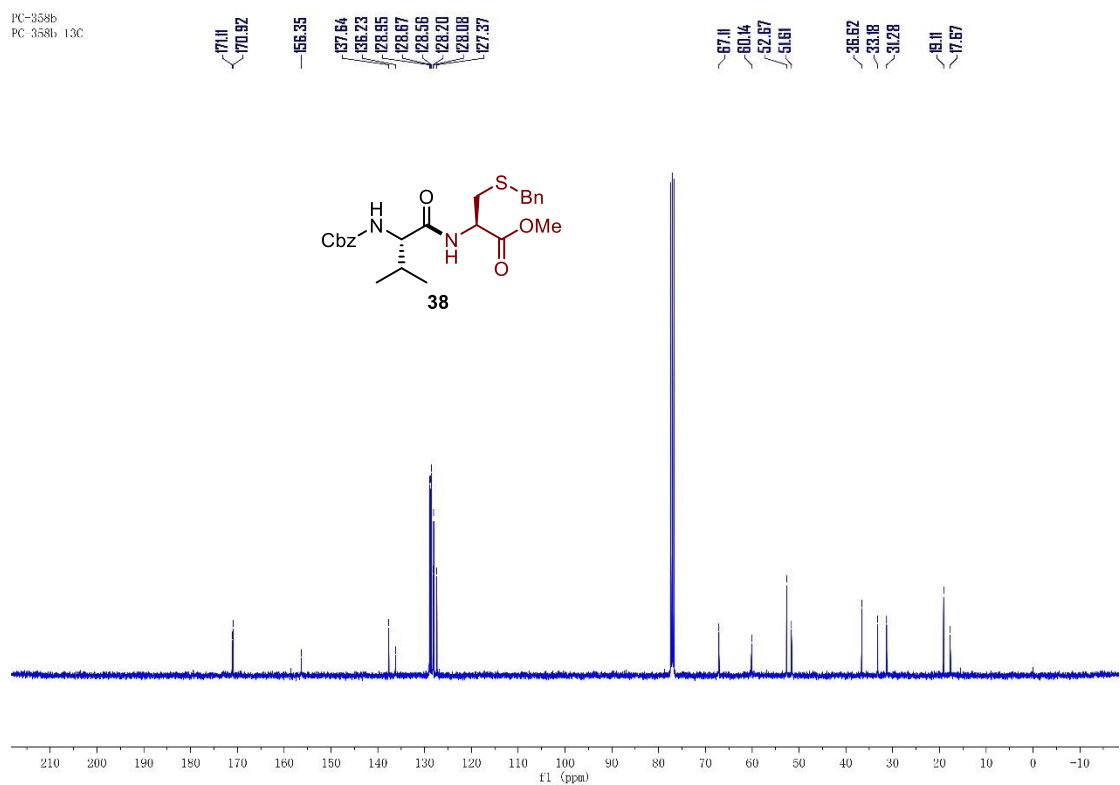

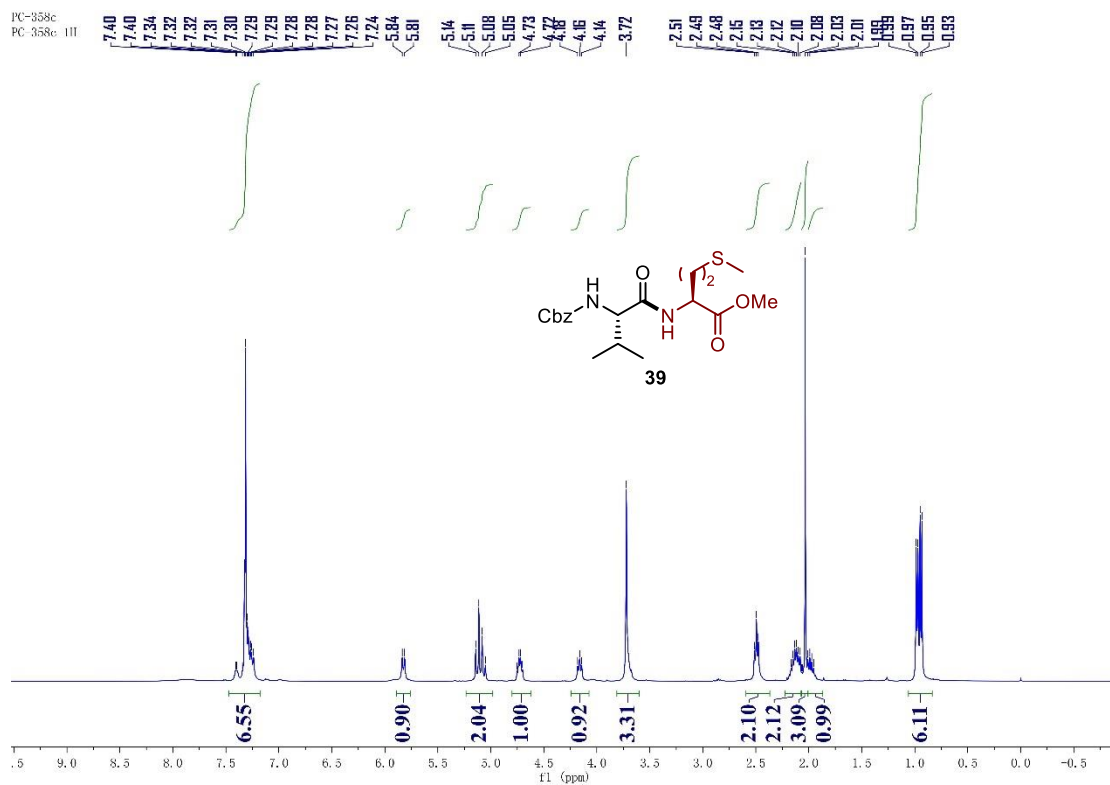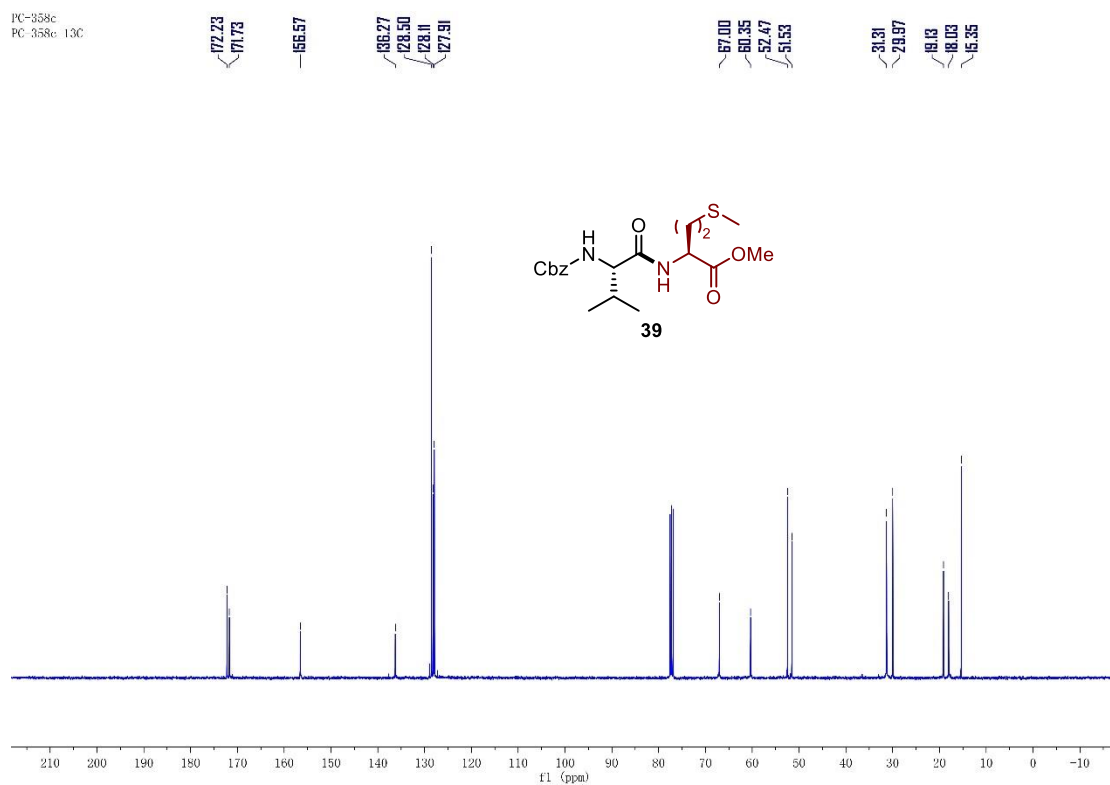

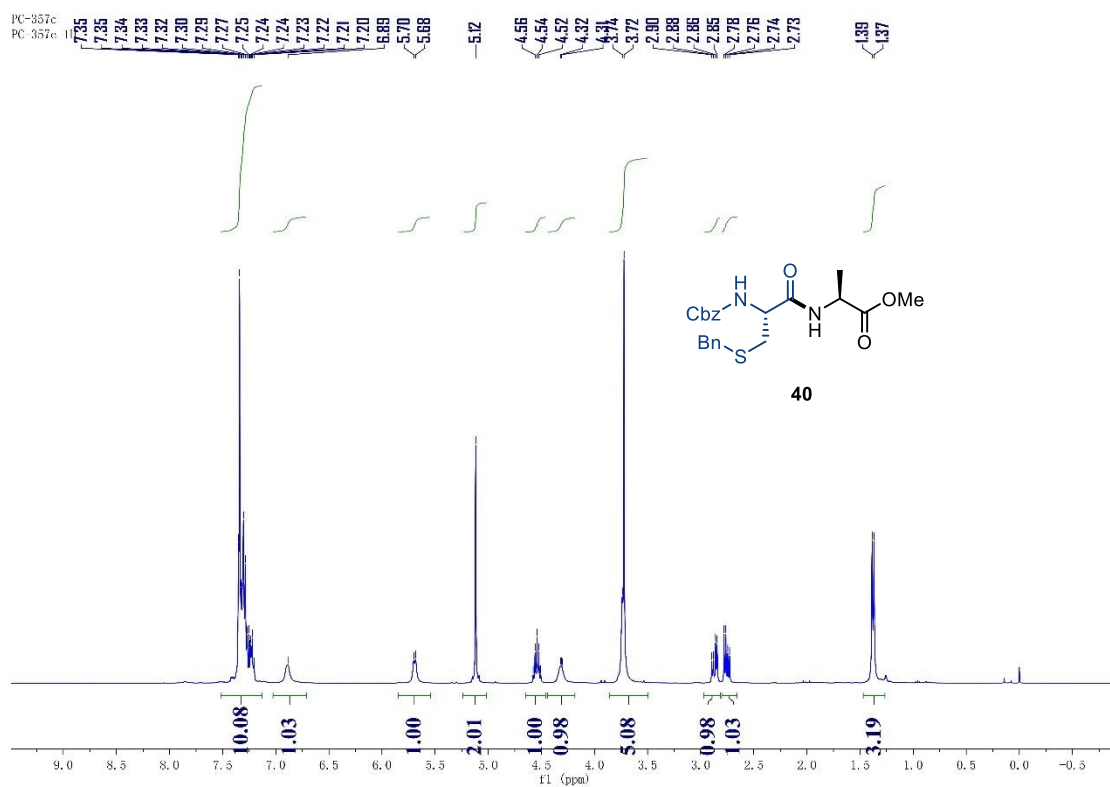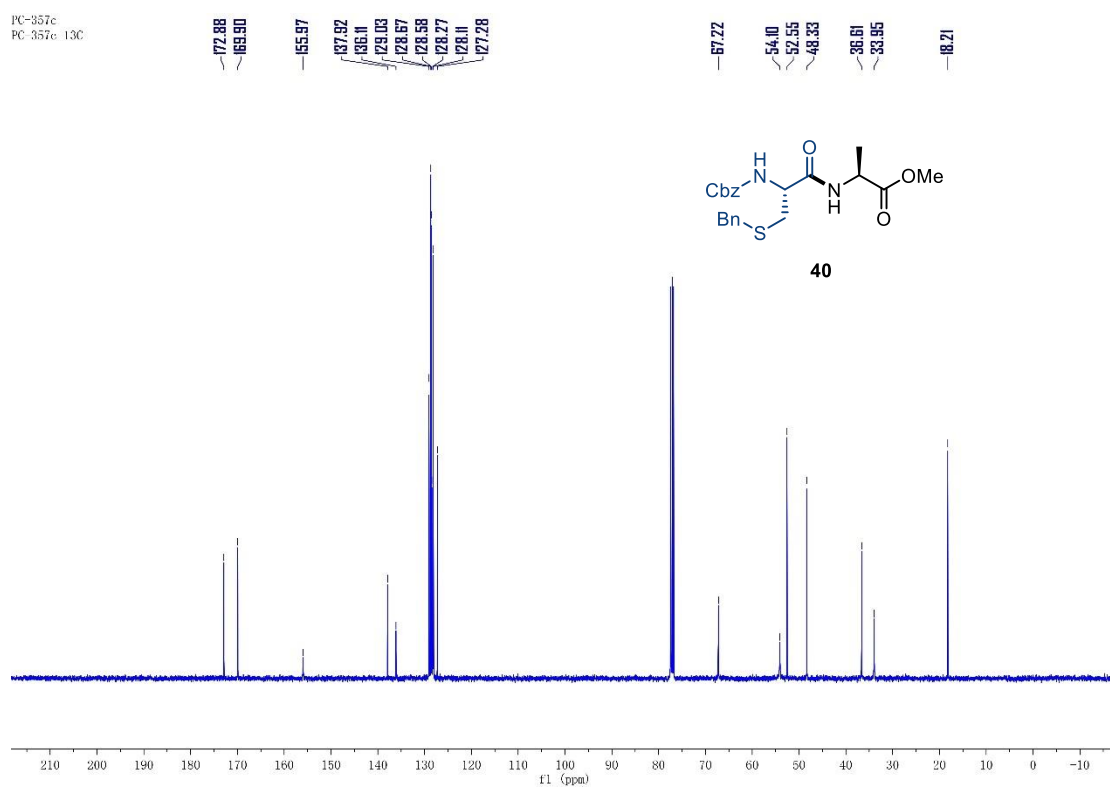

PC-357d  
PC-357d 1H

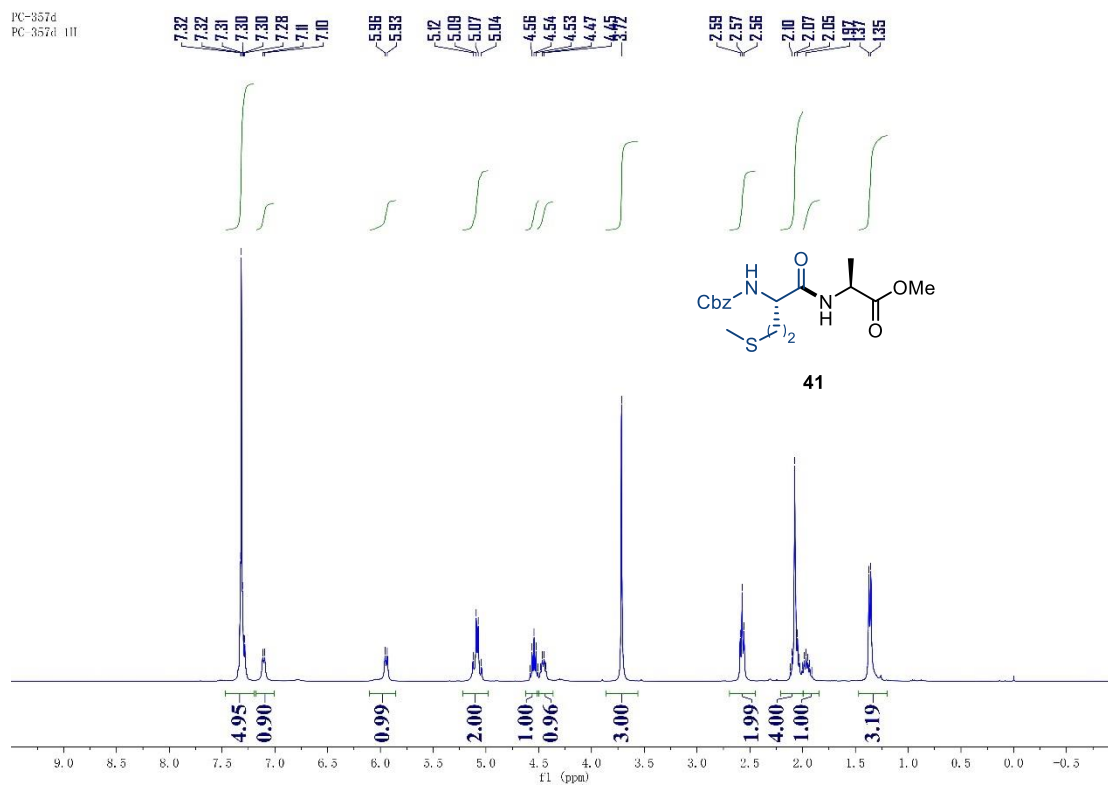

PC-357d  
PC-357d 13C

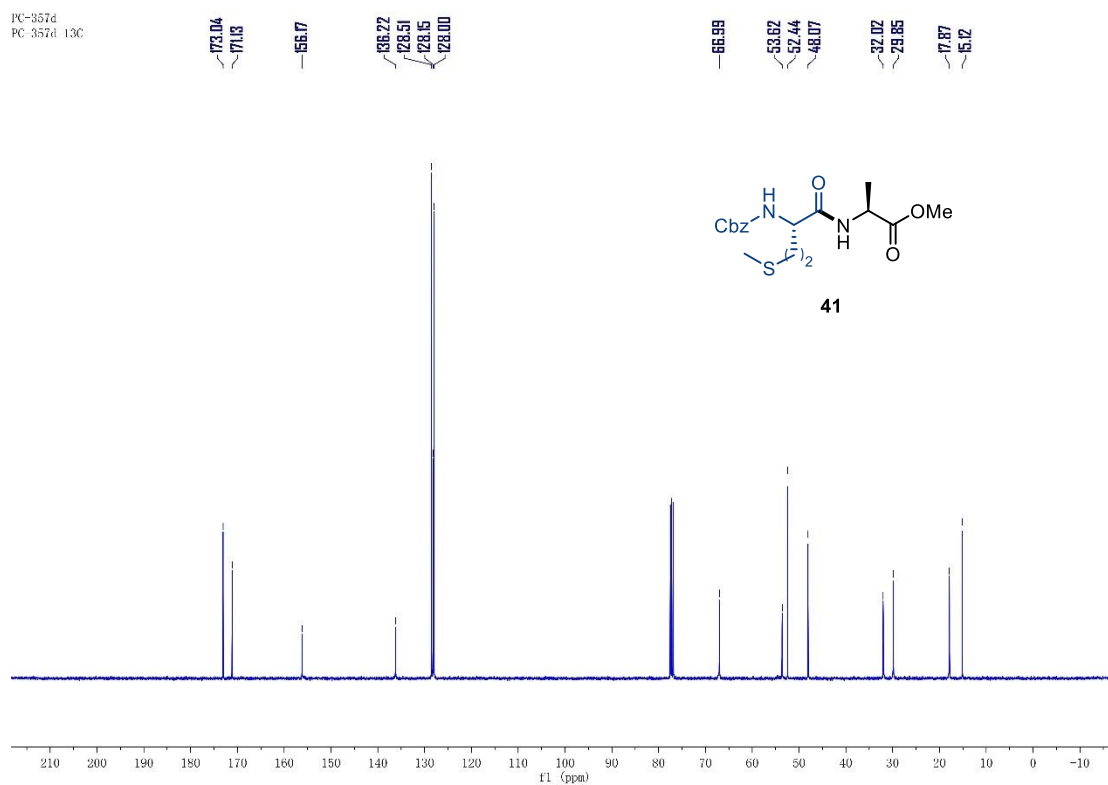

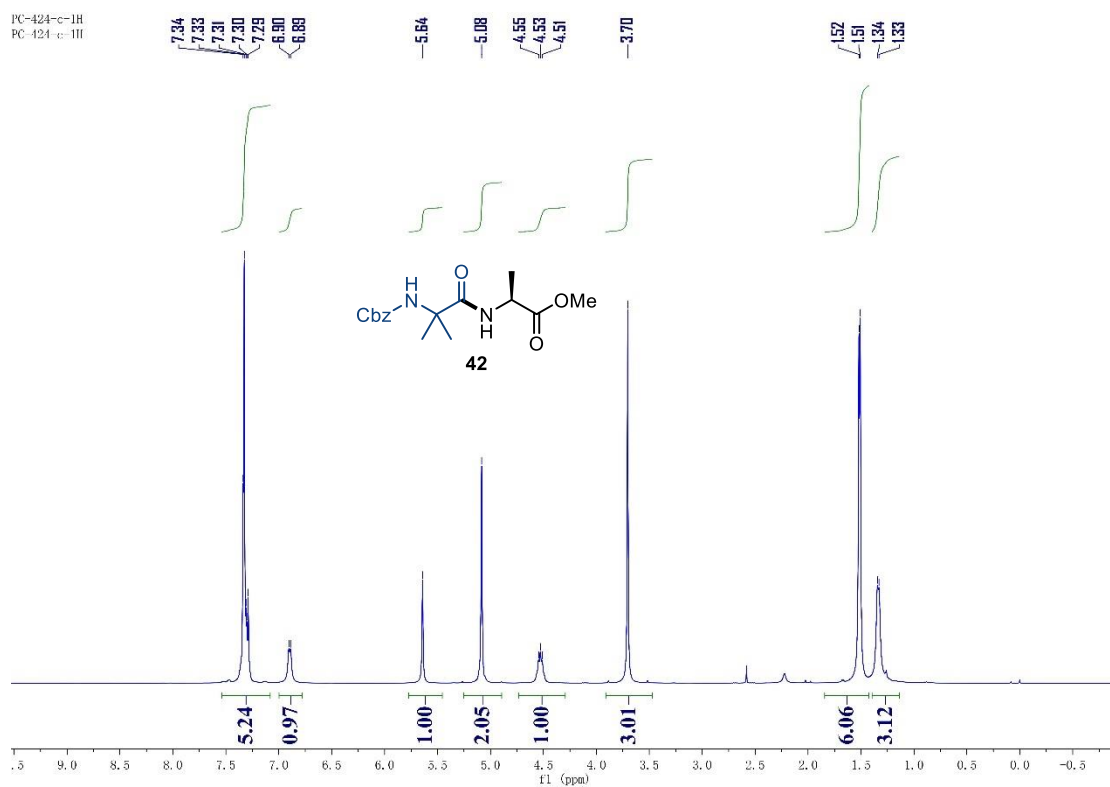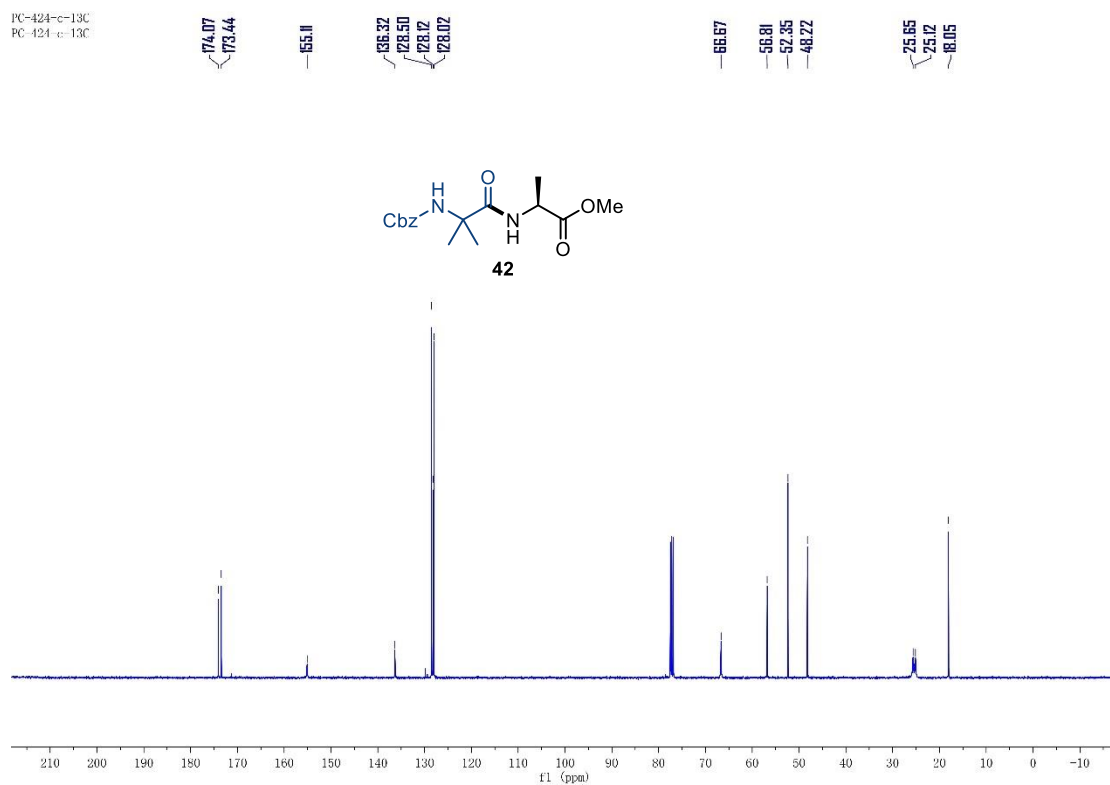

PC-426-1H  
PC-426-1H

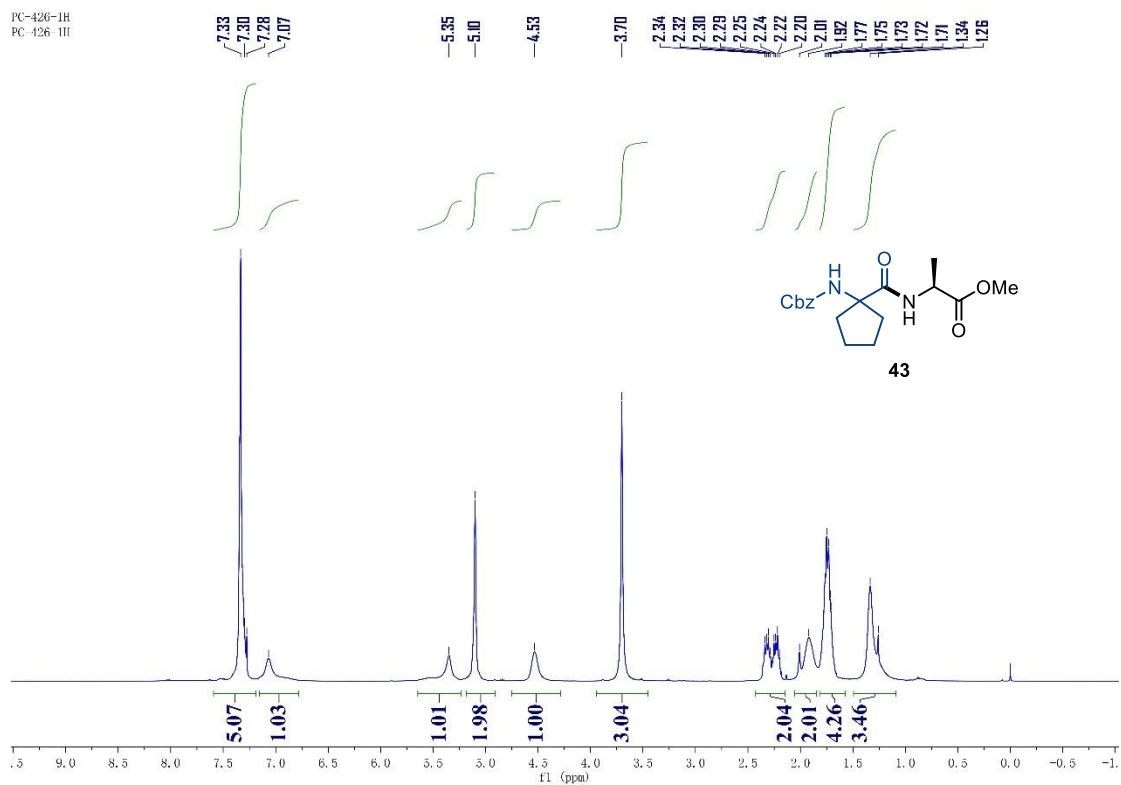

PC-426-C13  
PC-426-C13

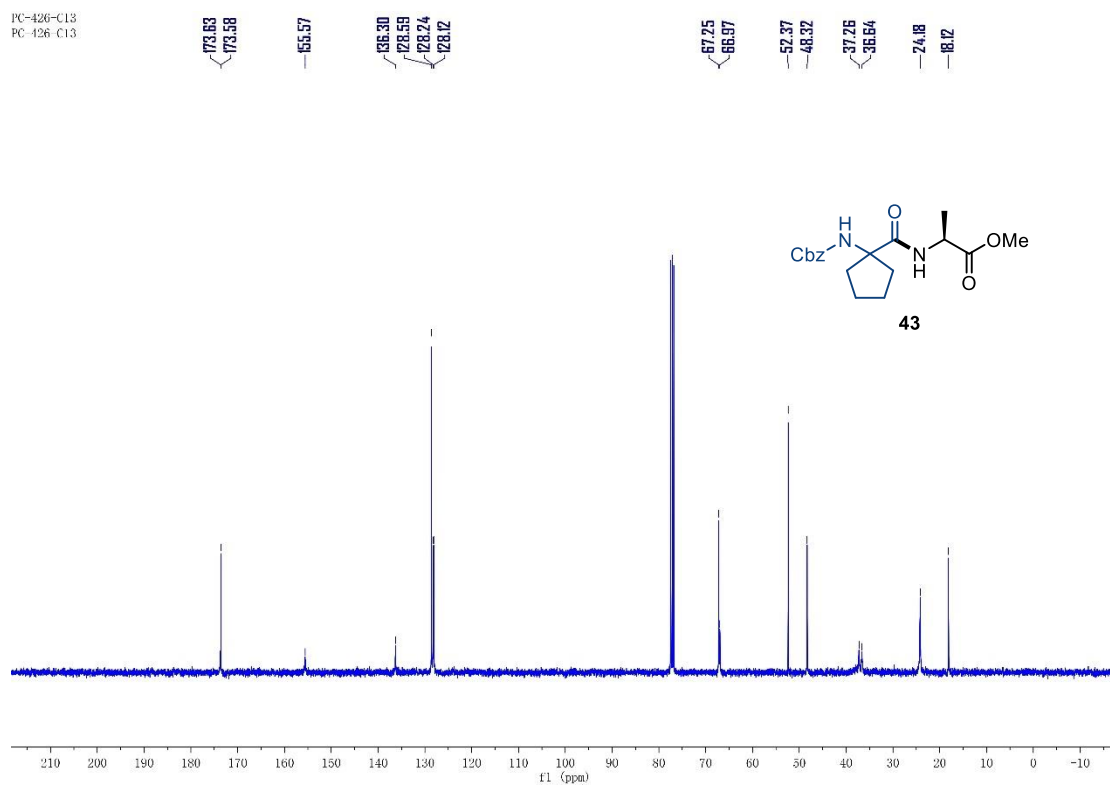

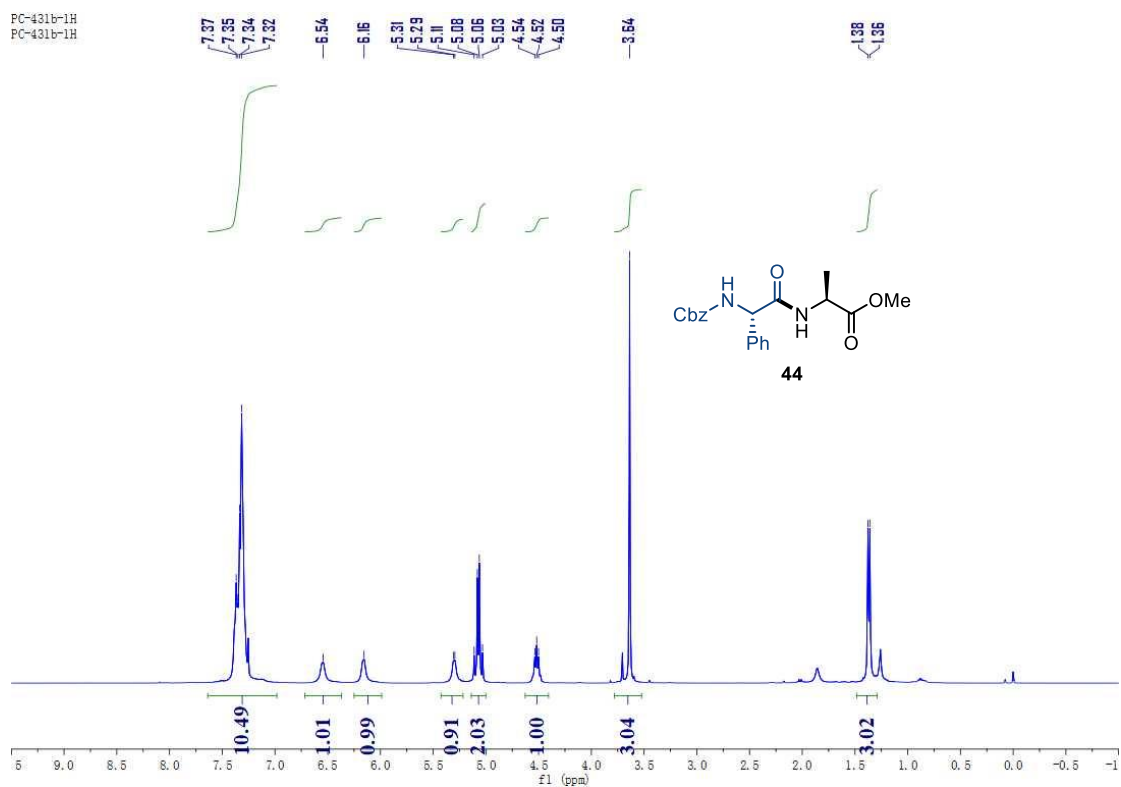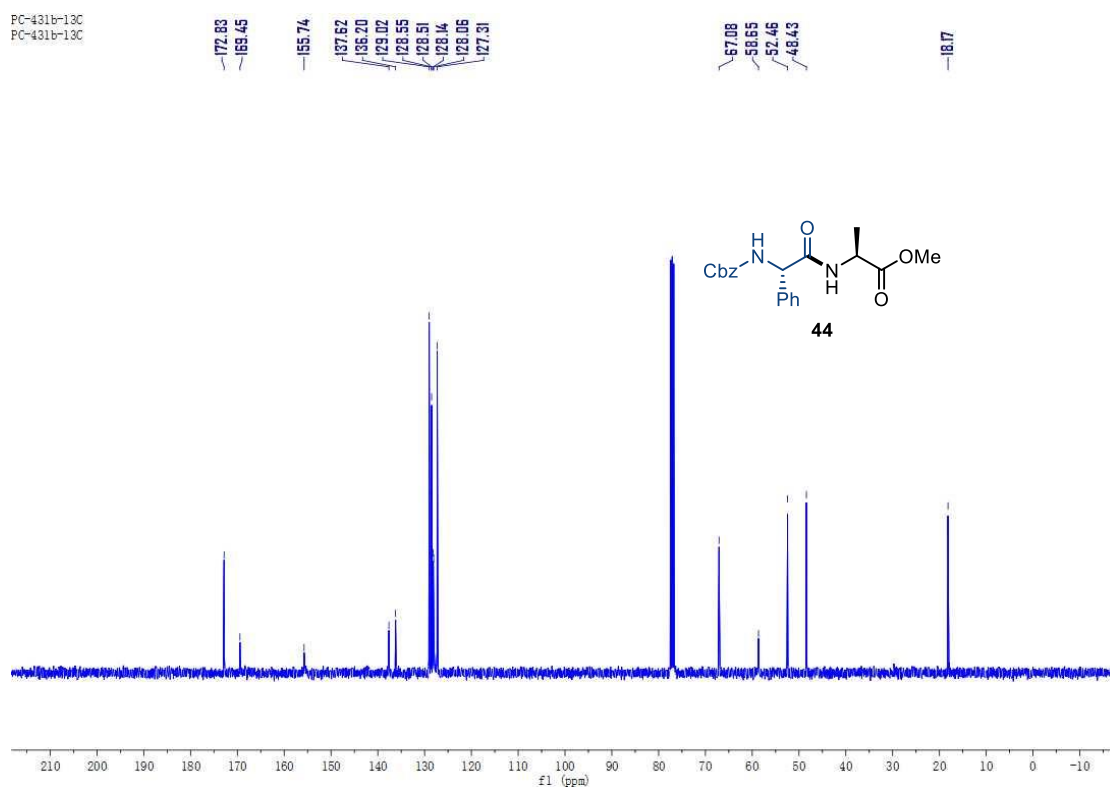

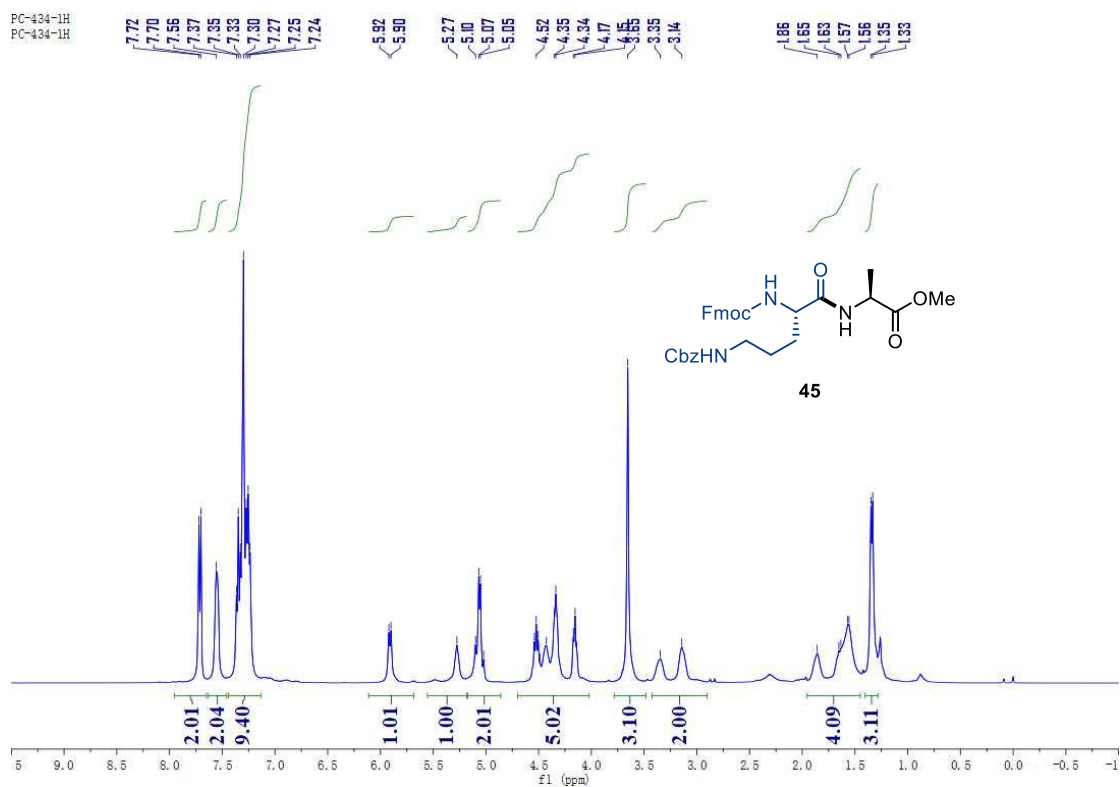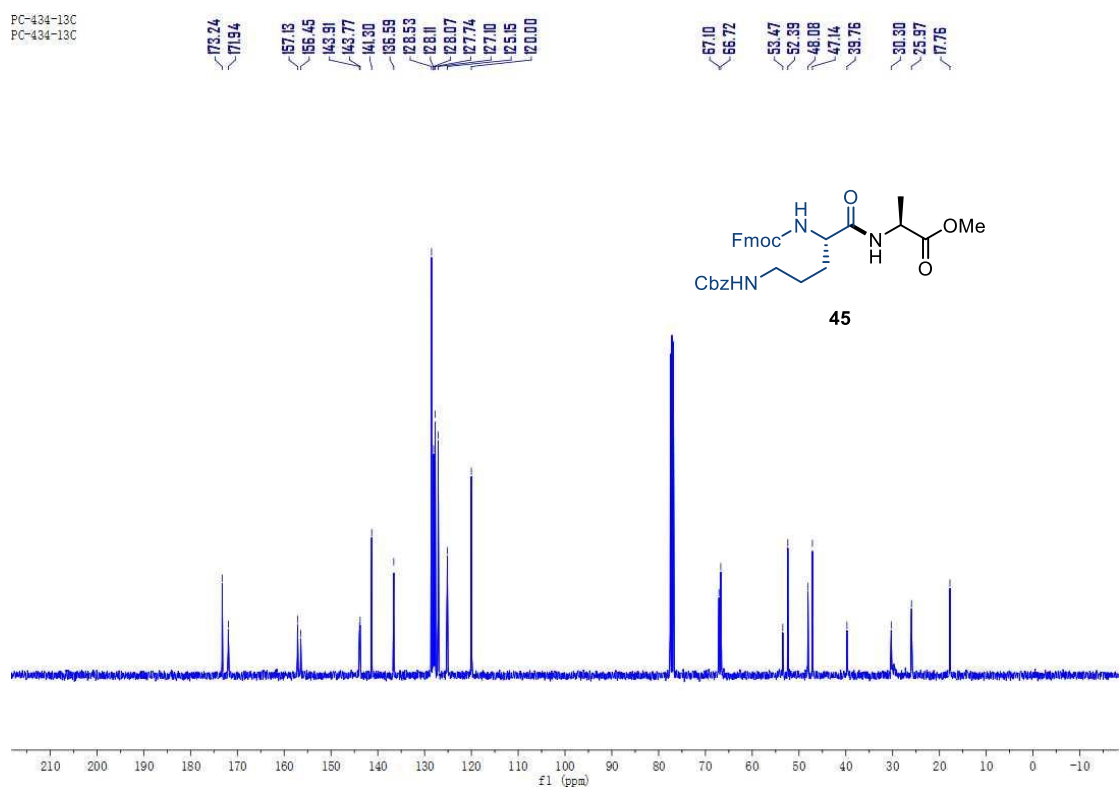

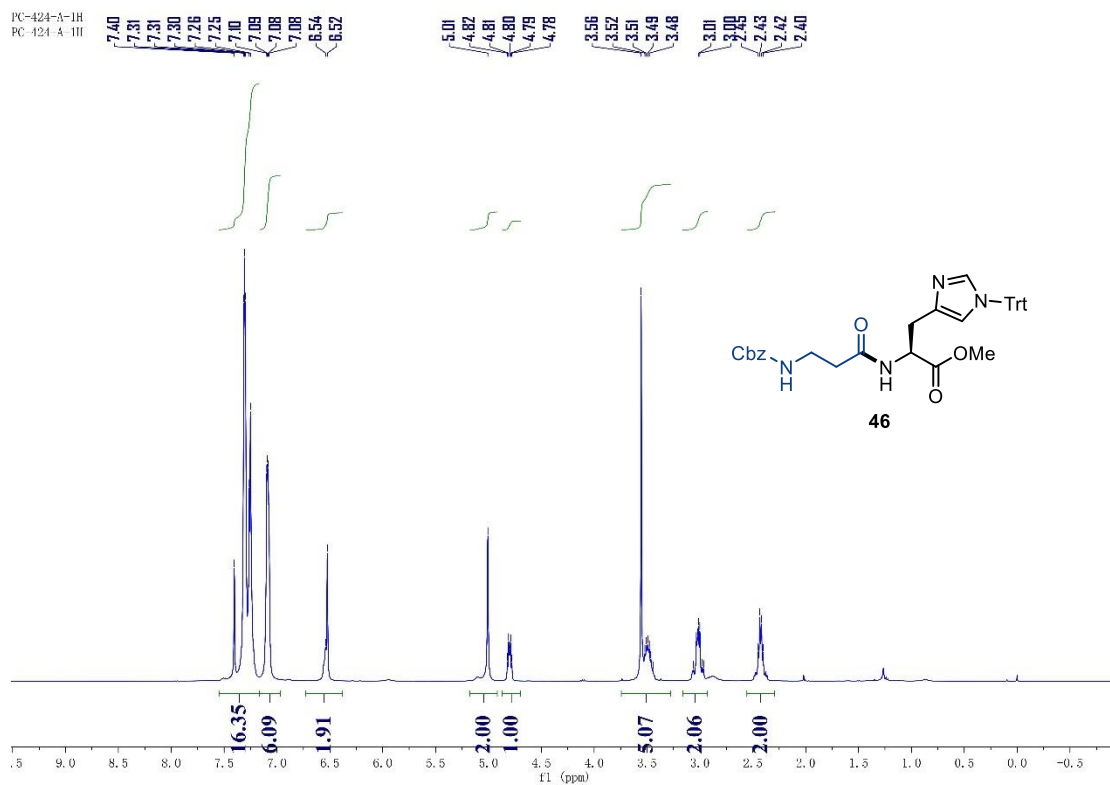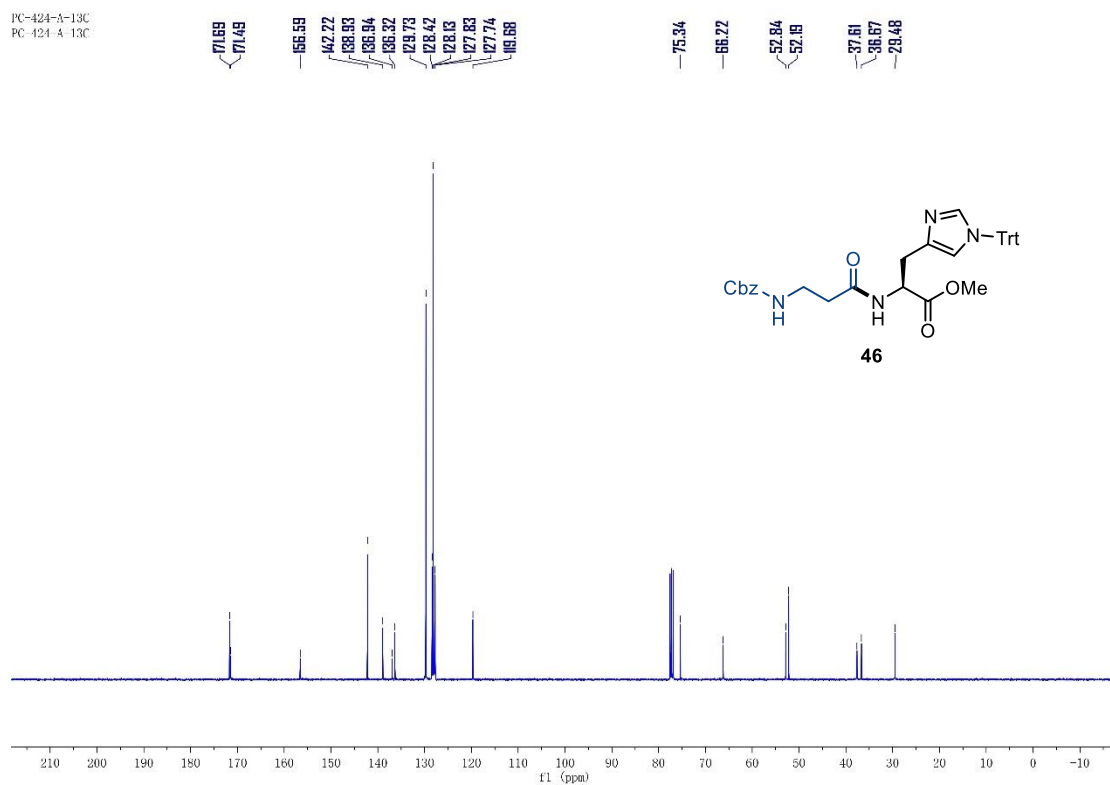

PC-435-1H  
PC-435 1H

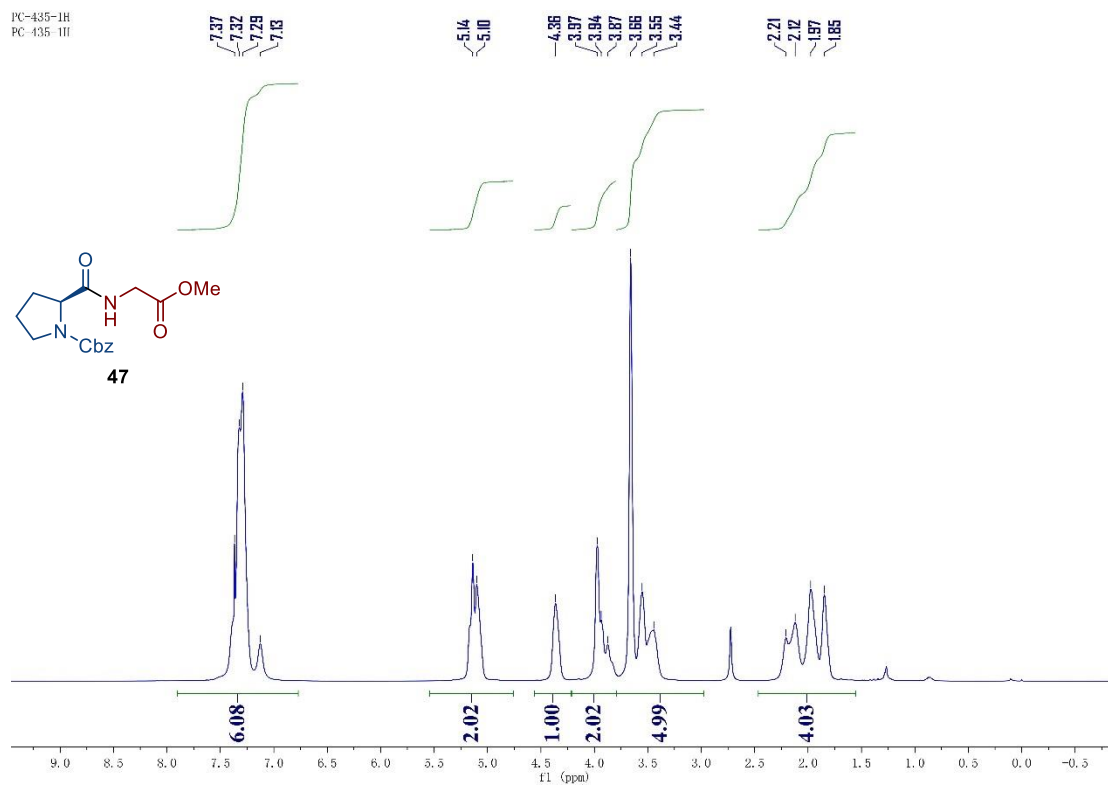

PC-435-13C  
PC-435 13C

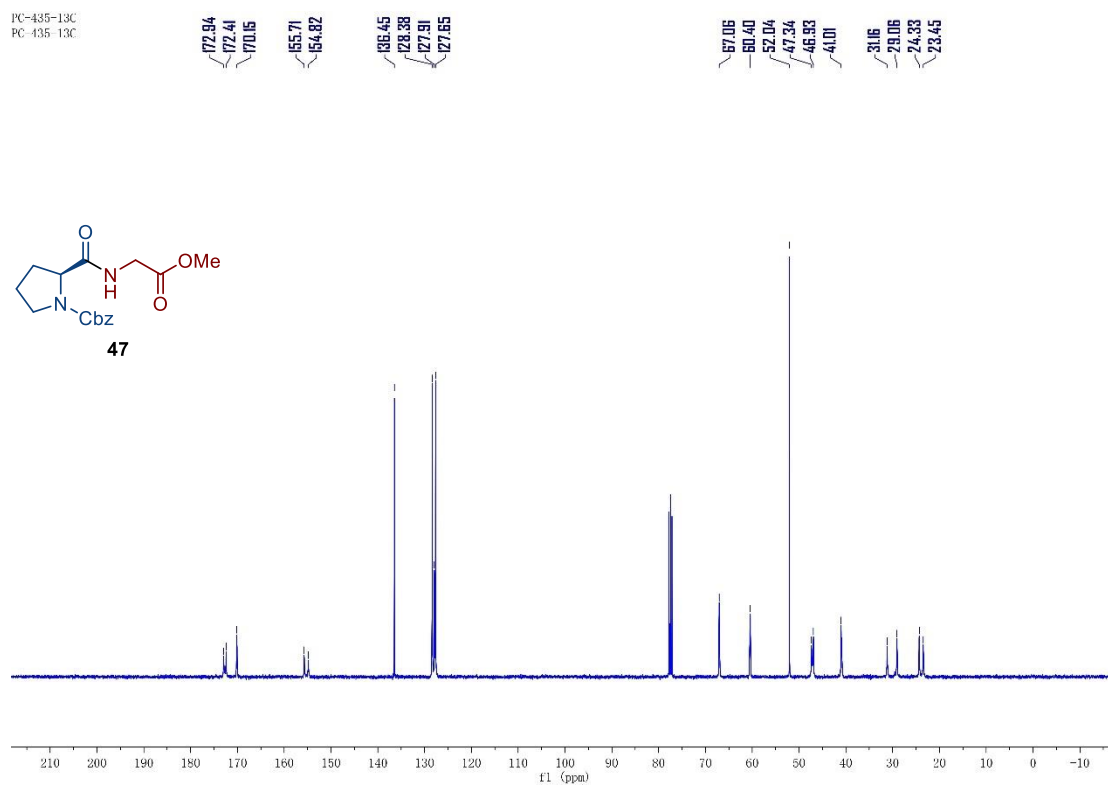

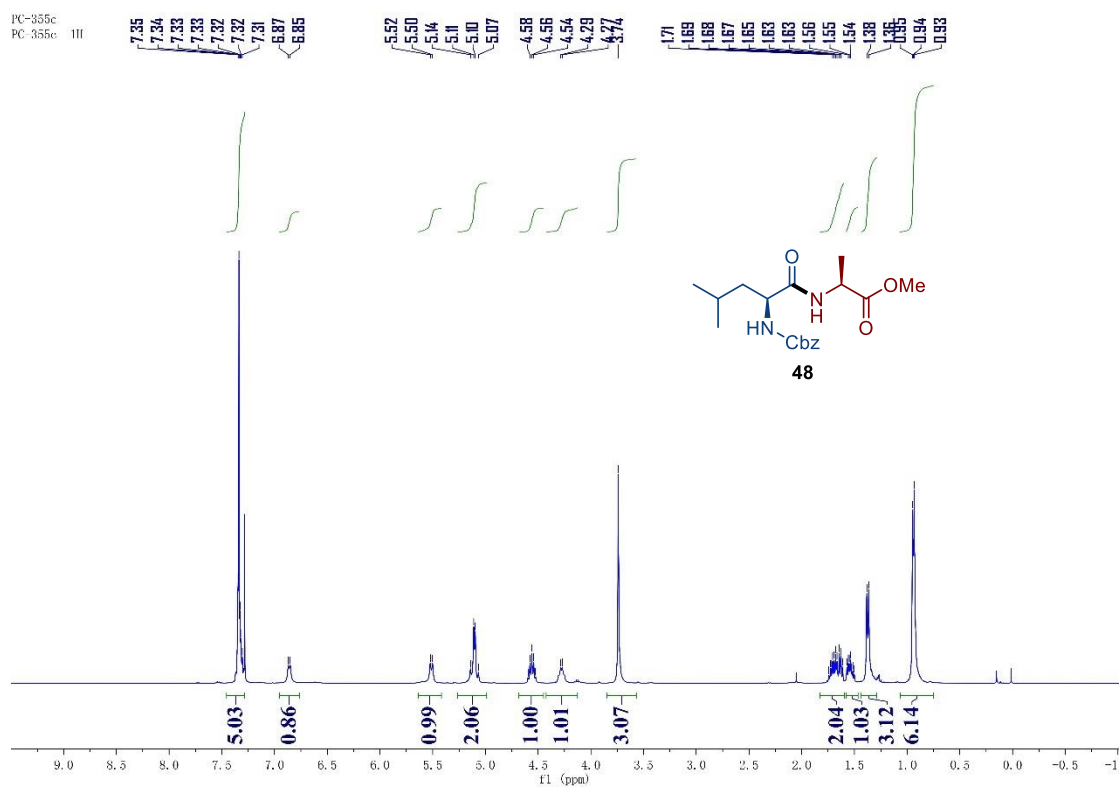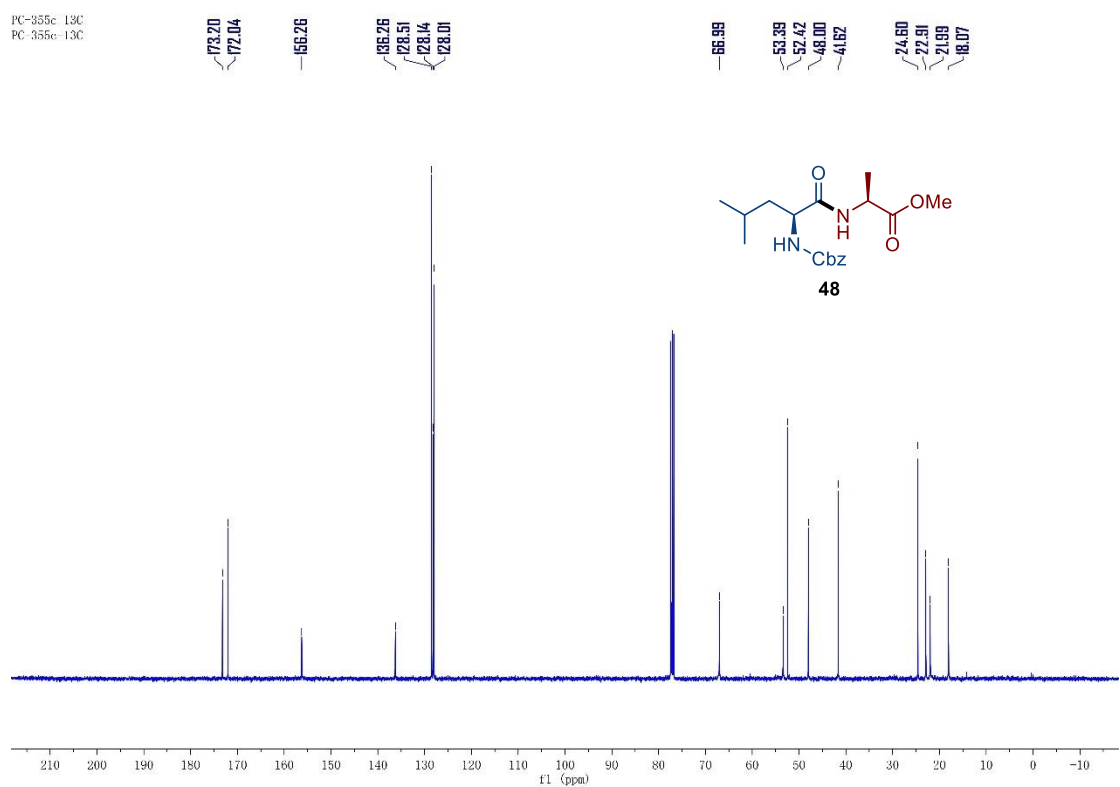

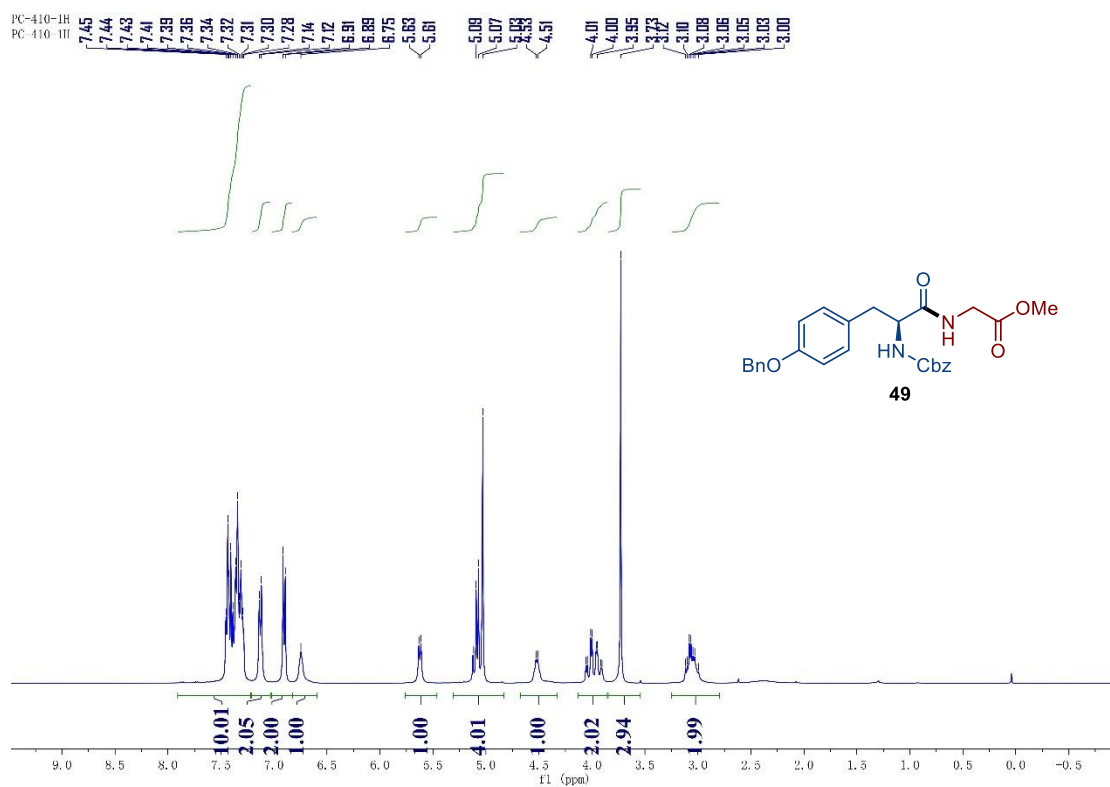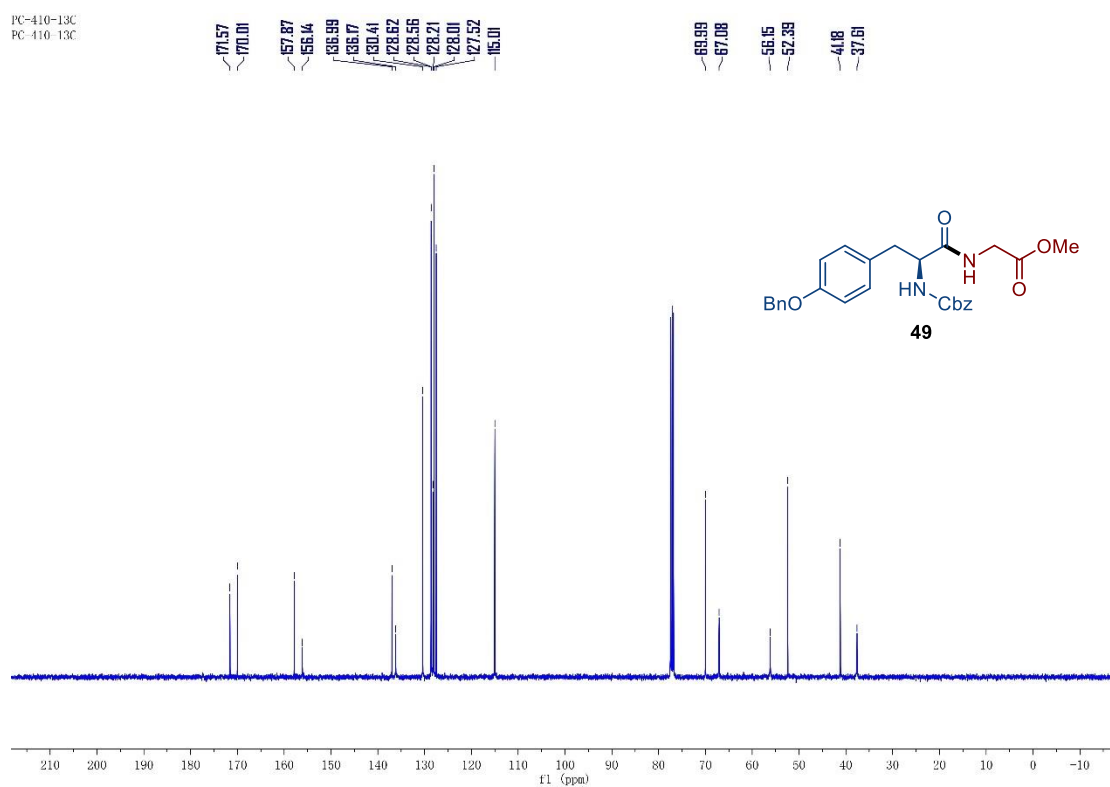

PC-412-1H  
PC-412-1H

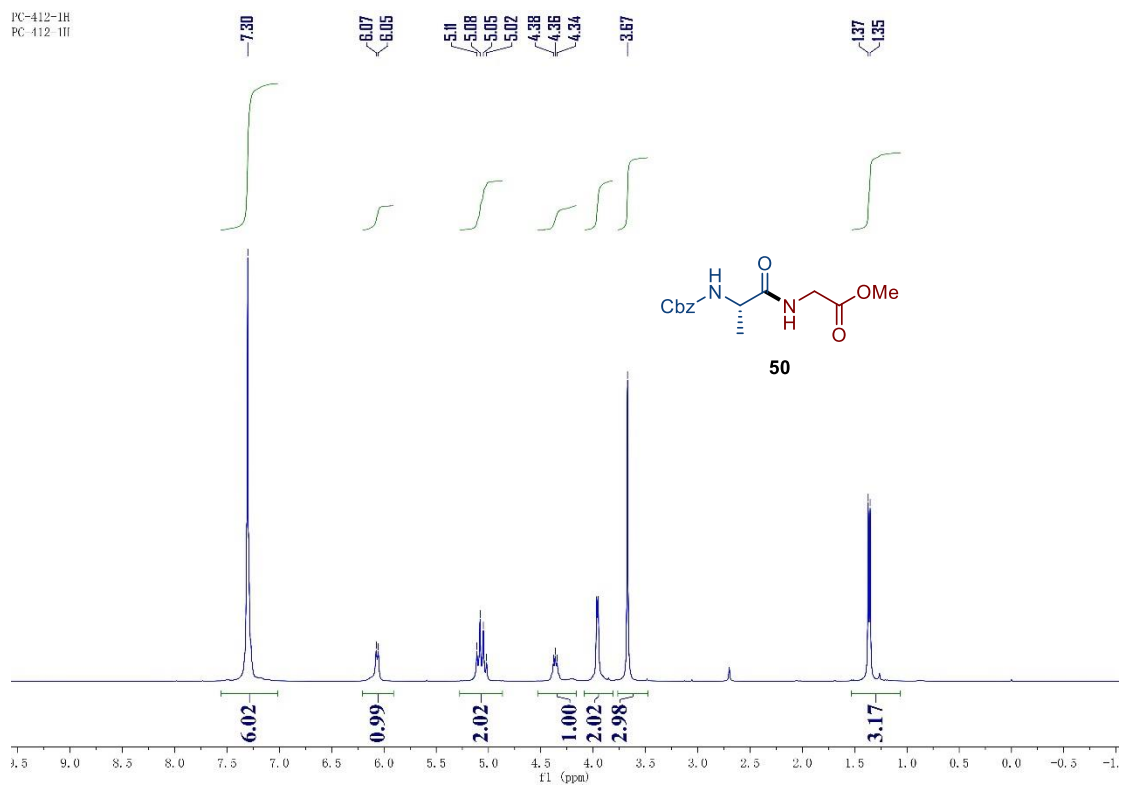

PC-412-13C  
PC-412-13C

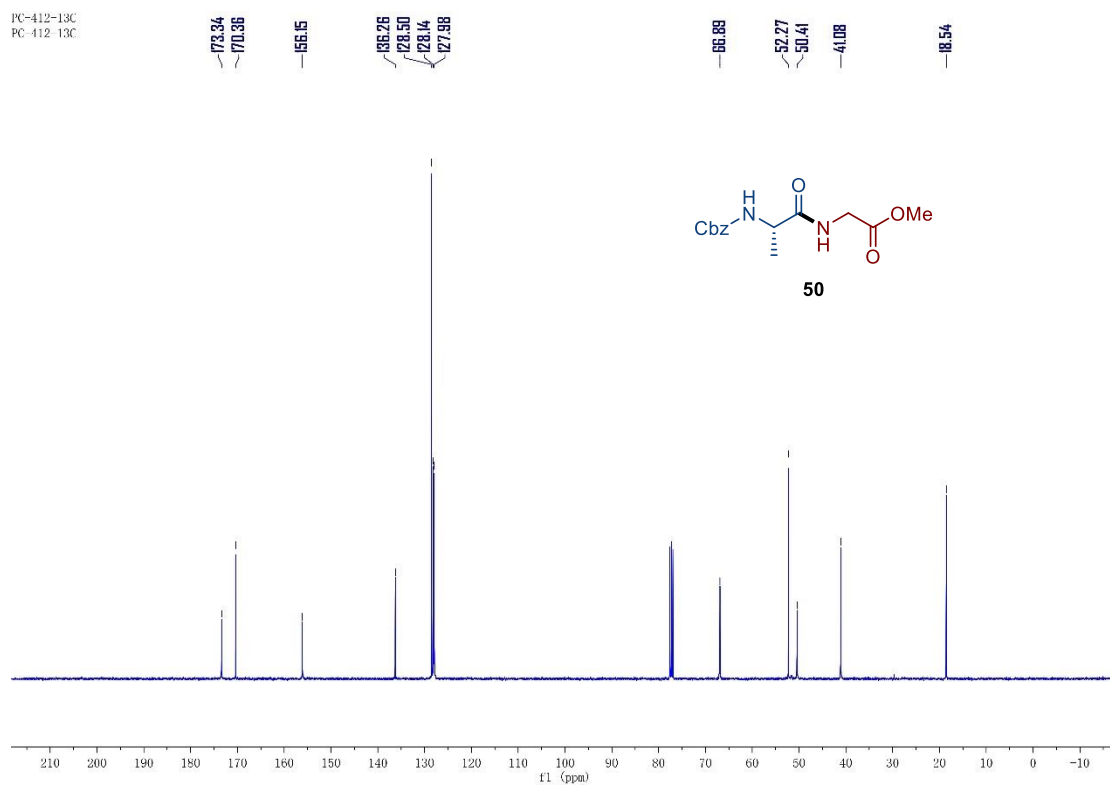

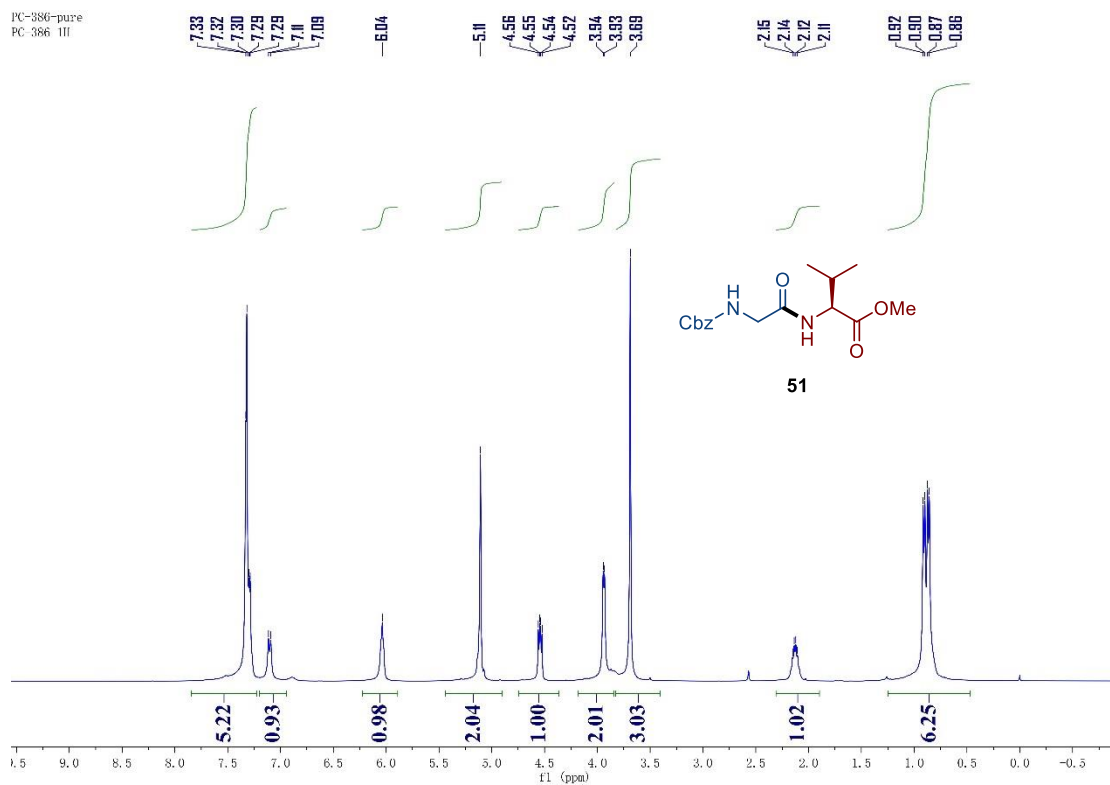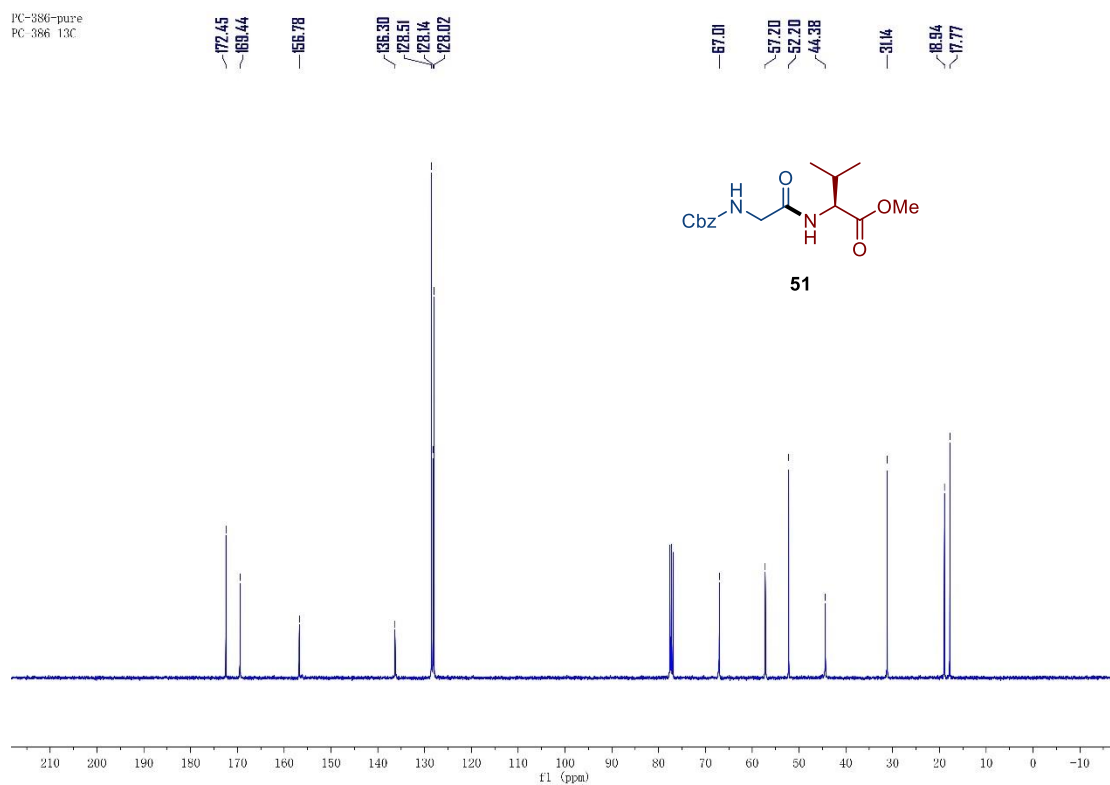

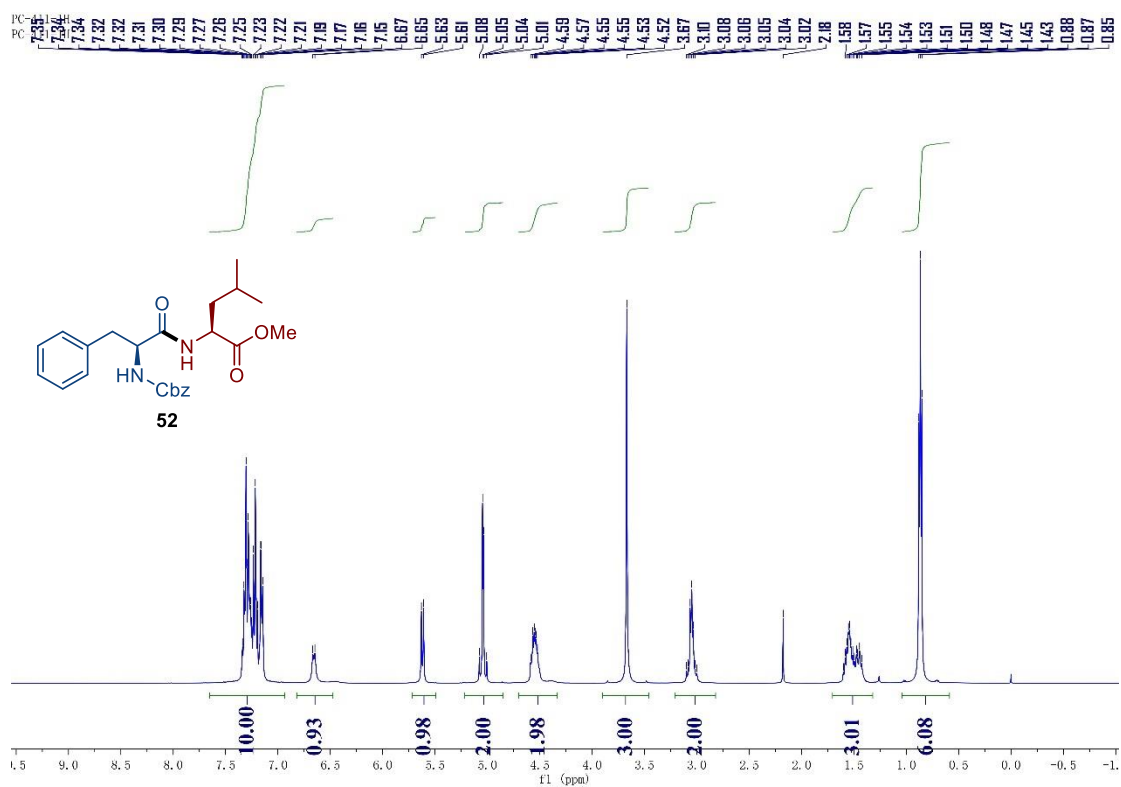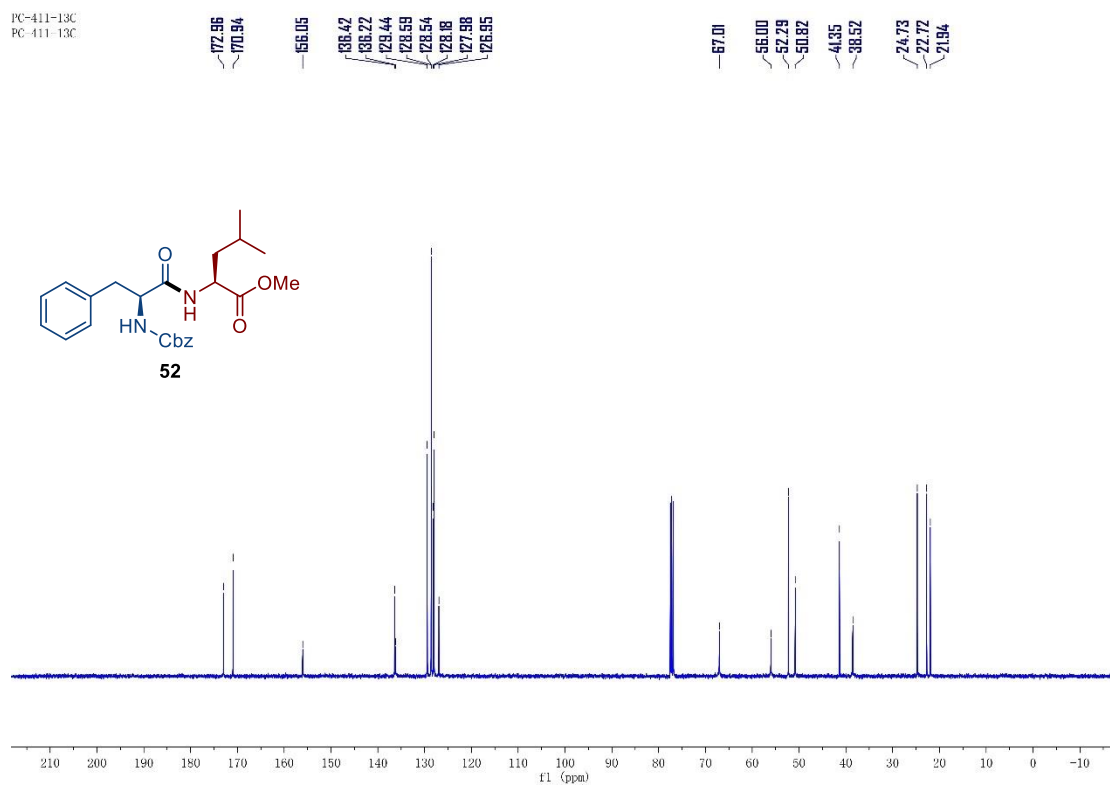

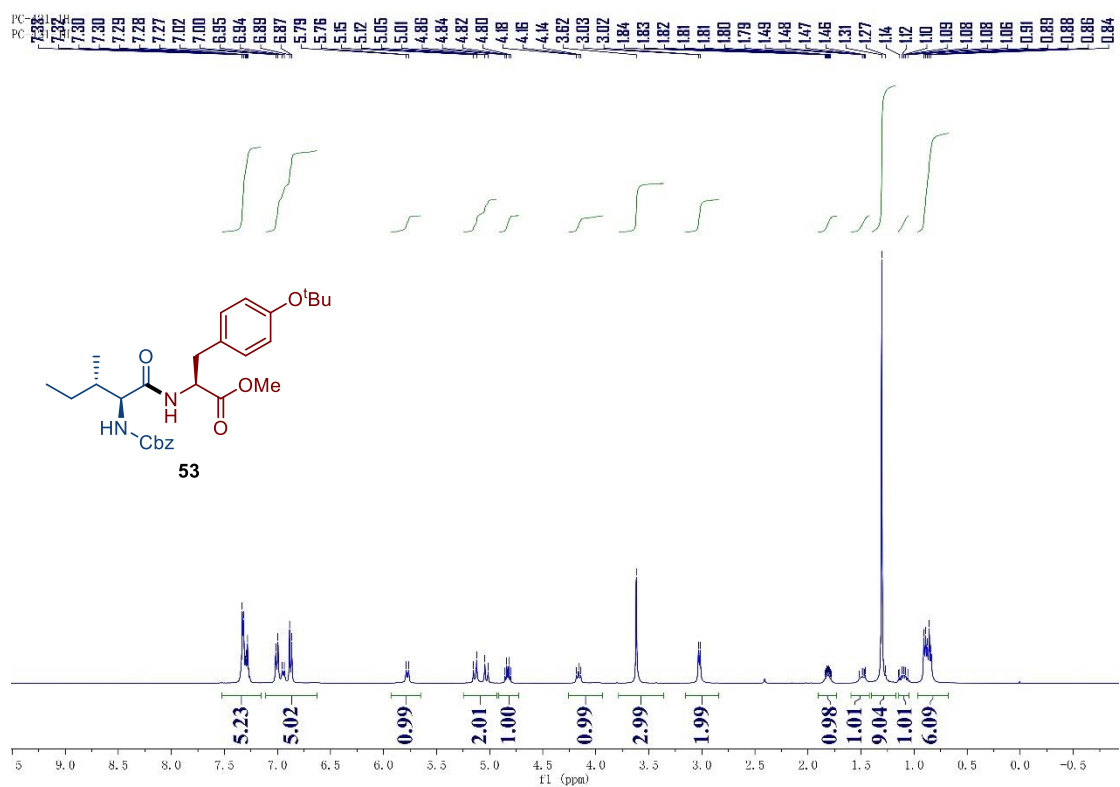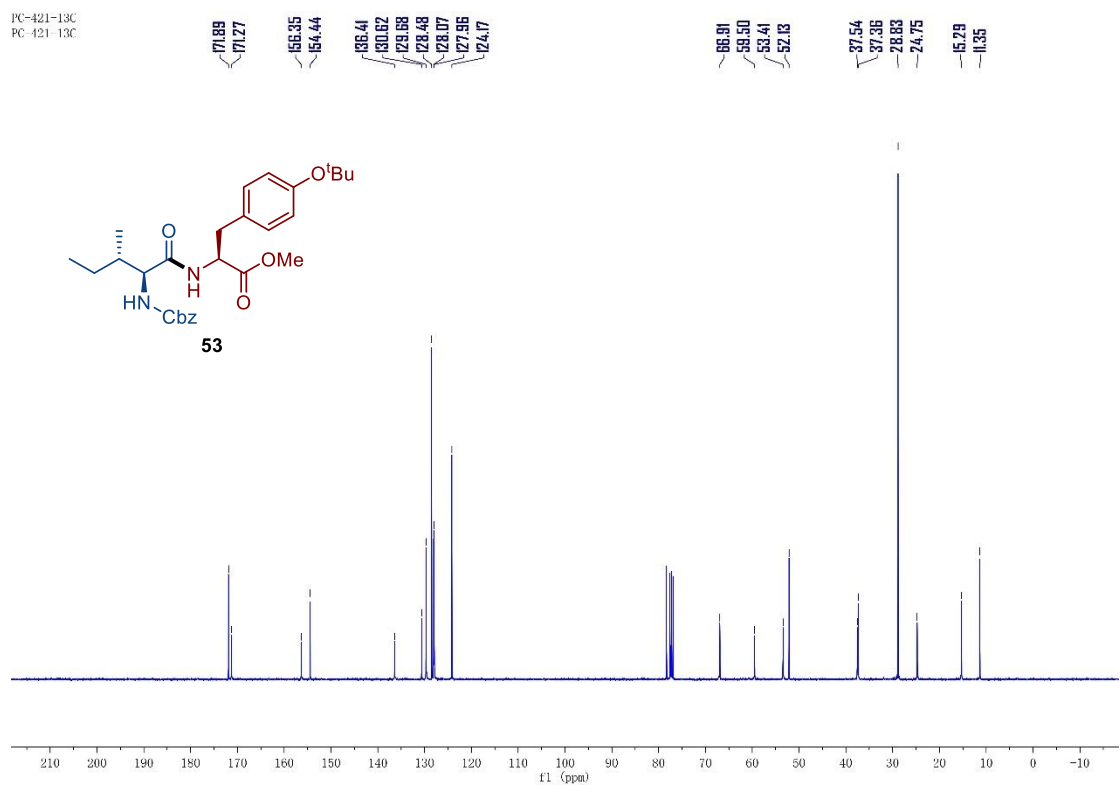

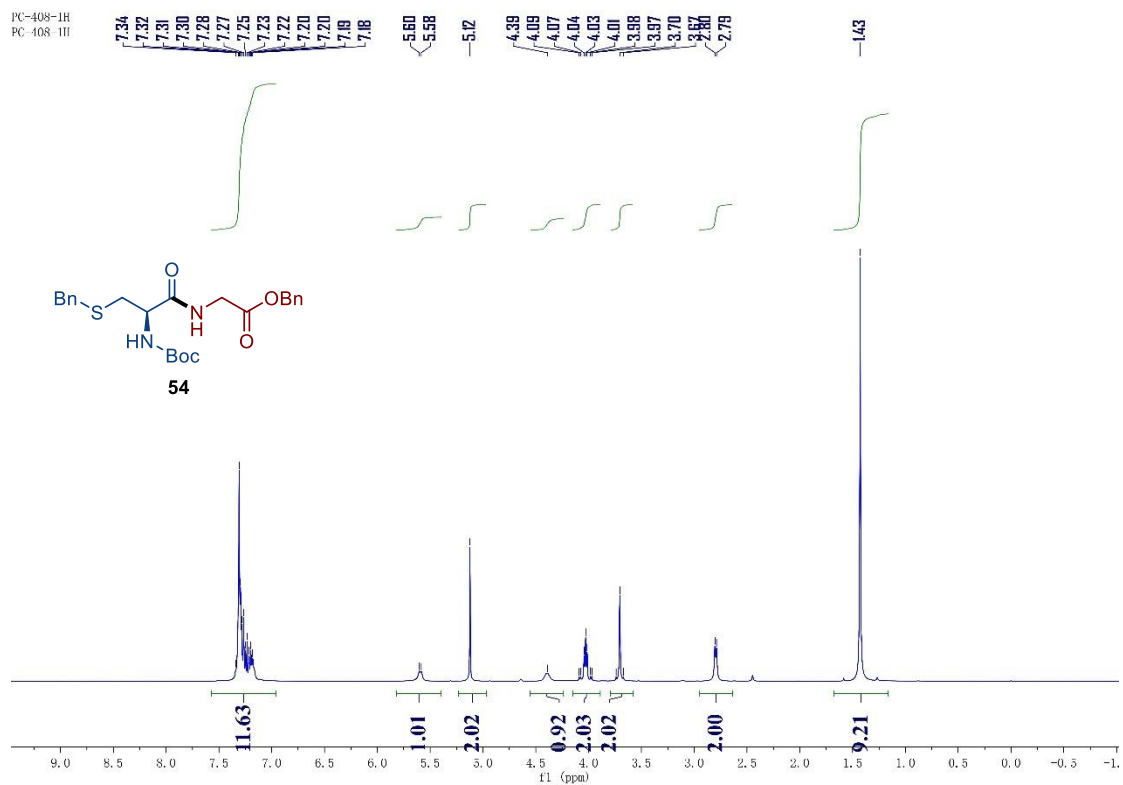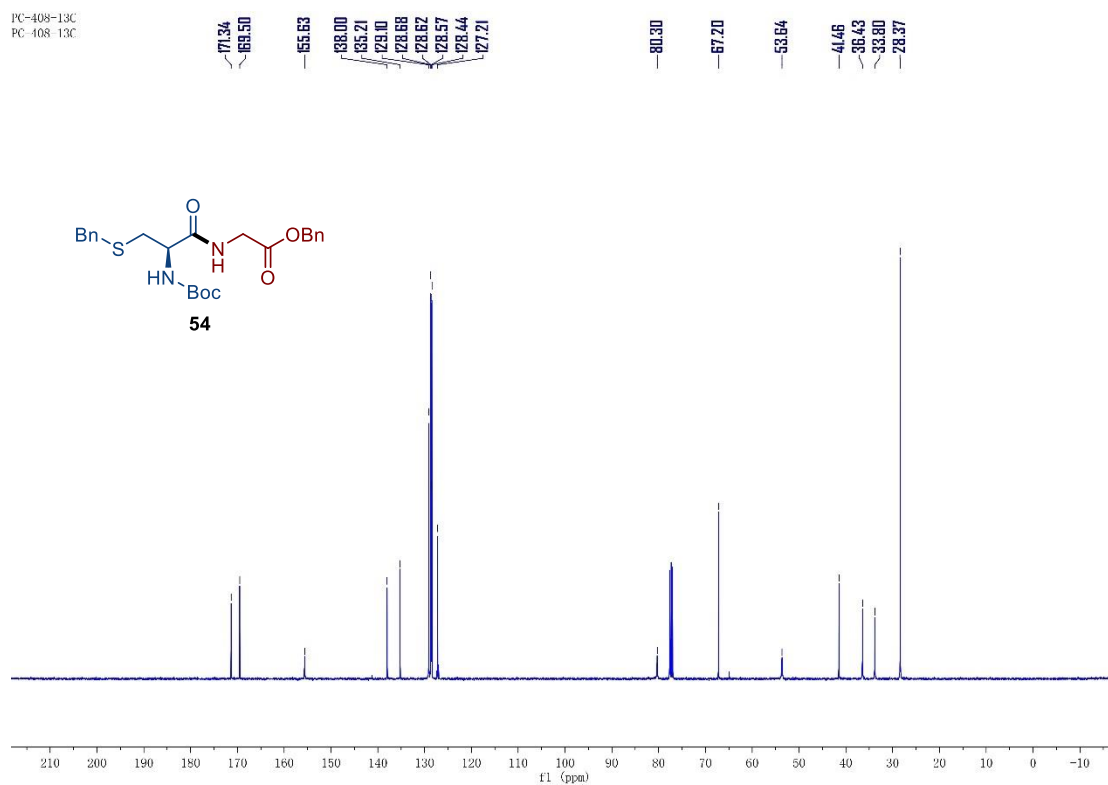



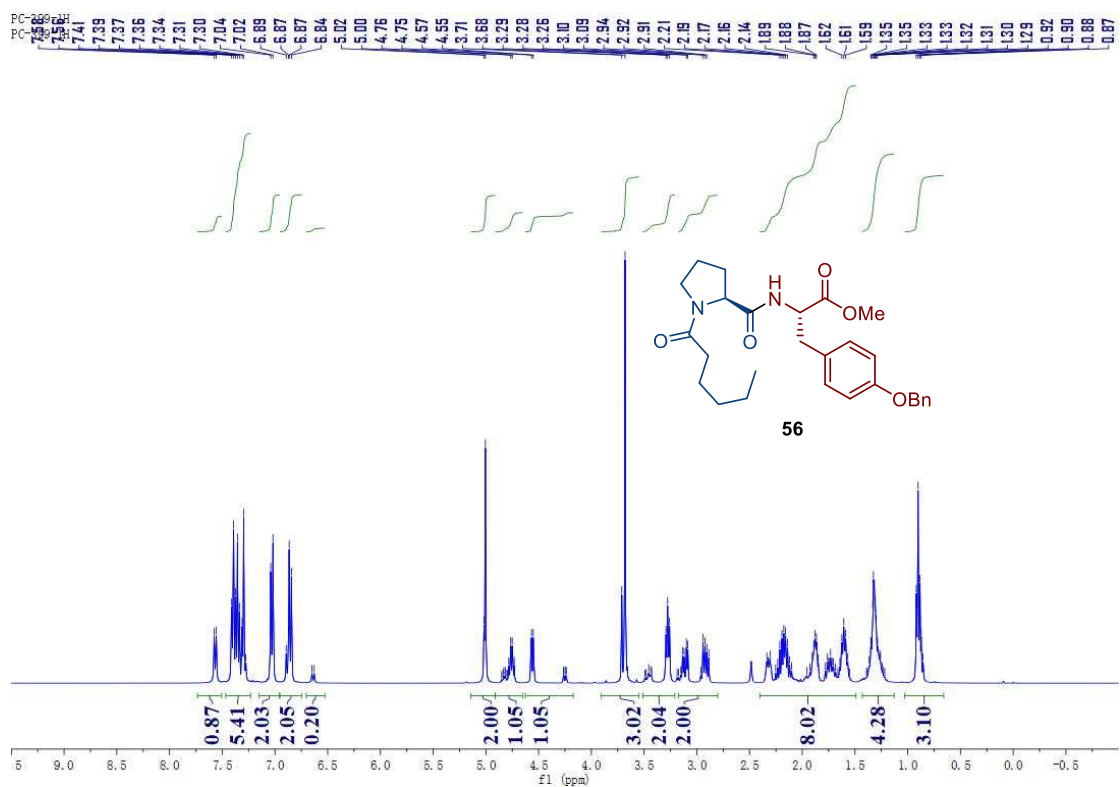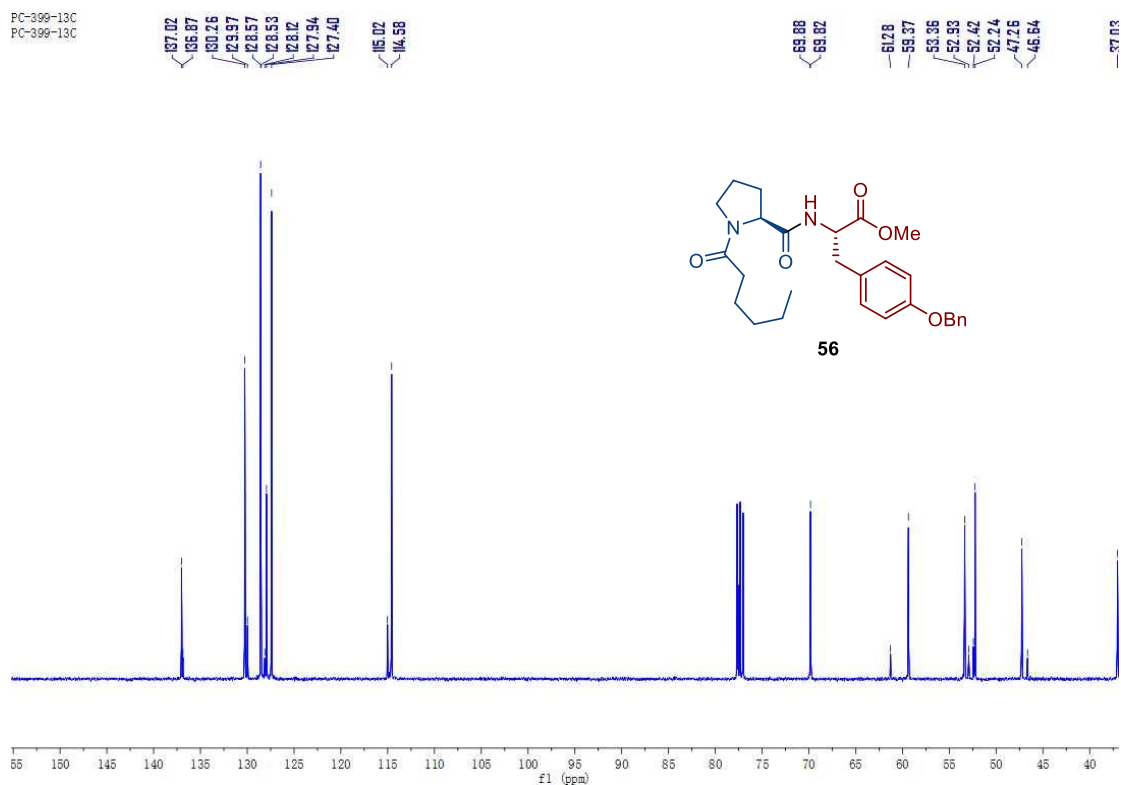

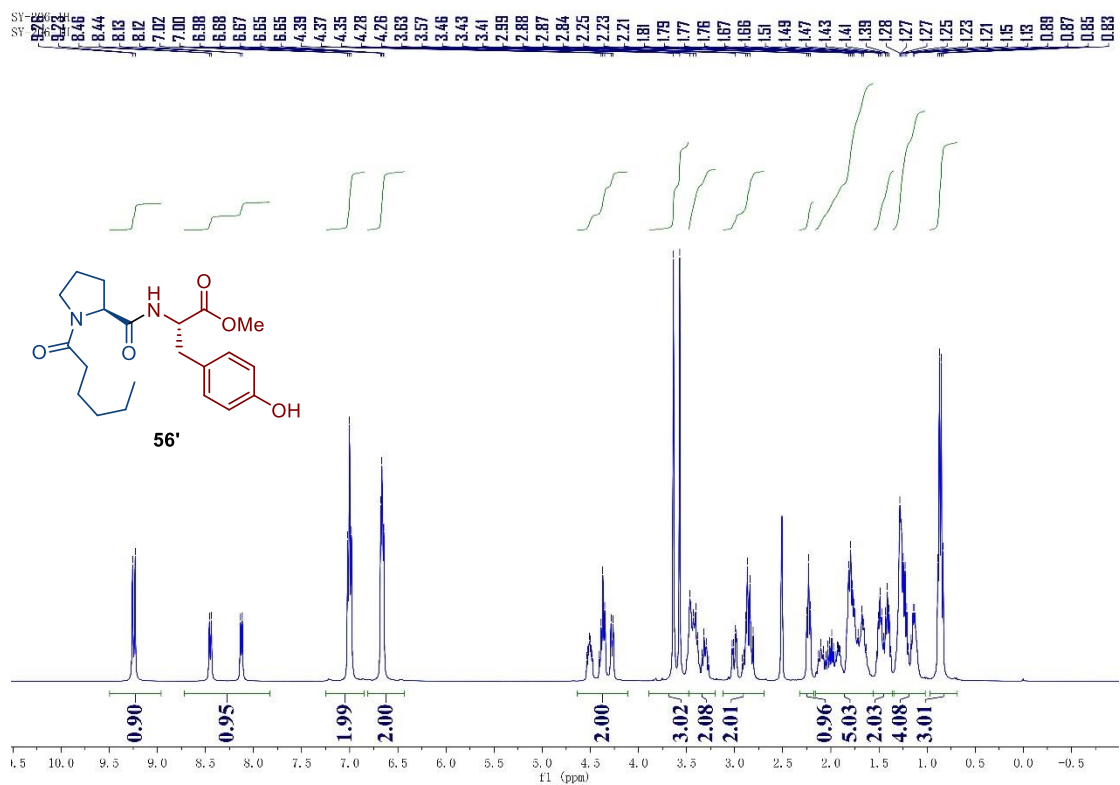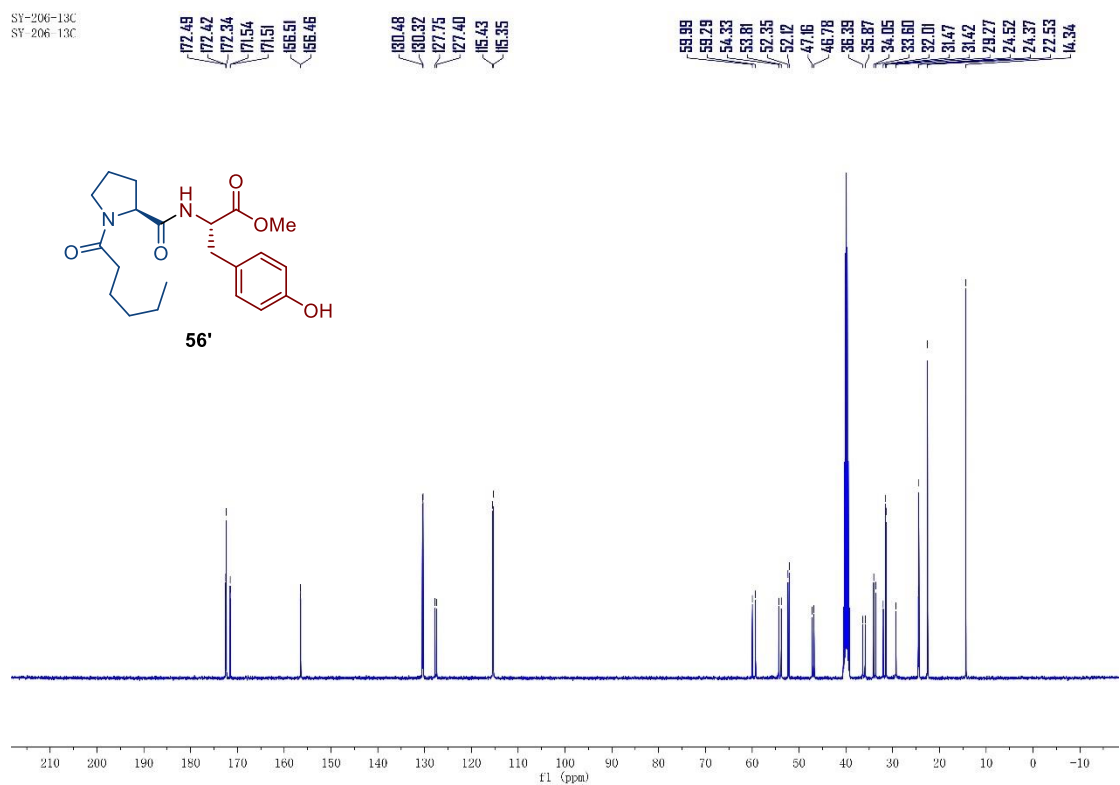

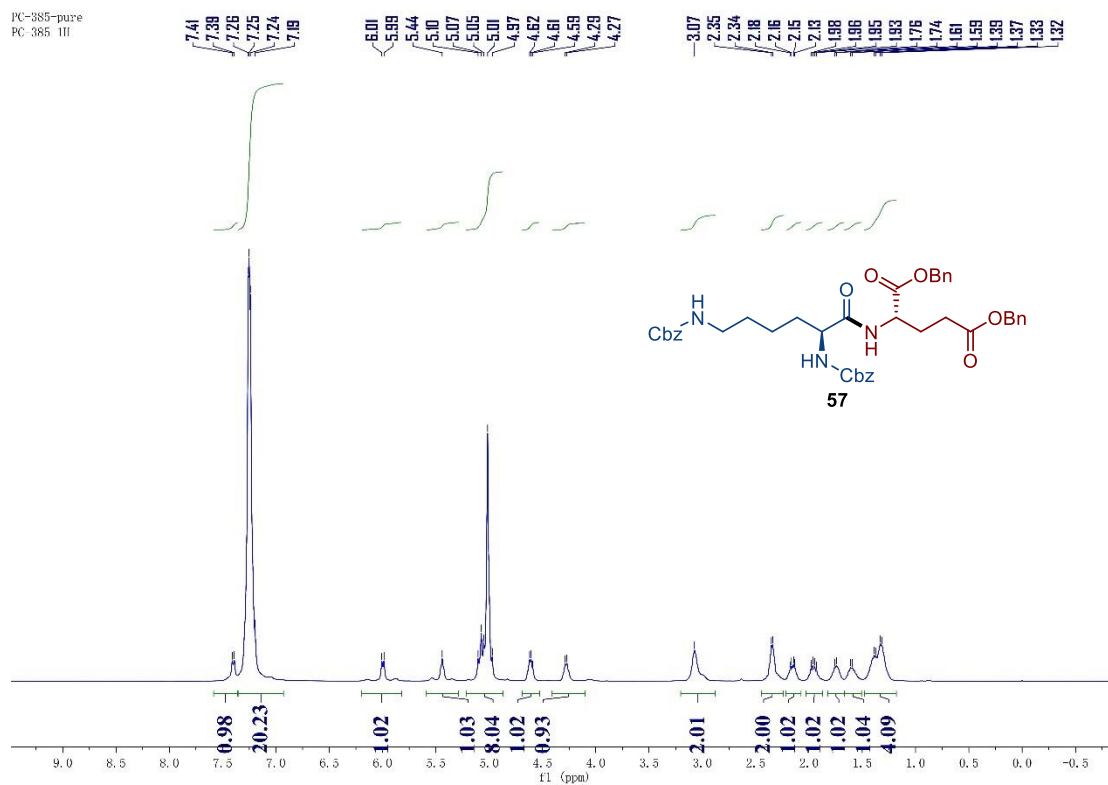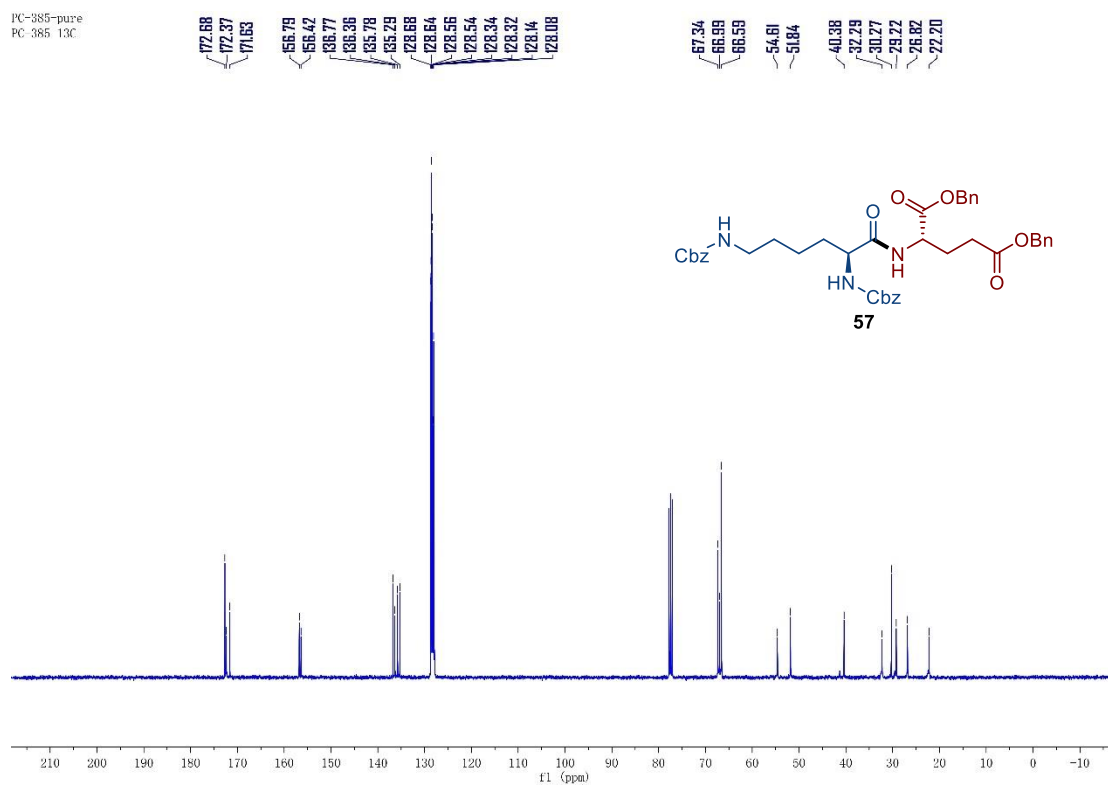

SY-212-shui  
SY-212-shui

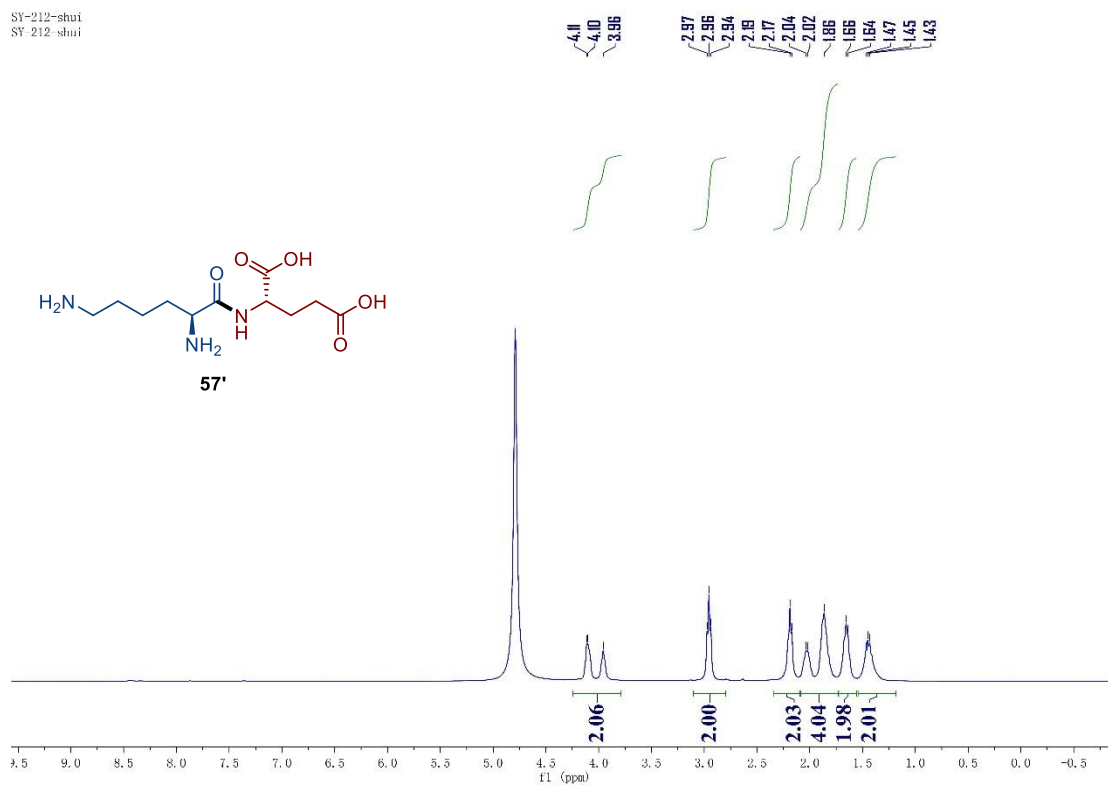

SY-299  
SY-211

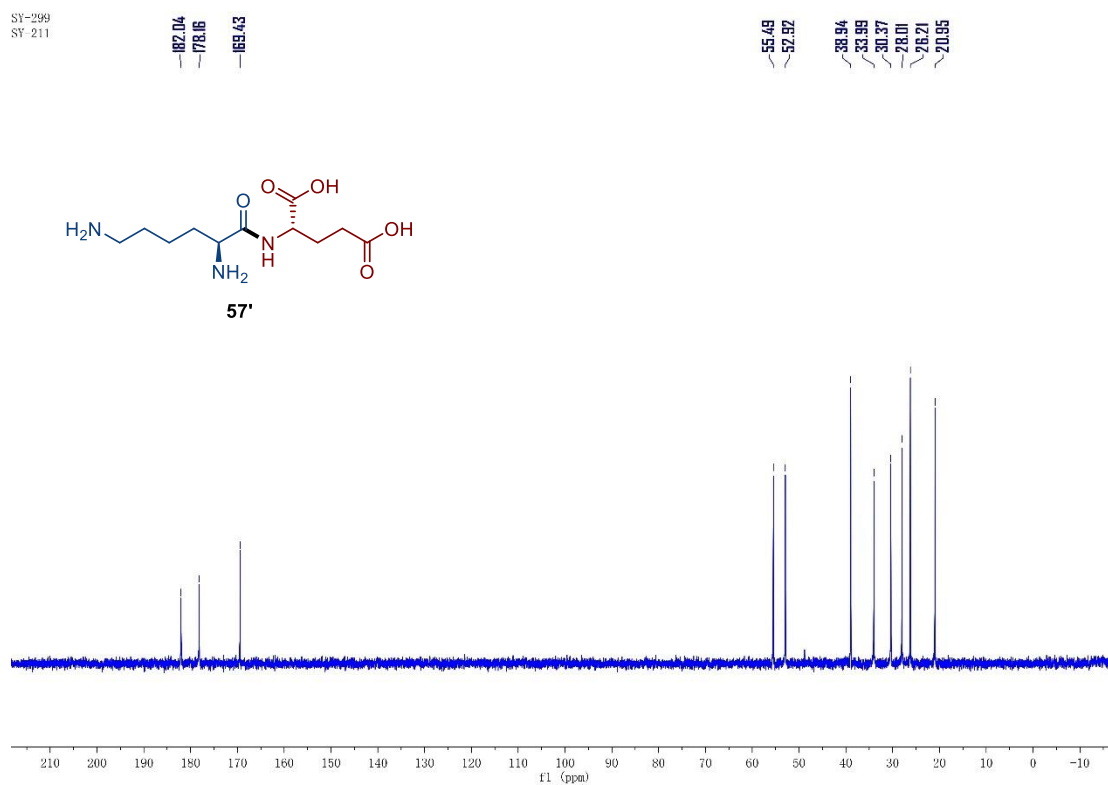

PC-436-1H  
PC-436-1H

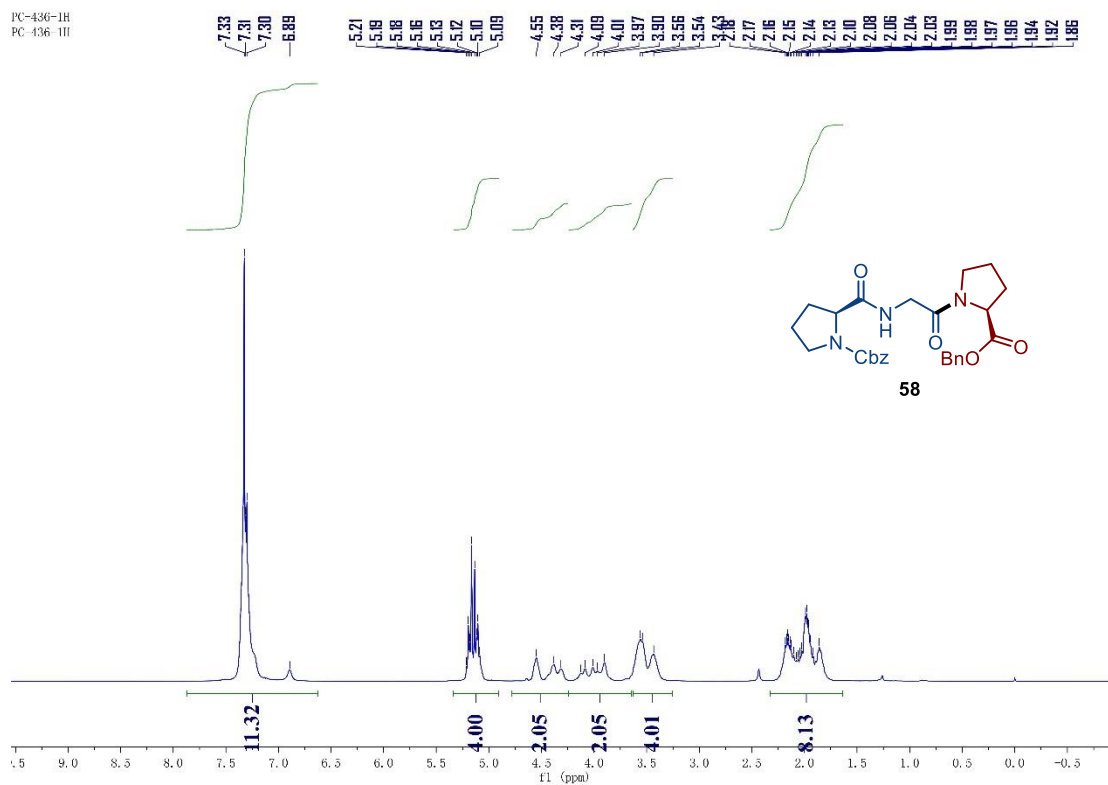

PC-436-13C  
PC-436-13C

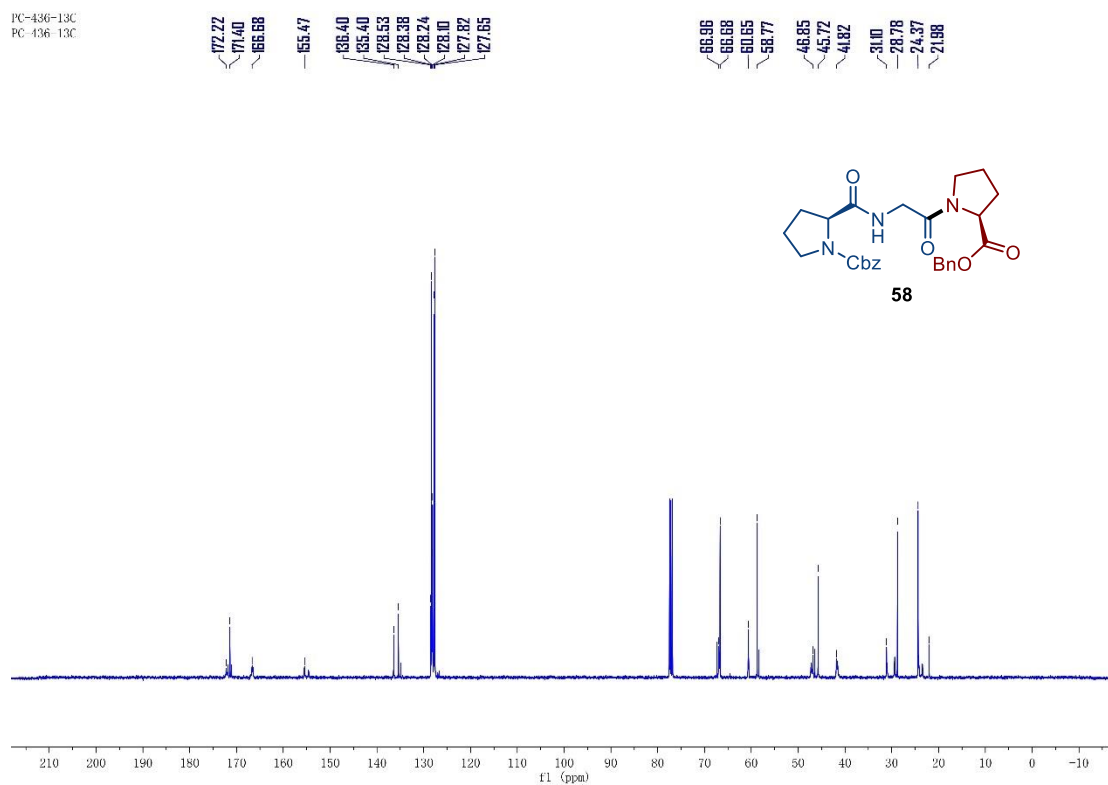

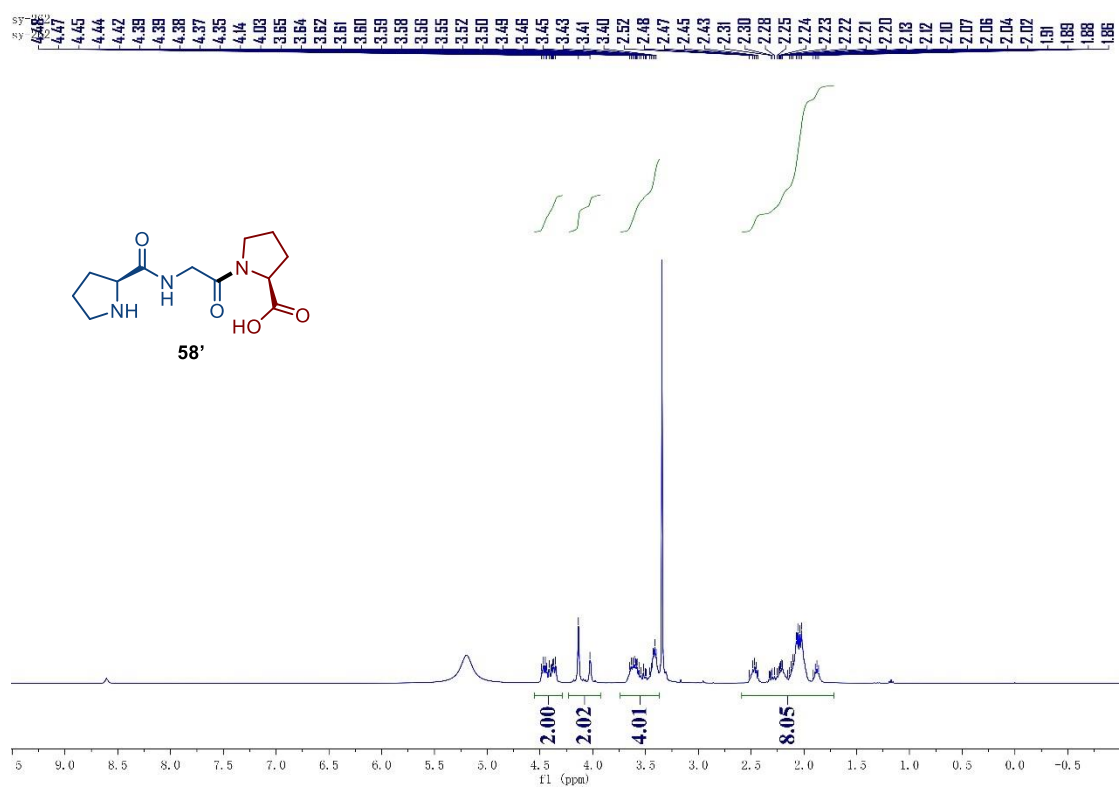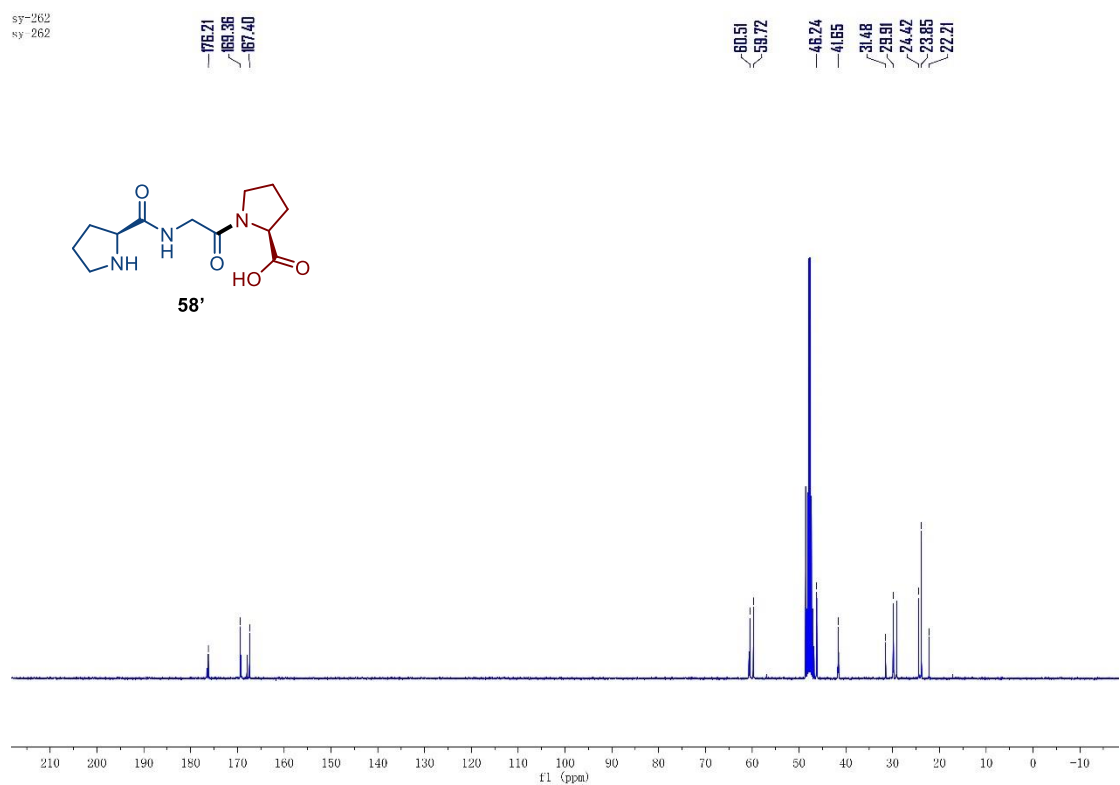



SY-230  
SY-230

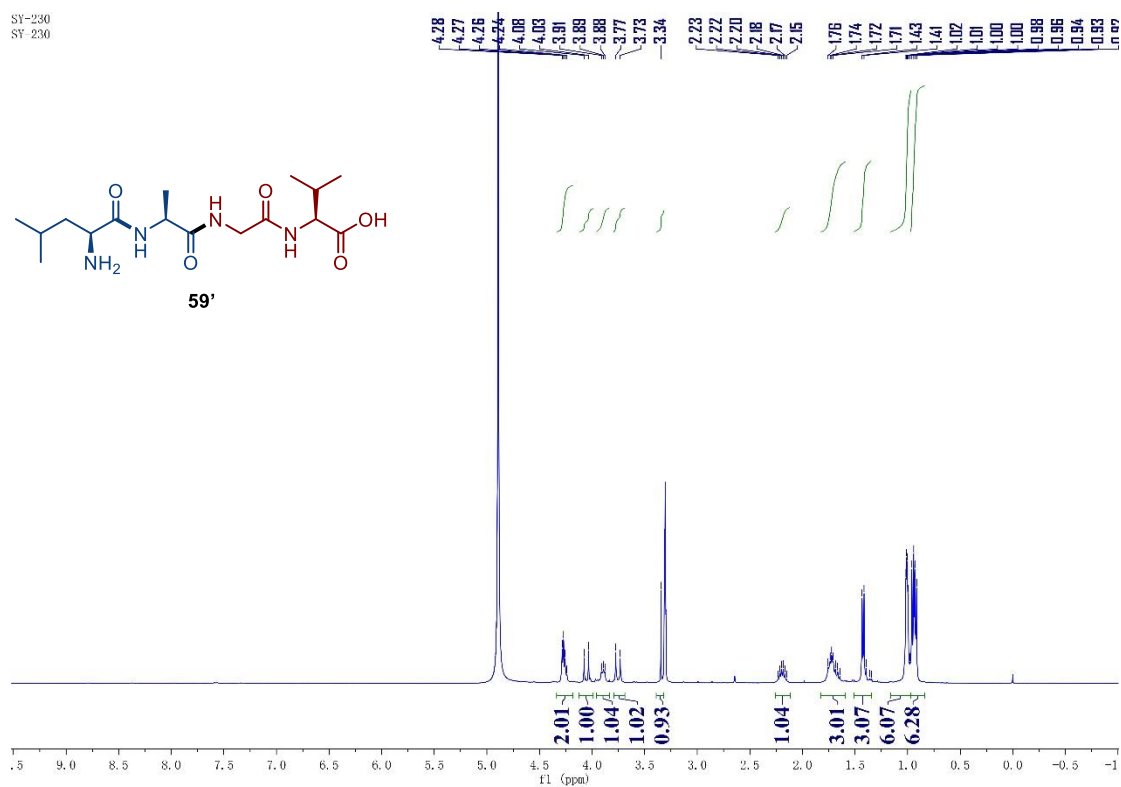

SY-230  
SY-230

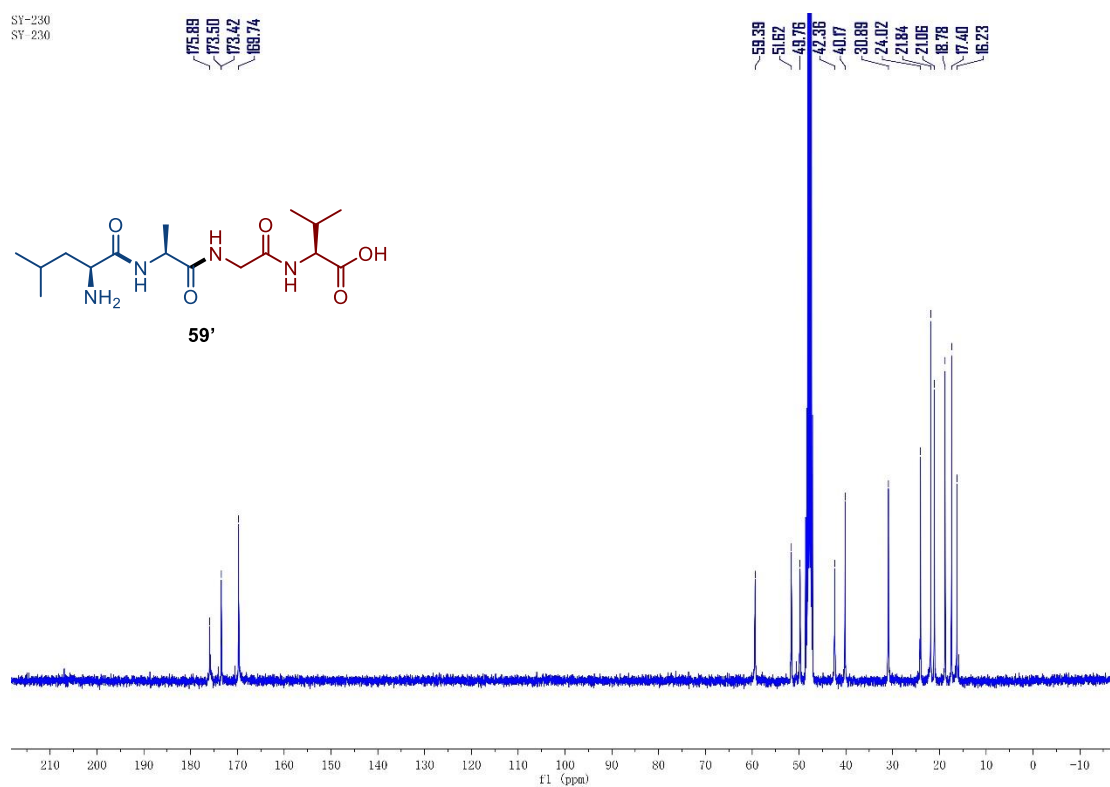

SY-230  
SY-230

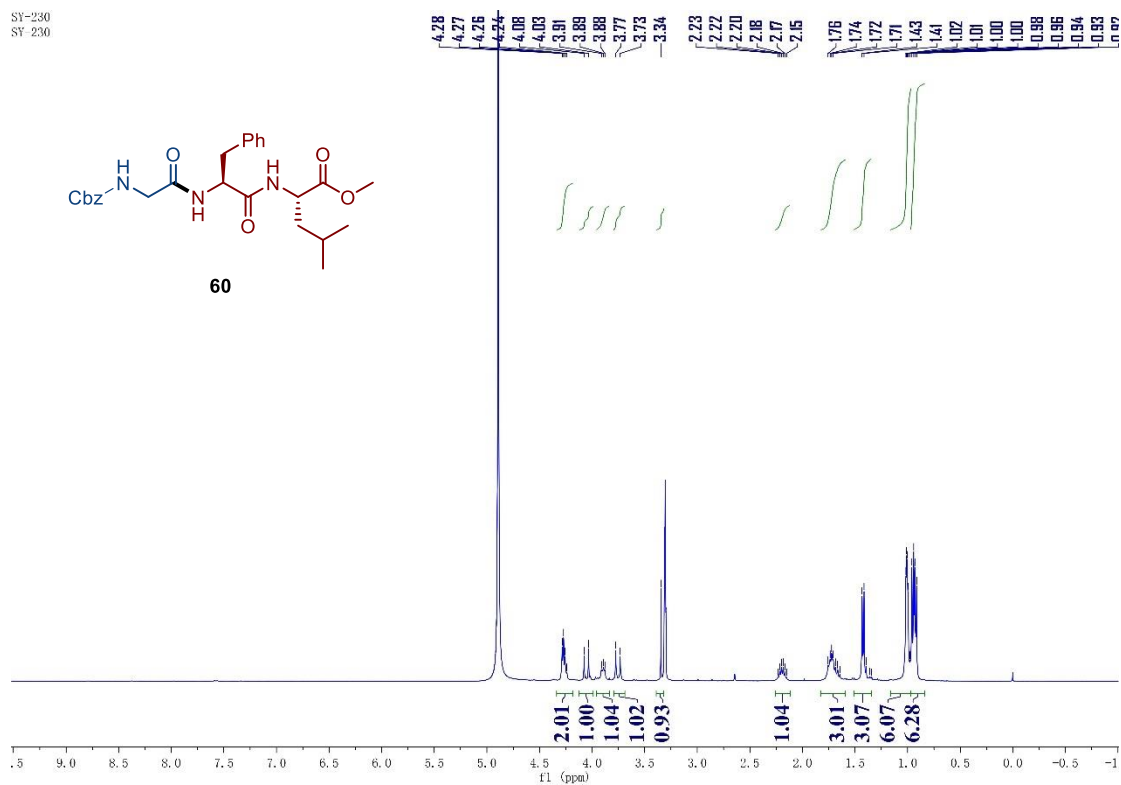

SY-230  
SY-230

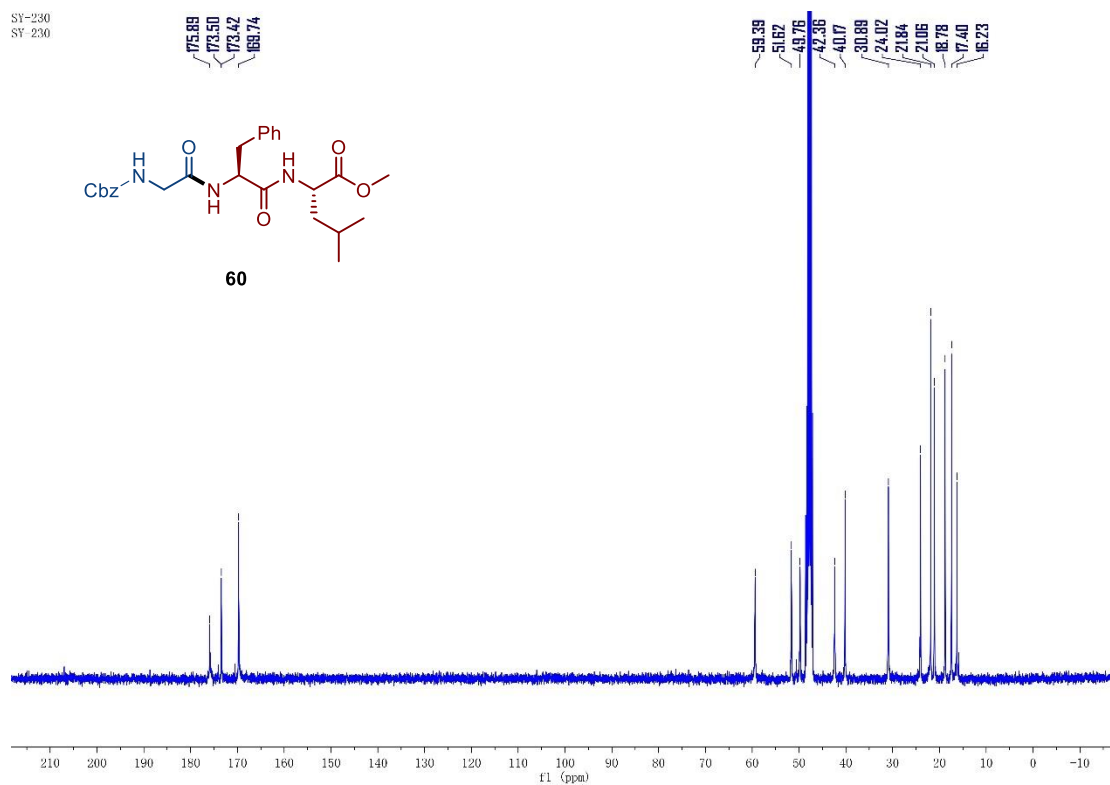

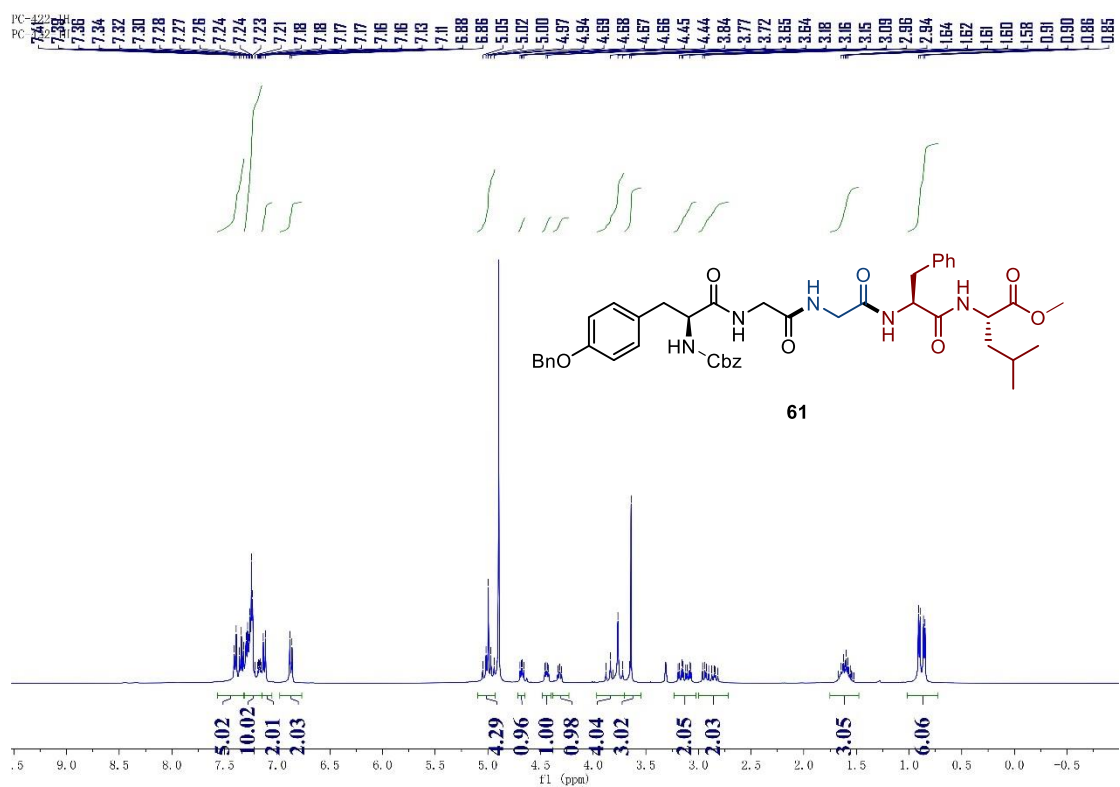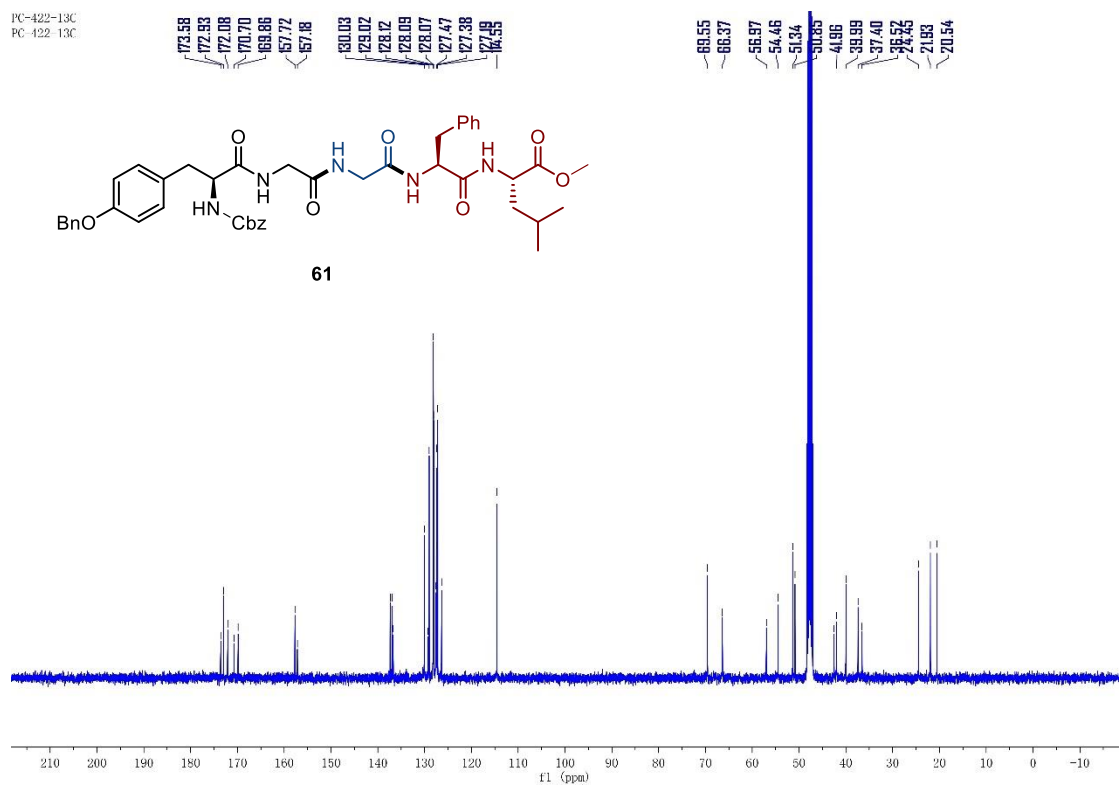

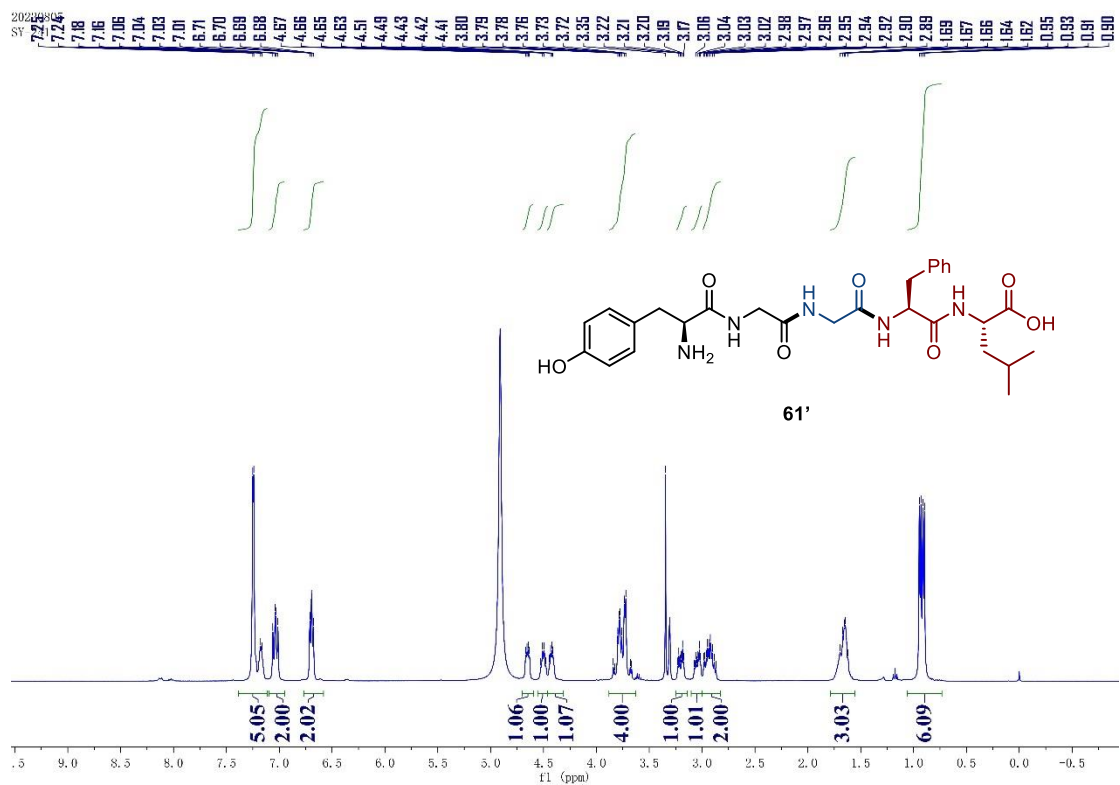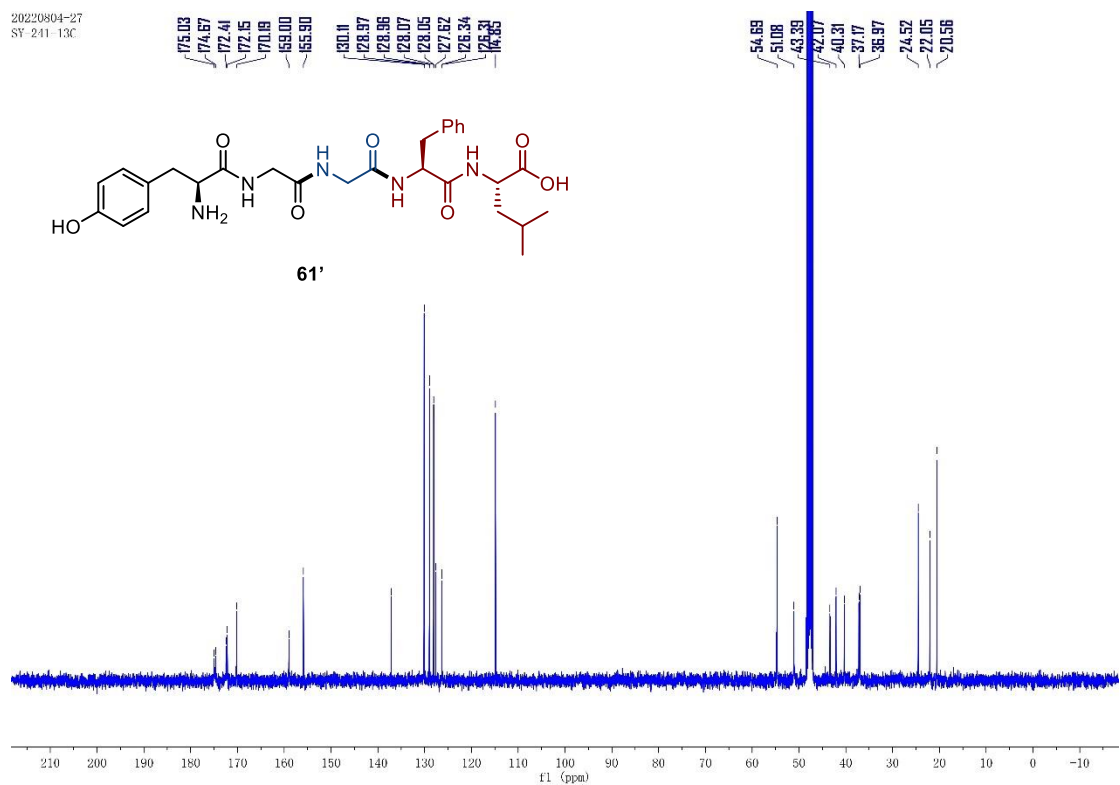

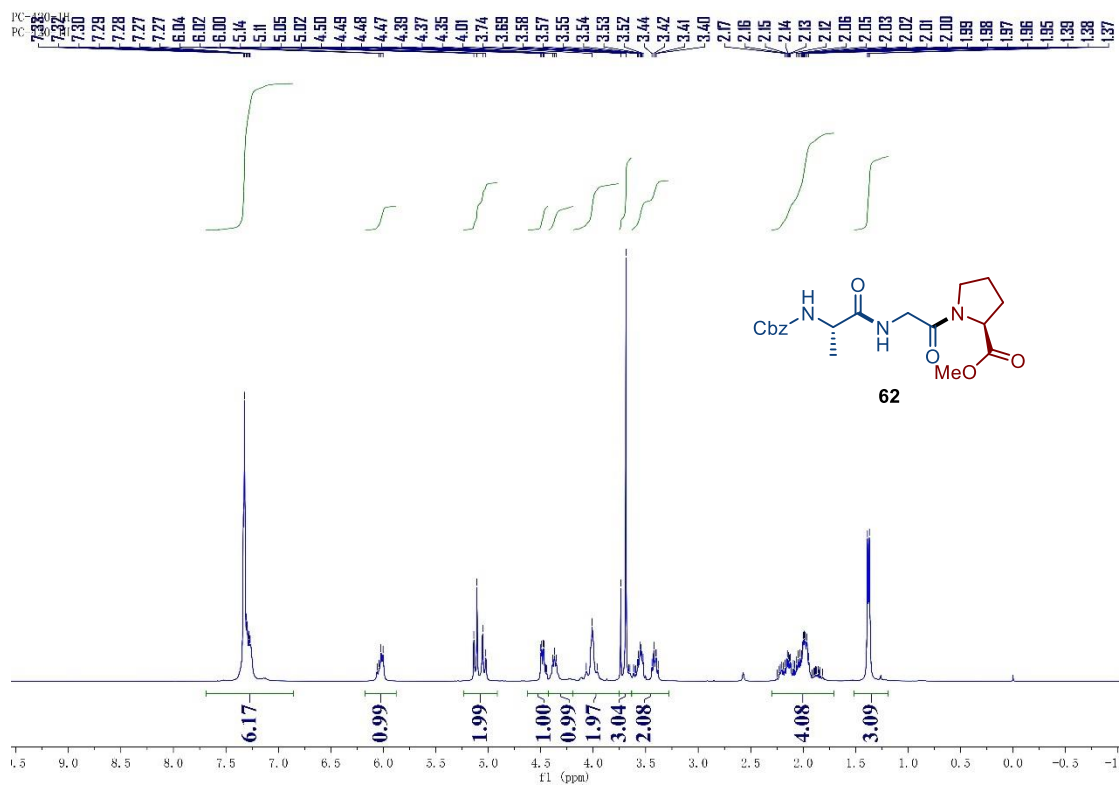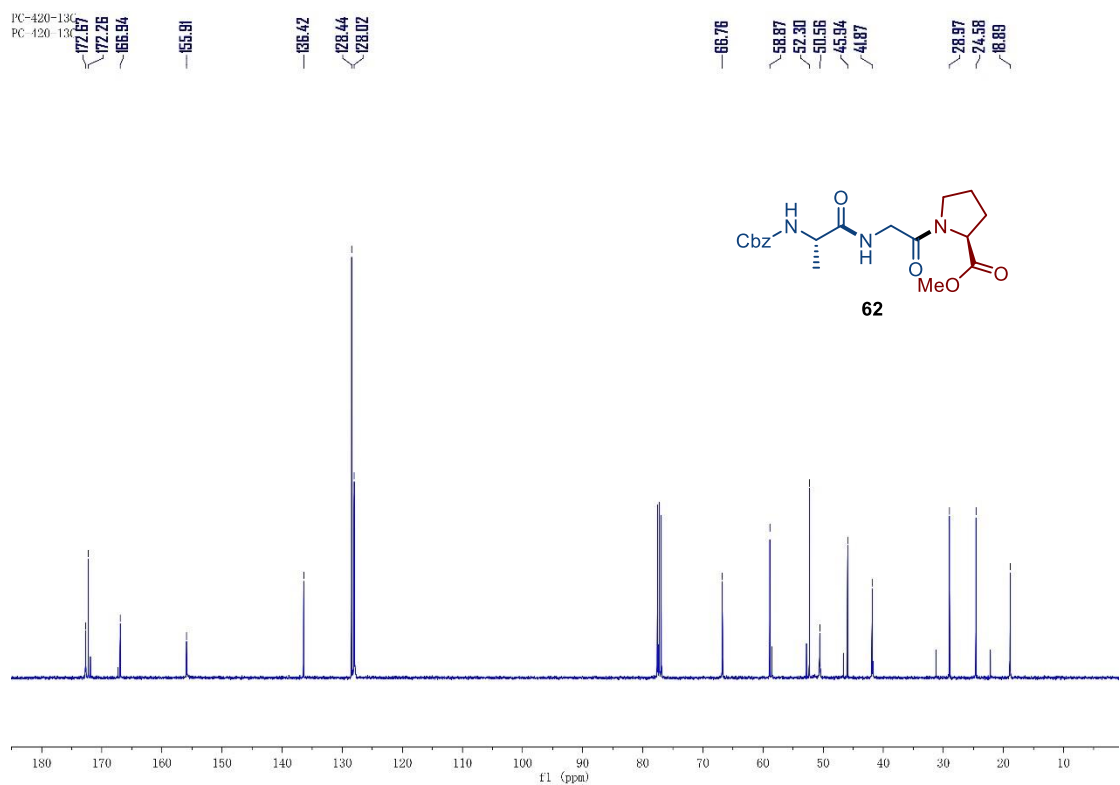

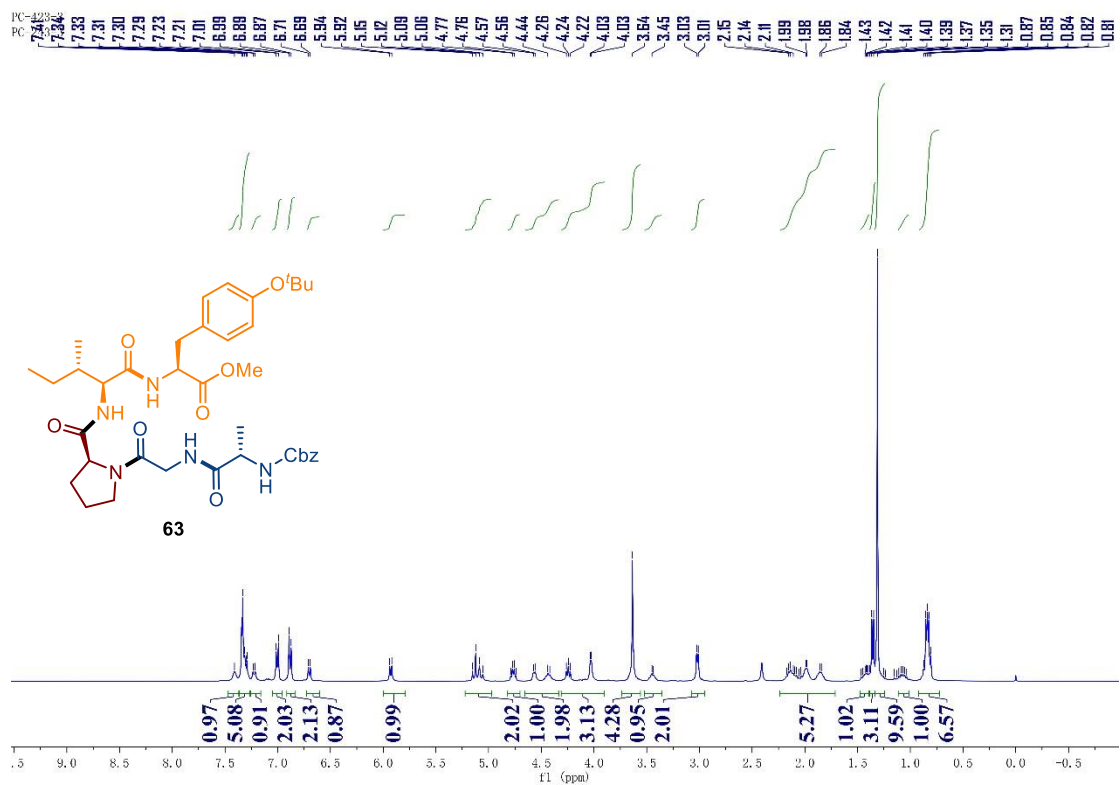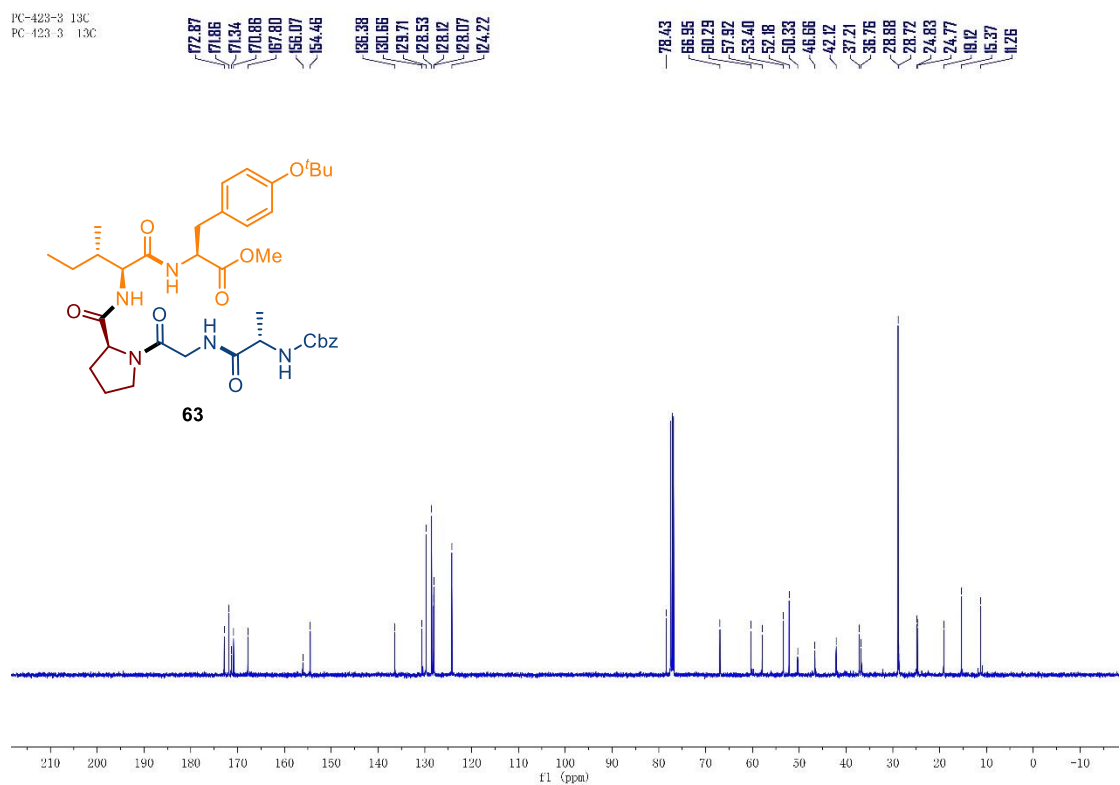

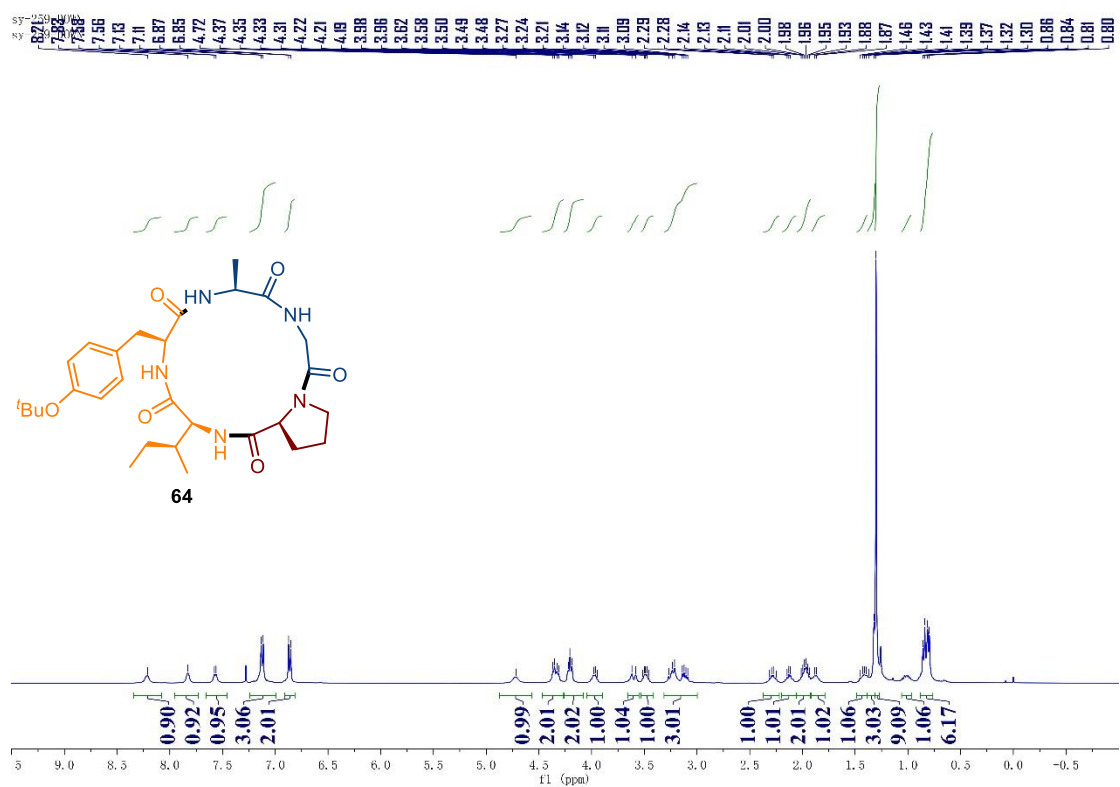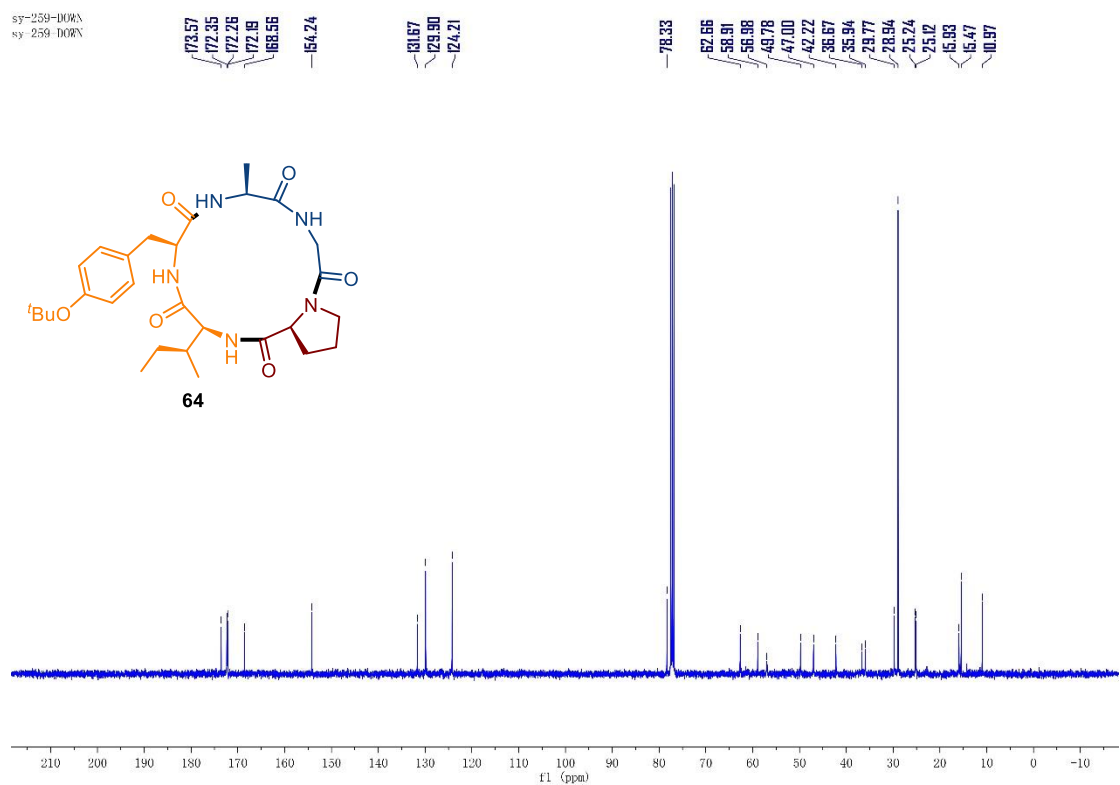

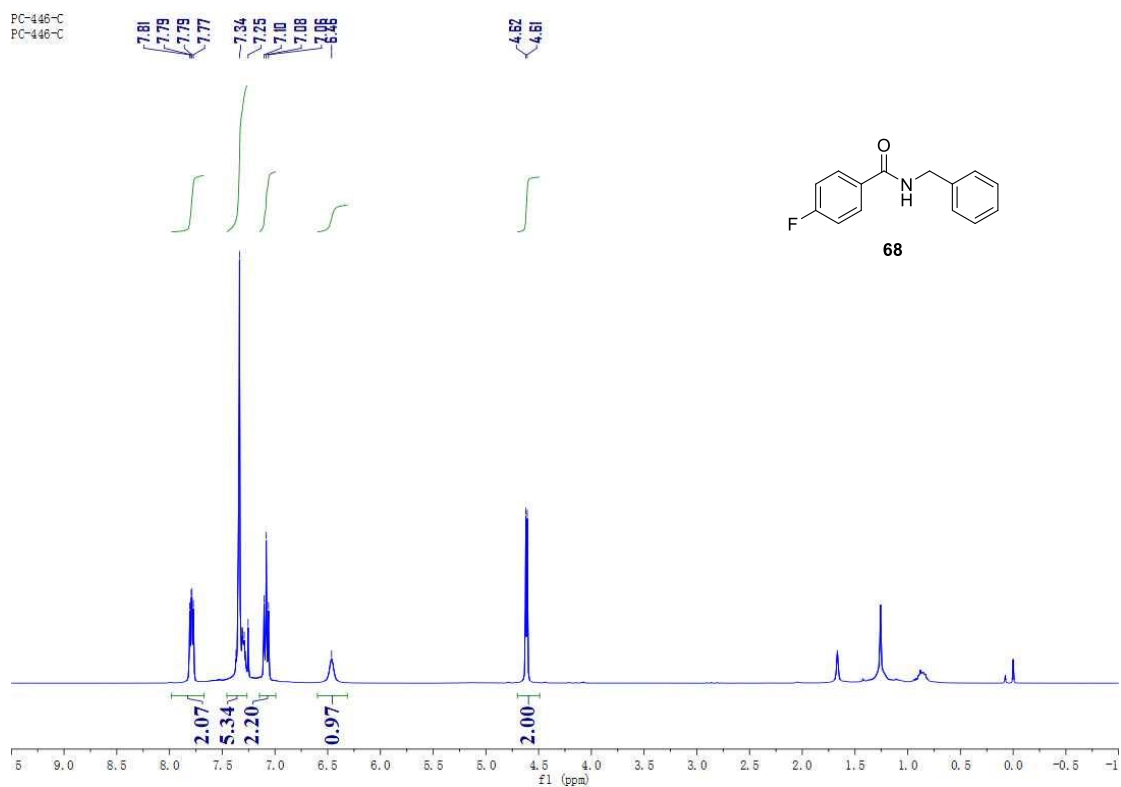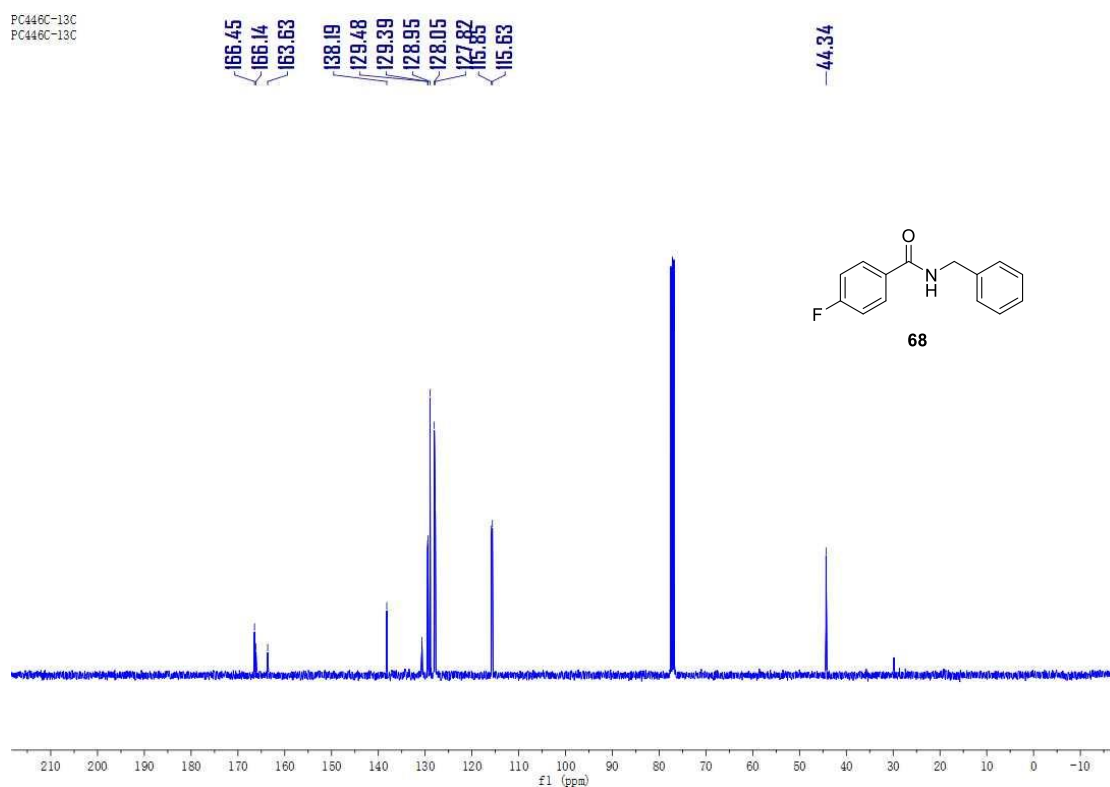

PC-446-C 19F  
PC-446-C 19F

-111.27

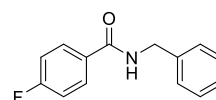

68

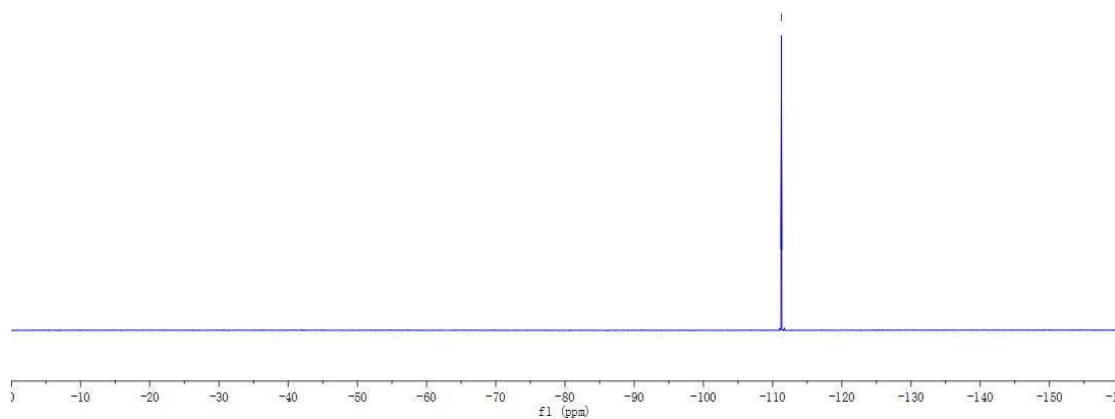

Supplement: d3qo00994g1.pdf [file d3qo00994g1.pdf]
